# Supplementary material for: Reconstruction and Analysis of Human Kidney-Specific Metabolic Network Based on Omics Data
Source: Hindawi journal article supplement (doi:10.1155/2013/187509), 2013-01-01
Supplement: f1 [file 187509.f1.zip]

Archive with 6 entries (6 files):
- kidney_model_par.xml
- Supplementary.pdf
- Table S1.xls
- Table S2.xls
- Table S3.xls
- ~$pplementary.doc
