# Supplementary material for: Reconstruction and Analysis of Human Kidney-Specific Metabolic Network Based on Omics Data
Source: Hindawi journal article supplement (doi:10.1155/2013/187509), 2013-01-01
Supplement: f1 [file 187509.f1.zip › kidney_model_par.xml]

<?xml version="1.0" encoding="UTF-8"?>
<sbml xmlns="http://www.sbml.org/sbml/level2/version4" level="2" version="4">
  <model id="model_kidney_par_xml">
    <listOfUnitDefinitions>
      <unitDefinition id="mmol_per_gDW_per_hr">
        <listOfUnits>
          <unit kind="mole" exponent="1" scale="-3" multiplier="1"/>
          <unit kind="gram" exponent="-1" scale="0" multiplier="1"/>
          <unit kind="second" exponent="-1" scale="0" multiplier="0.000277777777777778"/>
        </listOfUnits>
      </unitDefinition>
    </listOfUnitDefinitions>
    <listOfCompartments>
      <compartment id="c" name="Cytoplasm" spatialDimensions="3" constant="false"/>
      <compartment id="e" name="Extracellular" spatialDimensions="3" constant="false"/>
    </listOfCompartments>
    <listOfSpecies>
      <species id="M_10fthf5glu_c" name="10-formyltetrahydrofolate-[Glu](5)" compartment="c" hasOnlySubstanceUnits="false" boundaryCondition="false" constant="false">
        <notes>
          <body xmlns="http://www.w3.org/1999/xhtml">
            <p>FORMULA: C40H45N11O19</p>
            <p>CHARGE: 0</p>
          </body>
        </notes>
      </species>
      <species id="M_10fthf5glu_e" name="10-formyltetrahydrofolate-[Glu](5)" compartment="e" hasOnlySubstanceUnits="false" boundaryCondition="false" constant="false">
        <notes>
          <body xmlns="http://www.w3.org/1999/xhtml">
            <p>FORMULA: C40H45N11O19</p>
            <p>CHARGE: 0</p>
          </body>
        </notes>
      </species>
      <species id="M_10fthf6glu_c" name="10-formyltetrahydrofolate-[Glu](6)" compartment="c" hasOnlySubstanceUnits="false" boundaryCondition="false" constant="false">
        <notes>
          <body xmlns="http://www.w3.org/1999/xhtml">
            <p>FORMULA: C45H51N12O22</p>
            <p>CHARGE: 0</p>
          </body>
        </notes>
      </species>
      <species id="M_10fthf6glu_e" name="10-formyltetrahydrofolate-[Glu](6)" compartment="e" hasOnlySubstanceUnits="false" boundaryCondition="false" constant="false">
        <notes>
          <body xmlns="http://www.w3.org/1999/xhtml">
            <p>FORMULA: C45H51N12O22</p>
            <p>CHARGE: 0</p>
          </body>
        </notes>
      </species>
      <species id="M_10fthf7glu_c" name="10-formyltetrahydrofolate-[Glu](7)" compartment="c" hasOnlySubstanceUnits="false" boundaryCondition="false" constant="false">
        <notes>
          <body xmlns="http://www.w3.org/1999/xhtml">
            <p>FORMULA: C50H57N13O25</p>
            <p>CHARGE: 0</p>
          </body>
        </notes>
      </species>
      <species id="M_10fthf7glu_e" name="10-formyltetrahydrofolate-[Glu](7)" compartment="e" hasOnlySubstanceUnits="false" boundaryCondition="false" constant="false">
        <notes>
          <body xmlns="http://www.w3.org/1999/xhtml">
            <p>FORMULA: C50H57N13O25</p>
            <p>CHARGE: 0</p>
          </body>
        </notes>
      </species>
      <species id="M_10fthf_c" name="10-Formyltetrahydrofolate" compartment="c" hasOnlySubstanceUnits="false" boundaryCondition="false" constant="false">
        <notes>
          <body xmlns="http://www.w3.org/1999/xhtml">
            <p>FORMULA: C20H21N7O7</p>
            <p>CHARGE: 0</p>
          </body>
        </notes>
      </species>
      <species id="M_10fthf_e" name="10-Formyltetrahydrofolate" compartment="e" hasOnlySubstanceUnits="false" boundaryCondition="false" constant="false">
        <notes>
          <body xmlns="http://www.w3.org/1999/xhtml">
            <p>FORMULA: C20H21N7O7</p>
            <p>CHARGE: 0</p>
          </body>
        </notes>
      </species>
      <species id="M_11_DASH_cis_DASH_retfa_c" name="fatty acid 11-cis-retinol" compartment="c" hasOnlySubstanceUnits="false" boundaryCondition="false" constant="false">
        <notes>
          <body xmlns="http://www.w3.org/1999/xhtml">
            <p>FORMULA: C20H29OFULLR2CO</p>
            <p>CHARGE: 0</p>
          </body>
        </notes>
      </species>
      <species id="M_11_DASH_cis_DASH_retfa_e" name="fatty acid 11-cis-retinol" compartment="e" hasOnlySubstanceUnits="false" boundaryCondition="false" constant="false">
        <notes>
          <body xmlns="http://www.w3.org/1999/xhtml">
            <p>FORMULA: C20H29OFULLR2CO</p>
            <p>CHARGE: 0</p>
          </body>
        </notes>
      </species>
      <species id="M_11docrtsl_c" name="11-Deoxycortisol" compartment="c" hasOnlySubstanceUnits="false" boundaryCondition="false" constant="false">
        <notes>
          <body xmlns="http://www.w3.org/1999/xhtml">
            <p>FORMULA: C21H30O4</p>
            <p>CHARGE: 0</p>
          </body>
        </notes>
      </species>
      <species id="M_11docrtstrn_c" name="11-Deoxycorticosterone" compartment="c" hasOnlySubstanceUnits="false" boundaryCondition="false" constant="false">
        <notes>
          <body xmlns="http://www.w3.org/1999/xhtml">
            <p>FORMULA: C21H30O3</p>
            <p>CHARGE: 0</p>
          </body>
        </notes>
      </species>
      <species id="M_12HPET_c" name="12-Hydroperoxyeicosa-5,8,10,14-tetraenoate" compartment="c" hasOnlySubstanceUnits="false" boundaryCondition="false" constant="false">
        <notes>
          <body xmlns="http://www.w3.org/1999/xhtml">
            <p>FORMULA: C20H31O4</p>
            <p>CHARGE: 0</p>
          </body>
        </notes>
      </species>
      <species id="M_12RHPET_c" name="12R-Hydroperoxyeicosatetraenoate" compartment="c" hasOnlySubstanceUnits="false" boundaryCondition="false" constant="false">
        <notes>
          <body xmlns="http://www.w3.org/1999/xhtml">
            <p>FORMULA: C20H31O4</p>
            <p>CHARGE: 0</p>
          </body>
        </notes>
      </species>
      <species id="M_12harachd_c" name="12 hydroxy arachidonic acid" compartment="c" hasOnlySubstanceUnits="false" boundaryCondition="false" constant="false">
        <notes>
          <body xmlns="http://www.w3.org/1999/xhtml">
            <p>FORMULA: C20H31O3</p>
            <p>CHARGE: 0</p>
          </body>
        </notes>
      </species>
      <species id="M_12ppd_DASH_R_c" name="(R)-Propane-1,2-diol" compartment="c" hasOnlySubstanceUnits="false" boundaryCondition="false" constant="false">
        <notes>
          <body xmlns="http://www.w3.org/1999/xhtml">
            <p>FORMULA: C3H8O2</p>
            <p>CHARGE: 0</p>
          </body>
        </notes>
      </species>
      <species id="M_12ppd_DASH_S_c" name="(S)-Propane-1,2-diol" compartment="c" hasOnlySubstanceUnits="false" boundaryCondition="false" constant="false">
        <notes>
          <body xmlns="http://www.w3.org/1999/xhtml">
            <p>FORMULA: C3H8O2</p>
            <p>CHARGE: 0</p>
          </body>
        </notes>
      </species>
      <species id="M_13_DASH_cis_DASH_oretn_c" name="13-cis-oxo-retinoic acid" compartment="c" hasOnlySubstanceUnits="false" boundaryCondition="false" constant="false">
        <notes>
          <body xmlns="http://www.w3.org/1999/xhtml">
            <p>FORMULA: C20H27O3</p>
            <p>CHARGE: 0</p>
          </body>
        </notes>
      </species>
      <species id="M_13_DASH_cis_DASH_retn_c" name="13-cis-retinoate" compartment="c" hasOnlySubstanceUnits="false" boundaryCondition="false" constant="false">
        <notes>
          <body xmlns="http://www.w3.org/1999/xhtml">
            <p>FORMULA: C20H27O2</p>
            <p>CHARGE: 0</p>
          </body>
        </notes>
      </species>
      <species id="M_13_DASH_cis_DASH_retnglc_c" name="13-cis-retinoyl glucuronide" compartment="c" hasOnlySubstanceUnits="false" boundaryCondition="false" constant="false">
        <notes>
          <body xmlns="http://www.w3.org/1999/xhtml">
            <p>FORMULA: C26H35O8</p>
            <p>CHARGE: 0</p>
          </body>
        </notes>
      </species>
      <species id="M_13_DASH_cis_DASH_retnglc_e" name="13-cis-retinoyl glucuronide" compartment="e" hasOnlySubstanceUnits="false" boundaryCondition="false" constant="false">
        <notes>
          <body xmlns="http://www.w3.org/1999/xhtml">
            <p>FORMULA: C26H35O8</p>
            <p>CHARGE: 0</p>
          </body>
        </notes>
      </species>
      <species id="M_13dampp_c" name="1,3-Diaminopropane" compartment="c" hasOnlySubstanceUnits="false" boundaryCondition="false" constant="false">
        <notes>
          <body xmlns="http://www.w3.org/1999/xhtml">
            <p>FORMULA: C3H12N2</p>
            <p>CHARGE: 0</p>
          </body>
        </notes>
      </species>
      <species id="M_13dpg_c" name="3-Phospho-D-glyceroyl phosphate" compartment="c" hasOnlySubstanceUnits="false" boundaryCondition="false" constant="false">
        <notes>
          <body xmlns="http://www.w3.org/1999/xhtml">
            <p>FORMULA: C3H4O10P2</p>
            <p>CHARGE: 0</p>
          </body>
        </notes>
      </species>
      <species id="M_15HPET_c" name="15-Hydroperoxyeicosatetraenoic acid" compartment="c" hasOnlySubstanceUnits="false" boundaryCondition="false" constant="false">
        <notes>
          <body xmlns="http://www.w3.org/1999/xhtml">
            <p>FORMULA: C20H31O4</p>
            <p>CHARGE: 0</p>
          </body>
        </notes>
      </species>
      <species id="M_17ahprgnlone_c" name="17alpha-Hydroxypregnenolone" compartment="c" hasOnlySubstanceUnits="false" boundaryCondition="false" constant="false">
        <notes>
          <body xmlns="http://www.w3.org/1999/xhtml">
            <p>FORMULA: C21H32O3</p>
            <p>CHARGE: 0</p>
          </body>
        </notes>
      </species>
      <species id="M_17ahprgstrn_c" name="17alpha-Hydroxyprogesterone" compartment="c" hasOnlySubstanceUnits="false" boundaryCondition="false" constant="false">
        <notes>
          <body xmlns="http://www.w3.org/1999/xhtml">
            <p>FORMULA: C21H30O3</p>
            <p>CHARGE: 0</p>
          </body>
        </notes>
      </species>
      <species id="M_18harachd_c" name="18 hydroxy arachidonic acid" compartment="c" hasOnlySubstanceUnits="false" boundaryCondition="false" constant="false">
        <notes>
          <body xmlns="http://www.w3.org/1999/xhtml">
            <p>FORMULA: C20H31O3</p>
            <p>CHARGE: 0</p>
          </body>
        </notes>
      </species>
      <species id="M_1a2425thvitd2_c" name="1-alpha,24R,25-Trihydroxyvitamin D2" compartment="c" hasOnlySubstanceUnits="false" boundaryCondition="false" constant="false">
        <notes>
          <body xmlns="http://www.w3.org/1999/xhtml">
            <p>FORMULA: C28H44O4</p>
            <p>CHARGE: 0</p>
          </body>
        </notes>
      </species>
      <species id="M_1a2425thvitd3_c" name="1-alpha,24R,25-Trihydroxyvitamin D3" compartment="c" hasOnlySubstanceUnits="false" boundaryCondition="false" constant="false">
        <notes>
          <body xmlns="http://www.w3.org/1999/xhtml">
            <p>FORMULA: C27H44O4</p>
            <p>CHARGE: 0</p>
          </body>
        </notes>
      </species>
      <species id="M_1a25dhvitd2_c" name="1-alpha,25-Dihydroxyvitamin D2" compartment="c" hasOnlySubstanceUnits="false" boundaryCondition="false" constant="false">
        <notes>
          <body xmlns="http://www.w3.org/1999/xhtml">
            <p>FORMULA: C28H44O3</p>
            <p>CHARGE: 0</p>
          </body>
        </notes>
      </species>
      <species id="M_1a25dhvitd3_c" name="1-alpha,25-Dihydroxyvitamin D3" compartment="c" hasOnlySubstanceUnits="false" boundaryCondition="false" constant="false">
        <notes>
          <body xmlns="http://www.w3.org/1999/xhtml">
            <p>FORMULA: C27H44O3</p>
            <p>CHARGE: 0</p>
          </body>
        </notes>
      </species>
      <species id="M_1glyc_hs_e" name="1 acyl phosphoglycerol" compartment="e" hasOnlySubstanceUnits="false" boundaryCondition="false" constant="false">
        <notes>
          <body xmlns="http://www.w3.org/1999/xhtml">
            <p>FORMULA: C6H13O7PFULLRCO2</p>
            <p>CHARGE: 0</p>
          </body>
        </notes>
      </species>
      <species id="M_1mncam_c" name="1-Methylnicotinamide" compartment="c" hasOnlySubstanceUnits="false" boundaryCondition="false" constant="false">
        <notes>
          <body xmlns="http://www.w3.org/1999/xhtml">
            <p>FORMULA: C7H9N2O</p>
            <p>CHARGE: 0</p>
          </body>
        </notes>
      </species>
      <species id="M_1mncam_e" name="1-Methylnicotinamide" compartment="e" hasOnlySubstanceUnits="false" boundaryCondition="false" constant="false">
        <notes>
          <body xmlns="http://www.w3.org/1999/xhtml">
            <p>FORMULA: C7H9N2O</p>
            <p>CHARGE: 0</p>
          </body>
        </notes>
      </species>
      <species id="M_1mpyr_c" name="1-Methylpyrrolinium" compartment="c" hasOnlySubstanceUnits="false" boundaryCondition="false" constant="false">
        <notes>
          <body xmlns="http://www.w3.org/1999/xhtml">
            <p>FORMULA: C5H10N</p>
            <p>CHARGE: 0</p>
          </body>
        </notes>
      </species>
      <species id="M_1p2cbxl_c" name="1-Pyrroline-2-carboxylate" compartment="c" hasOnlySubstanceUnits="false" boundaryCondition="false" constant="false">
        <notes>
          <body xmlns="http://www.w3.org/1999/xhtml">
            <p>FORMULA: C5H6NO2</p>
            <p>CHARGE: 0</p>
          </body>
        </notes>
      </species>
      <species id="M_1p3h5c_c" name="L-1-Pyrroline-3-hydroxy-5-carboxylate" compartment="c" hasOnlySubstanceUnits="false" boundaryCondition="false" constant="false">
        <notes>
          <body xmlns="http://www.w3.org/1999/xhtml">
            <p>FORMULA: C5H6NO3</p>
            <p>CHARGE: 0</p>
          </body>
        </notes>
      </species>
      <species id="M_1pipdn2c_c" name="delta1-Piperideine-2-carboxylate" compartment="c" hasOnlySubstanceUnits="false" boundaryCondition="false" constant="false">
        <notes>
          <body xmlns="http://www.w3.org/1999/xhtml">
            <p>FORMULA: C6H9NO2</p>
            <p>CHARGE: 0</p>
          </body>
        </notes>
      </species>
      <species id="M_1pyr5c_c" name="1-Pyrroline-5-carboxylate" compartment="c" hasOnlySubstanceUnits="false" boundaryCondition="false" constant="false">
        <notes>
          <body xmlns="http://www.w3.org/1999/xhtml">
            <p>FORMULA: C5H6NO2</p>
            <p>CHARGE: 0</p>
          </body>
        </notes>
      </species>
      <species id="M_20ahchsterol_c" name="20alpha-hydroxy cholesterol" compartment="c" hasOnlySubstanceUnits="false" boundaryCondition="false" constant="false">
        <notes>
          <body xmlns="http://www.w3.org/1999/xhtml">
            <p>FORMULA: C27H46O2</p>
            <p>CHARGE: 0</p>
          </body>
        </notes>
      </species>
      <species id="M_23doguln_c" name="2,3-Dioxo-L-gulonate" compartment="c" hasOnlySubstanceUnits="false" boundaryCondition="false" constant="false">
        <notes>
          <body xmlns="http://www.w3.org/1999/xhtml">
            <p>FORMULA: C6H7O7</p>
            <p>CHARGE: 0</p>
          </body>
        </notes>
      </species>
      <species id="M_23dpg_c" name="2,3-Disphospho-D-glycerate" compartment="c" hasOnlySubstanceUnits="false" boundaryCondition="false" constant="false">
        <notes>
          <body xmlns="http://www.w3.org/1999/xhtml">
            <p>FORMULA: C3H3O10P2</p>
            <p>CHARGE: 0</p>
          </body>
        </notes>
      </species>
      <species id="M_2425dhvitd2_c" name="24R,25-Dihyoxyvitamin D2" compartment="c" hasOnlySubstanceUnits="false" boundaryCondition="false" constant="false">
        <notes>
          <body xmlns="http://www.w3.org/1999/xhtml">
            <p>FORMULA: C28H44O3</p>
            <p>CHARGE: 0</p>
          </body>
        </notes>
      </species>
      <species id="M_2425dhvitd2_e" name="24R,25-Dihyoxyvitamin D2" compartment="e" hasOnlySubstanceUnits="false" boundaryCondition="false" constant="false">
        <notes>
          <body xmlns="http://www.w3.org/1999/xhtml">
            <p>FORMULA: C28H44O3</p>
            <p>CHARGE: 0</p>
          </body>
        </notes>
      </species>
      <species id="M_2425dhvitd3_c" name="24R,25-Dihydroxyvitamin D3" compartment="c" hasOnlySubstanceUnits="false" boundaryCondition="false" constant="false">
        <notes>
          <body xmlns="http://www.w3.org/1999/xhtml">
            <p>FORMULA: C27H44O3</p>
            <p>CHARGE: 0</p>
          </body>
        </notes>
      </species>
      <species id="M_2425dhvitd3_e" name="24R,25-Dihydroxyvitamin D3" compartment="e" hasOnlySubstanceUnits="false" boundaryCondition="false" constant="false">
        <notes>
          <body xmlns="http://www.w3.org/1999/xhtml">
            <p>FORMULA: C27H44O3</p>
            <p>CHARGE: 0</p>
          </body>
        </notes>
      </species>
      <species id="M_24nph_c" name="2,4 dihydroxy nitrophenol" compartment="c" hasOnlySubstanceUnits="false" boundaryCondition="false" constant="false">
        <notes>
          <body xmlns="http://www.w3.org/1999/xhtml">
            <p>FORMULA: C6H5NO4</p>
            <p>CHARGE: 0</p>
          </body>
        </notes>
      </species>
      <species id="M_24nph_e" name="2,4 dihydroxy nitrophenol" compartment="e" hasOnlySubstanceUnits="false" boundaryCondition="false" constant="false">
        <notes>
          <body xmlns="http://www.w3.org/1999/xhtml">
            <p>FORMULA: C6H5NO4</p>
            <p>CHARGE: 0</p>
          </body>
        </notes>
      </species>
      <species id="M_25aics_c" name="(S)-2-[5-Amino-1-(5-phospho-D-ribosyl)imidazole-4-carboxamido]succinate" compartment="c" hasOnlySubstanceUnits="false" boundaryCondition="false" constant="false">
        <notes>
          <body xmlns="http://www.w3.org/1999/xhtml">
            <p>FORMULA: C13H15N4O12P</p>
            <p>CHARGE: 0</p>
          </body>
        </notes>
      </species>
      <species id="M_25hvitd2_c" name="25-Hydroxyvitamin D2" compartment="c" hasOnlySubstanceUnits="false" boundaryCondition="false" constant="false">
        <notes>
          <body xmlns="http://www.w3.org/1999/xhtml">
            <p>FORMULA: C28H44O2</p>
            <p>CHARGE: 0</p>
          </body>
        </notes>
      </species>
      <species id="M_25hvitd2_e" name="25-Hydroxyvitamin D2" compartment="e" hasOnlySubstanceUnits="false" boundaryCondition="false" constant="false">
        <notes>
          <body xmlns="http://www.w3.org/1999/xhtml">
            <p>FORMULA: C28H44O2</p>
            <p>CHARGE: 0</p>
          </body>
        </notes>
      </species>
      <species id="M_25hvitd3_c" name="25-Hydroxyvitamin D3" compartment="c" hasOnlySubstanceUnits="false" boundaryCondition="false" constant="false">
        <notes>
          <body xmlns="http://www.w3.org/1999/xhtml">
            <p>FORMULA: C27H44O2</p>
            <p>CHARGE: 0</p>
          </body>
        </notes>
      </species>
      <species id="M_25hvitd3_e" name="25-Hydroxyvitamin D3" compartment="e" hasOnlySubstanceUnits="false" boundaryCondition="false" constant="false">
        <notes>
          <body xmlns="http://www.w3.org/1999/xhtml">
            <p>FORMULA: C27H44O2</p>
            <p>CHARGE: 0</p>
          </body>
        </notes>
      </species>
      <species id="M_2amac_c" name="2-Aminoacrylate" compartment="c" hasOnlySubstanceUnits="false" boundaryCondition="false" constant="false">
        <notes>
          <body xmlns="http://www.w3.org/1999/xhtml">
            <p>FORMULA: C3H5NO2</p>
            <p>CHARGE: 0</p>
          </body>
        </notes>
      </species>
      <species id="M_2ameph_c" name="(2-Aminoethyl)phosphonate" compartment="c" hasOnlySubstanceUnits="false" boundaryCondition="false" constant="false">
        <notes>
          <body xmlns="http://www.w3.org/1999/xhtml">
            <p>FORMULA: C2H7NO3P</p>
            <p>CHARGE: 0</p>
          </body>
        </notes>
      </species>
      <species id="M_2aobut_c" name="L-2-Amino-3-oxobutanoate" compartment="c" hasOnlySubstanceUnits="false" boundaryCondition="false" constant="false">
        <notes>
          <body xmlns="http://www.w3.org/1999/xhtml">
            <p>FORMULA: C4H7NO3</p>
            <p>CHARGE: 0</p>
          </body>
        </notes>
      </species>
      <species id="M_2c23dh56dhoxin_c" name="2-Carboxy-2,3-dihydro-5,6-dihydroxyindole" compartment="c" hasOnlySubstanceUnits="false" boundaryCondition="false" constant="false">
        <notes>
          <body xmlns="http://www.w3.org/1999/xhtml">
            <p>FORMULA: C9H8NO4</p>
            <p>CHARGE: 0</p>
          </body>
        </notes>
      </species>
      <species id="M_2coum_c" name="cis-2-Hydroxy cinnamate" compartment="c" hasOnlySubstanceUnits="false" boundaryCondition="false" constant="false">
        <notes>
          <body xmlns="http://www.w3.org/1999/xhtml">
            <p>FORMULA: C9H7O3</p>
            <p>CHARGE: 0</p>
          </body>
        </notes>
      </species>
      <species id="M_2dp6mep_c" name="2-Decaprenyl-6-methoxyphenol" compartment="c" hasOnlySubstanceUnits="false" boundaryCondition="false" constant="false">
        <notes>
          <body xmlns="http://www.w3.org/1999/xhtml">
            <p>FORMULA: C57H88O2</p>
            <p>CHARGE: 0</p>
          </body>
        </notes>
      </species>
      <species id="M_2dp6mobq_c" name="2-Decaprenyl-6-methoxy-1,4-benzoquinone" compartment="c" hasOnlySubstanceUnits="false" boundaryCondition="false" constant="false">
        <notes>
          <body xmlns="http://www.w3.org/1999/xhtml">
            <p>FORMULA: C57H86O3</p>
            <p>CHARGE: 0</p>
          </body>
        </notes>
      </species>
      <species id="M_2dp6mobq_me_c" name="2-Decaprenyl-3-methyl-6-methoxy-1,4-benzoquinone" compartment="c" hasOnlySubstanceUnits="false" boundaryCondition="false" constant="false">
        <notes>
          <body xmlns="http://www.w3.org/1999/xhtml">
            <p>FORMULA: C58H88O3</p>
            <p>CHARGE: 0</p>
          </body>
        </notes>
      </species>
      <species id="M_2dpmhobq_c" name="2-Decaprenyl-3-methyl-5-hydroxy-6-methoxy-1,4-benzoquinone" compartment="c" hasOnlySubstanceUnits="false" boundaryCondition="false" constant="false">
        <notes>
          <body xmlns="http://www.w3.org/1999/xhtml">
            <p>FORMULA: C58H88O4</p>
            <p>CHARGE: 0</p>
          </body>
        </notes>
      </species>
      <species id="M_2dr1p_c" name="2-Deoxy-D-ribose 1-phosphate" compartment="c" hasOnlySubstanceUnits="false" boundaryCondition="false" constant="false">
        <notes>
          <body xmlns="http://www.w3.org/1999/xhtml">
            <p>FORMULA: C5H9O7P</p>
            <p>CHARGE: 0</p>
          </body>
        </notes>
      </species>
      <species id="M_2dr5p_c" name="2-Deoxy-D-ribose 5-phosphate" compartment="c" hasOnlySubstanceUnits="false" boundaryCondition="false" constant="false">
        <notes>
          <body xmlns="http://www.w3.org/1999/xhtml">
            <p>FORMULA: C5H9O7P</p>
            <p>CHARGE: 0</p>
          </body>
        </notes>
      </species>
      <species id="M_2hb_c" name="2-Hydroxybutyrate" compartment="c" hasOnlySubstanceUnits="false" boundaryCondition="false" constant="false">
        <notes>
          <body xmlns="http://www.w3.org/1999/xhtml">
            <p>FORMULA: C4H7O3</p>
            <p>CHARGE: 0</p>
          </body>
        </notes>
      </species>
      <species id="M_2hb_e" name="2-Hydroxybutyrate" compartment="e" hasOnlySubstanceUnits="false" boundaryCondition="false" constant="false">
        <notes>
          <body xmlns="http://www.w3.org/1999/xhtml">
            <p>FORMULA: C4H7O3</p>
            <p>CHARGE: 0</p>
          </body>
        </notes>
      </species>
      <species id="M_2hyoxplac_c" name="2-Hydroxyphenylacetate" compartment="c" hasOnlySubstanceUnits="false" boundaryCondition="false" constant="false">
        <notes>
          <body xmlns="http://www.w3.org/1999/xhtml">
            <p>FORMULA: C8H7O3</p>
            <p>CHARGE: 0</p>
          </body>
        </notes>
      </species>
      <species id="M_2kmb_c" name="2-keto-4-methylthiobutyrate" compartment="c" hasOnlySubstanceUnits="false" boundaryCondition="false" constant="false">
        <notes>
          <body xmlns="http://www.w3.org/1999/xhtml">
            <p>FORMULA: C5H7O3S</p>
            <p>CHARGE: 0</p>
          </body>
        </notes>
      </species>
      <species id="M_2maacoa_c" name="2-Methyl-3-acetoacetyl-CoA" compartment="c" hasOnlySubstanceUnits="false" boundaryCondition="false" constant="false">
        <notes>
          <body xmlns="http://www.w3.org/1999/xhtml">
            <p>FORMULA: C26H38N7O18P3S</p>
            <p>CHARGE: 0</p>
          </body>
        </notes>
      </species>
      <species id="M_2mb2coa_c" name="trans-2-Methylbut-2-enoyl-CoA" compartment="c" hasOnlySubstanceUnits="false" boundaryCondition="false" constant="false">
        <notes>
          <body xmlns="http://www.w3.org/1999/xhtml">
            <p>FORMULA: C26H38N7O17P3S</p>
            <p>CHARGE: 0</p>
          </body>
        </notes>
      </species>
      <species id="M_2mbcoa_c" name="2-Methylbutanoyl-CoA" compartment="c" hasOnlySubstanceUnits="false" boundaryCondition="false" constant="false">
        <notes>
          <body xmlns="http://www.w3.org/1999/xhtml">
            <p>FORMULA: C26H40N7O17P3S</p>
            <p>CHARGE: 0</p>
          </body>
        </notes>
      </species>
      <species id="M_2mcacn_c" name="cis-2-Methylaconitate" compartment="c" hasOnlySubstanceUnits="false" boundaryCondition="false" constant="false">
        <notes>
          <body xmlns="http://www.w3.org/1999/xhtml">
            <p>FORMULA: C7H5O6</p>
            <p>CHARGE: 0</p>
          </body>
        </notes>
      </species>
      <species id="M_2mcit_c" name="2-Methylcitrate" compartment="c" hasOnlySubstanceUnits="false" boundaryCondition="false" constant="false">
        <notes>
          <body xmlns="http://www.w3.org/1999/xhtml">
            <p>FORMULA: C7H7O7</p>
            <p>CHARGE: 0</p>
          </body>
        </notes>
      </species>
      <species id="M_2mcit_e" name="2-Methylcitrate" compartment="e" hasOnlySubstanceUnits="false" boundaryCondition="false" constant="false">
        <notes>
          <body xmlns="http://www.w3.org/1999/xhtml">
            <p>FORMULA: C7H7O7</p>
            <p>CHARGE: 0</p>
          </body>
        </notes>
      </species>
      <species id="M_2mop_c" name="2-Methyl-3-oxopropanoate" compartment="c" hasOnlySubstanceUnits="false" boundaryCondition="false" constant="false">
        <notes>
          <body xmlns="http://www.w3.org/1999/xhtml">
            <p>FORMULA: C4H5O3</p>
            <p>CHARGE: 0</p>
          </body>
        </notes>
      </species>
      <species id="M_2mp2coa_c" name="2-Methylprop-2-enoyl-CoA" compartment="c" hasOnlySubstanceUnits="false" boundaryCondition="false" constant="false">
        <notes>
          <body xmlns="http://www.w3.org/1999/xhtml">
            <p>FORMULA: C25H36N7O17P3S</p>
            <p>CHARGE: 0</p>
          </body>
        </notes>
      </species>
      <species id="M_2obut_c" name="2-Oxobutanoate" compartment="c" hasOnlySubstanceUnits="false" boundaryCondition="false" constant="false">
        <notes>
          <body xmlns="http://www.w3.org/1999/xhtml">
            <p>FORMULA: C4H5O3</p>
            <p>CHARGE: 0</p>
          </body>
        </notes>
      </species>
      <species id="M_2oxoadp_c" name="2-Oxoadipate" compartment="c" hasOnlySubstanceUnits="false" boundaryCondition="false" constant="false">
        <notes>
          <body xmlns="http://www.w3.org/1999/xhtml">
            <p>FORMULA: C6H6O5</p>
            <p>CHARGE: 0</p>
          </body>
        </notes>
      </species>
      <species id="M_2pg_c" name="D-Glycerate 2-phosphate" compartment="c" hasOnlySubstanceUnits="false" boundaryCondition="false" constant="false">
        <notes>
          <body xmlns="http://www.w3.org/1999/xhtml">
            <p>FORMULA: C3H4O7P</p>
            <p>CHARGE: 0</p>
          </body>
        </notes>
      </species>
      <species id="M_34dhcinm_c" name="3,4-Dihydroxy-trans-cinnamate" compartment="c" hasOnlySubstanceUnits="false" boundaryCondition="false" constant="false">
        <notes>
          <body xmlns="http://www.w3.org/1999/xhtml">
            <p>FORMULA: C9H7O4</p>
            <p>CHARGE: 0</p>
          </body>
        </notes>
      </species>
      <species id="M_34dhmald_c" name="3,4-Dihydroxymandelaldehyde" compartment="c" hasOnlySubstanceUnits="false" boundaryCondition="false" constant="false">
        <notes>
          <body xmlns="http://www.w3.org/1999/xhtml">
            <p>FORMULA: C8H8O4</p>
            <p>CHARGE: 0</p>
          </body>
        </notes>
      </species>
      <species id="M_34dhoxmand_c" name="3,4-Dihydroxymandelate" compartment="c" hasOnlySubstanceUnits="false" boundaryCondition="false" constant="false">
        <notes>
          <body xmlns="http://www.w3.org/1999/xhtml">
            <p>FORMULA: C8H7O5</p>
            <p>CHARGE: 0</p>
          </body>
        </notes>
      </species>
      <species id="M_34dhoxpeg_c" name="3,4-Dihydroxyphenylethyleneglycol" compartment="c" hasOnlySubstanceUnits="false" boundaryCondition="false" constant="false">
        <notes>
          <body xmlns="http://www.w3.org/1999/xhtml">
            <p>FORMULA: C8H10O4</p>
            <p>CHARGE: 0</p>
          </body>
        </notes>
      </species>
      <species id="M_34dhoxpeg_e" name="3,4-Dihydroxyphenylethyleneglycol" compartment="e" hasOnlySubstanceUnits="false" boundaryCondition="false" constant="false">
        <notes>
          <body xmlns="http://www.w3.org/1999/xhtml">
            <p>FORMULA: C8H10O4</p>
            <p>CHARGE: 0</p>
          </body>
        </notes>
      </species>
      <species id="M_34dhpac_c" name="3,4-Dihydroxyphenylacetaldehyde" compartment="c" hasOnlySubstanceUnits="false" boundaryCondition="false" constant="false">
        <notes>
          <body xmlns="http://www.w3.org/1999/xhtml">
            <p>FORMULA: C8H8O3</p>
            <p>CHARGE: 0</p>
          </body>
        </notes>
      </species>
      <species id="M_34dhpha_c" name="3,4-Dihydroxyphenylacetate" compartment="c" hasOnlySubstanceUnits="false" boundaryCondition="false" constant="false">
        <notes>
          <body xmlns="http://www.w3.org/1999/xhtml">
            <p>FORMULA: C8H7O4</p>
            <p>CHARGE: 0</p>
          </body>
        </notes>
      </species>
      <species id="M_34dhphe_c" name="3,4-Dihydroxy-L-phenylalanine" compartment="c" hasOnlySubstanceUnits="false" boundaryCondition="false" constant="false">
        <notes>
          <body xmlns="http://www.w3.org/1999/xhtml">
            <p>FORMULA: C9H11NO4</p>
            <p>CHARGE: 0</p>
          </body>
        </notes>
      </species>
      <species id="M_34dhphe_e" name="3,4-Dihydroxy-L-phenylalanine" compartment="e" hasOnlySubstanceUnits="false" boundaryCondition="false" constant="false">
        <notes>
          <body xmlns="http://www.w3.org/1999/xhtml">
            <p>FORMULA: C9H11NO4</p>
            <p>CHARGE: 0</p>
          </body>
        </notes>
      </species>
      <species id="M_34hpl_c" name="3-(4-Hydroxyphenyl)lactate" compartment="c" hasOnlySubstanceUnits="false" boundaryCondition="false" constant="false">
        <notes>
          <body xmlns="http://www.w3.org/1999/xhtml">
            <p>FORMULA: C9H9O4</p>
            <p>CHARGE: 0</p>
          </body>
        </notes>
      </species>
      <species id="M_34hpp_c" name="3-(4-Hydroxyphenyl)pyruvate" compartment="c" hasOnlySubstanceUnits="false" boundaryCondition="false" constant="false">
        <notes>
          <body xmlns="http://www.w3.org/1999/xhtml">
            <p>FORMULA: C9H7O4</p>
            <p>CHARGE: 0</p>
          </body>
        </notes>
      </species>
      <species id="M_35cgmp_c" name="3&apos;,5&apos;-Cyclic GMP" compartment="c" hasOnlySubstanceUnits="false" boundaryCondition="false" constant="false">
        <notes>
          <body xmlns="http://www.w3.org/1999/xhtml">
            <p>FORMULA: C10H11N5O7P</p>
            <p>CHARGE: 0</p>
          </body>
        </notes>
      </species>
      <species id="M_35cgmp_e" name="3&apos;,5&apos;-Cyclic GMP" compartment="e" hasOnlySubstanceUnits="false" boundaryCondition="false" constant="false">
        <notes>
          <body xmlns="http://www.w3.org/1999/xhtml">
            <p>FORMULA: C10H11N5O7P</p>
            <p>CHARGE: 0</p>
          </body>
        </notes>
      </species>
      <species id="M_35diotyr_c" name="3,5-Diiodo-L-tyrosine" compartment="c" hasOnlySubstanceUnits="false" boundaryCondition="false" constant="false">
        <notes>
          <body xmlns="http://www.w3.org/1999/xhtml">
            <p>FORMULA: C9H9I2NO3</p>
            <p>CHARGE: 0</p>
          </body>
        </notes>
      </species>
      <species id="M_3aib_DASH_D_c" name="D-3-Amino-isobutanoate" compartment="c" hasOnlySubstanceUnits="false" boundaryCondition="false" constant="false">
        <notes>
          <body xmlns="http://www.w3.org/1999/xhtml">
            <p>FORMULA: C4H9NO2</p>
            <p>CHARGE: 0</p>
          </body>
        </notes>
      </species>
      <species id="M_3aib_DASH_D_e" name="D-3-Amino-isobutanoate" compartment="e" hasOnlySubstanceUnits="false" boundaryCondition="false" constant="false">
        <notes>
          <body xmlns="http://www.w3.org/1999/xhtml">
            <p>FORMULA: C4H9NO2</p>
            <p>CHARGE: 0</p>
          </body>
        </notes>
      </species>
      <species id="M_3aib_c" name="L-3-Amino-isobutanoate" compartment="c" hasOnlySubstanceUnits="false" boundaryCondition="false" constant="false">
        <notes>
          <body xmlns="http://www.w3.org/1999/xhtml">
            <p>FORMULA: C4H9NO2</p>
            <p>CHARGE: 0</p>
          </body>
        </notes>
      </species>
      <species id="M_3aib_e" name="L-3-Amino-isobutanoate" compartment="e" hasOnlySubstanceUnits="false" boundaryCondition="false" constant="false">
        <notes>
          <body xmlns="http://www.w3.org/1999/xhtml">
            <p>FORMULA: C4H9NO2</p>
            <p>CHARGE: 0</p>
          </body>
        </notes>
      </species>
      <species id="M_3amp_c" name="3&apos;-AMP" compartment="c" hasOnlySubstanceUnits="false" boundaryCondition="false" constant="false">
        <notes>
          <body xmlns="http://www.w3.org/1999/xhtml">
            <p>FORMULA: C10H12N5O7P</p>
            <p>CHARGE: 0</p>
          </body>
        </notes>
      </species>
      <species id="M_3dhguln_c" name="3-Dehydro-L-gulonate" compartment="c" hasOnlySubstanceUnits="false" boundaryCondition="false" constant="false">
        <notes>
          <body xmlns="http://www.w3.org/1999/xhtml">
            <p>FORMULA: C6H9O7</p>
            <p>CHARGE: 0</p>
          </body>
        </notes>
      </species>
      <species id="M_3dpdhb_c" name="3-Decaprenyl-4,5-dihdydroxybenzoate" compartment="c" hasOnlySubstanceUnits="false" boundaryCondition="false" constant="false">
        <notes>
          <body xmlns="http://www.w3.org/1999/xhtml">
            <p>FORMULA: C57H85O4</p>
            <p>CHARGE: 0</p>
          </body>
        </notes>
      </species>
      <species id="M_3dpdhb_me_c" name="3-Decaprenyl-4-hydroxy-5-methoxybenzoate" compartment="c" hasOnlySubstanceUnits="false" boundaryCondition="false" constant="false">
        <notes>
          <body xmlns="http://www.w3.org/1999/xhtml">
            <p>FORMULA: C58H87O4</p>
            <p>CHARGE: 0</p>
          </body>
        </notes>
      </species>
      <species id="M_3dphb_c" name="3-Decaprenyl-4-hydroxybenzoate" compartment="c" hasOnlySubstanceUnits="false" boundaryCondition="false" constant="false">
        <notes>
          <body xmlns="http://www.w3.org/1999/xhtml">
            <p>FORMULA: C57H85O3</p>
            <p>CHARGE: 0</p>
          </body>
        </notes>
      </species>
      <species id="M_3dsphgn_c" name="3-Dehydrosphinganine" compartment="c" hasOnlySubstanceUnits="false" boundaryCondition="false" constant="false">
        <notes>
          <body xmlns="http://www.w3.org/1999/xhtml">
            <p>FORMULA: C18H38NO2</p>
            <p>CHARGE: 0</p>
          </body>
        </notes>
      </species>
      <species id="M_3h26dm5coa_c" name="3-Hydroxy-2,6-dimethyl-5-methylene-heptanoyl-CoA" compartment="c" hasOnlySubstanceUnits="false" boundaryCondition="false" constant="false">
        <notes>
          <body xmlns="http://www.w3.org/1999/xhtml">
            <p>FORMULA: C31H48N7O18P3S</p>
            <p>CHARGE: 0</p>
          </body>
        </notes>
      </species>
      <species id="M_3hanthrn_c" name="3-Hydroxyanthranilate" compartment="c" hasOnlySubstanceUnits="false" boundaryCondition="false" constant="false">
        <notes>
          <body xmlns="http://www.w3.org/1999/xhtml">
            <p>FORMULA: C7H7NO3</p>
            <p>CHARGE: 0</p>
          </body>
        </notes>
      </species>
      <species id="M_3hbcoa_DASH_R_c" name="(R)-3-Hydroxybutanoyl-CoA" compartment="c" hasOnlySubstanceUnits="false" boundaryCondition="false" constant="false">
        <notes>
          <body xmlns="http://www.w3.org/1999/xhtml">
            <p>FORMULA: C25H38N7O18P3S</p>
            <p>CHARGE: 0</p>
          </body>
        </notes>
      </species>
      <species id="M_3hbcoa_c" name="(S)-3-Hydroxybutanoyl-CoA" compartment="c" hasOnlySubstanceUnits="false" boundaryCondition="false" constant="false">
        <notes>
          <body xmlns="http://www.w3.org/1999/xhtml">
            <p>FORMULA: C25H38N7O18P3S</p>
            <p>CHARGE: 0</p>
          </body>
        </notes>
      </species>
      <species id="M_3hibutcoa_c" name="(S)-3-Hydroxyisobutyryl-CoA" compartment="c" hasOnlySubstanceUnits="false" boundaryCondition="false" constant="false">
        <notes>
          <body xmlns="http://www.w3.org/1999/xhtml">
            <p>FORMULA: C25H38N7O18P3S</p>
            <p>CHARGE: 0</p>
          </body>
        </notes>
      </species>
      <species id="M_3hmbcoa_c" name="(S)-3-Hydroxy-2-methylbutyryl-CoA" compartment="c" hasOnlySubstanceUnits="false" boundaryCondition="false" constant="false">
        <notes>
          <body xmlns="http://www.w3.org/1999/xhtml">
            <p>FORMULA: C26H40N7O18P3S</p>
            <p>CHARGE: 0</p>
          </body>
        </notes>
      </species>
      <species id="M_3hmp_c" name="3-Hydroxy-2-methylpropanoate" compartment="c" hasOnlySubstanceUnits="false" boundaryCondition="false" constant="false">
        <notes>
          <body xmlns="http://www.w3.org/1999/xhtml">
            <p>FORMULA: C4H7O3</p>
            <p>CHARGE: 0</p>
          </body>
        </notes>
      </species>
      <species id="M_3hpcoa_c" name="3-Hydroxypropionyl-CoA" compartment="c" hasOnlySubstanceUnits="false" boundaryCondition="false" constant="false">
        <notes>
          <body xmlns="http://www.w3.org/1999/xhtml">
            <p>FORMULA: C24H36N7O18P3S</p>
            <p>CHARGE: 0</p>
          </body>
        </notes>
      </species>
      <species id="M_3hpp_c" name="3-Hydroxypropanoate" compartment="c" hasOnlySubstanceUnits="false" boundaryCondition="false" constant="false">
        <notes>
          <body xmlns="http://www.w3.org/1999/xhtml">
            <p>FORMULA: C3H5O3</p>
            <p>CHARGE: 0</p>
          </body>
        </notes>
      </species>
      <species id="M_3htmelys_c" name="3-Hydroxy-N6,N6,N6-trimethyl-L-lysine" compartment="c" hasOnlySubstanceUnits="false" boundaryCondition="false" constant="false">
        <notes>
          <body xmlns="http://www.w3.org/1999/xhtml">
            <p>FORMULA: C9H20N2O3</p>
            <p>CHARGE: 0</p>
          </body>
        </notes>
      </species>
      <species id="M_3hxkynam_c" name="3-Hydroxykynurenamine" compartment="c" hasOnlySubstanceUnits="false" boundaryCondition="false" constant="false">
        <notes>
          <body xmlns="http://www.w3.org/1999/xhtml">
            <p>FORMULA: C9H13N2O2</p>
            <p>CHARGE: 0</p>
          </body>
        </notes>
      </species>
      <species id="M_3ityr_DASH_L_c" name="3-Iodo-L-tyrosine" compartment="c" hasOnlySubstanceUnits="false" boundaryCondition="false" constant="false">
        <notes>
          <body xmlns="http://www.w3.org/1999/xhtml">
            <p>FORMULA: C9H10INO3</p>
            <p>CHARGE: 0</p>
          </body>
        </notes>
      </species>
      <species id="M_3m4hpga_c" name="3-Methoxy-4-hydroxyphenylglycolaldehyde" compartment="c" hasOnlySubstanceUnits="false" boundaryCondition="false" constant="false">
        <notes>
          <body xmlns="http://www.w3.org/1999/xhtml">
            <p>FORMULA: C9H10O4</p>
            <p>CHARGE: 0</p>
          </body>
        </notes>
      </species>
      <species id="M_3mb2coa_c" name="3-Methylbut-2-enoyl-CoA" compartment="c" hasOnlySubstanceUnits="false" boundaryCondition="false" constant="false">
        <notes>
          <body xmlns="http://www.w3.org/1999/xhtml">
            <p>FORMULA: C26H38N7O17P3S</p>
            <p>CHARGE: 0</p>
          </body>
        </notes>
      </species>
      <species id="M_3mgcoa_c" name="3-Methylglutaconyl-CoA" compartment="c" hasOnlySubstanceUnits="false" boundaryCondition="false" constant="false">
        <notes>
          <body xmlns="http://www.w3.org/1999/xhtml">
            <p>FORMULA: C27H37N7O19P3S</p>
            <p>CHARGE: 0</p>
          </body>
        </notes>
      </species>
      <species id="M_3mlda_c" name="3-Methylimidazoleacetic acid" compartment="c" hasOnlySubstanceUnits="false" boundaryCondition="false" constant="false">
        <notes>
          <body xmlns="http://www.w3.org/1999/xhtml">
            <p>FORMULA: C6H7N2O2</p>
            <p>CHARGE: 0</p>
          </body>
        </notes>
      </species>
      <species id="M_3mlda_e" name="3-Methylimidazoleacetic acid" compartment="e" hasOnlySubstanceUnits="false" boundaryCondition="false" constant="false">
        <notes>
          <body xmlns="http://www.w3.org/1999/xhtml">
            <p>FORMULA: C6H7N2O2</p>
            <p>CHARGE: 0</p>
          </body>
        </notes>
      </species>
      <species id="M_3mldz_c" name="3-Methylimidazole acetaldehyde" compartment="c" hasOnlySubstanceUnits="false" boundaryCondition="false" constant="false">
        <notes>
          <body xmlns="http://www.w3.org/1999/xhtml">
            <p>FORMULA: C6H8N2O</p>
            <p>CHARGE: 0</p>
          </body>
        </notes>
      </species>
      <species id="M_3mob_c" name="3-Methyl-2-oxobutanoate" compartment="c" hasOnlySubstanceUnits="false" boundaryCondition="false" constant="false">
        <notes>
          <body xmlns="http://www.w3.org/1999/xhtml">
            <p>FORMULA: C5H7O3</p>
            <p>CHARGE: 0</p>
          </body>
        </notes>
      </species>
      <species id="M_3mop_c" name="(S)-3-Methyl-2-oxopentanoate" compartment="c" hasOnlySubstanceUnits="false" boundaryCondition="false" constant="false">
        <notes>
          <body xmlns="http://www.w3.org/1999/xhtml">
            <p>FORMULA: C6H9O3</p>
            <p>CHARGE: 0</p>
          </body>
        </notes>
      </species>
      <species id="M_3mox4hoxm_c" name="3-Methoxy-4-hydroxymandelate" compartment="c" hasOnlySubstanceUnits="false" boundaryCondition="false" constant="false">
        <notes>
          <body xmlns="http://www.w3.org/1999/xhtml">
            <p>FORMULA: C9H9O5</p>
            <p>CHARGE: 0</p>
          </body>
        </notes>
      </species>
      <species id="M_3mox4hpac_c" name="3-Methoxy-4-hydroxyphenylacetaldehyde" compartment="c" hasOnlySubstanceUnits="false" boundaryCondition="false" constant="false">
        <notes>
          <body xmlns="http://www.w3.org/1999/xhtml">
            <p>FORMULA: C9H10O3</p>
            <p>CHARGE: 0</p>
          </body>
        </notes>
      </species>
      <species id="M_3moxtyr_c" name="3-Methoxytyramine" compartment="c" hasOnlySubstanceUnits="false" boundaryCondition="false" constant="false">
        <notes>
          <body xmlns="http://www.w3.org/1999/xhtml">
            <p>FORMULA: C9H14NO2</p>
            <p>CHARGE: 0</p>
          </body>
        </notes>
      </species>
      <species id="M_3odcoa_c" name="3-Oxodecanoyl-CoA" compartment="c" hasOnlySubstanceUnits="false" boundaryCondition="false" constant="false">
        <notes>
          <body xmlns="http://www.w3.org/1999/xhtml">
            <p>FORMULA: C31H48N7O18P3S</p>
            <p>CHARGE: 0</p>
          </body>
        </notes>
      </species>
      <species id="M_3oddcoa_c" name="3-Oxododecanoyl-CoA" compartment="c" hasOnlySubstanceUnits="false" boundaryCondition="false" constant="false">
        <notes>
          <body xmlns="http://www.w3.org/1999/xhtml">
            <p>FORMULA: C33H52N7O18P3S</p>
            <p>CHARGE: 0</p>
          </body>
        </notes>
      </species>
      <species id="M_3ohdcoa_c" name="3-Oxohexadecanoyl-CoA" compartment="c" hasOnlySubstanceUnits="false" boundaryCondition="false" constant="false">
        <notes>
          <body xmlns="http://www.w3.org/1999/xhtml">
            <p>FORMULA: C37H60N7O18P3S</p>
            <p>CHARGE: 0</p>
          </body>
        </notes>
      </species>
      <species id="M_3ohodcoa_c" name="3-Oxooctadecanoyl-CoA" compartment="c" hasOnlySubstanceUnits="false" boundaryCondition="false" constant="false">
        <notes>
          <body xmlns="http://www.w3.org/1999/xhtml">
            <p>FORMULA: C39H64N7O18P3S</p>
            <p>CHARGE: 0</p>
          </body>
        </notes>
      </species>
      <species id="M_3ohxccoa_c" name="3-Oxohexacosyl-CoA" compartment="c" hasOnlySubstanceUnits="false" boundaryCondition="false" constant="false">
        <notes>
          <body xmlns="http://www.w3.org/1999/xhtml">
            <p>FORMULA: C47H80N7O18P3S</p>
            <p>CHARGE: 0</p>
          </body>
        </notes>
      </species>
      <species id="M_3otdcoa_c" name="3-Oxotetradecanoyl-CoA" compartment="c" hasOnlySubstanceUnits="false" boundaryCondition="false" constant="false">
        <notes>
          <body xmlns="http://www.w3.org/1999/xhtml">
            <p>FORMULA: C35H56N7O18P3S</p>
            <p>CHARGE: 0</p>
          </body>
        </notes>
      </species>
      <species id="M_3padsel_c" name="3&apos;-Phosphoadenylylselenate" compartment="c" hasOnlySubstanceUnits="false" boundaryCondition="false" constant="false">
        <notes>
          <body xmlns="http://www.w3.org/1999/xhtml">
            <p>FORMULA: C10H11N5O13P2Se</p>
            <p>CHARGE: 0</p>
          </body>
        </notes>
      </species>
      <species id="M_3pg_c" name="3-Phospho-D-glycerate" compartment="c" hasOnlySubstanceUnits="false" boundaryCondition="false" constant="false">
        <notes>
          <body xmlns="http://www.w3.org/1999/xhtml">
            <p>FORMULA: C3H4O7P</p>
            <p>CHARGE: 0</p>
          </body>
        </notes>
      </species>
      <species id="M_3php_c" name="3-Phosphohydroxypyruvate" compartment="c" hasOnlySubstanceUnits="false" boundaryCondition="false" constant="false">
        <notes>
          <body xmlns="http://www.w3.org/1999/xhtml">
            <p>FORMULA: C3H2O7P</p>
            <p>CHARGE: 0</p>
          </body>
        </notes>
      </species>
      <species id="M_3sala_c" name="3-Sulfino-L-alanine" compartment="c" hasOnlySubstanceUnits="false" boundaryCondition="false" constant="false">
        <notes>
          <body xmlns="http://www.w3.org/1999/xhtml">
            <p>FORMULA: C3H5NO4S</p>
            <p>CHARGE: 0</p>
          </body>
        </notes>
      </species>
      <species id="M_3snpyr_c" name="3-Sulfinopyruvate" compartment="c" hasOnlySubstanceUnits="false" boundaryCondition="false" constant="false">
        <notes>
          <body xmlns="http://www.w3.org/1999/xhtml">
            <p>FORMULA: C3H2O5S</p>
            <p>CHARGE: 0</p>
          </body>
        </notes>
      </species>
      <species id="M_3spyr_c" name="3-Sulfopyruvate" compartment="c" hasOnlySubstanceUnits="false" boundaryCondition="false" constant="false">
        <notes>
          <body xmlns="http://www.w3.org/1999/xhtml">
            <p>FORMULA: C3H2O6S</p>
            <p>CHARGE: 0</p>
          </body>
        </notes>
      </species>
      <species id="M_3uib_c" name="3-Ureidoisobutyrate" compartment="c" hasOnlySubstanceUnits="false" boundaryCondition="false" constant="false">
        <notes>
          <body xmlns="http://www.w3.org/1999/xhtml">
            <p>FORMULA: C5H9N2O3</p>
            <p>CHARGE: 0</p>
          </body>
        </notes>
      </species>
      <species id="M_42A3HP24DB_c" name="4-(2-Amino-3-hydroxyphenyl)-2,4-dioxobutanoate" compartment="c" hasOnlySubstanceUnits="false" boundaryCondition="false" constant="false">
        <notes>
          <body xmlns="http://www.w3.org/1999/xhtml">
            <p>FORMULA: C10H8NO5</p>
            <p>CHARGE: 0</p>
          </body>
        </notes>
      </species>
      <species id="M_44mctr_c" name="4,4-dimethylcholesta-8,14,24-trienol" compartment="c" hasOnlySubstanceUnits="false" boundaryCondition="false" constant="false">
        <notes>
          <body xmlns="http://www.w3.org/1999/xhtml">
            <p>FORMULA: C29H46O</p>
            <p>CHARGE: 0</p>
          </body>
        </notes>
      </species>
      <species id="M_44mzym_c" name="4,4-dimethylzymosterol" compartment="c" hasOnlySubstanceUnits="false" boundaryCondition="false" constant="false">
        <notes>
          <body xmlns="http://www.w3.org/1999/xhtml">
            <p>FORMULA: C29H48O</p>
            <p>CHARGE: 0</p>
          </body>
        </notes>
      </species>
      <species id="M_46dhoxquin_c" name="4,6-Dihydroxyquinoline" compartment="c" hasOnlySubstanceUnits="false" boundaryCondition="false" constant="false">
        <notes>
          <body xmlns="http://www.w3.org/1999/xhtml">
            <p>FORMULA: C9H7NO2</p>
            <p>CHARGE: 0</p>
          </body>
        </notes>
      </species>
      <species id="M_48dhoxquin_c" name="4,8-Dihydroxyquinoline" compartment="c" hasOnlySubstanceUnits="false" boundaryCondition="false" constant="false">
        <notes>
          <body xmlns="http://www.w3.org/1999/xhtml">
            <p>FORMULA: C9H7NO2</p>
            <p>CHARGE: 0</p>
          </body>
        </notes>
      </species>
      <species id="M_4aabutn_c" name="4-Acetamidobutanoate" compartment="c" hasOnlySubstanceUnits="false" boundaryCondition="false" constant="false">
        <notes>
          <body xmlns="http://www.w3.org/1999/xhtml">
            <p>FORMULA: C6H10NO3</p>
            <p>CHARGE: 0</p>
          </body>
        </notes>
      </species>
      <species id="M_4abut_c" name="4-Aminobutanoate" compartment="c" hasOnlySubstanceUnits="false" boundaryCondition="false" constant="false">
        <notes>
          <body xmlns="http://www.w3.org/1999/xhtml">
            <p>FORMULA: C4H9NO2</p>
            <p>CHARGE: 0</p>
          </body>
        </notes>
      </species>
      <species id="M_4abut_e" name="4-Aminobutanoate" compartment="e" hasOnlySubstanceUnits="false" boundaryCondition="false" constant="false">
        <notes>
          <body xmlns="http://www.w3.org/1999/xhtml">
            <p>FORMULA: C4H9NO2</p>
            <p>CHARGE: 0</p>
          </body>
        </notes>
      </species>
      <species id="M_4abutn_c" name="4-Aminobutanal" compartment="c" hasOnlySubstanceUnits="false" boundaryCondition="false" constant="false">
        <notes>
          <body xmlns="http://www.w3.org/1999/xhtml">
            <p>FORMULA: C4H10NO</p>
            <p>CHARGE: 0</p>
          </body>
        </notes>
      </species>
      <species id="M_4aphdob_c" name="4-(2-Aminophenyl)-2,4-dioxobutanoate" compartment="c" hasOnlySubstanceUnits="false" boundaryCondition="false" constant="false">
        <notes>
          <body xmlns="http://www.w3.org/1999/xhtml">
            <p>FORMULA: C10H8NO4</p>
            <p>CHARGE: 0</p>
          </body>
        </notes>
      </species>
      <species id="M_4fumacac_c" name="4-Fumarylacetoacetate" compartment="c" hasOnlySubstanceUnits="false" boundaryCondition="false" constant="false">
        <notes>
          <body xmlns="http://www.w3.org/1999/xhtml">
            <p>FORMULA: C8H6O6</p>
            <p>CHARGE: 0</p>
          </body>
        </notes>
      </species>
      <species id="M_4h2oglt_c" name="4-Hydroxy-2-oxoglutarate" compartment="c" hasOnlySubstanceUnits="false" boundaryCondition="false" constant="false">
        <notes>
          <body xmlns="http://www.w3.org/1999/xhtml">
            <p>FORMULA: C5H4O6</p>
            <p>CHARGE: 0</p>
          </body>
        </notes>
      </species>
      <species id="M_4hbz_c" name="4-Hydroxybenzoate" compartment="c" hasOnlySubstanceUnits="false" boundaryCondition="false" constant="false">
        <notes>
          <body xmlns="http://www.w3.org/1999/xhtml">
            <p>FORMULA: C7H5O3</p>
            <p>CHARGE: 0</p>
          </body>
        </notes>
      </species>
      <species id="M_4hbzcoa_c" name="4-hydroxybenoyl-CoA" compartment="c" hasOnlySubstanceUnits="false" boundaryCondition="false" constant="false">
        <notes>
          <body xmlns="http://www.w3.org/1999/xhtml">
            <p>FORMULA: C28H36N7O18P3S</p>
            <p>CHARGE: 0</p>
          </body>
        </notes>
      </species>
      <species id="M_4hdebrisoquine_c" name="4 hydroxy debrisoquine" compartment="c" hasOnlySubstanceUnits="false" boundaryCondition="false" constant="false">
        <notes>
          <body xmlns="http://www.w3.org/1999/xhtml">
            <p>FORMULA: C10H14N3O</p>
            <p>CHARGE: 0</p>
          </body>
        </notes>
      </species>
      <species id="M_4hdebrisoquine_e" name="4 hydroxy debrisoquine" compartment="e" hasOnlySubstanceUnits="false" boundaryCondition="false" constant="false">
        <notes>
          <body xmlns="http://www.w3.org/1999/xhtml">
            <p>FORMULA: C10H14N3O</p>
            <p>CHARGE: 0</p>
          </body>
        </notes>
      </species>
      <species id="M_4hglusa_c" name="L-4-Hydroxyglutamate semialdehyde" compartment="c" hasOnlySubstanceUnits="false" boundaryCondition="false" constant="false">
        <notes>
          <body xmlns="http://www.w3.org/1999/xhtml">
            <p>FORMULA: C5H9NO4</p>
            <p>CHARGE: 0</p>
          </body>
        </notes>
      </species>
      <species id="M_4hoxpacd_c" name="4-Hydroxyphenylacetaldehyde" compartment="c" hasOnlySubstanceUnits="false" boundaryCondition="false" constant="false">
        <notes>
          <body xmlns="http://www.w3.org/1999/xhtml">
            <p>FORMULA: C8H8O2</p>
            <p>CHARGE: 0</p>
          </body>
        </notes>
      </species>
      <species id="M_4hphac_c" name="4-Hydroxyphenylacetate" compartment="c" hasOnlySubstanceUnits="false" boundaryCondition="false" constant="false">
        <notes>
          <body xmlns="http://www.w3.org/1999/xhtml">
            <p>FORMULA: C8H7O3</p>
            <p>CHARGE: 0</p>
          </body>
        </notes>
      </species>
      <species id="M_4hphac_e" name="4-Hydroxyphenylacetate" compartment="e" hasOnlySubstanceUnits="false" boundaryCondition="false" constant="false">
        <notes>
          <body xmlns="http://www.w3.org/1999/xhtml">
            <p>FORMULA: C8H7O3</p>
            <p>CHARGE: 0</p>
          </body>
        </notes>
      </species>
      <species id="M_4hpro_DASH_LT_c" name="trans-4-Hydroxy-L-proline" compartment="c" hasOnlySubstanceUnits="false" boundaryCondition="false" constant="false">
        <notes>
          <body xmlns="http://www.w3.org/1999/xhtml">
            <p>FORMULA: C5H9NO3</p>
            <p>CHARGE: 0</p>
          </body>
        </notes>
      </species>
      <species id="M_4izp_c" name="4-Imidazolone-5-propanoate" compartment="c" hasOnlySubstanceUnits="false" boundaryCondition="false" constant="false">
        <notes>
          <body xmlns="http://www.w3.org/1999/xhtml">
            <p>FORMULA: C6H7N2O3</p>
            <p>CHARGE: 0</p>
          </body>
        </notes>
      </species>
      <species id="M_4mlacac_c" name="4-Maleylacetoacetate" compartment="c" hasOnlySubstanceUnits="false" boundaryCondition="false" constant="false">
        <notes>
          <body xmlns="http://www.w3.org/1999/xhtml">
            <p>FORMULA: C8H6O6</p>
            <p>CHARGE: 0</p>
          </body>
        </notes>
      </species>
      <species id="M_4mop_c" name="4-Methyl-2-oxopentanoate" compartment="c" hasOnlySubstanceUnits="false" boundaryCondition="false" constant="false">
        <notes>
          <body xmlns="http://www.w3.org/1999/xhtml">
            <p>FORMULA: C6H9O3</p>
            <p>CHARGE: 0</p>
          </body>
        </notes>
      </species>
      <species id="M_4mptnl_c" name="4-Methylpentanal" compartment="c" hasOnlySubstanceUnits="false" boundaryCondition="false" constant="false">
        <notes>
          <body xmlns="http://www.w3.org/1999/xhtml">
            <p>FORMULA: C6H12O</p>
            <p>CHARGE: 0</p>
          </body>
        </notes>
      </species>
      <species id="M_4mtolbutamide_c" name="4 hydroxy tolbutamide" compartment="c" hasOnlySubstanceUnits="false" boundaryCondition="false" constant="false">
        <notes>
          <body xmlns="http://www.w3.org/1999/xhtml">
            <p>FORMULA: C12H18N2O4S</p>
            <p>CHARGE: 0</p>
          </body>
        </notes>
      </species>
      <species id="M_4mtolbutamide_e" name="4 hydroxy tolbutamide" compartment="e" hasOnlySubstanceUnits="false" boundaryCondition="false" constant="false">
        <notes>
          <body xmlns="http://www.w3.org/1999/xhtml">
            <p>FORMULA: C12H18N2O4S</p>
            <p>CHARGE: 0</p>
          </body>
        </notes>
      </species>
      <species id="M_4mzym_int1_c" name="4-Methylzymosterol intermediate 1" compartment="c" hasOnlySubstanceUnits="false" boundaryCondition="false" constant="false">
        <notes>
          <body xmlns="http://www.w3.org/1999/xhtml">
            <p>FORMULA: C29H46O3</p>
            <p>CHARGE: 0</p>
          </body>
        </notes>
      </species>
      <species id="M_4mzym_int2_c" name="4-Methylzymosterol intermediate 2" compartment="c" hasOnlySubstanceUnits="false" boundaryCondition="false" constant="false">
        <notes>
          <body xmlns="http://www.w3.org/1999/xhtml">
            <p>FORMULA: C28H44O</p>
            <p>CHARGE: 0</p>
          </body>
        </notes>
      </species>
      <species id="M_4nph_c" name="4-Nitrophenol" compartment="c" hasOnlySubstanceUnits="false" boundaryCondition="false" constant="false">
        <notes>
          <body xmlns="http://www.w3.org/1999/xhtml">
            <p>FORMULA: C6H5NO3</p>
            <p>CHARGE: 0</p>
          </body>
        </notes>
      </species>
      <species id="M_4nph_e" name="4-Nitrophenol" compartment="e" hasOnlySubstanceUnits="false" boundaryCondition="false" constant="false">
        <notes>
          <body xmlns="http://www.w3.org/1999/xhtml">
            <p>FORMULA: C6H5NO3</p>
            <p>CHARGE: 0</p>
          </body>
        </notes>
      </species>
      <species id="M_4nphsf_c" name="4-Nitrophenyl sulfate" compartment="c" hasOnlySubstanceUnits="false" boundaryCondition="false" constant="false">
        <notes>
          <body xmlns="http://www.w3.org/1999/xhtml">
            <p>FORMULA: C6H4NO6S</p>
            <p>CHARGE: 0</p>
          </body>
        </notes>
      </species>
      <species id="M_4nphsf_e" name="4-Nitrophenyl sulfate" compartment="e" hasOnlySubstanceUnits="false" boundaryCondition="false" constant="false">
        <notes>
          <body xmlns="http://www.w3.org/1999/xhtml">
            <p>FORMULA: C6H4NO6S</p>
            <p>CHARGE: 0</p>
          </body>
        </notes>
      </species>
      <species id="M_4ppan_c" name="D-4&apos;-Phosphopantothenate" compartment="c" hasOnlySubstanceUnits="false" boundaryCondition="false" constant="false">
        <notes>
          <body xmlns="http://www.w3.org/1999/xhtml">
            <p>FORMULA: C9H15NO8P</p>
            <p>CHARGE: 0</p>
          </body>
        </notes>
      </species>
      <species id="M_4ppcys_c" name="N-((R)-4-Phosphopantothenoyl)-L-cysteine" compartment="c" hasOnlySubstanceUnits="false" boundaryCondition="false" constant="false">
        <notes>
          <body xmlns="http://www.w3.org/1999/xhtml">
            <p>FORMULA: C12H20N2O9PS</p>
            <p>CHARGE: 0</p>
          </body>
        </notes>
      </species>
      <species id="M_4pyrdx_c" name="4-Pyridoxate" compartment="c" hasOnlySubstanceUnits="false" boundaryCondition="false" constant="false">
        <notes>
          <body xmlns="http://www.w3.org/1999/xhtml">
            <p>FORMULA: C8H9NO4</p>
            <p>CHARGE: 0</p>
          </body>
        </notes>
      </species>
      <species id="M_4pyrdx_e" name="4-Pyridoxate" compartment="e" hasOnlySubstanceUnits="false" boundaryCondition="false" constant="false">
        <notes>
          <body xmlns="http://www.w3.org/1999/xhtml">
            <p>FORMULA: C8H9NO4</p>
            <p>CHARGE: 0</p>
          </body>
        </notes>
      </species>
      <species id="M_4tmeabut_c" name="4-Trimethylammoniobutanal" compartment="c" hasOnlySubstanceUnits="false" boundaryCondition="false" constant="false">
        <notes>
          <body xmlns="http://www.w3.org/1999/xhtml">
            <p>FORMULA: C7H16NO</p>
            <p>CHARGE: 0</p>
          </body>
        </notes>
      </species>
      <species id="M_4tmeabutn_c" name="4-Trimethylammoniobutanoate" compartment="c" hasOnlySubstanceUnits="false" boundaryCondition="false" constant="false">
        <notes>
          <body xmlns="http://www.w3.org/1999/xhtml">
            <p>FORMULA: C7H15NO2</p>
            <p>CHARGE: 0</p>
          </body>
        </notes>
      </species>
      <species id="M_56dihindlcrbxlt_c" name="5,6-Dihydroxyindole-2-carboxylate" compartment="c" hasOnlySubstanceUnits="false" boundaryCondition="false" constant="false">
        <notes>
          <body xmlns="http://www.w3.org/1999/xhtml">
            <p>FORMULA: C9H6NO4</p>
            <p>CHARGE: 0</p>
          </body>
        </notes>
      </species>
      <species id="M_56dthm_c" name="5,6-Dihydrothymine" compartment="c" hasOnlySubstanceUnits="false" boundaryCondition="false" constant="false">
        <notes>
          <body xmlns="http://www.w3.org/1999/xhtml">
            <p>FORMULA: C5H8N2O2</p>
            <p>CHARGE: 0</p>
          </body>
        </notes>
      </species>
      <species id="M_56dura_c" name="5,6-dihydrouracil" compartment="c" hasOnlySubstanceUnits="false" boundaryCondition="false" constant="false">
        <notes>
          <body xmlns="http://www.w3.org/1999/xhtml">
            <p>FORMULA: C4H6N2O2</p>
            <p>CHARGE: 0</p>
          </body>
        </notes>
      </species>
      <species id="M_5HPET_c" name="5-Hydroperoxy-6-trans-8,11,14-cis-eicosatetraenoate" compartment="c" hasOnlySubstanceUnits="false" boundaryCondition="false" constant="false">
        <notes>
          <body xmlns="http://www.w3.org/1999/xhtml">
            <p>FORMULA: C20H31O4</p>
            <p>CHARGE: 0</p>
          </body>
        </notes>
      </species>
      <species id="M_5a2opntn_c" name="5-Amino-2-oxopentanoate" compartment="c" hasOnlySubstanceUnits="false" boundaryCondition="false" constant="false">
        <notes>
          <body xmlns="http://www.w3.org/1999/xhtml">
            <p>FORMULA: C5H9NO3</p>
            <p>CHARGE: 0</p>
          </body>
        </notes>
      </species>
      <species id="M_5adtststerone_c" name="5alpha-Dihydrotestosterone" compartment="c" hasOnlySubstanceUnits="false" boundaryCondition="false" constant="false">
        <notes>
          <body xmlns="http://www.w3.org/1999/xhtml">
            <p>FORMULA: C19H30O2</p>
            <p>CHARGE: 0</p>
          </body>
        </notes>
      </species>
      <species id="M_5adtststerone_e" name="5alpha-Dihydrotestosterone" compartment="e" hasOnlySubstanceUnits="false" boundaryCondition="false" constant="false">
        <notes>
          <body xmlns="http://www.w3.org/1999/xhtml">
            <p>FORMULA: C19H30O2</p>
            <p>CHARGE: 0</p>
          </body>
        </notes>
      </species>
      <species id="M_5adtststeroneglc_c" name="5alpha-Dihydrotestosterone glucuronide" compartment="c" hasOnlySubstanceUnits="false" boundaryCondition="false" constant="false">
        <notes>
          <body xmlns="http://www.w3.org/1999/xhtml">
            <p>FORMULA: C25H38O8</p>
            <p>CHARGE: 0</p>
          </body>
        </notes>
      </species>
      <species id="M_5adtststeroneglc_e" name="5alpha-Dihydrotestosterone glucuronide" compartment="e" hasOnlySubstanceUnits="false" boundaryCondition="false" constant="false">
        <notes>
          <body xmlns="http://www.w3.org/1999/xhtml">
            <p>FORMULA: C25H38O8</p>
            <p>CHARGE: 0</p>
          </body>
        </notes>
      </species>
      <species id="M_5adtststerones_c" name="5alpha-Dihydrotestosterone sulfate" compartment="c" hasOnlySubstanceUnits="false" boundaryCondition="false" constant="false">
        <notes>
          <body xmlns="http://www.w3.org/1999/xhtml">
            <p>FORMULA: C19H29O5S</p>
            <p>CHARGE: 0</p>
          </body>
        </notes>
      </species>
      <species id="M_5adtststerones_e" name="5alpha-Dihydrotestosterone sulfate" compartment="e" hasOnlySubstanceUnits="false" boundaryCondition="false" constant="false">
        <notes>
          <body xmlns="http://www.w3.org/1999/xhtml">
            <p>FORMULA: C19H29O5S</p>
            <p>CHARGE: 0</p>
          </body>
        </notes>
      </species>
      <species id="M_5aizc_c" name="5-amino-1-(5-phospho-D-ribosyl)imidazole-4-carboxylate" compartment="c" hasOnlySubstanceUnits="false" boundaryCondition="false" constant="false">
        <notes>
          <body xmlns="http://www.w3.org/1999/xhtml">
            <p>FORMULA: C9H11N3O9P</p>
            <p>CHARGE: 0</p>
          </body>
        </notes>
      </species>
      <species id="M_5aop_c" name="5-Amino-4-oxopentanoate" compartment="c" hasOnlySubstanceUnits="false" boundaryCondition="false" constant="false">
        <notes>
          <body xmlns="http://www.w3.org/1999/xhtml">
            <p>FORMULA: C5H9NO3</p>
            <p>CHARGE: 0</p>
          </body>
        </notes>
      </species>
      <species id="M_5dhf_c" name="pentaglutamyl folate (DHF)" compartment="c" hasOnlySubstanceUnits="false" boundaryCondition="false" constant="false">
        <notes>
          <body xmlns="http://www.w3.org/1999/xhtml">
            <p>FORMULA: C39H43N11O18</p>
            <p>CHARGE: 0</p>
          </body>
        </notes>
      </species>
      <species id="M_5dhf_e" name="pentaglutamyl folate (DHF)" compartment="e" hasOnlySubstanceUnits="false" boundaryCondition="false" constant="false">
        <notes>
          <body xmlns="http://www.w3.org/1999/xhtml">
            <p>FORMULA: C39H43N11O18</p>
            <p>CHARGE: 0</p>
          </body>
        </notes>
      </species>
      <species id="M_5dpmev_c" name="(R)-5-Diphosphomevalonate" compartment="c" hasOnlySubstanceUnits="false" boundaryCondition="false" constant="false">
        <notes>
          <body xmlns="http://www.w3.org/1999/xhtml">
            <p>FORMULA: C6H10O10P2</p>
            <p>CHARGE: 0</p>
          </body>
        </notes>
      </species>
      <species id="M_5forthf_c" name="5-Formiminotetrahydrofolate" compartment="c" hasOnlySubstanceUnits="false" boundaryCondition="false" constant="false">
        <notes>
          <body xmlns="http://www.w3.org/1999/xhtml">
            <p>FORMULA: C20H22N8O6</p>
            <p>CHARGE: 0</p>
          </body>
        </notes>
      </species>
      <species id="M_5fthf_c" name="5-Formyltetrahydrofolate" compartment="c" hasOnlySubstanceUnits="false" boundaryCondition="false" constant="false">
        <notes>
          <body xmlns="http://www.w3.org/1999/xhtml">
            <p>FORMULA: C20H21N7O7</p>
            <p>CHARGE: 0</p>
          </body>
        </notes>
      </species>
      <species id="M_5fthf_e" name="5-Formyltetrahydrofolate" compartment="e" hasOnlySubstanceUnits="false" boundaryCondition="false" constant="false">
        <notes>
          <body xmlns="http://www.w3.org/1999/xhtml">
            <p>FORMULA: C20H21N7O7</p>
            <p>CHARGE: 0</p>
          </body>
        </notes>
      </species>
      <species id="M_5g2oxpt_c" name="5-Guanidino-2-oxopentanoate" compartment="c" hasOnlySubstanceUnits="false" boundaryCondition="false" constant="false">
        <notes>
          <body xmlns="http://www.w3.org/1999/xhtml">
            <p>FORMULA: C6H11N3O3</p>
            <p>CHARGE: 0</p>
          </body>
        </notes>
      </species>
      <species id="M_5homeprazole_c" name="5 hydroxy omeprazole" compartment="c" hasOnlySubstanceUnits="false" boundaryCondition="false" constant="false">
        <notes>
          <body xmlns="http://www.w3.org/1999/xhtml">
            <p>FORMULA: C17H19N3O4S</p>
            <p>CHARGE: 0</p>
          </body>
        </notes>
      </species>
      <species id="M_5homeprazole_e" name="5 hydroxy omeprazole" compartment="e" hasOnlySubstanceUnits="false" boundaryCondition="false" constant="false">
        <notes>
          <body xmlns="http://www.w3.org/1999/xhtml">
            <p>FORMULA: C17H19N3O4S</p>
            <p>CHARGE: 0</p>
          </body>
        </notes>
      </species>
      <species id="M_5hoxindact_c" name="5-Hydroxyindoleacetaldehyde" compartment="c" hasOnlySubstanceUnits="false" boundaryCondition="false" constant="false">
        <notes>
          <body xmlns="http://www.w3.org/1999/xhtml">
            <p>FORMULA: C10H9NO2</p>
            <p>CHARGE: 0</p>
          </body>
        </notes>
      </species>
      <species id="M_5hoxindoa_c" name="5-Hydroxyindoleacetate" compartment="c" hasOnlySubstanceUnits="false" boundaryCondition="false" constant="false">
        <notes>
          <body xmlns="http://www.w3.org/1999/xhtml">
            <p>FORMULA: C10H8NO3</p>
            <p>CHARGE: 0</p>
          </body>
        </notes>
      </species>
      <species id="M_5hoxnfkyn_c" name="5-Hydroxy-N-formylkynurenine" compartment="c" hasOnlySubstanceUnits="false" boundaryCondition="false" constant="false">
        <notes>
          <body xmlns="http://www.w3.org/1999/xhtml">
            <p>FORMULA: C11H12N2O5</p>
            <p>CHARGE: 0</p>
          </body>
        </notes>
      </species>
      <species id="M_5htrp_c" name="5-Hydroxy-L-tryptophan" compartment="c" hasOnlySubstanceUnits="false" boundaryCondition="false" constant="false">
        <notes>
          <body xmlns="http://www.w3.org/1999/xhtml">
            <p>FORMULA: C11H12N2O3</p>
            <p>CHARGE: 0</p>
          </body>
        </notes>
      </species>
      <species id="M_5htrp_e" name="5-Hydroxy-L-tryptophan" compartment="e" hasOnlySubstanceUnits="false" boundaryCondition="false" constant="false">
        <notes>
          <body xmlns="http://www.w3.org/1999/xhtml">
            <p>FORMULA: C11H12N2O3</p>
            <p>CHARGE: 0</p>
          </body>
        </notes>
      </species>
      <species id="M_5hxkyn_c" name="5-Hydroxykynurenine" compartment="c" hasOnlySubstanceUnits="false" boundaryCondition="false" constant="false">
        <notes>
          <body xmlns="http://www.w3.org/1999/xhtml">
            <p>FORMULA: C10H12N2O4</p>
            <p>CHARGE: 0</p>
          </body>
        </notes>
      </species>
      <species id="M_5hxkynam_c" name="5-Hydroxykynurenamine" compartment="c" hasOnlySubstanceUnits="false" boundaryCondition="false" constant="false">
        <notes>
          <body xmlns="http://www.w3.org/1999/xhtml">
            <p>FORMULA: C9H13N2O2</p>
            <p>CHARGE: 0</p>
          </body>
        </notes>
      </species>
      <species id="M_5mdr1p_c" name="5-Methylthio-5-deoxy-D-ribose 1-phosphate" compartment="c" hasOnlySubstanceUnits="false" boundaryCondition="false" constant="false">
        <notes>
          <body xmlns="http://www.w3.org/1999/xhtml">
            <p>FORMULA: C6H11O7PS</p>
            <p>CHARGE: 0</p>
          </body>
        </notes>
      </species>
      <species id="M_5mdru1p_c" name="5-Methylthio-5-deoxy-D-ribulose 1-phosphate" compartment="c" hasOnlySubstanceUnits="false" boundaryCondition="false" constant="false">
        <notes>
          <body xmlns="http://www.w3.org/1999/xhtml">
            <p>FORMULA: C6H11O7PS</p>
            <p>CHARGE: 0</p>
          </body>
        </notes>
      </species>
      <species id="M_5moxact_c" name="5-Methoxyindoleacetate" compartment="c" hasOnlySubstanceUnits="false" boundaryCondition="false" constant="false">
        <notes>
          <body xmlns="http://www.w3.org/1999/xhtml">
            <p>FORMULA: C11H10NO3</p>
            <p>CHARGE: 0</p>
          </body>
        </notes>
      </species>
      <species id="M_5mta_c" name="5-Methylthioadenosine" compartment="c" hasOnlySubstanceUnits="false" boundaryCondition="false" constant="false">
        <notes>
          <body xmlns="http://www.w3.org/1999/xhtml">
            <p>FORMULA: C11H15N5O3S</p>
            <p>CHARGE: 0</p>
          </body>
        </notes>
      </species>
      <species id="M_5mthf_c" name="5-Methyltetrahydrofolate" compartment="c" hasOnlySubstanceUnits="false" boundaryCondition="false" constant="false">
        <notes>
          <body xmlns="http://www.w3.org/1999/xhtml">
            <p>FORMULA: C20H24N7O6</p>
            <p>CHARGE: 0</p>
          </body>
        </notes>
      </species>
      <species id="M_5mthf_e" name="5-Methyltetrahydrofolate" compartment="e" hasOnlySubstanceUnits="false" boundaryCondition="false" constant="false">
        <notes>
          <body xmlns="http://www.w3.org/1999/xhtml">
            <p>FORMULA: C20H24N7O6</p>
            <p>CHARGE: 0</p>
          </body>
        </notes>
      </species>
      <species id="M_5oxpro_c" name="5-Oxoproline" compartment="c" hasOnlySubstanceUnits="false" boundaryCondition="false" constant="false">
        <notes>
          <body xmlns="http://www.w3.org/1999/xhtml">
            <p>FORMULA: C5H6NO3</p>
            <p>CHARGE: 0</p>
          </body>
        </notes>
      </species>
      <species id="M_5pmev_c" name="(R)-5-Phosphomevalonate" compartment="c" hasOnlySubstanceUnits="false" boundaryCondition="false" constant="false">
        <notes>
          <body xmlns="http://www.w3.org/1999/xhtml">
            <p>FORMULA: C6H10O7P</p>
            <p>CHARGE: 0</p>
          </body>
        </notes>
      </species>
      <species id="M_5thf_c" name="pentaglutamyl folate (THF)" compartment="c" hasOnlySubstanceUnits="false" boundaryCondition="false" constant="false">
        <notes>
          <body xmlns="http://www.w3.org/1999/xhtml">
            <p>FORMULA: C39H45N11O18</p>
            <p>CHARGE: 0</p>
          </body>
        </notes>
      </species>
      <species id="M_5thf_e" name="pentaglutamyl folate (THF)" compartment="e" hasOnlySubstanceUnits="false" boundaryCondition="false" constant="false">
        <notes>
          <body xmlns="http://www.w3.org/1999/xhtml">
            <p>FORMULA: C39H45N11O18</p>
            <p>CHARGE: 0</p>
          </body>
        </notes>
      </species>
      <species id="M_6a2ohxnt_c" name="6-Amino-2-oxohexanoate" compartment="c" hasOnlySubstanceUnits="false" boundaryCondition="false" constant="false">
        <notes>
          <body xmlns="http://www.w3.org/1999/xhtml">
            <p>FORMULA: C6H11NO3</p>
            <p>CHARGE: 0</p>
          </body>
        </notes>
      </species>
      <species id="M_6dhf_c" name="haxglutamyl folate (DHF)" compartment="c" hasOnlySubstanceUnits="false" boundaryCondition="false" constant="false">
        <notes>
          <body xmlns="http://www.w3.org/1999/xhtml">
            <p>FORMULA: C44H49N12O21</p>
            <p>CHARGE: 0</p>
          </body>
        </notes>
      </species>
      <species id="M_6dhf_e" name="haxglutamyl folate (DHF)" compartment="e" hasOnlySubstanceUnits="false" boundaryCondition="false" constant="false">
        <notes>
          <body xmlns="http://www.w3.org/1999/xhtml">
            <p>FORMULA: C44H49N12O21</p>
            <p>CHARGE: 0</p>
          </body>
        </notes>
      </species>
      <species id="M_6hoxmelatn_c" name="6-Hydroxymelatonin" compartment="c" hasOnlySubstanceUnits="false" boundaryCondition="false" constant="false">
        <notes>
          <body xmlns="http://www.w3.org/1999/xhtml">
            <p>FORMULA: C13H16N2O3</p>
            <p>CHARGE: 0</p>
          </body>
        </notes>
      </species>
      <species id="M_6htststerone_c" name="6 beta hydroxy testosterone" compartment="c" hasOnlySubstanceUnits="false" boundaryCondition="false" constant="false">
        <notes>
          <body xmlns="http://www.w3.org/1999/xhtml">
            <p>FORMULA: C19H28O3</p>
            <p>CHARGE: 0</p>
          </body>
        </notes>
      </species>
      <species id="M_6htststerone_e" name="6 beta hydroxy testosterone" compartment="e" hasOnlySubstanceUnits="false" boundaryCondition="false" constant="false">
        <notes>
          <body xmlns="http://www.w3.org/1999/xhtml">
            <p>FORMULA: C19H28O3</p>
            <p>CHARGE: 0</p>
          </body>
        </notes>
      </species>
      <species id="M_6pgc_c" name="6-Phospho-D-gluconate" compartment="c" hasOnlySubstanceUnits="false" boundaryCondition="false" constant="false">
        <notes>
          <body xmlns="http://www.w3.org/1999/xhtml">
            <p>FORMULA: C6H10O10P</p>
            <p>CHARGE: 0</p>
          </body>
        </notes>
      </species>
      <species id="M_6pgl_c" name="6-phospho-D-glucono-1,5-lactone" compartment="c" hasOnlySubstanceUnits="false" boundaryCondition="false" constant="false">
        <notes>
          <body xmlns="http://www.w3.org/1999/xhtml">
            <p>FORMULA: C6H9O9P</p>
            <p>CHARGE: 0</p>
          </body>
        </notes>
      </species>
      <species id="M_6pthp_c" name="6-Pyruvoyl-5,6,7,8-tetrahydropterin" compartment="c" hasOnlySubstanceUnits="false" boundaryCondition="false" constant="false">
        <notes>
          <body xmlns="http://www.w3.org/1999/xhtml">
            <p>FORMULA: C9H11N5O3</p>
            <p>CHARGE: 0</p>
          </body>
        </notes>
      </species>
      <species id="M_6thf_c" name="hexaglutamyl folate  (THF)" compartment="c" hasOnlySubstanceUnits="false" boundaryCondition="false" constant="false">
        <notes>
          <body xmlns="http://www.w3.org/1999/xhtml">
            <p>FORMULA: C44H51N12O21</p>
            <p>CHARGE: 0</p>
          </body>
        </notes>
      </species>
      <species id="M_6thf_e" name="hexaglutamyl folate  (THF)" compartment="e" hasOnlySubstanceUnits="false" boundaryCondition="false" constant="false">
        <notes>
          <body xmlns="http://www.w3.org/1999/xhtml">
            <p>FORMULA: C44H51N12O21</p>
            <p>CHARGE: 0</p>
          </body>
        </notes>
      </species>
      <species id="M_7dhchsterol_c" name="7-Dehydrocholesterol" compartment="c" hasOnlySubstanceUnits="false" boundaryCondition="false" constant="false">
        <notes>
          <body xmlns="http://www.w3.org/1999/xhtml">
            <p>FORMULA: C27H44O</p>
            <p>CHARGE: 0</p>
          </body>
        </notes>
      </species>
      <species id="M_7dhf_c" name="heptaglutamyl folate (DHF)" compartment="c" hasOnlySubstanceUnits="false" boundaryCondition="false" constant="false">
        <notes>
          <body xmlns="http://www.w3.org/1999/xhtml">
            <p>FORMULA: C49H55N13O24</p>
            <p>CHARGE: 0</p>
          </body>
        </notes>
      </species>
      <species id="M_7dhf_e" name="heptaglutamyl folate (DHF)" compartment="e" hasOnlySubstanceUnits="false" boundaryCondition="false" constant="false">
        <notes>
          <body xmlns="http://www.w3.org/1999/xhtml">
            <p>FORMULA: C49H55N13O24</p>
            <p>CHARGE: 0</p>
          </body>
        </notes>
      </species>
      <species id="M_7thf_c" name="heptaglutamyl folate (THF)" compartment="c" hasOnlySubstanceUnits="false" boundaryCondition="false" constant="false">
        <notes>
          <body xmlns="http://www.w3.org/1999/xhtml">
            <p>FORMULA: C49H57N13O24</p>
            <p>CHARGE: 0</p>
          </body>
        </notes>
      </species>
      <species id="M_7thf_e" name="heptaglutamyl folate (THF)" compartment="e" hasOnlySubstanceUnits="false" boundaryCondition="false" constant="false">
        <notes>
          <body xmlns="http://www.w3.org/1999/xhtml">
            <p>FORMULA: C49H57N13O24</p>
            <p>CHARGE: 0</p>
          </body>
        </notes>
      </species>
      <species id="M_9_DASH_cis_DASH_retfa_c" name="fatty acid 9-cis-retinol" compartment="c" hasOnlySubstanceUnits="false" boundaryCondition="false" constant="false">
        <notes>
          <body xmlns="http://www.w3.org/1999/xhtml">
            <p>FORMULA: C20H29OFULLR2CO</p>
            <p>CHARGE: 0</p>
          </body>
        </notes>
      </species>
      <species id="M_9_DASH_cis_DASH_retfa_e" name="fatty acid 9-cis-retinol" compartment="e" hasOnlySubstanceUnits="false" boundaryCondition="false" constant="false">
        <notes>
          <body xmlns="http://www.w3.org/1999/xhtml">
            <p>FORMULA: C20H29OFULLR2CO</p>
            <p>CHARGE: 0</p>
          </body>
        </notes>
      </species>
      <species id="M_ACP_c" name="acyl carrier protein" compartment="c" hasOnlySubstanceUnits="false" boundaryCondition="false" constant="false">
        <notes>
          <body xmlns="http://www.w3.org/1999/xhtml">
            <p>FORMULA: C11H21N2O7PRS</p>
            <p>CHARGE: 0</p>
          </body>
        </notes>
      </species>
      <species id="M_Asn_DASH_X_DASH_Ser_FSLASH_Thr_c" name="protein-linked asparagine residue (N-glycosylation site)" compartment="c" hasOnlySubstanceUnits="false" boundaryCondition="false" constant="false">
        <notes>
          <body xmlns="http://www.w3.org/1999/xhtml">
            <p>FORMULA: XH</p>
            <p>CHARGE: 0</p>
          </body>
        </notes>
      </species>
      <species id="M_L2aadp6sa_c" name="L-2-Aminoadipate 6-semialdehyde" compartment="c" hasOnlySubstanceUnits="false" boundaryCondition="false" constant="false">
        <notes>
          <body xmlns="http://www.w3.org/1999/xhtml">
            <p>FORMULA: C6H11NO3</p>
            <p>CHARGE: 0</p>
          </body>
        </notes>
      </species>
      <species id="M_L2aadp_c" name="L-2-Aminoadipate" compartment="c" hasOnlySubstanceUnits="false" boundaryCondition="false" constant="false">
        <notes>
          <body xmlns="http://www.w3.org/1999/xhtml">
            <p>FORMULA: C6H10NO4</p>
            <p>CHARGE: 0</p>
          </body>
        </notes>
      </species>
      <species id="M_L_DASH_dpchrm_c" name="L-Dopachrome" compartment="c" hasOnlySubstanceUnits="false" boundaryCondition="false" constant="false">
        <notes>
          <body xmlns="http://www.w3.org/1999/xhtml">
            <p>FORMULA: C9H6NO4</p>
            <p>CHARGE: 0</p>
          </body>
        </notes>
      </species>
      <species id="M_Lcyst_c" name="L-Cysteate" compartment="c" hasOnlySubstanceUnits="false" boundaryCondition="false" constant="false">
        <notes>
          <body xmlns="http://www.w3.org/1999/xhtml">
            <p>FORMULA: C3H6NO5S</p>
            <p>CHARGE: 0</p>
          </body>
        </notes>
      </species>
      <species id="M_Lcystin_c" name="L-Cystine" compartment="c" hasOnlySubstanceUnits="false" boundaryCondition="false" constant="false">
        <notes>
          <body xmlns="http://www.w3.org/1999/xhtml">
            <p>FORMULA: C6H12N2O4S2</p>
            <p>CHARGE: 0</p>
          </body>
        </notes>
      </species>
      <species id="M_Lcystin_e" name="L-Cystine" compartment="e" hasOnlySubstanceUnits="false" boundaryCondition="false" constant="false">
        <notes>
          <body xmlns="http://www.w3.org/1999/xhtml">
            <p>FORMULA: C6H12N2O4S2</p>
            <p>CHARGE: 0</p>
          </body>
        </notes>
      </species>
      <species id="M_Lfmkynr_c" name="L-Formylkynurenine" compartment="c" hasOnlySubstanceUnits="false" boundaryCondition="false" constant="false">
        <notes>
          <body xmlns="http://www.w3.org/1999/xhtml">
            <p>FORMULA: C11H12N2O4</p>
            <p>CHARGE: 0</p>
          </body>
        </notes>
      </species>
      <species id="M_Lkynr_c" name="L-Kynurenine" compartment="c" hasOnlySubstanceUnits="false" boundaryCondition="false" constant="false">
        <notes>
          <body xmlns="http://www.w3.org/1999/xhtml">
            <p>FORMULA: C10H12N2O3</p>
            <p>CHARGE: 0</p>
          </body>
        </notes>
      </species>
      <species id="M_Lpipecol_c" name="L-Pipecolate" compartment="c" hasOnlySubstanceUnits="false" boundaryCondition="false" constant="false">
        <notes>
          <body xmlns="http://www.w3.org/1999/xhtml">
            <p>FORMULA: C6H11NO2</p>
            <p>CHARGE: 0</p>
          </body>
        </notes>
      </species>
      <species id="M_Nacasp_c" name="N-Acetyl-L-aspartate" compartment="c" hasOnlySubstanceUnits="false" boundaryCondition="false" constant="false">
        <notes>
          <body xmlns="http://www.w3.org/1999/xhtml">
            <p>FORMULA: C6H7NO5</p>
            <p>CHARGE: 0</p>
          </body>
        </notes>
      </species>
      <species id="M_Nacsertn_c" name="N-Acetylserotonin" compartment="c" hasOnlySubstanceUnits="false" boundaryCondition="false" constant="false">
        <notes>
          <body xmlns="http://www.w3.org/1999/xhtml">
            <p>FORMULA: C12H14N2O2</p>
            <p>CHARGE: 0</p>
          </body>
        </notes>
      </species>
      <species id="M_Ndmelys_c" name="Protein N6,N6-dimethyl-L-lysine" compartment="c" hasOnlySubstanceUnits="false" boundaryCondition="false" constant="false">
        <notes>
          <body xmlns="http://www.w3.org/1999/xhtml">
            <p>FORMULA: C2H7X</p>
            <p>CHARGE: 0</p>
          </body>
        </notes>
      </species>
      <species id="M_Nmelys_c" name="Histone N6-methyl-L-lysine" compartment="c" hasOnlySubstanceUnits="false" boundaryCondition="false" constant="false">
        <notes>
          <body xmlns="http://www.w3.org/1999/xhtml">
            <p>FORMULA: CXH4</p>
            <p>CHARGE: 0</p>
          </body>
        </notes>
      </species>
      <species id="M_Ntmelys_c" name="Protein N6,N6,N6-trimethyl-L-lysine" compartment="c" hasOnlySubstanceUnits="false" boundaryCondition="false" constant="false">
        <notes>
          <body xmlns="http://www.w3.org/1999/xhtml">
            <p>FORMULA: C3H10X</p>
            <p>CHARGE: 0</p>
          </body>
        </notes>
      </species>
      <species id="M_R1coa_hs_c" name="R group 1 Coenzyme A homo sapiens" compartment="c" hasOnlySubstanceUnits="false" boundaryCondition="false" constant="false">
        <notes>
          <body xmlns="http://www.w3.org/1999/xhtml">
            <p>FORMULA: XCO2C21H31N7O15P3S</p>
            <p>CHARGE: 0</p>
          </body>
        </notes>
      </species>
      <species id="M_R2coa_hs_c" name="R group 2 Coenzyme A homo sapiens" compartment="c" hasOnlySubstanceUnits="false" boundaryCondition="false" constant="false">
        <notes>
          <body xmlns="http://www.w3.org/1999/xhtml">
            <p>FORMULA: XCO2C21H31N7O15P3S</p>
            <p>CHARGE: 0</p>
          </body>
        </notes>
      </species>
      <species id="M_R3coa_hs_c" name="R group 3 Coenzyme A homo sapiens" compartment="c" hasOnlySubstanceUnits="false" boundaryCondition="false" constant="false">
        <notes>
          <body xmlns="http://www.w3.org/1999/xhtml">
            <p>FORMULA: XCO2C21H31N7O15P3S</p>
            <p>CHARGE: 0</p>
          </body>
        </notes>
      </species>
      <species id="M_R4coa_hs_c" name="R group 4 Coenzyme A homo sapiens" compartment="c" hasOnlySubstanceUnits="false" boundaryCondition="false" constant="false">
        <notes>
          <body xmlns="http://www.w3.org/1999/xhtml">
            <p>FORMULA: XCO2C21H31N7O15P3S</p>
            <p>CHARGE: 0</p>
          </body>
        </notes>
      </species>
      <species id="M_R5coa_hs_c" name="R group 5 Coenzyme A homo sapiens" compartment="c" hasOnlySubstanceUnits="false" boundaryCondition="false" constant="false">
        <notes>
          <body xmlns="http://www.w3.org/1999/xhtml">
            <p>FORMULA: XCO2C21H31N7O15P3S</p>
            <p>CHARGE: 0</p>
          </body>
        </notes>
      </species>
      <species id="M_R6coa_hs_c" name="R group 6 Coenzyme A homo sapiens" compartment="c" hasOnlySubstanceUnits="false" boundaryCondition="false" constant="false">
        <notes>
          <body xmlns="http://www.w3.org/1999/xhtml">
            <p>FORMULA: XCO2C21H31N7O15P3S</p>
            <p>CHARGE: 0</p>
          </body>
        </notes>
      </species>
      <species id="M_Rtotal2_c" name="R total 2 position" compartment="c" hasOnlySubstanceUnits="false" boundaryCondition="false" constant="false">
        <notes>
          <body xmlns="http://www.w3.org/1999/xhtml">
            <p>FORMULA: CO2FULLR2</p>
            <p>CHARGE: 0</p>
          </body>
        </notes>
      </species>
      <species id="M_Rtotal2_e" name="R total 2 position" compartment="e" hasOnlySubstanceUnits="false" boundaryCondition="false" constant="false">
        <notes>
          <body xmlns="http://www.w3.org/1999/xhtml">
            <p>FORMULA: CO2FULLR2</p>
            <p>CHARGE: 0</p>
          </body>
        </notes>
      </species>
      <species id="M_Rtotal2coa_c" name="R total 2 coenzyme A" compartment="c" hasOnlySubstanceUnits="false" boundaryCondition="false" constant="false">
        <notes>
          <body xmlns="http://www.w3.org/1999/xhtml">
            <p>FORMULA: CO2FULLR2C21H31N7O15P3S</p>
            <p>CHARGE: 0</p>
          </body>
        </notes>
      </species>
      <species id="M_Rtotal2crn_c" name="R total 2 carnitine" compartment="c" hasOnlySubstanceUnits="false" boundaryCondition="false" constant="false">
        <notes>
          <body xmlns="http://www.w3.org/1999/xhtml">
            <p>FORMULA: CO2FULLR2C7H14NO2</p>
            <p>CHARGE: 0</p>
          </body>
        </notes>
      </species>
      <species id="M_Rtotal3_c" name="R total 3 position" compartment="c" hasOnlySubstanceUnits="false" boundaryCondition="false" constant="false">
        <notes>
          <body xmlns="http://www.w3.org/1999/xhtml">
            <p>FORMULA: CO2FULLR3</p>
            <p>CHARGE: 0</p>
          </body>
        </notes>
      </species>
      <species id="M_Rtotal3_e" name="R total 3 position" compartment="e" hasOnlySubstanceUnits="false" boundaryCondition="false" constant="false">
        <notes>
          <body xmlns="http://www.w3.org/1999/xhtml">
            <p>FORMULA: CO2FULLR3</p>
            <p>CHARGE: 0</p>
          </body>
        </notes>
      </species>
      <species id="M_Rtotal3coa_c" name="R total 3 Coenzyme A" compartment="c" hasOnlySubstanceUnits="false" boundaryCondition="false" constant="false">
        <notes>
          <body xmlns="http://www.w3.org/1999/xhtml">
            <p>FORMULA: CO2FULLR3C21H31N7O15P3S</p>
            <p>CHARGE: 0</p>
          </body>
        </notes>
      </species>
      <species id="M_Rtotal3crn_c" name="R total 3 carnitine" compartment="c" hasOnlySubstanceUnits="false" boundaryCondition="false" constant="false">
        <notes>
          <body xmlns="http://www.w3.org/1999/xhtml">
            <p>FORMULA: CO2FULLR3C7H14NO2</p>
            <p>CHARGE: 0</p>
          </body>
        </notes>
      </species>
      <species id="M_Rtotal_c" name="R total" compartment="c" hasOnlySubstanceUnits="false" boundaryCondition="false" constant="false">
        <notes>
          <body xmlns="http://www.w3.org/1999/xhtml">
            <p>FORMULA: CO2FULLR</p>
            <p>CHARGE: 0</p>
          </body>
        </notes>
      </species>
      <species id="M_Rtotal_e" name="R total" compartment="e" hasOnlySubstanceUnits="false" boundaryCondition="false" constant="false">
        <notes>
          <body xmlns="http://www.w3.org/1999/xhtml">
            <p>FORMULA: CO2FULLR</p>
            <p>CHARGE: 0</p>
          </body>
        </notes>
      </species>
      <species id="M_Rtotalcoa_c" name="R total Coenzyme A" compartment="c" hasOnlySubstanceUnits="false" boundaryCondition="false" constant="false">
        <notes>
          <body xmlns="http://www.w3.org/1999/xhtml">
            <p>FORMULA: CO2FULLRC21H31N7O15P3S</p>
            <p>CHARGE: 0</p>
          </body>
        </notes>
      </species>
      <species id="M_Rtotalcrn_c" name="R total carnitine" compartment="c" hasOnlySubstanceUnits="false" boundaryCondition="false" constant="false">
        <notes>
          <body xmlns="http://www.w3.org/1999/xhtml">
            <p>FORMULA: CO2FULLRC7H14NO2</p>
            <p>CHARGE: 0</p>
          </body>
        </notes>
      </species>
      <species id="M_Ser_DASH_Gly_FSLASH_Ala_DASH_X_DASH_Gly_c" name="protein-linked serine residue (glycosaminoglycan attachment site)" compartment="c" hasOnlySubstanceUnits="false" boundaryCondition="false" constant="false">
        <notes>
          <body xmlns="http://www.w3.org/1999/xhtml">
            <p>FORMULA: XH</p>
            <p>CHARGE: 0</p>
          </body>
        </notes>
      </species>
      <species id="M_Ser_FSLASH_Thr_c" name="protein-linked serine or threonine residue (O-glycosylation site)" compartment="c" hasOnlySubstanceUnits="false" boundaryCondition="false" constant="false">
        <notes>
          <body xmlns="http://www.w3.org/1999/xhtml">
            <p>FORMULA: XH</p>
            <p>CHARGE: 0</p>
          </body>
        </notes>
      </species>
      <species id="M_Sfglutth_c" name="S-Formylglutathione" compartment="c" hasOnlySubstanceUnits="false" boundaryCondition="false" constant="false">
        <notes>
          <body xmlns="http://www.w3.org/1999/xhtml">
            <p>FORMULA: C11H16N3O7S</p>
            <p>CHARGE: 0</p>
          </body>
        </notes>
      </species>
      <species id="M_Ssq23epx_c" name="(S)-Squalene-2,3-epoxide" compartment="c" hasOnlySubstanceUnits="false" boundaryCondition="false" constant="false">
        <notes>
          <body xmlns="http://www.w3.org/1999/xhtml">
            <p>FORMULA: C30H50O</p>
            <p>CHARGE: 0</p>
          </body>
        </notes>
      </species>
      <species id="M_T4hcinnm_c" name="trans-4-Hydroxycinnamate" compartment="c" hasOnlySubstanceUnits="false" boundaryCondition="false" constant="false">
        <notes>
          <body xmlns="http://www.w3.org/1999/xhtml">
            <p>FORMULA: C9H7O3</p>
            <p>CHARGE: 0</p>
          </body>
        </notes>
      </species>
      <species id="M_T_antigen_c" name="T antigen (core 1)" compartment="c" hasOnlySubstanceUnits="false" boundaryCondition="false" constant="false">
        <notes>
          <body xmlns="http://www.w3.org/1999/xhtml">
            <p>FORMULA: C14H24NO10X</p>
            <p>CHARGE: 0</p>
          </body>
        </notes>
      </species>
      <species id="M_Tn_antigen_c" name="Tn antigen" compartment="c" hasOnlySubstanceUnits="false" boundaryCondition="false" constant="false">
        <notes>
          <body xmlns="http://www.w3.org/1999/xhtml">
            <p>FORMULA: C8H14NO5X</p>
            <p>CHARGE: 0</p>
          </body>
        </notes>
      </species>
      <species id="M_Tyr_DASH_ggn_c" name="Tyr-194 of apo-glycogenin protein (primer for glycogen synthesis)" compartment="c" hasOnlySubstanceUnits="false" boundaryCondition="false" constant="false">
        <notes>
          <body xmlns="http://www.w3.org/1999/xhtml">
            <p>FORMULA: XOH</p>
            <p>CHARGE: 0</p>
          </body>
        </notes>
      </species>
      <species id="M_Tyr_DASH_ggn_e" name="Tyr-194 of apo-glycogenin protein (primer for glycogen synthesis)" compartment="e" hasOnlySubstanceUnits="false" boundaryCondition="false" constant="false">
        <notes>
          <body xmlns="http://www.w3.org/1999/xhtml">
            <p>FORMULA: XOH</p>
            <p>CHARGE: 0</p>
          </body>
        </notes>
      </species>
      <species id="M_aacoa_c" name="Acetoacetyl-CoA" compartment="c" hasOnlySubstanceUnits="false" boundaryCondition="false" constant="false">
        <notes>
          <body xmlns="http://www.w3.org/1999/xhtml">
            <p>FORMULA: C25H36N7O18P3S</p>
            <p>CHARGE: 0</p>
          </body>
        </notes>
      </species>
      <species id="M_aact_c" name="Aminoacetone" compartment="c" hasOnlySubstanceUnits="false" boundaryCondition="false" constant="false">
        <notes>
          <body xmlns="http://www.w3.org/1999/xhtml">
            <p>FORMULA: C3H8NO</p>
            <p>CHARGE: 0</p>
          </body>
        </notes>
      </species>
      <species id="M_abt_c" name="L-Arabinitol" compartment="c" hasOnlySubstanceUnits="false" boundaryCondition="false" constant="false">
        <notes>
          <body xmlns="http://www.w3.org/1999/xhtml">
            <p>FORMULA: C5H12O5</p>
            <p>CHARGE: 0</p>
          </body>
        </notes>
      </species>
      <species id="M_abt_e" name="L-Arabinitol" compartment="e" hasOnlySubstanceUnits="false" boundaryCondition="false" constant="false">
        <notes>
          <body xmlns="http://www.w3.org/1999/xhtml">
            <p>FORMULA: C5H12O5</p>
            <p>CHARGE: 0</p>
          </body>
        </notes>
      </species>
      <species id="M_acACP_c" name="Acetyl-ACP" compartment="c" hasOnlySubstanceUnits="false" boundaryCondition="false" constant="false">
        <notes>
          <body xmlns="http://www.w3.org/1999/xhtml">
            <p>FORMULA: C13H23N2O8PRS</p>
            <p>CHARGE: 0</p>
          </body>
        </notes>
      </species>
      <species id="M_ac_c" name="Acetate" compartment="c" hasOnlySubstanceUnits="false" boundaryCondition="false" constant="false">
        <notes>
          <body xmlns="http://www.w3.org/1999/xhtml">
            <p>FORMULA: C2H3O2</p>
            <p>CHARGE: 0</p>
          </body>
        </notes>
      </species>
      <species id="M_ac_e" name="Acetate" compartment="e" hasOnlySubstanceUnits="false" boundaryCondition="false" constant="false">
        <notes>
          <body xmlns="http://www.w3.org/1999/xhtml">
            <p>FORMULA: C2H3O2</p>
            <p>CHARGE: 0</p>
          </body>
        </notes>
      </species>
      <species id="M_acac_c" name="Acetoacetate" compartment="c" hasOnlySubstanceUnits="false" boundaryCondition="false" constant="false">
        <notes>
          <body xmlns="http://www.w3.org/1999/xhtml">
            <p>FORMULA: C4H5O3</p>
            <p>CHARGE: 0</p>
          </body>
        </notes>
      </species>
      <species id="M_acac_e" name="Acetoacetate" compartment="e" hasOnlySubstanceUnits="false" boundaryCondition="false" constant="false">
        <notes>
          <body xmlns="http://www.w3.org/1999/xhtml">
            <p>FORMULA: C4H5O3</p>
            <p>CHARGE: 0</p>
          </body>
        </notes>
      </species>
      <species id="M_acald_c" name="Acetaldehyde" compartment="c" hasOnlySubstanceUnits="false" boundaryCondition="false" constant="false">
        <notes>
          <body xmlns="http://www.w3.org/1999/xhtml">
            <p>FORMULA: C2H4O</p>
            <p>CHARGE: 0</p>
          </body>
        </notes>
      </species>
      <species id="M_acald_e" name="Acetaldehyde" compartment="e" hasOnlySubstanceUnits="false" boundaryCondition="false" constant="false">
        <notes>
          <body xmlns="http://www.w3.org/1999/xhtml">
            <p>FORMULA: C2H4O</p>
            <p>CHARGE: 0</p>
          </body>
        </notes>
      </species>
      <species id="M_accoa_c" name="Acetyl-CoA" compartment="c" hasOnlySubstanceUnits="false" boundaryCondition="false" constant="false">
        <notes>
          <body xmlns="http://www.w3.org/1999/xhtml">
            <p>FORMULA: C23H34N7O17P3S</p>
            <p>CHARGE: 0</p>
          </body>
        </notes>
      </species>
      <species id="M_acetol_c" name="Acetol" compartment="c" hasOnlySubstanceUnits="false" boundaryCondition="false" constant="false">
        <notes>
          <body xmlns="http://www.w3.org/1999/xhtml">
            <p>FORMULA: C3H6O2</p>
            <p>CHARGE: 0</p>
          </body>
        </notes>
      </species>
      <species id="M_acetone_c" name="Acetone" compartment="c" hasOnlySubstanceUnits="false" boundaryCondition="false" constant="false">
        <notes>
          <body xmlns="http://www.w3.org/1999/xhtml">
            <p>FORMULA: C3H6O</p>
            <p>CHARGE: 0</p>
          </body>
        </notes>
      </species>
      <species id="M_acetone_e" name="Acetone" compartment="e" hasOnlySubstanceUnits="false" boundaryCondition="false" constant="false">
        <notes>
          <body xmlns="http://www.w3.org/1999/xhtml">
            <p>FORMULA: C3H6O</p>
            <p>CHARGE: 0</p>
          </body>
        </notes>
      </species>
      <species id="M_acg5p_c" name="N-Acetyl-L-glutamyl 5-phosphate" compartment="c" hasOnlySubstanceUnits="false" boundaryCondition="false" constant="false">
        <notes>
          <body xmlns="http://www.w3.org/1999/xhtml">
            <p>FORMULA: C7H9NO8P</p>
            <p>CHARGE: 0</p>
          </body>
        </notes>
      </species>
      <species id="M_acg5sa_c" name="N-Acetyl-L-glutamate 5-semialdehyde" compartment="c" hasOnlySubstanceUnits="false" boundaryCondition="false" constant="false">
        <notes>
          <body xmlns="http://www.w3.org/1999/xhtml">
            <p>FORMULA: C7H10NO4</p>
            <p>CHARGE: 0</p>
          </body>
        </notes>
      </species>
      <species id="M_acgagbside_hs_c" name="alpha GalNAc globoside (homo sapiens)" compartment="c" hasOnlySubstanceUnits="false" boundaryCondition="false" constant="false">
        <notes>
          <body xmlns="http://www.w3.org/1999/xhtml">
            <p>FORMULA: C52H92N3O27FULLRCO</p>
            <p>CHARGE: 0</p>
          </body>
        </notes>
      </species>
      <species id="M_acgal1p_c" name="N-Acetyl-D-galactosamine 1-phosphate" compartment="c" hasOnlySubstanceUnits="false" boundaryCondition="false" constant="false">
        <notes>
          <body xmlns="http://www.w3.org/1999/xhtml">
            <p>FORMULA: C8H14NO9P</p>
            <p>CHARGE: 0</p>
          </body>
        </notes>
      </species>
      <species id="M_acgal_c" name="N-Acetyl-D-galactosamine" compartment="c" hasOnlySubstanceUnits="false" boundaryCondition="false" constant="false">
        <notes>
          <body xmlns="http://www.w3.org/1999/xhtml">
            <p>FORMULA: C8H15NO6</p>
            <p>CHARGE: 0</p>
          </body>
        </notes>
      </species>
      <species id="M_acgalfuc12gal14acglcgalgluside_hs_c" name="(Gal)2 (GalNAc)1 (Glc)1 (GlcNAc)1 (LFuc)1 (Cer)1" compartment="c" hasOnlySubstanceUnits="false" boundaryCondition="false" constant="false">
        <notes>
          <body xmlns="http://www.w3.org/1999/xhtml">
            <p>FORMULA: C58H102N3O31FULLRCO</p>
            <p>CHARGE: 0</p>
          </body>
        </notes>
      </species>
      <species id="M_acgalfucgalacgalfuc12gal14acglcgalgluside_hs_c" name="Type IIIA glycolipid" compartment="c" hasOnlySubstanceUnits="false" boundaryCondition="false" constant="false">
        <notes>
          <body xmlns="http://www.w3.org/1999/xhtml">
            <p>FORMULA: C78H135N4O45FULLRCO</p>
            <p>CHARGE: 0</p>
          </body>
        </notes>
      </species>
      <species id="M_acgalfucgalacgalfuc12gal14acglcgalgluside_hs_e" name="Type IIIA glycolipid" compartment="e" hasOnlySubstanceUnits="false" boundaryCondition="false" constant="false">
        <notes>
          <body xmlns="http://www.w3.org/1999/xhtml">
            <p>FORMULA: C78H135N4O45FULLRCO</p>
            <p>CHARGE: 0</p>
          </body>
        </notes>
      </species>
      <species id="M_acgalfucgalacgalfucgalacglcgal14acglcgalgluside_hs_c" name="Type IIIAb" compartment="c" hasOnlySubstanceUnits="false" boundaryCondition="false" constant="false">
        <notes>
          <body xmlns="http://www.w3.org/1999/xhtml">
            <p>FORMULA: C92H158N5O55FULLRCO</p>
            <p>CHARGE: 0</p>
          </body>
        </notes>
      </species>
      <species id="M_acgalfucgalacgalfucgalacglcgal14acglcgalgluside_hs_e" name="Type IIIAb" compartment="e" hasOnlySubstanceUnits="false" boundaryCondition="false" constant="false">
        <notes>
          <body xmlns="http://www.w3.org/1999/xhtml">
            <p>FORMULA: C92H158N5O55FULLRCO</p>
            <p>CHARGE: 0</p>
          </body>
        </notes>
      </species>
      <species id="M_acgalfucgalacglcgal14acglcgalgluside_hs_c" name="(Gal)3 (GalNAc)1 (Glc)1 (GlcNAc)2 (LFuc)1 (Cer)1" compartment="c" hasOnlySubstanceUnits="false" boundaryCondition="false" constant="false">
        <notes>
          <body xmlns="http://www.w3.org/1999/xhtml">
            <p>FORMULA: C72H125N4O41FULLRCO</p>
            <p>CHARGE: 0</p>
          </body>
        </notes>
      </species>
      <species id="M_acgalfucgalacglcgalgluside_hs_c" name="Type IA glycolipid" compartment="c" hasOnlySubstanceUnits="false" boundaryCondition="false" constant="false">
        <notes>
          <body xmlns="http://www.w3.org/1999/xhtml">
            <p>FORMULA: C58H102N3O31FULLRCO</p>
            <p>CHARGE: 0</p>
          </body>
        </notes>
      </species>
      <species id="M_acgam1p_c" name="N-Acetyl-D-glucosamine 1-phosphate" compartment="c" hasOnlySubstanceUnits="false" boundaryCondition="false" constant="false">
        <notes>
          <body xmlns="http://www.w3.org/1999/xhtml">
            <p>FORMULA: C8H14NO9P</p>
            <p>CHARGE: 0</p>
          </body>
        </notes>
      </species>
      <species id="M_acgam6p_c" name="N-Acetyl-D-glucosamine 6-phosphate" compartment="c" hasOnlySubstanceUnits="false" boundaryCondition="false" constant="false">
        <notes>
          <body xmlns="http://www.w3.org/1999/xhtml">
            <p>FORMULA: C8H14NO9P</p>
            <p>CHARGE: 0</p>
          </body>
        </notes>
      </species>
      <species id="M_acgam_c" name="N-Acetyl-D-glucosamine" compartment="c" hasOnlySubstanceUnits="false" boundaryCondition="false" constant="false">
        <notes>
          <body xmlns="http://www.w3.org/1999/xhtml">
            <p>FORMULA: C8H15NO6</p>
            <p>CHARGE: 0</p>
          </body>
        </notes>
      </species>
      <species id="M_acgam_e" name="N-Acetyl-D-glucosamine" compartment="e" hasOnlySubstanceUnits="false" boundaryCondition="false" constant="false">
        <notes>
          <body xmlns="http://www.w3.org/1999/xhtml">
            <p>FORMULA: C8H15NO6</p>
            <p>CHARGE: 0</p>
          </body>
        </notes>
      </species>
      <species id="M_acgbgbside_hs_c" name="beta GalNAc globoside (homo sapiens)" compartment="c" hasOnlySubstanceUnits="false" boundaryCondition="false" constant="false">
        <notes>
          <body xmlns="http://www.w3.org/1999/xhtml">
            <p>FORMULA: C52H92N3O27FULLRCO</p>
            <p>CHARGE: 0</p>
          </body>
        </notes>
      </species>
      <species id="M_acglc13galacglcgal14acglcgalgluside_hs_c" name="nLc7Cer" compartment="c" hasOnlySubstanceUnits="false" boundaryCondition="false" constant="false">
        <notes>
          <body xmlns="http://www.w3.org/1999/xhtml">
            <p>FORMULA: C66H115N4O37FULLRCO</p>
            <p>CHARGE: 0</p>
          </body>
        </notes>
      </species>
      <species id="M_acglcgal14acglcgalgluside_hs_c" name="nLc5Cer" compartment="c" hasOnlySubstanceUnits="false" boundaryCondition="false" constant="false">
        <notes>
          <body xmlns="http://www.w3.org/1999/xhtml">
            <p>FORMULA: C52H92N3O27FULLRCO</p>
            <p>CHARGE: 0</p>
          </body>
        </notes>
      </species>
      <species id="M_acglcgalacglcgal14acglcgalgluside_hs_c" name="(Gal)3 (Glc)1 (GlcNAc)3 (Cer)1" compartment="c" hasOnlySubstanceUnits="false" boundaryCondition="false" constant="false">
        <notes>
          <body xmlns="http://www.w3.org/1999/xhtml">
            <p>FORMULA: C66H115N4O37FULLRCO</p>
            <p>CHARGE: 0</p>
          </body>
        </notes>
      </species>
      <species id="M_acglcgalgbside_hs_c" name="GlcNAc-Gal globoside (homo sapiens)" compartment="c" hasOnlySubstanceUnits="false" boundaryCondition="false" constant="false">
        <notes>
          <body xmlns="http://www.w3.org/1999/xhtml">
            <p>FORMULA: C58H102N3O32FULLRCO</p>
            <p>CHARGE: 0</p>
          </body>
        </notes>
      </species>
      <species id="M_acglcgalgluside_hs_c" name="(Gal)1 (Glc)1 (GlcNAc)1 (Cer)1" compartment="c" hasOnlySubstanceUnits="false" boundaryCondition="false" constant="false">
        <notes>
          <body xmlns="http://www.w3.org/1999/xhtml">
            <p>FORMULA: C38H69N2O17FULLRCO</p>
            <p>CHARGE: 0</p>
          </body>
        </notes>
      </species>
      <species id="M_acgpail_hs_c" name="N-Acetyl-D-glucosaminylphosphatidylinositol" compartment="c" hasOnlySubstanceUnits="false" boundaryCondition="false" constant="false">
        <notes>
          <body xmlns="http://www.w3.org/1999/xhtml">
            <p>FORMULA: C17H29NO14PFULLRCO2FULLR2CO2</p>
            <p>CHARGE: 0</p>
          </body>
        </notes>
      </species>
      <species id="M_ach_c" name="Acetylcholine" compartment="c" hasOnlySubstanceUnits="false" boundaryCondition="false" constant="false">
        <notes>
          <body xmlns="http://www.w3.org/1999/xhtml">
            <p>FORMULA: C7H16NO2</p>
            <p>CHARGE: 0</p>
          </body>
        </notes>
      </species>
      <species id="M_ach_e" name="Acetylcholine" compartment="e" hasOnlySubstanceUnits="false" boundaryCondition="false" constant="false">
        <notes>
          <body xmlns="http://www.w3.org/1999/xhtml">
            <p>FORMULA: C7H16NO2</p>
            <p>CHARGE: 0</p>
          </body>
        </notes>
      </species>
      <species id="M_acmana_c" name="N-Acetyl-D-mannosamine" compartment="c" hasOnlySubstanceUnits="false" boundaryCondition="false" constant="false">
        <notes>
          <body xmlns="http://www.w3.org/1999/xhtml">
            <p>FORMULA: C8H15NO6</p>
            <p>CHARGE: 0</p>
          </body>
        </notes>
      </species>
      <species id="M_acmanap_c" name="N-Acetyl-D-mannosamine 6-phosphate" compartment="c" hasOnlySubstanceUnits="false" boundaryCondition="false" constant="false">
        <notes>
          <body xmlns="http://www.w3.org/1999/xhtml">
            <p>FORMULA: C8H14NO9P</p>
            <p>CHARGE: 0</p>
          </body>
        </notes>
      </species>
      <species id="M_acn13acngalgbside_hs_c" name="sialyl (1,3) sialyl (2,6) galactosylgloboside (homo sapiens)" compartment="c" hasOnlySubstanceUnits="false" boundaryCondition="false" constant="false">
        <notes>
          <body xmlns="http://www.w3.org/1999/xhtml">
            <p>FORMULA: C72H121N4O43FULLRCO</p>
            <p>CHARGE: 0</p>
          </body>
        </notes>
      </species>
      <species id="M_acn13acngalgbside_hs_e" name="sialyl (1,3) sialyl (2,6) galactosylgloboside (homo sapiens)" compartment="e" hasOnlySubstanceUnits="false" boundaryCondition="false" constant="false">
        <notes>
          <body xmlns="http://www.w3.org/1999/xhtml">
            <p>FORMULA: C72H121N4O43FULLRCO</p>
            <p>CHARGE: 0</p>
          </body>
        </notes>
      </species>
      <species id="M_acn23acngalgbside_hs_c" name="sialyl (2,3) sialyl (2,6) galactosylgloboside (homo sapiens)" compartment="c" hasOnlySubstanceUnits="false" boundaryCondition="false" constant="false">
        <notes>
          <body xmlns="http://www.w3.org/1999/xhtml">
            <p>FORMULA: C72H121N4O43FULLRCO</p>
            <p>CHARGE: 0</p>
          </body>
        </notes>
      </species>
      <species id="M_acn23acngalgbside_hs_e" name="sialyl (2,3) sialyl (2,6) galactosylgloboside (homo sapiens)" compartment="e" hasOnlySubstanceUnits="false" boundaryCondition="false" constant="false">
        <notes>
          <body xmlns="http://www.w3.org/1999/xhtml">
            <p>FORMULA: C72H121N4O43FULLRCO</p>
            <p>CHARGE: 0</p>
          </body>
        </notes>
      </species>
      <species id="M_acnacngal14acglcgalgluside_hs_c" name="3&apos;,8&apos;-LD1" compartment="c" hasOnlySubstanceUnits="false" boundaryCondition="false" constant="false">
        <notes>
          <body xmlns="http://www.w3.org/1999/xhtml">
            <p>FORMULA: C66H111N4O38FULLRCO</p>
            <p>CHARGE: 0</p>
          </body>
        </notes>
      </species>
      <species id="M_acnacngal14acglcgalgluside_hs_e" name="3&apos;,8&apos;-LD1" compartment="e" hasOnlySubstanceUnits="false" boundaryCondition="false" constant="false">
        <notes>
          <body xmlns="http://www.w3.org/1999/xhtml">
            <p>FORMULA: C66H111N4O38FULLRCO</p>
            <p>CHARGE: 0</p>
          </body>
        </notes>
      </species>
      <species id="M_acnacngalgbside_hs_c" name="disialyl galactosylgloboside (homo sapiens)" compartment="c" hasOnlySubstanceUnits="false" boundaryCondition="false" constant="false">
        <notes>
          <body xmlns="http://www.w3.org/1999/xhtml">
            <p>FORMULA: C72H121N4O43FULLRCO</p>
            <p>CHARGE: 0</p>
          </body>
        </notes>
      </species>
      <species id="M_acnacngalgbside_hs_e" name="disialyl galactosylgloboside (homo sapiens)" compartment="e" hasOnlySubstanceUnits="false" boundaryCondition="false" constant="false">
        <notes>
          <body xmlns="http://www.w3.org/1999/xhtml">
            <p>FORMULA: C72H121N4O43FULLRCO</p>
            <p>CHARGE: 0</p>
          </body>
        </notes>
      </species>
      <species id="M_acnam_c" name="N-Acetylneuraminate" compartment="c" hasOnlySubstanceUnits="false" boundaryCondition="false" constant="false">
        <notes>
          <body xmlns="http://www.w3.org/1999/xhtml">
            <p>FORMULA: C11H18NO9</p>
            <p>CHARGE: 0</p>
          </body>
        </notes>
      </species>
      <species id="M_acnamp_c" name="N-Acetylneuraminate 9-phosphate" compartment="c" hasOnlySubstanceUnits="false" boundaryCondition="false" constant="false">
        <notes>
          <body xmlns="http://www.w3.org/1999/xhtml">
            <p>FORMULA: C11H17NO12P</p>
            <p>CHARGE: 0</p>
          </body>
        </notes>
      </species>
      <species id="M_acngal14acglcgalgluside_hs_c" name="Sialyl-3-paragloboside" compartment="c" hasOnlySubstanceUnits="false" boundaryCondition="false" constant="false">
        <notes>
          <body xmlns="http://www.w3.org/1999/xhtml">
            <p>FORMULA: C55H95N3O30FULLRCO</p>
            <p>CHARGE: 0</p>
          </body>
        </notes>
      </species>
      <species id="M_acngalacglcgal14acglcgalgluside_hs_c" name="VI3NeuAc-nLc6Cer" compartment="c" hasOnlySubstanceUnits="false" boundaryCondition="false" constant="false">
        <notes>
          <body xmlns="http://www.w3.org/1999/xhtml">
            <p>FORMULA: C69H118N4O40FULLRCO</p>
            <p>CHARGE: 0</p>
          </body>
        </notes>
      </species>
      <species id="M_acngalacglcgal14acglcgalgluside_hs_e" name="VI3NeuAc-nLc6Cer" compartment="e" hasOnlySubstanceUnits="false" boundaryCondition="false" constant="false">
        <notes>
          <body xmlns="http://www.w3.org/1999/xhtml">
            <p>FORMULA: C69H118N4O40FULLRCO</p>
            <p>CHARGE: 0</p>
          </body>
        </notes>
      </species>
      <species id="M_acngalacglcgalgluside_hs_c" name="(Gal)3 (Glc)1 (GlcNAc)1 (Cer)1" compartment="c" hasOnlySubstanceUnits="false" boundaryCondition="false" constant="false">
        <notes>
          <body xmlns="http://www.w3.org/1999/xhtml">
            <p>FORMULA: C55H95N3O30FULLRCO</p>
            <p>CHARGE: 0</p>
          </body>
        </notes>
      </species>
      <species id="M_acngalgbside_hs_c" name="sialyl galactosylgloboside (homo sapiens)" compartment="c" hasOnlySubstanceUnits="false" boundaryCondition="false" constant="false">
        <notes>
          <body xmlns="http://www.w3.org/1999/xhtml">
            <p>FORMULA: C61H105N3O35FULLRCO</p>
            <p>CHARGE: 0</p>
          </body>
        </notes>
      </species>
      <species id="M_acorn_c" name="N2-Acetyl-L-ornithine" compartment="c" hasOnlySubstanceUnits="false" boundaryCondition="false" constant="false">
        <notes>
          <body xmlns="http://www.w3.org/1999/xhtml">
            <p>FORMULA: C7H14N2O3</p>
            <p>CHARGE: 0</p>
          </body>
        </notes>
      </species>
      <species id="M_acrn_c" name="O-Acetylcarnitine" compartment="c" hasOnlySubstanceUnits="false" boundaryCondition="false" constant="false">
        <notes>
          <body xmlns="http://www.w3.org/1999/xhtml">
            <p>FORMULA: C9H17NO4</p>
            <p>CHARGE: 0</p>
          </body>
        </notes>
      </species>
      <species id="M_ade_c" name="Adenine" compartment="c" hasOnlySubstanceUnits="false" boundaryCondition="false" constant="false">
        <notes>
          <body xmlns="http://www.w3.org/1999/xhtml">
            <p>FORMULA: C5H5N5</p>
            <p>CHARGE: 0</p>
          </body>
        </notes>
      </species>
      <species id="M_ade_e" name="Adenine" compartment="e" hasOnlySubstanceUnits="false" boundaryCondition="false" constant="false">
        <notes>
          <body xmlns="http://www.w3.org/1999/xhtml">
            <p>FORMULA: C5H5N5</p>
            <p>CHARGE: 0</p>
          </body>
        </notes>
      </species>
      <species id="M_adhap_hs_c" name="acyl-dihydroxyacetone phosphate" compartment="c" hasOnlySubstanceUnits="false" boundaryCondition="false" constant="false">
        <notes>
          <body xmlns="http://www.w3.org/1999/xhtml">
            <p>FORMULA: C3H4O6PFULLRCO</p>
            <p>CHARGE: 0</p>
          </body>
        </notes>
      </species>
      <species id="M_adn_c" name="Adenosine" compartment="c" hasOnlySubstanceUnits="false" boundaryCondition="false" constant="false">
        <notes>
          <body xmlns="http://www.w3.org/1999/xhtml">
            <p>FORMULA: C10H13N5O4</p>
            <p>CHARGE: 0</p>
          </body>
        </notes>
      </species>
      <species id="M_adn_e" name="Adenosine" compartment="e" hasOnlySubstanceUnits="false" boundaryCondition="false" constant="false">
        <notes>
          <body xmlns="http://www.w3.org/1999/xhtml">
            <p>FORMULA: C10H13N5O4</p>
            <p>CHARGE: 0</p>
          </body>
        </notes>
      </species>
      <species id="M_adocbl_c" name="Adenosylcobalamin" compartment="c" hasOnlySubstanceUnits="false" boundaryCondition="false" constant="false">
        <notes>
          <body xmlns="http://www.w3.org/1999/xhtml">
            <p>FORMULA: C72H100CoN18O17P</p>
            <p>CHARGE: 0</p>
          </body>
        </notes>
      </species>
      <species id="M_adp_c" name="ADP" compartment="c" hasOnlySubstanceUnits="false" boundaryCondition="false" constant="false">
        <notes>
          <body xmlns="http://www.w3.org/1999/xhtml">
            <p>FORMULA: C10H12N5O10P2</p>
            <p>CHARGE: 0</p>
          </body>
        </notes>
      </species>
      <species id="M_adp_e" name="ADP" compartment="e" hasOnlySubstanceUnits="false" boundaryCondition="false" constant="false">
        <notes>
          <body xmlns="http://www.w3.org/1999/xhtml">
            <p>FORMULA: C10H12N5O10P2</p>
            <p>CHARGE: 0</p>
          </body>
        </notes>
      </species>
      <species id="M_adpglc_c" name="ADPglucose" compartment="c" hasOnlySubstanceUnits="false" boundaryCondition="false" constant="false">
        <notes>
          <body xmlns="http://www.w3.org/1999/xhtml">
            <p>FORMULA: C16H23N5O15P2</p>
            <p>CHARGE: 0</p>
          </body>
        </notes>
      </species>
      <species id="M_adpman_c" name="ADPmannose" compartment="c" hasOnlySubstanceUnits="false" boundaryCondition="false" constant="false">
        <notes>
          <body xmlns="http://www.w3.org/1999/xhtml">
            <p>FORMULA: C16H23N5O15P2</p>
            <p>CHARGE: 0</p>
          </body>
        </notes>
      </species>
      <species id="M_adprbp_c" name="ADPribose 2&apos;-phosphate" compartment="c" hasOnlySubstanceUnits="false" boundaryCondition="false" constant="false">
        <notes>
          <body xmlns="http://www.w3.org/1999/xhtml">
            <p>FORMULA: C15H20N5O17P3</p>
            <p>CHARGE: 0</p>
          </body>
        </notes>
      </species>
      <species id="M_adprbp_e" name="ADPribose 2&apos;-phosphate" compartment="e" hasOnlySubstanceUnits="false" boundaryCondition="false" constant="false">
        <notes>
          <body xmlns="http://www.w3.org/1999/xhtml">
            <p>FORMULA: C15H20N5O17P3</p>
            <p>CHARGE: 0</p>
          </body>
        </notes>
      </species>
      <species id="M_adprib_c" name="ADPribose" compartment="c" hasOnlySubstanceUnits="false" boundaryCondition="false" constant="false">
        <notes>
          <body xmlns="http://www.w3.org/1999/xhtml">
            <p>FORMULA: C15H21N5O14P2</p>
            <p>CHARGE: 0</p>
          </body>
        </notes>
      </species>
      <species id="M_adprib_e" name="ADPribose" compartment="e" hasOnlySubstanceUnits="false" boundaryCondition="false" constant="false">
        <notes>
          <body xmlns="http://www.w3.org/1999/xhtml">
            <p>FORMULA: C15H21N5O14P2</p>
            <p>CHARGE: 0</p>
          </body>
        </notes>
      </species>
      <species id="M_adrn_c" name="adrenic acid" compartment="c" hasOnlySubstanceUnits="false" boundaryCondition="false" constant="false">
        <notes>
          <body xmlns="http://www.w3.org/1999/xhtml">
            <p>FORMULA: C22H35O2</p>
            <p>CHARGE: 0</p>
          </body>
        </notes>
      </species>
      <species id="M_adrn_e" name="adrenic acid" compartment="e" hasOnlySubstanceUnits="false" boundaryCondition="false" constant="false">
        <notes>
          <body xmlns="http://www.w3.org/1999/xhtml">
            <p>FORMULA: C22H35O2</p>
            <p>CHARGE: 0</p>
          </body>
        </notes>
      </species>
      <species id="M_adrncoa_c" name="adrenyl coenzyme A" compartment="c" hasOnlySubstanceUnits="false" boundaryCondition="false" constant="false">
        <notes>
          <body xmlns="http://www.w3.org/1999/xhtml">
            <p>FORMULA: C43H66N7O17P3S</p>
            <p>CHARGE: 0</p>
          </body>
        </notes>
      </species>
      <species id="M_adrncrn_c" name="Adrenyl carnitine" compartment="c" hasOnlySubstanceUnits="false" boundaryCondition="false" constant="false">
        <notes>
          <body xmlns="http://www.w3.org/1999/xhtml">
            <p>FORMULA: C29H49NO4</p>
            <p>CHARGE: 0</p>
          </body>
        </notes>
      </species>
      <species id="M_adrnl_c" name="Adrenaline" compartment="c" hasOnlySubstanceUnits="false" boundaryCondition="false" constant="false">
        <notes>
          <body xmlns="http://www.w3.org/1999/xhtml">
            <p>FORMULA: C9H14NO3</p>
            <p>CHARGE: 0</p>
          </body>
        </notes>
      </species>
      <species id="M_adrnl_e" name="Adrenaline" compartment="e" hasOnlySubstanceUnits="false" boundaryCondition="false" constant="false">
        <notes>
          <body xmlns="http://www.w3.org/1999/xhtml">
            <p>FORMULA: C9H14NO3</p>
            <p>CHARGE: 0</p>
          </body>
        </notes>
      </species>
      <species id="M_adsel_c" name="Adenylylselenate" compartment="c" hasOnlySubstanceUnits="false" boundaryCondition="false" constant="false">
        <notes>
          <body xmlns="http://www.w3.org/1999/xhtml">
            <p>FORMULA: C10H12N5O10PSe</p>
            <p>CHARGE: 0</p>
          </body>
        </notes>
      </species>
      <species id="M_aflatoxin_c" name="aflatoxin B1" compartment="c" hasOnlySubstanceUnits="false" boundaryCondition="false" constant="false">
        <notes>
          <body xmlns="http://www.w3.org/1999/xhtml">
            <p>FORMULA: C17H12O6</p>
            <p>CHARGE: 0</p>
          </body>
        </notes>
      </species>
      <species id="M_aflatoxin_e" name="aflatoxin B1" compartment="e" hasOnlySubstanceUnits="false" boundaryCondition="false" constant="false">
        <notes>
          <body xmlns="http://www.w3.org/1999/xhtml">
            <p>FORMULA: C17H12O6</p>
            <p>CHARGE: 0</p>
          </body>
        </notes>
      </species>
      <species id="M_agm_c" name="Agmatine" compartment="c" hasOnlySubstanceUnits="false" boundaryCondition="false" constant="false">
        <notes>
          <body xmlns="http://www.w3.org/1999/xhtml">
            <p>FORMULA: C5H16N4</p>
            <p>CHARGE: 0</p>
          </body>
        </notes>
      </species>
      <species id="M_ahandrostan_c" name="3alpha-Hydroxy-5beta-androstan-17-one" compartment="c" hasOnlySubstanceUnits="false" boundaryCondition="false" constant="false">
        <notes>
          <body xmlns="http://www.w3.org/1999/xhtml">
            <p>FORMULA: C19H30O2</p>
            <p>CHARGE: 0</p>
          </body>
        </notes>
      </species>
      <species id="M_ahandrostanglc_c" name="Etiocholan-3alpha-ol-17-one 3-glucuronide" compartment="c" hasOnlySubstanceUnits="false" boundaryCondition="false" constant="false">
        <notes>
          <body xmlns="http://www.w3.org/1999/xhtml">
            <p>FORMULA: C25H38O8</p>
            <p>CHARGE: 0</p>
          </body>
        </notes>
      </species>
      <species id="M_ahandrostanglc_e" name="Etiocholan-3alpha-ol-17-one 3-glucuronide" compartment="e" hasOnlySubstanceUnits="false" boundaryCondition="false" constant="false">
        <notes>
          <body xmlns="http://www.w3.org/1999/xhtml">
            <p>FORMULA: C25H38O8</p>
            <p>CHARGE: 0</p>
          </body>
        </notes>
      </species>
      <species id="M_ahcys_c" name="S-Adenosyl-L-homocysteine" compartment="c" hasOnlySubstanceUnits="false" boundaryCondition="false" constant="false">
        <notes>
          <body xmlns="http://www.w3.org/1999/xhtml">
            <p>FORMULA: C14H20N6O5S</p>
            <p>CHARGE: 0</p>
          </body>
        </notes>
      </species>
      <species id="M_ahdt_c" name="2-Amino-4-hydroxy-6-(erythro-1,2,3-trihydroxypropyl)dihydropteridine triphosphate" compartment="c" hasOnlySubstanceUnits="false" boundaryCondition="false" constant="false">
        <notes>
          <body xmlns="http://www.w3.org/1999/xhtml">
            <p>FORMULA: C9H12N5O13P3</p>
            <p>CHARGE: 0</p>
          </body>
        </notes>
      </species>
      <species id="M_aicar_c" name="5-Amino-1-(5-Phospho-D-ribosyl)imidazole-4-carboxamide" compartment="c" hasOnlySubstanceUnits="false" boundaryCondition="false" constant="false">
        <notes>
          <body xmlns="http://www.w3.org/1999/xhtml">
            <p>FORMULA: C9H13N4O8P</p>
            <p>CHARGE: 0</p>
          </body>
        </notes>
      </species>
      <species id="M_air_c" name="5-amino-1-(5-phospho-D-ribosyl)imidazole" compartment="c" hasOnlySubstanceUnits="false" boundaryCondition="false" constant="false">
        <notes>
          <body xmlns="http://www.w3.org/1999/xhtml">
            <p>FORMULA: C8H12N3O7P</p>
            <p>CHARGE: 0</p>
          </body>
        </notes>
      </species>
      <species id="M_ak2g_hs_c" name="1-alkyl 2-acylglycerol" compartment="c" hasOnlySubstanceUnits="false" boundaryCondition="false" constant="false">
        <notes>
          <body xmlns="http://www.w3.org/1999/xhtml">
            <p>FORMULA: C5H10O2FULLRFULLR2CO2</p>
            <p>CHARGE: 0</p>
          </body>
        </notes>
      </species>
      <species id="M_ak2gchol_hs_c" name="1-alkyl 2-acylglycerol 3-phosphocholine" compartment="c" hasOnlySubstanceUnits="false" boundaryCondition="false" constant="false">
        <notes>
          <body xmlns="http://www.w3.org/1999/xhtml">
            <p>FORMULA: C10H20O5NPFULLRFULLR2CO</p>
            <p>CHARGE: 0</p>
          </body>
        </notes>
      </species>
      <species id="M_ak2gp_hs_c" name="1-alkyl 2-acylglycerol 3-phosphate" compartment="c" hasOnlySubstanceUnits="false" boundaryCondition="false" constant="false">
        <notes>
          <body xmlns="http://www.w3.org/1999/xhtml">
            <p>FORMULA: C5H9O6PFULLRFULLR2CO</p>
            <p>CHARGE: 0</p>
          </body>
        </notes>
      </species>
      <species id="M_ak2gpe_hs_c" name="1-alkyl 2-acylglycerol 3-phosphoethanolamine" compartment="c" hasOnlySubstanceUnits="false" boundaryCondition="false" constant="false">
        <notes>
          <body xmlns="http://www.w3.org/1999/xhtml">
            <p>FORMULA: C7H16O5NPFULLRFULLR2CO</p>
            <p>CHARGE: 0</p>
          </body>
        </notes>
      </species>
      <species id="M_ak2lgchol_hs_c" name="1-alkyl 2-lysoglycerol 3-phosphocholine" compartment="c" hasOnlySubstanceUnits="false" boundaryCondition="false" constant="false">
        <notes>
          <body xmlns="http://www.w3.org/1999/xhtml">
            <p>FORMULA: C10H21O5NPFULLR</p>
            <p>CHARGE: 0</p>
          </body>
        </notes>
      </species>
      <species id="M_ak2lgchol_hs_e" name="1-alkyl 2-lysoglycerol 3-phosphocholine" compartment="e" hasOnlySubstanceUnits="false" boundaryCondition="false" constant="false">
        <notes>
          <body xmlns="http://www.w3.org/1999/xhtml">
            <p>FORMULA: C10H21O5NPFULLR</p>
            <p>CHARGE: 0</p>
          </body>
        </notes>
      </species>
      <species id="M_akdhap_hs_c" name="1-alkyldihydroxyacetone phosphate" compartment="c" hasOnlySubstanceUnits="false" boundaryCondition="false" constant="false">
        <notes>
          <body xmlns="http://www.w3.org/1999/xhtml">
            <p>FORMULA: C3H4O6PFULLRC2H4</p>
            <p>CHARGE: 0</p>
          </body>
        </notes>
      </species>
      <species id="M_akg_c" name="2-Oxoglutarate" compartment="c" hasOnlySubstanceUnits="false" boundaryCondition="false" constant="false">
        <notes>
          <body xmlns="http://www.w3.org/1999/xhtml">
            <p>FORMULA: C5H4O5</p>
            <p>CHARGE: 0</p>
          </body>
        </notes>
      </species>
      <species id="M_akg_e" name="2-Oxoglutarate" compartment="e" hasOnlySubstanceUnits="false" boundaryCondition="false" constant="false">
        <notes>
          <body xmlns="http://www.w3.org/1999/xhtml">
            <p>FORMULA: C5H4O5</p>
            <p>CHARGE: 0</p>
          </body>
        </notes>
      </species>
      <species id="M_akgp_hs_c" name="1-alkylglycerol 3-phosphate (homo sapiens)" compartment="c" hasOnlySubstanceUnits="false" boundaryCondition="false" constant="false">
        <notes>
          <body xmlns="http://www.w3.org/1999/xhtml">
            <p>FORMULA: C4H10O4PFULLRCO2</p>
            <p>CHARGE: 0</p>
          </body>
        </notes>
      </species>
      <species id="M_ala_DASH_B_c" name="beta-Alanine" compartment="c" hasOnlySubstanceUnits="false" boundaryCondition="false" constant="false">
        <notes>
          <body xmlns="http://www.w3.org/1999/xhtml">
            <p>FORMULA: C3H7NO2</p>
            <p>CHARGE: 0</p>
          </body>
        </notes>
      </species>
      <species id="M_ala_DASH_B_e" name="beta-Alanine" compartment="e" hasOnlySubstanceUnits="false" boundaryCondition="false" constant="false">
        <notes>
          <body xmlns="http://www.w3.org/1999/xhtml">
            <p>FORMULA: C3H7NO2</p>
            <p>CHARGE: 0</p>
          </body>
        </notes>
      </species>
      <species id="M_ala_DASH_D_c" name="D-Alanine" compartment="c" hasOnlySubstanceUnits="false" boundaryCondition="false" constant="false">
        <notes>
          <body xmlns="http://www.w3.org/1999/xhtml">
            <p>FORMULA: C3H7NO2</p>
            <p>CHARGE: 0</p>
          </body>
        </notes>
      </species>
      <species id="M_ala_DASH_D_e" name="D-Alanine" compartment="e" hasOnlySubstanceUnits="false" boundaryCondition="false" constant="false">
        <notes>
          <body xmlns="http://www.w3.org/1999/xhtml">
            <p>FORMULA: C3H7NO2</p>
            <p>CHARGE: 0</p>
          </body>
        </notes>
      </species>
      <species id="M_ala_DASH_L_c" name="L-Alanine" compartment="c" hasOnlySubstanceUnits="false" boundaryCondition="false" constant="false">
        <notes>
          <body xmlns="http://www.w3.org/1999/xhtml">
            <p>FORMULA: C3H7NO2</p>
            <p>CHARGE: 0</p>
          </body>
        </notes>
      </species>
      <species id="M_ala_DASH_L_e" name="L-Alanine" compartment="e" hasOnlySubstanceUnits="false" boundaryCondition="false" constant="false">
        <notes>
          <body xmlns="http://www.w3.org/1999/xhtml">
            <p>FORMULA: C3H7NO2</p>
            <p>CHARGE: 0</p>
          </body>
        </notes>
      </species>
      <species id="M_aldstrn_c" name="Aldosterone" compartment="c" hasOnlySubstanceUnits="false" boundaryCondition="false" constant="false">
        <notes>
          <body xmlns="http://www.w3.org/1999/xhtml">
            <p>FORMULA: C21H28O5</p>
            <p>CHARGE: 0</p>
          </body>
        </notes>
      </species>
      <species id="M_aldstrn_e" name="Aldosterone" compartment="e" hasOnlySubstanceUnits="false" boundaryCondition="false" constant="false">
        <notes>
          <body xmlns="http://www.w3.org/1999/xhtml">
            <p>FORMULA: C21H28O5</p>
            <p>CHARGE: 0</p>
          </body>
        </notes>
      </species>
      <species id="M_alkylR1oh_c" name="hydroxy alkyl chain" compartment="c" hasOnlySubstanceUnits="false" boundaryCondition="false" constant="false">
        <notes>
          <body xmlns="http://www.w3.org/1999/xhtml">
            <p>FORMULA: C2H5OFULLR</p>
            <p>CHARGE: 0</p>
          </body>
        </notes>
      </species>
      <species id="M_alpa_hs_c" name="lysophosphatidic acid (homo sapiens)" compartment="c" hasOnlySubstanceUnits="false" boundaryCondition="false" constant="false">
        <notes>
          <body xmlns="http://www.w3.org/1999/xhtml">
            <p>FORMULA: C3H6O5PFULLRCO2</p>
            <p>CHARGE: 0</p>
          </body>
        </notes>
      </species>
      <species id="M_alpam_c" name="S-aminomethyldihydrolipoamide" compartment="c" hasOnlySubstanceUnits="false" boundaryCondition="false" constant="false">
        <notes>
          <body xmlns="http://www.w3.org/1999/xhtml">
            <p>FORMULA: C9H21N2OS2</p>
            <p>CHARGE: 0</p>
          </body>
        </notes>
      </species>
      <species id="M_alpro_c" name="S-Aminomethyldihydrolipoylprotein" compartment="c" hasOnlySubstanceUnits="false" boundaryCondition="false" constant="false">
        <notes>
          <body xmlns="http://www.w3.org/1999/xhtml">
            <p>FORMULA: CH6NS2X</p>
            <p>CHARGE: 0</p>
          </body>
        </notes>
      </species>
      <species id="M_am6sa_c" name="2-Aminomuconate 6-semialdehyde" compartment="c" hasOnlySubstanceUnits="false" boundaryCondition="false" constant="false">
        <notes>
          <body xmlns="http://www.w3.org/1999/xhtml">
            <p>FORMULA: C6H7NO3</p>
            <p>CHARGE: 0</p>
          </body>
        </notes>
      </species>
      <species id="M_amet_c" name="S-Adenosyl-L-methionine" compartment="c" hasOnlySubstanceUnits="false" boundaryCondition="false" constant="false">
        <notes>
          <body xmlns="http://www.w3.org/1999/xhtml">
            <p>FORMULA: C15H23N6O5S</p>
            <p>CHARGE: 0</p>
          </body>
        </notes>
      </species>
      <species id="M_ametam_c" name="S-Adenosylmethioninamine" compartment="c" hasOnlySubstanceUnits="false" boundaryCondition="false" constant="false">
        <notes>
          <body xmlns="http://www.w3.org/1999/xhtml">
            <p>FORMULA: C14H24N6O3S</p>
            <p>CHARGE: 0</p>
          </body>
        </notes>
      </species>
      <species id="M_amp_c" name="AMP" compartment="c" hasOnlySubstanceUnits="false" boundaryCondition="false" constant="false">
        <notes>
          <body xmlns="http://www.w3.org/1999/xhtml">
            <p>FORMULA: C10H12N5O7P</p>
            <p>CHARGE: 0</p>
          </body>
        </notes>
      </species>
      <species id="M_amp_e" name="AMP" compartment="e" hasOnlySubstanceUnits="false" boundaryCondition="false" constant="false">
        <notes>
          <body xmlns="http://www.w3.org/1999/xhtml">
            <p>FORMULA: C10H12N5O7P</p>
            <p>CHARGE: 0</p>
          </body>
        </notes>
      </species>
      <species id="M_amuco_c" name="2-Aminomuconate" compartment="c" hasOnlySubstanceUnits="false" boundaryCondition="false" constant="false">
        <notes>
          <body xmlns="http://www.w3.org/1999/xhtml">
            <p>FORMULA: C6H6NO4</p>
            <p>CHARGE: 0</p>
          </body>
        </notes>
      </species>
      <species id="M_andrstandn_c" name="androstanedione" compartment="c" hasOnlySubstanceUnits="false" boundaryCondition="false" constant="false">
        <notes>
          <body xmlns="http://www.w3.org/1999/xhtml">
            <p>FORMULA: C19H28O2</p>
            <p>CHARGE: 0</p>
          </body>
        </notes>
      </species>
      <species id="M_andrstndn_c" name="Androstenedione" compartment="c" hasOnlySubstanceUnits="false" boundaryCondition="false" constant="false">
        <notes>
          <body xmlns="http://www.w3.org/1999/xhtml">
            <p>FORMULA: C19H26O2</p>
            <p>CHARGE: 0</p>
          </body>
        </notes>
      </species>
      <species id="M_andrstrn_c" name="Androsterone" compartment="c" hasOnlySubstanceUnits="false" boundaryCondition="false" constant="false">
        <notes>
          <body xmlns="http://www.w3.org/1999/xhtml">
            <p>FORMULA: C19H30O2</p>
            <p>CHARGE: 0</p>
          </body>
        </notes>
      </species>
      <species id="M_andrstrn_e" name="Androsterone" compartment="e" hasOnlySubstanceUnits="false" boundaryCondition="false" constant="false">
        <notes>
          <body xmlns="http://www.w3.org/1999/xhtml">
            <p>FORMULA: C19H30O2</p>
            <p>CHARGE: 0</p>
          </body>
        </notes>
      </species>
      <species id="M_andrstrnglc_c" name="androsterone glucuronide" compartment="c" hasOnlySubstanceUnits="false" boundaryCondition="false" constant="false">
        <notes>
          <body xmlns="http://www.w3.org/1999/xhtml">
            <p>FORMULA: C25H38O8</p>
            <p>CHARGE: 0</p>
          </body>
        </notes>
      </species>
      <species id="M_andrstrnglc_e" name="androsterone glucuronide" compartment="e" hasOnlySubstanceUnits="false" boundaryCondition="false" constant="false">
        <notes>
          <body xmlns="http://www.w3.org/1999/xhtml">
            <p>FORMULA: C25H38O8</p>
            <p>CHARGE: 0</p>
          </body>
        </notes>
      </species>
      <species id="M_anth_c" name="Anthranilate" compartment="c" hasOnlySubstanceUnits="false" boundaryCondition="false" constant="false">
        <notes>
          <body xmlns="http://www.w3.org/1999/xhtml">
            <p>FORMULA: C7H6NO2</p>
            <p>CHARGE: 0</p>
          </body>
        </notes>
      </species>
      <species id="M_antipyrene_c" name="antipyrene" compartment="c" hasOnlySubstanceUnits="false" boundaryCondition="false" constant="false">
        <notes>
          <body xmlns="http://www.w3.org/1999/xhtml">
            <p>FORMULA: C11H12N2O</p>
            <p>CHARGE: 0</p>
          </body>
        </notes>
      </species>
      <species id="M_antipyrene_e" name="antipyrene" compartment="e" hasOnlySubstanceUnits="false" boundaryCondition="false" constant="false">
        <notes>
          <body xmlns="http://www.w3.org/1999/xhtml">
            <p>FORMULA: C11H12N2O</p>
            <p>CHARGE: 0</p>
          </body>
        </notes>
      </species>
      <species id="M_ap4a_c" name="P1,P4-Bis(5&apos;-adenosyl) tetraphosphate" compartment="c" hasOnlySubstanceUnits="false" boundaryCondition="false" constant="false">
        <notes>
          <body xmlns="http://www.w3.org/1999/xhtml">
            <p>FORMULA: C20H24N10O19P4</p>
            <p>CHARGE: 0</p>
          </body>
        </notes>
      </species>
      <species id="M_apnnox_c" name="alpha-Pinene-oxide" compartment="c" hasOnlySubstanceUnits="false" boundaryCondition="false" constant="false">
        <notes>
          <body xmlns="http://www.w3.org/1999/xhtml">
            <p>FORMULA: C10H16O</p>
            <p>CHARGE: 0</p>
          </body>
        </notes>
      </species>
      <species id="M_apnnox_e" name="alpha-Pinene-oxide" compartment="e" hasOnlySubstanceUnits="false" boundaryCondition="false" constant="false">
        <notes>
          <body xmlns="http://www.w3.org/1999/xhtml">
            <p>FORMULA: C10H16O</p>
            <p>CHARGE: 0</p>
          </body>
        </notes>
      </species>
      <species id="M_apoC_DASH_Lys_btn_c" name="Holocarboxylase (biotin covalent bound to Lys residue of apoC)" compartment="c" hasOnlySubstanceUnits="false" boundaryCondition="false" constant="false">
        <notes>
          <body xmlns="http://www.w3.org/1999/xhtml">
            <p>FORMULA: C16H27N4O3SX</p>
            <p>CHARGE: 0</p>
          </body>
        </notes>
      </species>
      <species id="M_apoC_DASH_Lys_c" name="Apocarboxylase (Lys residue)" compartment="c" hasOnlySubstanceUnits="false" boundaryCondition="false" constant="false">
        <notes>
          <body xmlns="http://www.w3.org/1999/xhtml">
            <p>FORMULA: C6H13N2OX</p>
            <p>CHARGE: 0</p>
          </body>
        </notes>
      </species>
      <species id="M_apoC_c" name="Apocarboxlase (no lys residue)" compartment="c" hasOnlySubstanceUnits="false" boundaryCondition="false" constant="false">
        <notes>
          <body xmlns="http://www.w3.org/1999/xhtml">
            <p>FORMULA: XH</p>
            <p>CHARGE: 0</p>
          </body>
        </notes>
      </species>
      <species id="M_appnn_c" name="(+)-alpha-Pinene" compartment="c" hasOnlySubstanceUnits="false" boundaryCondition="false" constant="false">
        <notes>
          <body xmlns="http://www.w3.org/1999/xhtml">
            <p>FORMULA: C10H16</p>
            <p>CHARGE: 0</p>
          </body>
        </notes>
      </species>
      <species id="M_appnn_e" name="(+)-alpha-Pinene" compartment="e" hasOnlySubstanceUnits="false" boundaryCondition="false" constant="false">
        <notes>
          <body xmlns="http://www.w3.org/1999/xhtml">
            <p>FORMULA: C10H16</p>
            <p>CHARGE: 0</p>
          </body>
        </notes>
      </species>
      <species id="M_aprgstrn_c" name="20alpha-Hydroxyprogesterone" compartment="c" hasOnlySubstanceUnits="false" boundaryCondition="false" constant="false">
        <notes>
          <body xmlns="http://www.w3.org/1999/xhtml">
            <p>FORMULA: C21H32O2</p>
            <p>CHARGE: 0</p>
          </body>
        </notes>
      </species>
      <species id="M_aprgstrn_e" name="20alpha-Hydroxyprogesterone" compartment="e" hasOnlySubstanceUnits="false" boundaryCondition="false" constant="false">
        <notes>
          <body xmlns="http://www.w3.org/1999/xhtml">
            <p>FORMULA: C21H32O2</p>
            <p>CHARGE: 0</p>
          </body>
        </notes>
      </species>
      <species id="M_aprut_c" name="N-Acetylputrescine" compartment="c" hasOnlySubstanceUnits="false" boundaryCondition="false" constant="false">
        <notes>
          <body xmlns="http://www.w3.org/1999/xhtml">
            <p>FORMULA: C6H15N2O</p>
            <p>CHARGE: 0</p>
          </body>
        </notes>
      </species>
      <species id="M_aps_c" name="Adenosine 5&apos;-phosphosulfate" compartment="c" hasOnlySubstanceUnits="false" boundaryCondition="false" constant="false">
        <notes>
          <body xmlns="http://www.w3.org/1999/xhtml">
            <p>FORMULA: C10H12N5O10PS</p>
            <p>CHARGE: 0</p>
          </body>
        </notes>
      </species>
      <species id="M_aqcobal_c" name="Aquacob(III)alamin" compartment="c" hasOnlySubstanceUnits="false" boundaryCondition="false" constant="false">
        <notes>
          <body xmlns="http://www.w3.org/1999/xhtml">
            <p>FORMULA: C62H93CoN13O15P</p>
            <p>CHARGE: 0</p>
          </body>
        </notes>
      </species>
      <species id="M_aqcobal_e" name="Aquacob(III)alamin" compartment="e" hasOnlySubstanceUnits="false" boundaryCondition="false" constant="false">
        <notes>
          <body xmlns="http://www.w3.org/1999/xhtml">
            <p>FORMULA: C62H93CoN13O15P</p>
            <p>CHARGE: 0</p>
          </body>
        </notes>
      </species>
      <species id="M_arab_DASH_L_c" name="L-Arabinose" compartment="c" hasOnlySubstanceUnits="false" boundaryCondition="false" constant="false">
        <notes>
          <body xmlns="http://www.w3.org/1999/xhtml">
            <p>FORMULA: C5H10O5</p>
            <p>CHARGE: 0</p>
          </body>
        </notes>
      </species>
      <species id="M_arab_DASH_L_e" name="L-Arabinose" compartment="e" hasOnlySubstanceUnits="false" boundaryCondition="false" constant="false">
        <notes>
          <body xmlns="http://www.w3.org/1999/xhtml">
            <p>FORMULA: C5H10O5</p>
            <p>CHARGE: 0</p>
          </body>
        </notes>
      </species>
      <species id="M_arach_c" name="Arachidic acid" compartment="c" hasOnlySubstanceUnits="false" boundaryCondition="false" constant="false">
        <notes>
          <body xmlns="http://www.w3.org/1999/xhtml">
            <p>FORMULA: C20H39O2</p>
            <p>CHARGE: 0</p>
          </body>
        </notes>
      </species>
      <species id="M_arach_e" name="Arachidic acid" compartment="e" hasOnlySubstanceUnits="false" boundaryCondition="false" constant="false">
        <notes>
          <body xmlns="http://www.w3.org/1999/xhtml">
            <p>FORMULA: C20H39O2</p>
            <p>CHARGE: 0</p>
          </body>
        </notes>
      </species>
      <species id="M_arachcoa_c" name="arachidyl coenzyme A" compartment="c" hasOnlySubstanceUnits="false" boundaryCondition="false" constant="false">
        <notes>
          <body xmlns="http://www.w3.org/1999/xhtml">
            <p>FORMULA: C41H70N7O17P3S</p>
            <p>CHARGE: 0</p>
          </body>
        </notes>
      </species>
      <species id="M_arachcrn_c" name="arachidyl carnitine" compartment="c" hasOnlySubstanceUnits="false" boundaryCondition="false" constant="false">
        <notes>
          <body xmlns="http://www.w3.org/1999/xhtml">
            <p>FORMULA: C27H53NO4</p>
            <p>CHARGE: 0</p>
          </body>
        </notes>
      </species>
      <species id="M_arachd_c" name="arachidonic acid" compartment="c" hasOnlySubstanceUnits="false" boundaryCondition="false" constant="false">
        <notes>
          <body xmlns="http://www.w3.org/1999/xhtml">
            <p>FORMULA: C20H31O2</p>
            <p>CHARGE: 0</p>
          </body>
        </notes>
      </species>
      <species id="M_arachd_e" name="arachidonic acid" compartment="e" hasOnlySubstanceUnits="false" boundaryCondition="false" constant="false">
        <notes>
          <body xmlns="http://www.w3.org/1999/xhtml">
            <p>FORMULA: C20H31O2</p>
            <p>CHARGE: 0</p>
          </body>
        </notes>
      </species>
      <species id="M_arachdcoa_c" name="C20:4-CoA" compartment="c" hasOnlySubstanceUnits="false" boundaryCondition="false" constant="false">
        <notes>
          <body xmlns="http://www.w3.org/1999/xhtml">
            <p>FORMULA: C41H62N7O17P3S</p>
            <p>CHARGE: 0</p>
          </body>
        </notes>
      </species>
      <species id="M_arachdcrn_c" name="C20:4 carnitine" compartment="c" hasOnlySubstanceUnits="false" boundaryCondition="false" constant="false">
        <notes>
          <body xmlns="http://www.w3.org/1999/xhtml">
            <p>FORMULA: C27H45NO4</p>
            <p>CHARGE: 0</p>
          </body>
        </notes>
      </species>
      <species id="M_arg_DASH_D_c" name="D-Arginine" compartment="c" hasOnlySubstanceUnits="false" boundaryCondition="false" constant="false">
        <notes>
          <body xmlns="http://www.w3.org/1999/xhtml">
            <p>FORMULA: C6H15N4O2</p>
            <p>CHARGE: 0</p>
          </body>
        </notes>
      </species>
      <species id="M_arg_DASH_L_c" name="L-Arginine" compartment="c" hasOnlySubstanceUnits="false" boundaryCondition="false" constant="false">
        <notes>
          <body xmlns="http://www.w3.org/1999/xhtml">
            <p>FORMULA: C6H15N4O2</p>
            <p>CHARGE: 0</p>
          </body>
        </notes>
      </species>
      <species id="M_arg_DASH_L_e" name="L-Arginine" compartment="e" hasOnlySubstanceUnits="false" boundaryCondition="false" constant="false">
        <notes>
          <body xmlns="http://www.w3.org/1999/xhtml">
            <p>FORMULA: C6H15N4O2</p>
            <p>CHARGE: 0</p>
          </body>
        </notes>
      </species>
      <species id="M_argsuc_c" name="N(omega)-(L-Arginino)succinate" compartment="c" hasOnlySubstanceUnits="false" boundaryCondition="false" constant="false">
        <notes>
          <body xmlns="http://www.w3.org/1999/xhtml">
            <p>FORMULA: C10H17N4O6</p>
            <p>CHARGE: 0</p>
          </body>
        </notes>
      </species>
      <species id="M_ascb_DASH_L_c" name="L-Ascorbate" compartment="c" hasOnlySubstanceUnits="false" boundaryCondition="false" constant="false">
        <notes>
          <body xmlns="http://www.w3.org/1999/xhtml">
            <p>FORMULA: C6H8O6</p>
            <p>CHARGE: 0</p>
          </body>
        </notes>
      </species>
      <species id="M_ascb_DASH_L_e" name="L-Ascorbate" compartment="e" hasOnlySubstanceUnits="false" boundaryCondition="false" constant="false">
        <notes>
          <body xmlns="http://www.w3.org/1999/xhtml">
            <p>FORMULA: C6H8O6</p>
            <p>CHARGE: 0</p>
          </body>
        </notes>
      </species>
      <species id="M_asn_DASH_L_c" name="L-Asparagine" compartment="c" hasOnlySubstanceUnits="false" boundaryCondition="false" constant="false">
        <notes>
          <body xmlns="http://www.w3.org/1999/xhtml">
            <p>FORMULA: C4H8N2O3</p>
            <p>CHARGE: 0</p>
          </body>
        </notes>
      </species>
      <species id="M_asn_DASH_L_e" name="L-Asparagine" compartment="e" hasOnlySubstanceUnits="false" boundaryCondition="false" constant="false">
        <notes>
          <body xmlns="http://www.w3.org/1999/xhtml">
            <p>FORMULA: C4H8N2O3</p>
            <p>CHARGE: 0</p>
          </body>
        </notes>
      </species>
      <species id="M_asp_DASH_D_c" name="D-Aspartate" compartment="c" hasOnlySubstanceUnits="false" boundaryCondition="false" constant="false">
        <notes>
          <body xmlns="http://www.w3.org/1999/xhtml">
            <p>FORMULA: C4H6NO4</p>
            <p>CHARGE: 0</p>
          </body>
        </notes>
      </species>
      <species id="M_asp_DASH_D_e" name="D-Aspartate" compartment="e" hasOnlySubstanceUnits="false" boundaryCondition="false" constant="false">
        <notes>
          <body xmlns="http://www.w3.org/1999/xhtml">
            <p>FORMULA: C4H6NO4</p>
            <p>CHARGE: 0</p>
          </body>
        </notes>
      </species>
      <species id="M_asp_DASH_L_c" name="L-Aspartate" compartment="c" hasOnlySubstanceUnits="false" boundaryCondition="false" constant="false">
        <notes>
          <body xmlns="http://www.w3.org/1999/xhtml">
            <p>FORMULA: C4H6NO4</p>
            <p>CHARGE: 0</p>
          </body>
        </notes>
      </species>
      <species id="M_asp_DASH_L_e" name="L-Aspartate" compartment="e" hasOnlySubstanceUnits="false" boundaryCondition="false" constant="false">
        <notes>
          <body xmlns="http://www.w3.org/1999/xhtml">
            <p>FORMULA: C4H6NO4</p>
            <p>CHARGE: 0</p>
          </body>
        </notes>
      </species>
      <species id="M_atp_c" name="ATP" compartment="c" hasOnlySubstanceUnits="false" boundaryCondition="false" constant="false">
        <notes>
          <body xmlns="http://www.w3.org/1999/xhtml">
            <p>FORMULA: C10H12N5O13P3</p>
            <p>CHARGE: 0</p>
          </body>
        </notes>
      </species>
      <species id="M_atp_e" name="ATP" compartment="e" hasOnlySubstanceUnits="false" boundaryCondition="false" constant="false">
        <notes>
          <body xmlns="http://www.w3.org/1999/xhtml">
            <p>FORMULA: C10H12N5O13P3</p>
            <p>CHARGE: 0</p>
          </body>
        </notes>
      </species>
      <species id="M_avite1_c" name="alpha-Tocopherol" compartment="c" hasOnlySubstanceUnits="false" boundaryCondition="false" constant="false">
        <notes>
          <body xmlns="http://www.w3.org/1999/xhtml">
            <p>FORMULA: C29H50O2</p>
            <p>CHARGE: 0</p>
          </body>
        </notes>
      </species>
      <species id="M_avite1_e" name="alpha-Tocopherol" compartment="e" hasOnlySubstanceUnits="false" boundaryCondition="false" constant="false">
        <notes>
          <body xmlns="http://www.w3.org/1999/xhtml">
            <p>FORMULA: C29H50O2</p>
            <p>CHARGE: 0</p>
          </body>
        </notes>
      </species>
      <species id="M_avite2_c" name="alpha-Tocotrienol" compartment="c" hasOnlySubstanceUnits="false" boundaryCondition="false" constant="false">
        <notes>
          <body xmlns="http://www.w3.org/1999/xhtml">
            <p>FORMULA: C29H44O2</p>
            <p>CHARGE: 0</p>
          </body>
        </notes>
      </species>
      <species id="M_avite2_e" name="alpha-Tocotrienol" compartment="e" hasOnlySubstanceUnits="false" boundaryCondition="false" constant="false">
        <notes>
          <body xmlns="http://www.w3.org/1999/xhtml">
            <p>FORMULA: C29H44O2</p>
            <p>CHARGE: 0</p>
          </body>
        </notes>
      </species>
      <species id="M_b2coa_c" name="Crotonoyl-CoA" compartment="c" hasOnlySubstanceUnits="false" boundaryCondition="false" constant="false">
        <notes>
          <body xmlns="http://www.w3.org/1999/xhtml">
            <p>FORMULA: C25H36N7O17P3S</p>
            <p>CHARGE: 0</p>
          </body>
        </notes>
      </species>
      <species id="M_bamppald_c" name="beta-Aminopropion aldehyde" compartment="c" hasOnlySubstanceUnits="false" boundaryCondition="false" constant="false">
        <notes>
          <body xmlns="http://www.w3.org/1999/xhtml">
            <p>FORMULA: C3H8NO</p>
            <p>CHARGE: 0</p>
          </body>
        </notes>
      </species>
      <species id="M_bdg2hc_c" name="cis-beta-D-Glucosyl-2-hydroxycinnamate" compartment="c" hasOnlySubstanceUnits="false" boundaryCondition="false" constant="false">
        <notes>
          <body xmlns="http://www.w3.org/1999/xhtml">
            <p>FORMULA: C15H18O8</p>
            <p>CHARGE: 0</p>
          </body>
        </notes>
      </species>
      <species id="M_betald_c" name="Betaine aldehyde" compartment="c" hasOnlySubstanceUnits="false" boundaryCondition="false" constant="false">
        <notes>
          <body xmlns="http://www.w3.org/1999/xhtml">
            <p>FORMULA: C5H12NO</p>
            <p>CHARGE: 0</p>
          </body>
        </notes>
      </species>
      <species id="M_bhb_c" name="(R)-3-Hydroxybutanoate" compartment="c" hasOnlySubstanceUnits="false" boundaryCondition="false" constant="false">
        <notes>
          <body xmlns="http://www.w3.org/1999/xhtml">
            <p>FORMULA: C4H7O3</p>
            <p>CHARGE: 0</p>
          </body>
        </notes>
      </species>
      <species id="M_bhb_e" name="(R)-3-Hydroxybutanoate" compartment="e" hasOnlySubstanceUnits="false" boundaryCondition="false" constant="false">
        <notes>
          <body xmlns="http://www.w3.org/1999/xhtml">
            <p>FORMULA: C4H7O3</p>
            <p>CHARGE: 0</p>
          </body>
        </notes>
      </species>
      <species id="M_bildglcur_c" name="Bilirubin beta-diglucuronide" compartment="c" hasOnlySubstanceUnits="false" boundaryCondition="false" constant="false">
        <notes>
          <body xmlns="http://www.w3.org/1999/xhtml">
            <p>FORMULA: C45H50N4O18</p>
            <p>CHARGE: 0</p>
          </body>
        </notes>
      </species>
      <species id="M_bildglcur_e" name="Bilirubin beta-diglucuronide" compartment="e" hasOnlySubstanceUnits="false" boundaryCondition="false" constant="false">
        <notes>
          <body xmlns="http://www.w3.org/1999/xhtml">
            <p>FORMULA: C45H50N4O18</p>
            <p>CHARGE: 0</p>
          </body>
        </notes>
      </species>
      <species id="M_bilglcur_c" name="Bilirubin monoglucuronide" compartment="c" hasOnlySubstanceUnits="false" boundaryCondition="false" constant="false">
        <notes>
          <body xmlns="http://www.w3.org/1999/xhtml">
            <p>FORMULA: C39H44N4O12</p>
            <p>CHARGE: 0</p>
          </body>
        </notes>
      </species>
      <species id="M_bilglcur_e" name="Bilirubin monoglucuronide" compartment="e" hasOnlySubstanceUnits="false" boundaryCondition="false" constant="false">
        <notes>
          <body xmlns="http://www.w3.org/1999/xhtml">
            <p>FORMULA: C39H44N4O12</p>
            <p>CHARGE: 0</p>
          </body>
        </notes>
      </species>
      <species id="M_bilirub_c" name="Bilirubin" compartment="c" hasOnlySubstanceUnits="false" boundaryCondition="false" constant="false">
        <notes>
          <body xmlns="http://www.w3.org/1999/xhtml">
            <p>FORMULA: C33H34N4O6</p>
            <p>CHARGE: 0</p>
          </body>
        </notes>
      </species>
      <species id="M_bilirub_e" name="Bilirubin" compartment="e" hasOnlySubstanceUnits="false" boundaryCondition="false" constant="false">
        <notes>
          <body xmlns="http://www.w3.org/1999/xhtml">
            <p>FORMULA: C33H34N4O6</p>
            <p>CHARGE: 0</p>
          </body>
        </notes>
      </species>
      <species id="M_biliverd_c" name="Biliverdin" compartment="c" hasOnlySubstanceUnits="false" boundaryCondition="false" constant="false">
        <notes>
          <body xmlns="http://www.w3.org/1999/xhtml">
            <p>FORMULA: C33H32N4O6</p>
            <p>CHARGE: 0</p>
          </body>
        </notes>
      </species>
      <species id="M_biocyt_c" name="Biocytin" compartment="c" hasOnlySubstanceUnits="false" boundaryCondition="false" constant="false">
        <notes>
          <body xmlns="http://www.w3.org/1999/xhtml">
            <p>FORMULA: C16H28N4O4S</p>
            <p>CHARGE: 0</p>
          </body>
        </notes>
      </species>
      <species id="M_biocyt_e" name="Biocytin" compartment="e" hasOnlySubstanceUnits="false" boundaryCondition="false" constant="false">
        <notes>
          <body xmlns="http://www.w3.org/1999/xhtml">
            <p>FORMULA: C16H28N4O4S</p>
            <p>CHARGE: 0</p>
          </body>
        </notes>
      </species>
      <species id="M_btamp_c" name="Biotinyl-5&apos;-AMP" compartment="c" hasOnlySubstanceUnits="false" boundaryCondition="false" constant="false">
        <notes>
          <body xmlns="http://www.w3.org/1999/xhtml">
            <p>FORMULA: C20H27N7O9PS</p>
            <p>CHARGE: 0</p>
          </body>
        </notes>
      </species>
      <species id="M_btcoa_c" name="Butanoyl-CoA" compartment="c" hasOnlySubstanceUnits="false" boundaryCondition="false" constant="false">
        <notes>
          <body xmlns="http://www.w3.org/1999/xhtml">
            <p>FORMULA: C25H38N7O17P3S</p>
            <p>CHARGE: 0</p>
          </body>
        </notes>
      </species>
      <species id="M_btn_c" name="Biotin" compartment="c" hasOnlySubstanceUnits="false" boundaryCondition="false" constant="false">
        <notes>
          <body xmlns="http://www.w3.org/1999/xhtml">
            <p>FORMULA: C10H15N2O3S</p>
            <p>CHARGE: 0</p>
          </body>
        </notes>
      </species>
      <species id="M_btn_e" name="Biotin" compartment="e" hasOnlySubstanceUnits="false" boundaryCondition="false" constant="false">
        <notes>
          <body xmlns="http://www.w3.org/1999/xhtml">
            <p>FORMULA: C10H15N2O3S</p>
            <p>CHARGE: 0</p>
          </body>
        </notes>
      </species>
      <species id="M_but_c" name="Butyrate (n-C4:0)" compartment="c" hasOnlySubstanceUnits="false" boundaryCondition="false" constant="false">
        <notes>
          <body xmlns="http://www.w3.org/1999/xhtml">
            <p>FORMULA: C4H7O2</p>
            <p>CHARGE: 0</p>
          </body>
        </notes>
      </species>
      <species id="M_but_e" name="Butyrate (n-C4:0)" compartment="e" hasOnlySubstanceUnits="false" boundaryCondition="false" constant="false">
        <notes>
          <body xmlns="http://www.w3.org/1999/xhtml">
            <p>FORMULA: C4H7O2</p>
            <p>CHARGE: 0</p>
          </body>
        </notes>
      </species>
      <species id="M_bvite_c" name="beta-tocopherol" compartment="c" hasOnlySubstanceUnits="false" boundaryCondition="false" constant="false">
        <notes>
          <body xmlns="http://www.w3.org/1999/xhtml">
            <p>FORMULA: C28H48O2</p>
            <p>CHARGE: 0</p>
          </body>
        </notes>
      </species>
      <species id="M_bvite_e" name="beta-tocopherol" compartment="e" hasOnlySubstanceUnits="false" boundaryCondition="false" constant="false">
        <notes>
          <body xmlns="http://www.w3.org/1999/xhtml">
            <p>FORMULA: C28H48O2</p>
            <p>CHARGE: 0</p>
          </body>
        </notes>
      </species>
      <species id="M_bz_c" name="Benzoate" compartment="c" hasOnlySubstanceUnits="false" boundaryCondition="false" constant="false">
        <notes>
          <body xmlns="http://www.w3.org/1999/xhtml">
            <p>FORMULA: C7H5O2</p>
            <p>CHARGE: 0</p>
          </body>
        </notes>
      </species>
      <species id="M_bz_e" name="Benzoate" compartment="e" hasOnlySubstanceUnits="false" boundaryCondition="false" constant="false">
        <notes>
          <body xmlns="http://www.w3.org/1999/xhtml">
            <p>FORMULA: C7H5O2</p>
            <p>CHARGE: 0</p>
          </body>
        </notes>
      </species>
      <species id="M_c226coa_c" name="cervonyl coenzyme A" compartment="c" hasOnlySubstanceUnits="false" boundaryCondition="false" constant="false">
        <notes>
          <body xmlns="http://www.w3.org/1999/xhtml">
            <p>FORMULA: C43H62N7O17P3S</p>
            <p>CHARGE: 0</p>
          </body>
        </notes>
      </species>
      <species id="M_c226crn_c" name="cervonyl carnitine" compartment="c" hasOnlySubstanceUnits="false" boundaryCondition="false" constant="false">
        <notes>
          <body xmlns="http://www.w3.org/1999/xhtml">
            <p>FORMULA: C29H45NO4</p>
            <p>CHARGE: 0</p>
          </body>
        </notes>
      </species>
      <species id="M_c2m26dcoa_c" name="cis-2-Methyl-5-isopropylhexa-2,5-dienoyl-CoA" compartment="c" hasOnlySubstanceUnits="false" boundaryCondition="false" constant="false">
        <notes>
          <body xmlns="http://www.w3.org/1999/xhtml">
            <p>FORMULA: C31H46N7O17P3S</p>
            <p>CHARGE: 0</p>
          </body>
        </notes>
      </species>
      <species id="M_ca2_c" name="Calcium" compartment="c" hasOnlySubstanceUnits="false" boundaryCondition="false" constant="false">
        <notes>
          <body xmlns="http://www.w3.org/1999/xhtml">
            <p>FORMULA: Ca</p>
            <p>CHARGE: 0</p>
          </body>
        </notes>
      </species>
      <species id="M_ca2_e" name="Calcium" compartment="e" hasOnlySubstanceUnits="false" boundaryCondition="false" constant="false">
        <notes>
          <body xmlns="http://www.w3.org/1999/xhtml">
            <p>FORMULA: Ca</p>
            <p>CHARGE: 0</p>
          </body>
        </notes>
      </species>
      <species id="M_cala_c" name="N-Carbamoyl-beta-alanine" compartment="c" hasOnlySubstanceUnits="false" boundaryCondition="false" constant="false">
        <notes>
          <body xmlns="http://www.w3.org/1999/xhtml">
            <p>FORMULA: C4H7N2O3</p>
            <p>CHARGE: 0</p>
          </body>
        </notes>
      </species>
      <species id="M_camp_c" name="cAMP" compartment="c" hasOnlySubstanceUnits="false" boundaryCondition="false" constant="false">
        <notes>
          <body xmlns="http://www.w3.org/1999/xhtml">
            <p>FORMULA: C10H11N5O6P</p>
            <p>CHARGE: 0</p>
          </body>
        </notes>
      </species>
      <species id="M_camp_e" name="cAMP" compartment="e" hasOnlySubstanceUnits="false" boundaryCondition="false" constant="false">
        <notes>
          <body xmlns="http://www.w3.org/1999/xhtml">
            <p>FORMULA: C10H11N5O6P</p>
            <p>CHARGE: 0</p>
          </body>
        </notes>
      </species>
      <species id="M_carn_c" name="L-Carnosine" compartment="c" hasOnlySubstanceUnits="false" boundaryCondition="false" constant="false">
        <notes>
          <body xmlns="http://www.w3.org/1999/xhtml">
            <p>FORMULA: C9H14N4O3</p>
            <p>CHARGE: 0</p>
          </body>
        </notes>
      </species>
      <species id="M_caro_c" name="beta-Carotene" compartment="c" hasOnlySubstanceUnits="false" boundaryCondition="false" constant="false">
        <notes>
          <body xmlns="http://www.w3.org/1999/xhtml">
            <p>FORMULA: C40H56</p>
            <p>CHARGE: 0</p>
          </body>
        </notes>
      </species>
      <species id="M_caro_e" name="beta-Carotene" compartment="e" hasOnlySubstanceUnits="false" boundaryCondition="false" constant="false">
        <notes>
          <body xmlns="http://www.w3.org/1999/xhtml">
            <p>FORMULA: C40H56</p>
            <p>CHARGE: 0</p>
          </body>
        </notes>
      </species>
      <species id="M_carveol_c" name="(E)-carveol" compartment="c" hasOnlySubstanceUnits="false" boundaryCondition="false" constant="false">
        <notes>
          <body xmlns="http://www.w3.org/1999/xhtml">
            <p>FORMULA: C10H16O</p>
            <p>CHARGE: 0</p>
          </body>
        </notes>
      </species>
      <species id="M_carveol_e" name="(E)-carveol" compartment="e" hasOnlySubstanceUnits="false" boundaryCondition="false" constant="false">
        <notes>
          <body xmlns="http://www.w3.org/1999/xhtml">
            <p>FORMULA: C10H16O</p>
            <p>CHARGE: 0</p>
          </body>
        </notes>
      </species>
      <species id="M_cbasp_c" name="N-Carbamoyl-L-aspartate" compartment="c" hasOnlySubstanceUnits="false" boundaryCondition="false" constant="false">
        <notes>
          <body xmlns="http://www.w3.org/1999/xhtml">
            <p>FORMULA: C5H6N2O5</p>
            <p>CHARGE: 0</p>
          </body>
        </notes>
      </species>
      <species id="M_cbl1_c" name="Cob(I)alamin" compartment="c" hasOnlySubstanceUnits="false" boundaryCondition="false" constant="false">
        <notes>
          <body xmlns="http://www.w3.org/1999/xhtml">
            <p>FORMULA: C62H88CoN13O14P</p>
            <p>CHARGE: 0</p>
          </body>
        </notes>
      </species>
      <species id="M_cbl2_c" name="Cob(II)alamin" compartment="c" hasOnlySubstanceUnits="false" boundaryCondition="false" constant="false">
        <notes>
          <body xmlns="http://www.w3.org/1999/xhtml">
            <p>FORMULA: C62H92CoN13O14P</p>
            <p>CHARGE: 0</p>
          </body>
        </notes>
      </species>
      <species id="M_cbp_c" name="Carbamoyl phosphate" compartment="c" hasOnlySubstanceUnits="false" boundaryCondition="false" constant="false">
        <notes>
          <body xmlns="http://www.w3.org/1999/xhtml">
            <p>FORMULA: CH2NO5P</p>
            <p>CHARGE: 0</p>
          </body>
        </notes>
      </species>
      <species id="M_cca_d3_c" name="Calcitroic acid (D3)" compartment="c" hasOnlySubstanceUnits="false" boundaryCondition="false" constant="false">
        <notes>
          <body xmlns="http://www.w3.org/1999/xhtml">
            <p>FORMULA: C22H33O4</p>
            <p>CHARGE: 0</p>
          </body>
        </notes>
      </species>
      <species id="M_cca_d3_e" name="Calcitroic acid (D3)" compartment="e" hasOnlySubstanceUnits="false" boundaryCondition="false" constant="false">
        <notes>
          <body xmlns="http://www.w3.org/1999/xhtml">
            <p>FORMULA: C22H33O4</p>
            <p>CHARGE: 0</p>
          </body>
        </notes>
      </species>
      <species id="M_cdp_c" name="CDP" compartment="c" hasOnlySubstanceUnits="false" boundaryCondition="false" constant="false">
        <notes>
          <body xmlns="http://www.w3.org/1999/xhtml">
            <p>FORMULA: C9H12N3O11P2</p>
            <p>CHARGE: 0</p>
          </body>
        </notes>
      </species>
      <species id="M_cdpchol_c" name="CDPcholine" compartment="c" hasOnlySubstanceUnits="false" boundaryCondition="false" constant="false">
        <notes>
          <body xmlns="http://www.w3.org/1999/xhtml">
            <p>FORMULA: C14H25N4O11P2</p>
            <p>CHARGE: 0</p>
          </body>
        </notes>
      </species>
      <species id="M_cdpdag_hs_c" name="CDP diacylglycerol (homo sapiens)" compartment="c" hasOnlySubstanceUnits="false" boundaryCondition="false" constant="false">
        <notes>
          <body xmlns="http://www.w3.org/1999/xhtml">
            <p>FORMULA: C12H17N3O11P2FULLRCO2FULLR2CO2</p>
            <p>CHARGE: 0</p>
          </body>
        </notes>
      </species>
      <species id="M_cdpea_c" name="CDPethanolamine" compartment="c" hasOnlySubstanceUnits="false" boundaryCondition="false" constant="false">
        <notes>
          <body xmlns="http://www.w3.org/1999/xhtml">
            <p>FORMULA: C11H19N4O11P2</p>
            <p>CHARGE: 0</p>
          </body>
        </notes>
      </species>
      <species id="M_cgly_c" name="Cys-Gly" compartment="c" hasOnlySubstanceUnits="false" boundaryCondition="false" constant="false">
        <notes>
          <body xmlns="http://www.w3.org/1999/xhtml">
            <p>FORMULA: C5H10N2O3S</p>
            <p>CHARGE: 0</p>
          </body>
        </notes>
      </species>
      <species id="M_cgly_e" name="Cys-Gly" compartment="e" hasOnlySubstanceUnits="false" boundaryCondition="false" constant="false">
        <notes>
          <body xmlns="http://www.w3.org/1999/xhtml">
            <p>FORMULA: C5H10N2O3S</p>
            <p>CHARGE: 0</p>
          </body>
        </notes>
      </species>
      <species id="M_chito2pdol_L_c" name="N,N&apos;-Diacetylchitobiosyldiphosphodolichol, human liver homolog" compartment="c" hasOnlySubstanceUnits="false" boundaryCondition="false" constant="false">
        <notes>
          <body xmlns="http://www.w3.org/1999/xhtml">
            <p>FORMULA: C1240H2028N20O170P20</p>
            <p>CHARGE: 0</p>
          </body>
        </notes>
      </species>
      <species id="M_chito2pdol_U_c" name="N,N&apos;-Diacetylchitobiosyldiphosphodolichol, human uterine homolog" compartment="c" hasOnlySubstanceUnits="false" boundaryCondition="false" constant="false">
        <notes>
          <body xmlns="http://www.w3.org/1999/xhtml">
            <p>FORMULA: C1185H1940N20O170P20</p>
            <p>CHARGE: 0</p>
          </body>
        </notes>
      </species>
      <species id="M_chlstol_c" name="Cholesta-7,24-dien-3beta-ol" compartment="c" hasOnlySubstanceUnits="false" boundaryCondition="false" constant="false">
        <notes>
          <body xmlns="http://www.w3.org/1999/xhtml">
            <p>FORMULA: C27H44O</p>
            <p>CHARGE: 0</p>
          </body>
        </notes>
      </species>
      <species id="M_chol_c" name="Choline" compartment="c" hasOnlySubstanceUnits="false" boundaryCondition="false" constant="false">
        <notes>
          <body xmlns="http://www.w3.org/1999/xhtml">
            <p>FORMULA: C5H14NO</p>
            <p>CHARGE: 0</p>
          </body>
        </notes>
      </species>
      <species id="M_chol_e" name="Choline" compartment="e" hasOnlySubstanceUnits="false" boundaryCondition="false" constant="false">
        <notes>
          <body xmlns="http://www.w3.org/1999/xhtml">
            <p>FORMULA: C5H14NO</p>
            <p>CHARGE: 0</p>
          </body>
        </notes>
      </species>
      <species id="M_cholate_c" name="Cholate" compartment="c" hasOnlySubstanceUnits="false" boundaryCondition="false" constant="false">
        <notes>
          <body xmlns="http://www.w3.org/1999/xhtml">
            <p>FORMULA: C24H39O5</p>
            <p>CHARGE: 0</p>
          </body>
        </notes>
      </species>
      <species id="M_cholate_e" name="Cholate" compartment="e" hasOnlySubstanceUnits="false" boundaryCondition="false" constant="false">
        <notes>
          <body xmlns="http://www.w3.org/1999/xhtml">
            <p>FORMULA: C24H39O5</p>
            <p>CHARGE: 0</p>
          </body>
        </notes>
      </species>
      <species id="M_cholcoa_c" name="Choloyl-CoA" compartment="c" hasOnlySubstanceUnits="false" boundaryCondition="false" constant="false">
        <notes>
          <body xmlns="http://www.w3.org/1999/xhtml">
            <p>FORMULA: C45H70N7O20P3S</p>
            <p>CHARGE: 0</p>
          </body>
        </notes>
      </species>
      <species id="M_cholcoads_c" name="3alpha,7alpha,12alpha-Trihydroxy-5beta-cholest-24-enoyl-CoA" compartment="c" hasOnlySubstanceUnits="false" boundaryCondition="false" constant="false">
        <notes>
          <body xmlns="http://www.w3.org/1999/xhtml">
            <p>FORMULA: C48H74N7O20P3S</p>
            <p>CHARGE: 0</p>
          </body>
        </notes>
      </species>
      <species id="M_cholcoaone_c" name="3alpha,7alpha,12alpha-Trihydroxy-5beta-24-oxocholestanoyl-CoA" compartment="c" hasOnlySubstanceUnits="false" boundaryCondition="false" constant="false">
        <notes>
          <body xmlns="http://www.w3.org/1999/xhtml">
            <p>FORMULA: C48H74N7O21P3S</p>
            <p>CHARGE: 0</p>
          </body>
        </notes>
      </species>
      <species id="M_cholcoar_c" name="3alpha,7alpha,12alpha-Trihydroxy-5beta-cholestanoyl-CoA" compartment="c" hasOnlySubstanceUnits="false" boundaryCondition="false" constant="false">
        <notes>
          <body xmlns="http://www.w3.org/1999/xhtml">
            <p>FORMULA: C48H76N7O20P3S</p>
            <p>CHARGE: 0</p>
          </body>
        </notes>
      </species>
      <species id="M_cholcoas_c" name="3alpha,7alpha,12alpha-Trihydroxy-5beta-cholestanoyl-CoA(S)" compartment="c" hasOnlySubstanceUnits="false" boundaryCondition="false" constant="false">
        <notes>
          <body xmlns="http://www.w3.org/1999/xhtml">
            <p>FORMULA: C48H76N7O20P3S</p>
            <p>CHARGE: 0</p>
          </body>
        </notes>
      </species>
      <species id="M_cholp_c" name="Choline phosphate" compartment="c" hasOnlySubstanceUnits="false" boundaryCondition="false" constant="false">
        <notes>
          <body xmlns="http://www.w3.org/1999/xhtml">
            <p>FORMULA: C5H13NO4P</p>
            <p>CHARGE: 0</p>
          </body>
        </notes>
      </species>
      <species id="M_chsterol_c" name="Cholesterol" compartment="c" hasOnlySubstanceUnits="false" boundaryCondition="false" constant="false">
        <notes>
          <body xmlns="http://www.w3.org/1999/xhtml">
            <p>FORMULA: C27H46O</p>
            <p>CHARGE: 0</p>
          </body>
        </notes>
      </species>
      <species id="M_chsterol_e" name="Cholesterol" compartment="e" hasOnlySubstanceUnits="false" boundaryCondition="false" constant="false">
        <notes>
          <body xmlns="http://www.w3.org/1999/xhtml">
            <p>FORMULA: C27H46O</p>
            <p>CHARGE: 0</p>
          </body>
        </notes>
      </species>
      <species id="M_chsterols_c" name="cholesterol sulfate" compartment="c" hasOnlySubstanceUnits="false" boundaryCondition="false" constant="false">
        <notes>
          <body xmlns="http://www.w3.org/1999/xhtml">
            <p>FORMULA: C27H45O4S</p>
            <p>CHARGE: 0</p>
          </body>
        </notes>
      </species>
      <species id="M_chtn_c" name="chitin" compartment="c" hasOnlySubstanceUnits="false" boundaryCondition="false" constant="false">
        <notes>
          <body xmlns="http://www.w3.org/1999/xhtml">
            <p>FORMULA: C24H41N3O16</p>
            <p>CHARGE: 0</p>
          </body>
        </notes>
      </species>
      <species id="M_chtn_e" name="chitin" compartment="e" hasOnlySubstanceUnits="false" boundaryCondition="false" constant="false">
        <notes>
          <body xmlns="http://www.w3.org/1999/xhtml">
            <p>FORMULA: C24H41N3O16</p>
            <p>CHARGE: 0</p>
          </body>
        </notes>
      </species>
      <species id="M_cit_c" name="Citrate" compartment="c" hasOnlySubstanceUnits="false" boundaryCondition="false" constant="false">
        <notes>
          <body xmlns="http://www.w3.org/1999/xhtml">
            <p>FORMULA: C6H5O7</p>
            <p>CHARGE: 0</p>
          </body>
        </notes>
      </species>
      <species id="M_cit_e" name="Citrate" compartment="e" hasOnlySubstanceUnits="false" boundaryCondition="false" constant="false">
        <notes>
          <body xmlns="http://www.w3.org/1999/xhtml">
            <p>FORMULA: C6H5O7</p>
            <p>CHARGE: 0</p>
          </body>
        </notes>
      </species>
      <species id="M_citmcoa_DASH_L_c" name="L-Citramalyl-CoA" compartment="c" hasOnlySubstanceUnits="false" boundaryCondition="false" constant="false">
        <notes>
          <body xmlns="http://www.w3.org/1999/xhtml">
            <p>FORMULA: C26H37N7O20P3S</p>
            <p>CHARGE: 0</p>
          </body>
        </notes>
      </species>
      <species id="M_citr_DASH_L_c" name="L-Citrulline" compartment="c" hasOnlySubstanceUnits="false" boundaryCondition="false" constant="false">
        <notes>
          <body xmlns="http://www.w3.org/1999/xhtml">
            <p>FORMULA: C6H13N3O3</p>
            <p>CHARGE: 0</p>
          </body>
        </notes>
      </species>
      <species id="M_cl_c" name="Chloride" compartment="c" hasOnlySubstanceUnits="false" boundaryCondition="false" constant="false">
        <notes>
          <body xmlns="http://www.w3.org/1999/xhtml">
            <p>FORMULA: Cl</p>
            <p>CHARGE: 0</p>
          </body>
        </notes>
      </species>
      <species id="M_cl_e" name="Chloride" compartment="e" hasOnlySubstanceUnits="false" boundaryCondition="false" constant="false">
        <notes>
          <body xmlns="http://www.w3.org/1999/xhtml">
            <p>FORMULA: Cl</p>
            <p>CHARGE: 0</p>
          </body>
        </notes>
      </species>
      <species id="M_clpnd_c" name="clupanodonic acid" compartment="c" hasOnlySubstanceUnits="false" boundaryCondition="false" constant="false">
        <notes>
          <body xmlns="http://www.w3.org/1999/xhtml">
            <p>FORMULA: C22H33O2</p>
            <p>CHARGE: 0</p>
          </body>
        </notes>
      </species>
      <species id="M_clpnd_e" name="clupanodonic acid" compartment="e" hasOnlySubstanceUnits="false" boundaryCondition="false" constant="false">
        <notes>
          <body xmlns="http://www.w3.org/1999/xhtml">
            <p>FORMULA: C22H33O2</p>
            <p>CHARGE: 0</p>
          </body>
        </notes>
      </species>
      <species id="M_clpndcoa_c" name="clupanodonyl CoA" compartment="c" hasOnlySubstanceUnits="false" boundaryCondition="false" constant="false">
        <notes>
          <body xmlns="http://www.w3.org/1999/xhtml">
            <p>FORMULA: C43H64N7O17P3S</p>
            <p>CHARGE: 0</p>
          </body>
        </notes>
      </species>
      <species id="M_clpndcrn_c" name="clupanodonyl carnitine" compartment="c" hasOnlySubstanceUnits="false" boundaryCondition="false" constant="false">
        <notes>
          <body xmlns="http://www.w3.org/1999/xhtml">
            <p>FORMULA: C29H47NO4</p>
            <p>CHARGE: 0</p>
          </body>
        </notes>
      </species>
      <species id="M_cmp2amep_c" name="CMP-2-aminoethylphosphonate" compartment="c" hasOnlySubstanceUnits="false" boundaryCondition="false" constant="false">
        <notes>
          <body xmlns="http://www.w3.org/1999/xhtml">
            <p>FORMULA: C11H19N4O10P2</p>
            <p>CHARGE: 0</p>
          </body>
        </notes>
      </species>
      <species id="M_cmp_c" name="CMP" compartment="c" hasOnlySubstanceUnits="false" boundaryCondition="false" constant="false">
        <notes>
          <body xmlns="http://www.w3.org/1999/xhtml">
            <p>FORMULA: C9H12N3O8P</p>
            <p>CHARGE: 0</p>
          </body>
        </notes>
      </species>
      <species id="M_cmp_e" name="CMP" compartment="e" hasOnlySubstanceUnits="false" boundaryCondition="false" constant="false">
        <notes>
          <body xmlns="http://www.w3.org/1999/xhtml">
            <p>FORMULA: C9H12N3O8P</p>
            <p>CHARGE: 0</p>
          </body>
        </notes>
      </species>
      <species id="M_cmpacna_c" name="CMP-N-acetylneuraminate" compartment="c" hasOnlySubstanceUnits="false" boundaryCondition="false" constant="false">
        <notes>
          <body xmlns="http://www.w3.org/1999/xhtml">
            <p>FORMULA: C20H29N4O16P</p>
            <p>CHARGE: 0</p>
          </body>
        </notes>
      </species>
      <species id="M_cmpntm2amep_c" name="CMP-N-trimethyl-2-aminoethylphosphonate" compartment="c" hasOnlySubstanceUnits="false" boundaryCondition="false" constant="false">
        <notes>
          <body xmlns="http://www.w3.org/1999/xhtml">
            <p>FORMULA: C14H25N4O10P2</p>
            <p>CHARGE: 0</p>
          </body>
        </notes>
      </species>
      <species id="M_cmusa_c" name="2-Amino-3-carboxymuconate semialdehyde" compartment="c" hasOnlySubstanceUnits="false" boundaryCondition="false" constant="false">
        <notes>
          <body xmlns="http://www.w3.org/1999/xhtml">
            <p>FORMULA: C7H6NO5</p>
            <p>CHARGE: 0</p>
          </body>
        </notes>
      </species>
      <species id="M_co2_c" name="CO2" compartment="c" hasOnlySubstanceUnits="false" boundaryCondition="false" constant="false">
        <notes>
          <body xmlns="http://www.w3.org/1999/xhtml">
            <p>FORMULA: CO2</p>
            <p>CHARGE: 0</p>
          </body>
        </notes>
      </species>
      <species id="M_co2_e" name="CO2" compartment="e" hasOnlySubstanceUnits="false" boundaryCondition="false" constant="false">
        <notes>
          <body xmlns="http://www.w3.org/1999/xhtml">
            <p>FORMULA: CO2</p>
            <p>CHARGE: 0</p>
          </body>
        </notes>
      </species>
      <species id="M_co_c" name="Carbon monoxide" compartment="c" hasOnlySubstanceUnits="false" boundaryCondition="false" constant="false">
        <notes>
          <body xmlns="http://www.w3.org/1999/xhtml">
            <p>FORMULA: CO</p>
            <p>CHARGE: 0</p>
          </body>
        </notes>
      </species>
      <species id="M_co_e" name="Carbon monoxide" compartment="e" hasOnlySubstanceUnits="false" boundaryCondition="false" constant="false">
        <notes>
          <body xmlns="http://www.w3.org/1999/xhtml">
            <p>FORMULA: CO</p>
            <p>CHARGE: 0</p>
          </body>
        </notes>
      </species>
      <species id="M_coa_c" name="Coenzyme A" compartment="c" hasOnlySubstanceUnits="false" boundaryCondition="false" constant="false">
        <notes>
          <body xmlns="http://www.w3.org/1999/xhtml">
            <p>FORMULA: C21H32N7O16P3S</p>
            <p>CHARGE: 0</p>
          </body>
        </notes>
      </species>
      <species id="M_coke_c" name="cocaine" compartment="c" hasOnlySubstanceUnits="false" boundaryCondition="false" constant="false">
        <notes>
          <body xmlns="http://www.w3.org/1999/xhtml">
            <p>FORMULA: C17H21NO4</p>
            <p>CHARGE: 0</p>
          </body>
        </notes>
      </species>
      <species id="M_core2_c" name="Core 2" compartment="c" hasOnlySubstanceUnits="false" boundaryCondition="false" constant="false">
        <notes>
          <body xmlns="http://www.w3.org/1999/xhtml">
            <p>FORMULA: C22H37N2O15X</p>
            <p>CHARGE: 0</p>
          </body>
        </notes>
      </species>
      <species id="M_core3_c" name="Core 3" compartment="c" hasOnlySubstanceUnits="false" boundaryCondition="false" constant="false">
        <notes>
          <body xmlns="http://www.w3.org/1999/xhtml">
            <p>FORMULA: C16H27N2O10X</p>
            <p>CHARGE: 0</p>
          </body>
        </notes>
      </species>
      <species id="M_core4_c" name="Core 4" compartment="c" hasOnlySubstanceUnits="false" boundaryCondition="false" constant="false">
        <notes>
          <body xmlns="http://www.w3.org/1999/xhtml">
            <p>FORMULA: C24H40N3O15X</p>
            <p>CHARGE: 0</p>
          </body>
        </notes>
      </species>
      <species id="M_core5_c" name="Core 5" compartment="c" hasOnlySubstanceUnits="false" boundaryCondition="false" constant="false">
        <notes>
          <body xmlns="http://www.w3.org/1999/xhtml">
            <p>FORMULA: C16H27N2O10X</p>
            <p>CHARGE: 0</p>
          </body>
        </notes>
      </species>
      <species id="M_core6_c" name="Core 6" compartment="c" hasOnlySubstanceUnits="false" boundaryCondition="false" constant="false">
        <notes>
          <body xmlns="http://www.w3.org/1999/xhtml">
            <p>FORMULA: C16H27N2O10X</p>
            <p>CHARGE: 0</p>
          </body>
        </notes>
      </species>
      <species id="M_core7_c" name="Core 7" compartment="c" hasOnlySubstanceUnits="false" boundaryCondition="false" constant="false">
        <notes>
          <body xmlns="http://www.w3.org/1999/xhtml">
            <p>FORMULA: C16H27N2O10X</p>
            <p>CHARGE: 0</p>
          </body>
        </notes>
      </species>
      <species id="M_core8_c" name="Core 8" compartment="c" hasOnlySubstanceUnits="false" boundaryCondition="false" constant="false">
        <notes>
          <body xmlns="http://www.w3.org/1999/xhtml">
            <p>FORMULA: C14H24NO10X</p>
            <p>CHARGE: 0</p>
          </body>
        </notes>
      </species>
      <species id="M_cortsn_c" name="Cortisone" compartment="c" hasOnlySubstanceUnits="false" boundaryCondition="false" constant="false">
        <notes>
          <body xmlns="http://www.w3.org/1999/xhtml">
            <p>FORMULA: C21H28O5</p>
            <p>CHARGE: 0</p>
          </body>
        </notes>
      </species>
      <species id="M_coucoa_c" name="p-coumaroyl-CoA" compartment="c" hasOnlySubstanceUnits="false" boundaryCondition="false" constant="false">
        <notes>
          <body xmlns="http://www.w3.org/1999/xhtml">
            <p>FORMULA: C30H38N7O18P3S1</p>
            <p>CHARGE: 0</p>
          </body>
        </notes>
      </species>
      <species id="M_coumarin_c" name="coumarin" compartment="c" hasOnlySubstanceUnits="false" boundaryCondition="false" constant="false">
        <notes>
          <body xmlns="http://www.w3.org/1999/xhtml">
            <p>FORMULA: C9H6O2</p>
            <p>CHARGE: 0</p>
          </body>
        </notes>
      </species>
      <species id="M_coumarin_e" name="coumarin" compartment="e" hasOnlySubstanceUnits="false" boundaryCondition="false" constant="false">
        <notes>
          <body xmlns="http://www.w3.org/1999/xhtml">
            <p>FORMULA: C9H6O2</p>
            <p>CHARGE: 0</p>
          </body>
        </notes>
      </species>
      <species id="M_cpppg3_c" name="Coproporphyrinogen III" compartment="c" hasOnlySubstanceUnits="false" boundaryCondition="false" constant="false">
        <notes>
          <body xmlns="http://www.w3.org/1999/xhtml">
            <p>FORMULA: C36H40N4O8</p>
            <p>CHARGE: 0</p>
          </body>
        </notes>
      </species>
      <species id="M_creat_c" name="Creatine" compartment="c" hasOnlySubstanceUnits="false" boundaryCondition="false" constant="false">
        <notes>
          <body xmlns="http://www.w3.org/1999/xhtml">
            <p>FORMULA: C4H9N3O2</p>
            <p>CHARGE: 0</p>
          </body>
        </notes>
      </species>
      <species id="M_creat_e" name="Creatine" compartment="e" hasOnlySubstanceUnits="false" boundaryCondition="false" constant="false">
        <notes>
          <body xmlns="http://www.w3.org/1999/xhtml">
            <p>FORMULA: C4H9N3O2</p>
            <p>CHARGE: 0</p>
          </body>
        </notes>
      </species>
      <species id="M_crm_hs_c" name="ceramide (homo sapiens)" compartment="c" hasOnlySubstanceUnits="false" boundaryCondition="false" constant="false">
        <notes>
          <body xmlns="http://www.w3.org/1999/xhtml">
            <p>FORMULA: C18H36NO2FULLRCO</p>
            <p>CHARGE: 0</p>
          </body>
        </notes>
      </species>
      <species id="M_crmp_hs_c" name="Ceramide 1-phosphate" compartment="c" hasOnlySubstanceUnits="false" boundaryCondition="false" constant="false">
        <notes>
          <body xmlns="http://www.w3.org/1999/xhtml">
            <p>FORMULA: C18H35NO5PFULLRCO</p>
            <p>CHARGE: 0</p>
          </body>
        </notes>
      </species>
      <species id="M_crmp_hs_e" name="Ceramide 1-phosphate" compartment="e" hasOnlySubstanceUnits="false" boundaryCondition="false" constant="false">
        <notes>
          <body xmlns="http://www.w3.org/1999/xhtml">
            <p>FORMULA: C18H35NO5PFULLRCO</p>
            <p>CHARGE: 0</p>
          </body>
        </notes>
      </species>
      <species id="M_crn_c" name="L-Carnitine" compartment="c" hasOnlySubstanceUnits="false" boundaryCondition="false" constant="false">
        <notes>
          <body xmlns="http://www.w3.org/1999/xhtml">
            <p>FORMULA: C7H15NO3</p>
            <p>CHARGE: 0</p>
          </body>
        </notes>
      </species>
      <species id="M_crn_e" name="L-Carnitine" compartment="e" hasOnlySubstanceUnits="false" boundaryCondition="false" constant="false">
        <notes>
          <body xmlns="http://www.w3.org/1999/xhtml">
            <p>FORMULA: C7H15NO3</p>
            <p>CHARGE: 0</p>
          </body>
        </notes>
      </species>
      <species id="M_crtn_c" name="Creatinine" compartment="c" hasOnlySubstanceUnits="false" boundaryCondition="false" constant="false">
        <notes>
          <body xmlns="http://www.w3.org/1999/xhtml">
            <p>FORMULA: C4H7N3O</p>
            <p>CHARGE: 0</p>
          </body>
        </notes>
      </species>
      <species id="M_crtsl_c" name="Cortisol" compartment="c" hasOnlySubstanceUnits="false" boundaryCondition="false" constant="false">
        <notes>
          <body xmlns="http://www.w3.org/1999/xhtml">
            <p>FORMULA: C21H30O5</p>
            <p>CHARGE: 0</p>
          </body>
        </notes>
      </species>
      <species id="M_crtstrn_c" name="Corticosterone" compartment="c" hasOnlySubstanceUnits="false" boundaryCondition="false" constant="false">
        <notes>
          <body xmlns="http://www.w3.org/1999/xhtml">
            <p>FORMULA: C21H30O4</p>
            <p>CHARGE: 0</p>
          </body>
        </notes>
      </species>
      <species id="M_crvnc_c" name="cervonic acid, C22:6 n-3" compartment="c" hasOnlySubstanceUnits="false" boundaryCondition="false" constant="false">
        <notes>
          <body xmlns="http://www.w3.org/1999/xhtml">
            <p>FORMULA: C22H31O2</p>
            <p>CHARGE: 0</p>
          </body>
        </notes>
      </species>
      <species id="M_crvnc_e" name="cervonic acid, C22:6 n-3" compartment="e" hasOnlySubstanceUnits="false" boundaryCondition="false" constant="false">
        <notes>
          <body xmlns="http://www.w3.org/1999/xhtml">
            <p>FORMULA: C22H31O2</p>
            <p>CHARGE: 0</p>
          </body>
        </notes>
      </species>
      <species id="M_cs_COMMA_hs_linkage_c" name="chondroitin sulfate/heparan sulfate linkage region (GlcA-(Gal)2-Xyl-L-Ser (protein))" compartment="c" hasOnlySubstanceUnits="false" boundaryCondition="false" constant="false">
        <notes>
          <body xmlns="http://www.w3.org/1999/xhtml">
            <p>FORMULA: C23H36O20X</p>
            <p>CHARGE: 0</p>
          </body>
        </notes>
      </species>
      <species id="M_cs_a_COMMA_b_COMMA_e_pre1_c" name="chondroitin sulfate A (GalNAc4S-GlcA), B (IdoA2S-GalNAc4S), and E (GalNAc4,6diS-GlcA), precursor 1" compartment="c" hasOnlySubstanceUnits="false" boundaryCondition="false" constant="false">
        <notes>
          <body xmlns="http://www.w3.org/1999/xhtml">
            <p>FORMULA: C31H47NO31S2X</p>
            <p>CHARGE: 0</p>
          </body>
        </notes>
      </species>
      <species id="M_cs_a_COMMA_b_pre2_c" name="chondroitin sulfate A (GalNAc4S-GlcA) and B (IdoA2S-GalNAc4S), precursor 2" compartment="c" hasOnlySubstanceUnits="false" boundaryCondition="false" constant="false">
        <notes>
          <body xmlns="http://www.w3.org/1999/xhtml">
            <p>FORMULA: C37H54NO37S2X</p>
            <p>CHARGE: 0</p>
          </body>
        </notes>
      </species>
      <species id="M_cs_a_COMMA_b_pre3_c" name="chondroitin sulfate A (GalNAc4S-GlcA) and B (IdoA2S-GalNAc4S), precursor 3" compartment="c" hasOnlySubstanceUnits="false" boundaryCondition="false" constant="false">
        <notes>
          <body xmlns="http://www.w3.org/1999/xhtml">
            <p>FORMULA: C45H67N2O42S2X</p>
            <p>CHARGE: 0</p>
          </body>
        </notes>
      </species>
      <species id="M_cs_a_c" name="chondroitin sulfate A (GalNAc4S-GlcA), free chain" compartment="c" hasOnlySubstanceUnits="false" boundaryCondition="false" constant="false">
        <notes>
          <body xmlns="http://www.w3.org/1999/xhtml">
            <p>FORMULA: C45H67N2O46S3</p>
            <p>CHARGE: 0</p>
          </body>
        </notes>
      </species>
      <species id="M_cs_a_deg1_c" name="chondroitin sulfate A (GalNAc4S-GlcA), degradation product 1" compartment="c" hasOnlySubstanceUnits="false" boundaryCondition="false" constant="false">
        <notes>
          <body xmlns="http://www.w3.org/1999/xhtml">
            <p>FORMULA: C45H68N2O43S2</p>
            <p>CHARGE: 0</p>
          </body>
        </notes>
      </species>
      <species id="M_cs_a_deg2_c" name="chondroitin sulfate A (GalNAc4S-GlcA), degradation product 2" compartment="c" hasOnlySubstanceUnits="false" boundaryCondition="false" constant="false">
        <notes>
          <body xmlns="http://www.w3.org/1999/xhtml">
            <p>FORMULA: C37H55NO38S2</p>
            <p>CHARGE: 0</p>
          </body>
        </notes>
      </species>
      <species id="M_cs_a_deg3_c" name="chondroitin sulfate A (GalNAc4S-GlcA), degradation product 3" compartment="c" hasOnlySubstanceUnits="false" boundaryCondition="false" constant="false">
        <notes>
          <body xmlns="http://www.w3.org/1999/xhtml">
            <p>FORMULA: C31H48NO32S2</p>
            <p>CHARGE: 0</p>
          </body>
        </notes>
      </species>
      <species id="M_cs_a_deg4_c" name="chondroitin sulfate A (GalNAc4S-GlcA), degradation product 4" compartment="c" hasOnlySubstanceUnits="false" boundaryCondition="false" constant="false">
        <notes>
          <body xmlns="http://www.w3.org/1999/xhtml">
            <p>FORMULA: C31H49NO29S</p>
            <p>CHARGE: 0</p>
          </body>
        </notes>
      </species>
      <species id="M_cs_a_deg5_c" name="chondroitin sulfate A (GalNAc4S-GlcA), degradation product 5" compartment="c" hasOnlySubstanceUnits="false" boundaryCondition="false" constant="false">
        <notes>
          <body xmlns="http://www.w3.org/1999/xhtml">
            <p>FORMULA: C23H36O24S</p>
            <p>CHARGE: 0</p>
          </body>
        </notes>
      </species>
      <species id="M_cs_b_c" name="chondroitin sulfate B / dermatan sulfate (IdoA2S-GalNAc4S), free chain" compartment="c" hasOnlySubstanceUnits="false" boundaryCondition="false" constant="false">
        <notes>
          <body xmlns="http://www.w3.org/1999/xhtml">
            <p>FORMULA: C45H66N2O49S4</p>
            <p>CHARGE: 0</p>
          </body>
        </notes>
      </species>
      <species id="M_cs_b_deg1_c" name="chondroitin sulfate B / dermatan sulfate (IdoA2S-GalNAc4S), degradation product 1" compartment="c" hasOnlySubstanceUnits="false" boundaryCondition="false" constant="false">
        <notes>
          <body xmlns="http://www.w3.org/1999/xhtml">
            <p>FORMULA: C45H67N2O46S3</p>
            <p>CHARGE: 0</p>
          </body>
        </notes>
      </species>
      <species id="M_cs_b_deg2_c" name="chondroitin sulfate B / dermatan sulfate (IdoA2S-GalNAc4S), degradation product 2" compartment="c" hasOnlySubstanceUnits="false" boundaryCondition="false" constant="false">
        <notes>
          <body xmlns="http://www.w3.org/1999/xhtml">
            <p>FORMULA: C37H54NO41S3</p>
            <p>CHARGE: 0</p>
          </body>
        </notes>
      </species>
      <species id="M_cs_b_deg3_c" name="chondroitin sulfate B / dermatan sulfate (IdoA2S-GalNAc4S), degradation product 3" compartment="c" hasOnlySubstanceUnits="false" boundaryCondition="false" constant="false">
        <notes>
          <body xmlns="http://www.w3.org/1999/xhtml">
            <p>FORMULA: C37H55NO38S2</p>
            <p>CHARGE: 0</p>
          </body>
        </notes>
      </species>
      <species id="M_cs_b_pre4_c" name="chondroitin sulfate B (IdoA2S-GalNAc4S), precursor 4" compartment="c" hasOnlySubstanceUnits="false" boundaryCondition="false" constant="false">
        <notes>
          <body xmlns="http://www.w3.org/1999/xhtml">
            <p>FORMULA: C45H67N2O42S2X</p>
            <p>CHARGE: 0</p>
          </body>
        </notes>
      </species>
      <species id="M_cs_b_pre5_c" name="chondroitin sulfate B (IdoA2S-GalNAc4s), precursor 5" compartment="c" hasOnlySubstanceUnits="false" boundaryCondition="false" constant="false">
        <notes>
          <body xmlns="http://www.w3.org/1999/xhtml">
            <p>FORMULA: C45H66N2O45S3X</p>
            <p>CHARGE: 0</p>
          </body>
        </notes>
      </species>
      <species id="M_cs_c_COMMA_d_COMMA_e_pre1_c" name="chondroitin sulfate C (GalNAc6S-GlcA) and D (GlcNAc6S-GlcA2S), precursor 1" compartment="c" hasOnlySubstanceUnits="false" boundaryCondition="false" constant="false">
        <notes>
          <body xmlns="http://www.w3.org/1999/xhtml">
            <p>FORMULA: C31H47NO31S2X</p>
            <p>CHARGE: 0</p>
          </body>
        </notes>
      </species>
      <species id="M_cs_c_c" name="chondroitin sulfate C (GalNAc6S-GlcA), free chain" compartment="c" hasOnlySubstanceUnits="false" boundaryCondition="false" constant="false">
        <notes>
          <body xmlns="http://www.w3.org/1999/xhtml">
            <p>FORMULA: C45H67N2O46S3</p>
            <p>CHARGE: 0</p>
          </body>
        </notes>
      </species>
      <species id="M_cs_c_deg1_c" name="chondroitin sulfate C (GalNAc6S-GlcA), degradation product 1" compartment="c" hasOnlySubstanceUnits="false" boundaryCondition="false" constant="false">
        <notes>
          <body xmlns="http://www.w3.org/1999/xhtml">
            <p>FORMULA: C45H68N2O43S2</p>
            <p>CHARGE: 0</p>
          </body>
        </notes>
      </species>
      <species id="M_cs_c_deg2_c" name="chondroitin sulfate C (GalNAc6S-GlcA), degradation product 2" compartment="c" hasOnlySubstanceUnits="false" boundaryCondition="false" constant="false">
        <notes>
          <body xmlns="http://www.w3.org/1999/xhtml">
            <p>FORMULA: C37H55NO38S2</p>
            <p>CHARGE: 0</p>
          </body>
        </notes>
      </species>
      <species id="M_cs_c_deg3_c" name="chondroitin sulfate C (GalNAc6S-GlcA), degradation product 3" compartment="c" hasOnlySubstanceUnits="false" boundaryCondition="false" constant="false">
        <notes>
          <body xmlns="http://www.w3.org/1999/xhtml">
            <p>FORMULA: C31H48NO32S2</p>
            <p>CHARGE: 0</p>
          </body>
        </notes>
      </species>
      <species id="M_cs_c_deg4_c" name="chondroitin sulfate C (GalNAc6S-GlcA), degradation product 4" compartment="c" hasOnlySubstanceUnits="false" boundaryCondition="false" constant="false">
        <notes>
          <body xmlns="http://www.w3.org/1999/xhtml">
            <p>FORMULA: C31H49NO29S</p>
            <p>CHARGE: 0</p>
          </body>
        </notes>
      </species>
      <species id="M_cs_c_deg5_c" name="chondroitin sulfate C (GalNAc6S-GlcA), degradation product 5" compartment="c" hasOnlySubstanceUnits="false" boundaryCondition="false" constant="false">
        <notes>
          <body xmlns="http://www.w3.org/1999/xhtml">
            <p>FORMULA: C23H36O24S</p>
            <p>CHARGE: 0</p>
          </body>
        </notes>
      </species>
      <species id="M_cs_c_pre2_c" name="chondroitin sulfate C (GalNAc6S-GlcA), precursor 2" compartment="c" hasOnlySubstanceUnits="false" boundaryCondition="false" constant="false">
        <notes>
          <body xmlns="http://www.w3.org/1999/xhtml">
            <p>FORMULA: C37H54NO37S2X</p>
            <p>CHARGE: 0</p>
          </body>
        </notes>
      </species>
      <species id="M_cs_c_pre3_c" name="chondroitin sulfate C (GalNAc6S-GlcA), precursor 3" compartment="c" hasOnlySubstanceUnits="false" boundaryCondition="false" constant="false">
        <notes>
          <body xmlns="http://www.w3.org/1999/xhtml">
            <p>FORMULA: C45H67N2O42S2X</p>
            <p>CHARGE: 0</p>
          </body>
        </notes>
      </species>
      <species id="M_cs_d_c" name="chondroitin sulfate D (GlcNAc6S-GlcA2S), free chain" compartment="c" hasOnlySubstanceUnits="false" boundaryCondition="false" constant="false">
        <notes>
          <body xmlns="http://www.w3.org/1999/xhtml">
            <p>FORMULA: C45H65N2O52S5</p>
            <p>CHARGE: 0</p>
          </body>
        </notes>
      </species>
      <species id="M_cs_d_deg1_c" name="chondroitin sulfate D (GlcNAc6S-GlcA2S), degradation product 1" compartment="c" hasOnlySubstanceUnits="false" boundaryCondition="false" constant="false">
        <notes>
          <body xmlns="http://www.w3.org/1999/xhtml">
            <p>FORMULA: C45H66N2O49S4</p>
            <p>CHARGE: 0</p>
          </body>
        </notes>
      </species>
      <species id="M_cs_d_deg2_c" name="chondroitin sulfate D (GlcNAc6S-GlcA2S), degradation product 2" compartment="c" hasOnlySubstanceUnits="false" boundaryCondition="false" constant="false">
        <notes>
          <body xmlns="http://www.w3.org/1999/xhtml">
            <p>FORMULA: C37H53NO44S4</p>
            <p>CHARGE: 0</p>
          </body>
        </notes>
      </species>
      <species id="M_cs_d_deg3_c" name="chondroitin sulfate D (GlcNAc6S-GlcA2S), degradation product 3" compartment="c" hasOnlySubstanceUnits="false" boundaryCondition="false" constant="false">
        <notes>
          <body xmlns="http://www.w3.org/1999/xhtml">
            <p>FORMULA: C37H54NO41S3</p>
            <p>CHARGE: 0</p>
          </body>
        </notes>
      </species>
      <species id="M_cs_d_deg4_c" name="chondroitin sulfate D (GlcNAc6S-GlcA2S), degradation product 4" compartment="c" hasOnlySubstanceUnits="false" boundaryCondition="false" constant="false">
        <notes>
          <body xmlns="http://www.w3.org/1999/xhtml">
            <p>FORMULA: C31H47NO35S3</p>
            <p>CHARGE: 0</p>
          </body>
        </notes>
      </species>
      <species id="M_cs_d_deg5_c" name="chondroitin sulfate D (GlcNAc6S-GlcA2S), degradation product 5" compartment="c" hasOnlySubstanceUnits="false" boundaryCondition="false" constant="false">
        <notes>
          <body xmlns="http://www.w3.org/1999/xhtml">
            <p>FORMULA: C31H48NO32S2</p>
            <p>CHARGE: 0</p>
          </body>
        </notes>
      </species>
      <species id="M_cs_d_deg6_c" name="chondroitin sulfate D (GlcNAc6S-GlcA2S), degradation product 6" compartment="c" hasOnlySubstanceUnits="false" boundaryCondition="false" constant="false">
        <notes>
          <body xmlns="http://www.w3.org/1999/xhtml">
            <p>FORMULA: C23H35O27S2</p>
            <p>CHARGE: 0</p>
          </body>
        </notes>
      </species>
      <species id="M_cs_d_pre2_c" name="chondroitin sulfate D (GlcNAc6S-GlcA2S) precursor 2" compartment="c" hasOnlySubstanceUnits="false" boundaryCondition="false" constant="false">
        <notes>
          <body xmlns="http://www.w3.org/1999/xhtml">
            <p>FORMULA: C31H46NO34S3X</p>
            <p>CHARGE: 0</p>
          </body>
        </notes>
      </species>
      <species id="M_cs_d_pre3_c" name="chondroitin sulfate D (GlcNAc6S-GlcA2S), precursor 3" compartment="c" hasOnlySubstanceUnits="false" boundaryCondition="false" constant="false">
        <notes>
          <body xmlns="http://www.w3.org/1999/xhtml">
            <p>FORMULA: C37H53NO40S3X</p>
            <p>CHARGE: 0</p>
          </body>
        </notes>
      </species>
      <species id="M_cs_d_pre4_c" name="chondroitin sulfate D (GlcNAc6S-GlcA2S), precursor 4" compartment="c" hasOnlySubstanceUnits="false" boundaryCondition="false" constant="false">
        <notes>
          <body xmlns="http://www.w3.org/1999/xhtml">
            <p>FORMULA: C45H66N2O45S3X</p>
            <p>CHARGE: 0</p>
          </body>
        </notes>
      </species>
      <species id="M_cs_d_pre5_c" name="chondroitin sulfate D (GlcNAc6S-GlcA2S), precursor 5" compartment="c" hasOnlySubstanceUnits="false" boundaryCondition="false" constant="false">
        <notes>
          <body xmlns="http://www.w3.org/1999/xhtml">
            <p>FORMULA: C45H65N2O48S4X</p>
            <p>CHARGE: 0</p>
          </body>
        </notes>
      </species>
      <species id="M_cs_e_c" name="chondroitin sulfate E (GalNAc4,6diS-GlcA), free chain" compartment="c" hasOnlySubstanceUnits="false" boundaryCondition="false" constant="false">
        <notes>
          <body xmlns="http://www.w3.org/1999/xhtml">
            <p>FORMULA: C45H64N2O55S6</p>
            <p>CHARGE: 0</p>
          </body>
        </notes>
      </species>
      <species id="M_cs_e_deg1_c" name="chondroitin sulfate E (GalNAc4,6diS-GlcA), degradation product 1" compartment="c" hasOnlySubstanceUnits="false" boundaryCondition="false" constant="false">
        <notes>
          <body xmlns="http://www.w3.org/1999/xhtml">
            <p>FORMULA: C45H65N2O52S5</p>
            <p>CHARGE: 0</p>
          </body>
        </notes>
      </species>
      <species id="M_cs_e_deg2_c" name="chondroitin sulfate E (GalNAc4,6diS-GlcA), degradation product 2" compartment="c" hasOnlySubstanceUnits="false" boundaryCondition="false" constant="false">
        <notes>
          <body xmlns="http://www.w3.org/1999/xhtml">
            <p>FORMULA: C45H66N2O49S4</p>
            <p>CHARGE: 0</p>
          </body>
        </notes>
      </species>
      <species id="M_cs_e_deg3_c" name="chondroitin sulfate E (GalNAc4,6diS-GlcA), degradation product 3" compartment="c" hasOnlySubstanceUnits="false" boundaryCondition="false" constant="false">
        <notes>
          <body xmlns="http://www.w3.org/1999/xhtml">
            <p>FORMULA: C37H53NO44S4</p>
            <p>CHARGE: 0</p>
          </body>
        </notes>
      </species>
      <species id="M_cs_e_deg4_c" name="chondroitin sulfate E (GalNAc4,6diS-GlcA), degradation product 4" compartment="c" hasOnlySubstanceUnits="false" boundaryCondition="false" constant="false">
        <notes>
          <body xmlns="http://www.w3.org/1999/xhtml">
            <p>FORMULA: C31H46NO38S4</p>
            <p>CHARGE: 0</p>
          </body>
        </notes>
      </species>
      <species id="M_cs_e_deg5_c" name="chondroitin sulfate E (GalNAc4,6diS-GlcA), degradation product 5" compartment="c" hasOnlySubstanceUnits="false" boundaryCondition="false" constant="false">
        <notes>
          <body xmlns="http://www.w3.org/1999/xhtml">
            <p>FORMULA: C31H47NO35S3</p>
            <p>CHARGE: 0</p>
          </body>
        </notes>
      </species>
      <species id="M_cs_e_deg6_c" name="chondroitin sulfate E (GalNAc4,6diS-GlcA), degradation product 6" compartment="c" hasOnlySubstanceUnits="false" boundaryCondition="false" constant="false">
        <notes>
          <body xmlns="http://www.w3.org/1999/xhtml">
            <p>FORMULA: C31H48NO32S2</p>
            <p>CHARGE: 0</p>
          </body>
        </notes>
      </species>
      <species id="M_cs_e_deg7_c" name="chondroitin sulfate E (GalNAc4,6diS-GlcA), degradation product 7" compartment="c" hasOnlySubstanceUnits="false" boundaryCondition="false" constant="false">
        <notes>
          <body xmlns="http://www.w3.org/1999/xhtml">
            <p>FORMULA: C23H35O27S2</p>
            <p>CHARGE: 0</p>
          </body>
        </notes>
      </species>
      <species id="M_cs_e_pre2_c" name="chondroitin sulfate E (GalNAc4,6diS-GlcA), precursor 2" compartment="c" hasOnlySubstanceUnits="false" boundaryCondition="false" constant="false">
        <notes>
          <body xmlns="http://www.w3.org/1999/xhtml">
            <p>FORMULA: C31H45NO37S4X</p>
            <p>CHARGE: 0</p>
          </body>
        </notes>
      </species>
      <species id="M_cs_e_pre3_c" name="chondroitin sulfate E (GalNAc4,6diS-GlcA), precursor 3" compartment="c" hasOnlySubstanceUnits="false" boundaryCondition="false" constant="false">
        <notes>
          <body xmlns="http://www.w3.org/1999/xhtml">
            <p>FORMULA: C37H52NO43S4X</p>
            <p>CHARGE: 0</p>
          </body>
        </notes>
      </species>
      <species id="M_cs_e_pre4_c" name="chondroitin sulfate E (GalNAc4,6diS-GlcA), precursor 4" compartment="c" hasOnlySubstanceUnits="false" boundaryCondition="false" constant="false">
        <notes>
          <body xmlns="http://www.w3.org/1999/xhtml">
            <p>FORMULA: C45H65N2O48S4X</p>
            <p>CHARGE: 0</p>
          </body>
        </notes>
      </species>
      <species id="M_cs_e_pre5a_c" name="chondroitin sulfate E (GalNAc4,6diS-GlcA), precursor 5a" compartment="c" hasOnlySubstanceUnits="false" boundaryCondition="false" constant="false">
        <notes>
          <body xmlns="http://www.w3.org/1999/xhtml">
            <p>FORMULA: C45H64N2O51S5X</p>
            <p>CHARGE: 0</p>
          </body>
        </notes>
      </species>
      <species id="M_cs_e_pre5b_c" name="chondroitin sulfate E (GalNAc4,6diS-GlcA), precursor 5b" compartment="c" hasOnlySubstanceUnits="false" boundaryCondition="false" constant="false">
        <notes>
          <body xmlns="http://www.w3.org/1999/xhtml">
            <p>FORMULA: C45H64N2O51S5X</p>
            <p>CHARGE: 0</p>
          </body>
        </notes>
      </species>
      <species id="M_cs_pre_c" name="chondroitin sulfate precursor (GalNAc-GlcA-(Gal)2-Xyl-L-Ser (protein))" compartment="c" hasOnlySubstanceUnits="false" boundaryCondition="false" constant="false">
        <notes>
          <body xmlns="http://www.w3.org/1999/xhtml">
            <p>FORMULA: C31H49NO25X</p>
            <p>CHARGE: 0</p>
          </body>
        </notes>
      </species>
      <species id="M_csn_c" name="Cytosine" compartment="c" hasOnlySubstanceUnits="false" boundaryCondition="false" constant="false">
        <notes>
          <body xmlns="http://www.w3.org/1999/xhtml">
            <p>FORMULA: C4H5N3O</p>
            <p>CHARGE: 0</p>
          </body>
        </notes>
      </species>
      <species id="M_csn_e" name="Cytosine" compartment="e" hasOnlySubstanceUnits="false" boundaryCondition="false" constant="false">
        <notes>
          <body xmlns="http://www.w3.org/1999/xhtml">
            <p>FORMULA: C4H5N3O</p>
            <p>CHARGE: 0</p>
          </body>
        </notes>
      </species>
      <species id="M_cspg_a_c" name="chondroitin sulfate A (GalNAc4S-GlcA) proteoglycan" compartment="c" hasOnlySubstanceUnits="false" boundaryCondition="false" constant="false">
        <notes>
          <body xmlns="http://www.w3.org/1999/xhtml">
            <p>FORMULA: C45H66N2O45S3X</p>
            <p>CHARGE: 0</p>
          </body>
        </notes>
      </species>
      <species id="M_cspg_a_e" name="chondroitin sulfate A (GalNAc4S-GlcA) proteoglycan" compartment="e" hasOnlySubstanceUnits="false" boundaryCondition="false" constant="false">
        <notes>
          <body xmlns="http://www.w3.org/1999/xhtml">
            <p>FORMULA: C45H66N2O45S3X</p>
            <p>CHARGE: 0</p>
          </body>
        </notes>
      </species>
      <species id="M_cspg_b_c" name="chondroitin sulfate B / dermatan sulfate (IdoA2S-GalNAc4S) proteoglycan" compartment="c" hasOnlySubstanceUnits="false" boundaryCondition="false" constant="false">
        <notes>
          <body xmlns="http://www.w3.org/1999/xhtml">
            <p>FORMULA: C45H65N2O48S4X</p>
            <p>CHARGE: 0</p>
          </body>
        </notes>
      </species>
      <species id="M_cspg_b_e" name="chondroitin sulfate B / dermatan sulfate (IdoA2S-GalNAc4S) proteoglycan" compartment="e" hasOnlySubstanceUnits="false" boundaryCondition="false" constant="false">
        <notes>
          <body xmlns="http://www.w3.org/1999/xhtml">
            <p>FORMULA: C45H65N2O48S4X</p>
            <p>CHARGE: 0</p>
          </body>
        </notes>
      </species>
      <species id="M_cspg_c_c" name="chondroitin sulfate C (GalNAc6S-GlcA) proteoglycan" compartment="c" hasOnlySubstanceUnits="false" boundaryCondition="false" constant="false">
        <notes>
          <body xmlns="http://www.w3.org/1999/xhtml">
            <p>FORMULA: C45H66N2O45S3X</p>
            <p>CHARGE: 0</p>
          </body>
        </notes>
      </species>
      <species id="M_cspg_c_e" name="chondroitin sulfate C (GalNAc6S-GlcA) proteoglycan" compartment="e" hasOnlySubstanceUnits="false" boundaryCondition="false" constant="false">
        <notes>
          <body xmlns="http://www.w3.org/1999/xhtml">
            <p>FORMULA: C45H66N2O45S3X</p>
            <p>CHARGE: 0</p>
          </body>
        </notes>
      </species>
      <species id="M_cspg_d_c" name="chondroitin sulfate D (GlcNAc6S-GlcA2S) proteoglycan" compartment="c" hasOnlySubstanceUnits="false" boundaryCondition="false" constant="false">
        <notes>
          <body xmlns="http://www.w3.org/1999/xhtml">
            <p>FORMULA: C45H64N2O51S5X</p>
            <p>CHARGE: 0</p>
          </body>
        </notes>
      </species>
      <species id="M_cspg_d_e" name="chondroitin sulfate D (GlcNAc6S-GlcA2S) proteoglycan" compartment="e" hasOnlySubstanceUnits="false" boundaryCondition="false" constant="false">
        <notes>
          <body xmlns="http://www.w3.org/1999/xhtml">
            <p>FORMULA: C45H64N2O51S5X</p>
            <p>CHARGE: 0</p>
          </body>
        </notes>
      </species>
      <species id="M_cspg_e_c" name="chondroitin sulfate E (GalNAc4,6diS-GlcA) proteoglycan" compartment="c" hasOnlySubstanceUnits="false" boundaryCondition="false" constant="false">
        <notes>
          <body xmlns="http://www.w3.org/1999/xhtml">
            <p>FORMULA: C45H63N2O54S6X</p>
            <p>CHARGE: 0</p>
          </body>
        </notes>
      </species>
      <species id="M_cspg_e_e" name="chondroitin sulfate E (GalNAc4,6diS-GlcA) proteoglycan" compartment="e" hasOnlySubstanceUnits="false" boundaryCondition="false" constant="false">
        <notes>
          <body xmlns="http://www.w3.org/1999/xhtml">
            <p>FORMULA: C45H63N2O54S6X</p>
            <p>CHARGE: 0</p>
          </body>
        </notes>
      </species>
      <species id="M_ctp_c" name="CTP" compartment="c" hasOnlySubstanceUnits="false" boundaryCondition="false" constant="false">
        <notes>
          <body xmlns="http://www.w3.org/1999/xhtml">
            <p>FORMULA: C9H12N3O14P3</p>
            <p>CHARGE: 0</p>
          </body>
        </notes>
      </species>
      <species id="M_cyan_c" name="Hydrogen cyanide" compartment="c" hasOnlySubstanceUnits="false" boundaryCondition="false" constant="false">
        <notes>
          <body xmlns="http://www.w3.org/1999/xhtml">
            <p>FORMULA: CHN</p>
            <p>CHARGE: 0</p>
          </body>
        </notes>
      </species>
      <species id="M_cyan_e" name="Hydrogen cyanide" compartment="e" hasOnlySubstanceUnits="false" boundaryCondition="false" constant="false">
        <notes>
          <body xmlns="http://www.w3.org/1999/xhtml">
            <p>FORMULA: CHN</p>
            <p>CHARGE: 0</p>
          </body>
        </notes>
      </species>
      <species id="M_cys_DASH_L_c" name="L-Cysteine" compartment="c" hasOnlySubstanceUnits="false" boundaryCondition="false" constant="false">
        <notes>
          <body xmlns="http://www.w3.org/1999/xhtml">
            <p>FORMULA: C3H7NO2S</p>
            <p>CHARGE: 0</p>
          </body>
        </notes>
      </species>
      <species id="M_cys_DASH_L_e" name="L-Cysteine" compartment="e" hasOnlySubstanceUnits="false" boundaryCondition="false" constant="false">
        <notes>
          <body xmlns="http://www.w3.org/1999/xhtml">
            <p>FORMULA: C3H7NO2S</p>
            <p>CHARGE: 0</p>
          </body>
        </notes>
      </species>
      <species id="M_cysam_c" name="Cysteamine" compartment="c" hasOnlySubstanceUnits="false" boundaryCondition="false" constant="false">
        <notes>
          <body xmlns="http://www.w3.org/1999/xhtml">
            <p>FORMULA: C2H8NS</p>
            <p>CHARGE: 0</p>
          </body>
        </notes>
      </species>
      <species id="M_cyst_DASH_L_c" name="L-Cystathionine" compartment="c" hasOnlySubstanceUnits="false" boundaryCondition="false" constant="false">
        <notes>
          <body xmlns="http://www.w3.org/1999/xhtml">
            <p>FORMULA: C7H14N2O4S</p>
            <p>CHARGE: 0</p>
          </body>
        </notes>
      </species>
      <species id="M_cytd_c" name="Cytidine" compartment="c" hasOnlySubstanceUnits="false" boundaryCondition="false" constant="false">
        <notes>
          <body xmlns="http://www.w3.org/1999/xhtml">
            <p>FORMULA: C9H13N3O5</p>
            <p>CHARGE: 0</p>
          </body>
        </notes>
      </species>
      <species id="M_cytd_e" name="Cytidine" compartment="e" hasOnlySubstanceUnits="false" boundaryCondition="false" constant="false">
        <notes>
          <body xmlns="http://www.w3.org/1999/xhtml">
            <p>FORMULA: C9H13N3O5</p>
            <p>CHARGE: 0</p>
          </body>
        </notes>
      </species>
      <species id="M_dad_DASH_2_c" name="Deoxyadenosine" compartment="c" hasOnlySubstanceUnits="false" boundaryCondition="false" constant="false">
        <notes>
          <body xmlns="http://www.w3.org/1999/xhtml">
            <p>FORMULA: C10H13N5O3</p>
            <p>CHARGE: 0</p>
          </body>
        </notes>
      </species>
      <species id="M_dad_DASH_2_e" name="Deoxyadenosine" compartment="e" hasOnlySubstanceUnits="false" boundaryCondition="false" constant="false">
        <notes>
          <body xmlns="http://www.w3.org/1999/xhtml">
            <p>FORMULA: C10H13N5O3</p>
            <p>CHARGE: 0</p>
          </body>
        </notes>
      </species>
      <species id="M_dad_DASH_5_e" name="5&apos;-Deoxyadenosine" compartment="e" hasOnlySubstanceUnits="false" boundaryCondition="false" constant="false">
        <notes>
          <body xmlns="http://www.w3.org/1999/xhtml">
            <p>FORMULA: C10H13N5O3</p>
            <p>CHARGE: 0</p>
          </body>
        </notes>
      </species>
      <species id="M_dadp_c" name="dADP" compartment="c" hasOnlySubstanceUnits="false" boundaryCondition="false" constant="false">
        <notes>
          <body xmlns="http://www.w3.org/1999/xhtml">
            <p>FORMULA: C10H12N5O9P2</p>
            <p>CHARGE: 0</p>
          </body>
        </notes>
      </species>
      <species id="M_dag_hs_c" name="diacylglycerol (homo sapiens)" compartment="c" hasOnlySubstanceUnits="false" boundaryCondition="false" constant="false">
        <notes>
          <body xmlns="http://www.w3.org/1999/xhtml">
            <p>FORMULA: C3H6OFULLRCO2FULLR2CO2</p>
            <p>CHARGE: 0</p>
          </body>
        </notes>
      </species>
      <species id="M_dag_hs_e" name="diacylglycerol (homo sapiens)" compartment="e" hasOnlySubstanceUnits="false" boundaryCondition="false" constant="false">
        <notes>
          <body xmlns="http://www.w3.org/1999/xhtml">
            <p>FORMULA: C3H6OFULLRCO2FULLR2CO2</p>
            <p>CHARGE: 0</p>
          </body>
        </notes>
      </species>
      <species id="M_dak2gpe_hs_c" name="1-alkenyl 2-acylglycerol 3-phosphoethanolamine plasmalogen (homo sapiens)" compartment="c" hasOnlySubstanceUnits="false" boundaryCondition="false" constant="false">
        <notes>
          <body xmlns="http://www.w3.org/1999/xhtml">
            <p>FORMULA: C7H14O5NPFULLRFULLR2CO</p>
            <p>CHARGE: 0</p>
          </body>
        </notes>
      </species>
      <species id="M_damp_c" name="dAMP" compartment="c" hasOnlySubstanceUnits="false" boundaryCondition="false" constant="false">
        <notes>
          <body xmlns="http://www.w3.org/1999/xhtml">
            <p>FORMULA: C10H12N5O6P</p>
            <p>CHARGE: 0</p>
          </body>
        </notes>
      </species>
      <species id="M_datp_c" name="dATP" compartment="c" hasOnlySubstanceUnits="false" boundaryCondition="false" constant="false">
        <notes>
          <body xmlns="http://www.w3.org/1999/xhtml">
            <p>FORMULA: C10H12N5O12P3</p>
            <p>CHARGE: 0</p>
          </body>
        </notes>
      </species>
      <species id="M_dcacoa_c" name="Decanoyl-CoA (n-C10:0CoA)" compartment="c" hasOnlySubstanceUnits="false" boundaryCondition="false" constant="false">
        <notes>
          <body xmlns="http://www.w3.org/1999/xhtml">
            <p>FORMULA: C31H50N7O17P3S</p>
            <p>CHARGE: 0</p>
          </body>
        </notes>
      </species>
      <species id="M_dcamp_c" name="N6-(1,2-Dicarboxyethyl)-AMP" compartment="c" hasOnlySubstanceUnits="false" boundaryCondition="false" constant="false">
        <notes>
          <body xmlns="http://www.w3.org/1999/xhtml">
            <p>FORMULA: C14H14N5O11P</p>
            <p>CHARGE: 0</p>
          </body>
        </notes>
      </species>
      <species id="M_dcdp_c" name="dCDP" compartment="c" hasOnlySubstanceUnits="false" boundaryCondition="false" constant="false">
        <notes>
          <body xmlns="http://www.w3.org/1999/xhtml">
            <p>FORMULA: C9H12N3O10P2</p>
            <p>CHARGE: 0</p>
          </body>
        </notes>
      </species>
      <species id="M_dcholcoa_c" name="chenodeoxycholoyl coenzyme a" compartment="c" hasOnlySubstanceUnits="false" boundaryCondition="false" constant="false">
        <notes>
          <body xmlns="http://www.w3.org/1999/xhtml">
            <p>FORMULA: C45H70N7O19P3S</p>
            <p>CHARGE: 0</p>
          </body>
        </notes>
      </species>
      <species id="M_dcmp_c" name="dCMP" compartment="c" hasOnlySubstanceUnits="false" boundaryCondition="false" constant="false">
        <notes>
          <body xmlns="http://www.w3.org/1999/xhtml">
            <p>FORMULA: C9H12N3O7P</p>
            <p>CHARGE: 0</p>
          </body>
        </notes>
      </species>
      <species id="M_dcsptn1_c" name="docosa-4,7,10,13,16-pentaenoic acid (n-6)" compartment="c" hasOnlySubstanceUnits="false" boundaryCondition="false" constant="false">
        <notes>
          <body xmlns="http://www.w3.org/1999/xhtml">
            <p>FORMULA: C22H33O2</p>
            <p>CHARGE: 0</p>
          </body>
        </notes>
      </species>
      <species id="M_dcsptn1_e" name="docosa-4,7,10,13,16-pentaenoic acid (n-6)" compartment="e" hasOnlySubstanceUnits="false" boundaryCondition="false" constant="false">
        <notes>
          <body xmlns="http://www.w3.org/1999/xhtml">
            <p>FORMULA: C22H33O2</p>
            <p>CHARGE: 0</p>
          </body>
        </notes>
      </species>
      <species id="M_dcsptn1coa_c" name="docosa-4,7,10,13,16-pentaenoyl coenzyme A" compartment="c" hasOnlySubstanceUnits="false" boundaryCondition="false" constant="false">
        <notes>
          <body xmlns="http://www.w3.org/1999/xhtml">
            <p>FORMULA: C43H64N7O17P3S</p>
            <p>CHARGE: 0</p>
          </body>
        </notes>
      </species>
      <species id="M_dcsptn1crn_c" name="docosa-4,7,10,13,16-pentaenoyl carnitine" compartment="c" hasOnlySubstanceUnits="false" boundaryCondition="false" constant="false">
        <notes>
          <body xmlns="http://www.w3.org/1999/xhtml">
            <p>FORMULA: C29H47NO4</p>
            <p>CHARGE: 0</p>
          </body>
        </notes>
      </species>
      <species id="M_dctp_c" name="dCTP" compartment="c" hasOnlySubstanceUnits="false" boundaryCondition="false" constant="false">
        <notes>
          <body xmlns="http://www.w3.org/1999/xhtml">
            <p>FORMULA: C9H12N3O13P3</p>
            <p>CHARGE: 0</p>
          </body>
        </notes>
      </species>
      <species id="M_dcyt_c" name="Deoxycytidine" compartment="c" hasOnlySubstanceUnits="false" boundaryCondition="false" constant="false">
        <notes>
          <body xmlns="http://www.w3.org/1999/xhtml">
            <p>FORMULA: C9H13N3O4</p>
            <p>CHARGE: 0</p>
          </body>
        </notes>
      </species>
      <species id="M_dcyt_e" name="Deoxycytidine" compartment="e" hasOnlySubstanceUnits="false" boundaryCondition="false" constant="false">
        <notes>
          <body xmlns="http://www.w3.org/1999/xhtml">
            <p>FORMULA: C9H13N3O4</p>
            <p>CHARGE: 0</p>
          </body>
        </notes>
      </species>
      <species id="M_dd2coa_c" name="trans-Dodec-2-enoyl-CoA" compartment="c" hasOnlySubstanceUnits="false" boundaryCondition="false" constant="false">
        <notes>
          <body xmlns="http://www.w3.org/1999/xhtml">
            <p>FORMULA: C33H52N7O17P3S</p>
            <p>CHARGE: 0</p>
          </body>
        </notes>
      </species>
      <species id="M_dd3coa_c" name="3-dodecenoyl CoA" compartment="c" hasOnlySubstanceUnits="false" boundaryCondition="false" constant="false">
        <notes>
          <body xmlns="http://www.w3.org/1999/xhtml">
            <p>FORMULA: C33H52N7O17P3S</p>
            <p>CHARGE: 0</p>
          </body>
        </notes>
      </species>
      <species id="M_ddcaACP_c" name="Dodecanoyl-ACP (n-C12:0ACP)" compartment="c" hasOnlySubstanceUnits="false" boundaryCondition="false" constant="false">
        <notes>
          <body xmlns="http://www.w3.org/1999/xhtml">
            <p>FORMULA: C23H43N2O8PRS</p>
            <p>CHARGE: 0</p>
          </body>
        </notes>
      </species>
      <species id="M_ddca_c" name="Dodecanoate (n-C12:0)" compartment="c" hasOnlySubstanceUnits="false" boundaryCondition="false" constant="false">
        <notes>
          <body xmlns="http://www.w3.org/1999/xhtml">
            <p>FORMULA: C12H23O2</p>
            <p>CHARGE: 0</p>
          </body>
        </notes>
      </species>
      <species id="M_ddcacoa_c" name="Dodecanoyl-CoA (n-C12:0CoA)" compartment="c" hasOnlySubstanceUnits="false" boundaryCondition="false" constant="false">
        <notes>
          <body xmlns="http://www.w3.org/1999/xhtml">
            <p>FORMULA: C33H54N7O17P3S</p>
            <p>CHARGE: 0</p>
          </body>
        </notes>
      </species>
      <species id="M_ddsmsterol_c" name="7-Dehydrodesmosterol" compartment="c" hasOnlySubstanceUnits="false" boundaryCondition="false" constant="false">
        <notes>
          <body xmlns="http://www.w3.org/1999/xhtml">
            <p>FORMULA: C27H42O</p>
            <p>CHARGE: 0</p>
          </body>
        </notes>
      </species>
      <species id="M_debrisoquine_c" name="debrisoquine" compartment="c" hasOnlySubstanceUnits="false" boundaryCondition="false" constant="false">
        <notes>
          <body xmlns="http://www.w3.org/1999/xhtml">
            <p>FORMULA: C10H14N3</p>
            <p>CHARGE: 0</p>
          </body>
        </notes>
      </species>
      <species id="M_debrisoquine_e" name="debrisoquine" compartment="e" hasOnlySubstanceUnits="false" boundaryCondition="false" constant="false">
        <notes>
          <body xmlns="http://www.w3.org/1999/xhtml">
            <p>FORMULA: C10H14N3</p>
            <p>CHARGE: 0</p>
          </body>
        </notes>
      </species>
      <species id="M_decdp_c" name="all trans Decaprenyl diphosphate" compartment="c" hasOnlySubstanceUnits="false" boundaryCondition="false" constant="false">
        <notes>
          <body xmlns="http://www.w3.org/1999/xhtml">
            <p>FORMULA: C50H81O7P2</p>
            <p>CHARGE: 0</p>
          </body>
        </notes>
      </species>
      <species id="M_dedol_L_c" name="Dehydrodolichol, human liver homolog" compartment="c" hasOnlySubstanceUnits="false" boundaryCondition="false" constant="false">
        <notes>
          <body xmlns="http://www.w3.org/1999/xhtml">
            <p>FORMULA: C1080H1748O10</p>
            <p>CHARGE: 0</p>
          </body>
        </notes>
      </species>
      <species id="M_dedol_U_c" name="Dehydrodolichol, human uterine homolog" compartment="c" hasOnlySubstanceUnits="false" boundaryCondition="false" constant="false">
        <notes>
          <body xmlns="http://www.w3.org/1999/xhtml">
            <p>FORMULA: C1025H1660O10</p>
            <p>CHARGE: 0</p>
          </body>
        </notes>
      </species>
      <species id="M_dedoldp_L_c" name="Dehydrodolichol diphosphate, human liver homolog" compartment="c" hasOnlySubstanceUnits="false" boundaryCondition="false" constant="false">
        <notes>
          <body xmlns="http://www.w3.org/1999/xhtml">
            <p>FORMULA: C1080H1738O70P20</p>
            <p>CHARGE: 0</p>
          </body>
        </notes>
      </species>
      <species id="M_dedoldp_U_c" name="Dehydrodolichol diphosphate, human uterine homolog" compartment="c" hasOnlySubstanceUnits="false" boundaryCondition="false" constant="false">
        <notes>
          <body xmlns="http://www.w3.org/1999/xhtml">
            <p>FORMULA: C1025H1650O70P20</p>
            <p>CHARGE: 0</p>
          </body>
        </notes>
      </species>
      <species id="M_dedolp_L_c" name="Dehydrodolichol phosphate, human liver homolog" compartment="c" hasOnlySubstanceUnits="false" boundaryCondition="false" constant="false">
        <notes>
          <body xmlns="http://www.w3.org/1999/xhtml">
            <p>FORMULA: C1080H1738O40P10</p>
            <p>CHARGE: 0</p>
          </body>
        </notes>
      </species>
      <species id="M_dedolp_U_c" name="Dehydrodolichol phosphate, human uterine homolog" compartment="c" hasOnlySubstanceUnits="false" boundaryCondition="false" constant="false">
        <notes>
          <body xmlns="http://www.w3.org/1999/xhtml">
            <p>FORMULA: C1025H1650O40P10</p>
            <p>CHARGE: 0</p>
          </body>
        </notes>
      </species>
      <species id="M_dem2emgacpail_prot_hs_c" name="deacylated-(phosphoethanolaminyl-dimannosyl),(phosphoethanolaminyl)-mannosyl-glucosaminyl-acylphosphatidylinositol" compartment="c" hasOnlySubstanceUnits="false" boundaryCondition="false" constant="false">
        <notes>
          <body xmlns="http://www.w3.org/1999/xhtml">
            <p>FORMULA: C37H70N3O34P3FULLRCO2FULLR2CO2X</p>
            <p>CHARGE: 0</p>
          </body>
        </notes>
      </species>
      <species id="M_dgchol_c" name="Chenodeoxyglycocholate" compartment="c" hasOnlySubstanceUnits="false" boundaryCondition="false" constant="false">
        <notes>
          <body xmlns="http://www.w3.org/1999/xhtml">
            <p>FORMULA: C26H43NO5</p>
            <p>CHARGE: 0</p>
          </body>
        </notes>
      </species>
      <species id="M_dgchol_e" name="Chenodeoxyglycocholate" compartment="e" hasOnlySubstanceUnits="false" boundaryCondition="false" constant="false">
        <notes>
          <body xmlns="http://www.w3.org/1999/xhtml">
            <p>FORMULA: C26H43NO5</p>
            <p>CHARGE: 0</p>
          </body>
        </notes>
      </species>
      <species id="M_dgcholcoa_c" name="Chenodeoxyglycocholoyl-CoA" compartment="c" hasOnlySubstanceUnits="false" boundaryCondition="false" constant="false">
        <notes>
          <body xmlns="http://www.w3.org/1999/xhtml">
            <p>FORMULA: C45H70N7O19P3S</p>
            <p>CHARGE: 0</p>
          </body>
        </notes>
      </species>
      <species id="M_dgdp_c" name="dGDP" compartment="c" hasOnlySubstanceUnits="false" boundaryCondition="false" constant="false">
        <notes>
          <body xmlns="http://www.w3.org/1999/xhtml">
            <p>FORMULA: C10H12N5O10P2</p>
            <p>CHARGE: 0</p>
          </body>
        </notes>
      </species>
      <species id="M_dgmp_c" name="dGMP" compartment="c" hasOnlySubstanceUnits="false" boundaryCondition="false" constant="false">
        <notes>
          <body xmlns="http://www.w3.org/1999/xhtml">
            <p>FORMULA: C10H12N5O7P</p>
            <p>CHARGE: 0</p>
          </body>
        </notes>
      </species>
      <species id="M_dgpi_prot_hs_c" name="deacylated-glycophosphatidylinositol (GPI)-anchored protein" compartment="c" hasOnlySubstanceUnits="false" boundaryCondition="false" constant="false">
        <notes>
          <body xmlns="http://www.w3.org/1999/xhtml">
            <p>FORMULA: C39H76N4O37P4FULLRCO2FULLR2CO2X</p>
            <p>CHARGE: 0</p>
          </body>
        </notes>
      </species>
      <species id="M_dgsn_c" name="Deoxyguanosine" compartment="c" hasOnlySubstanceUnits="false" boundaryCondition="false" constant="false">
        <notes>
          <body xmlns="http://www.w3.org/1999/xhtml">
            <p>FORMULA: C10H13N5O4</p>
            <p>CHARGE: 0</p>
          </body>
        </notes>
      </species>
      <species id="M_dgsn_e" name="Deoxyguanosine" compartment="e" hasOnlySubstanceUnits="false" boundaryCondition="false" constant="false">
        <notes>
          <body xmlns="http://www.w3.org/1999/xhtml">
            <p>FORMULA: C10H13N5O4</p>
            <p>CHARGE: 0</p>
          </body>
        </notes>
      </species>
      <species id="M_dgtp_c" name="dGTP" compartment="c" hasOnlySubstanceUnits="false" boundaryCondition="false" constant="false">
        <notes>
          <body xmlns="http://www.w3.org/1999/xhtml">
            <p>FORMULA: C10H12N5O13P3</p>
            <p>CHARGE: 0</p>
          </body>
        </notes>
      </species>
      <species id="M_dha_c" name="Dihydroxyacetone" compartment="c" hasOnlySubstanceUnits="false" boundaryCondition="false" constant="false">
        <notes>
          <body xmlns="http://www.w3.org/1999/xhtml">
            <p>FORMULA: C3H6O3</p>
            <p>CHARGE: 0</p>
          </body>
        </notes>
      </species>
      <species id="M_dhap_c" name="Dihydroxyacetone phosphate" compartment="c" hasOnlySubstanceUnits="false" boundaryCondition="false" constant="false">
        <notes>
          <body xmlns="http://www.w3.org/1999/xhtml">
            <p>FORMULA: C3H5O6P</p>
            <p>CHARGE: 0</p>
          </body>
        </notes>
      </species>
      <species id="M_dhbpt_c" name="6,7-Dihydrobiopterin" compartment="c" hasOnlySubstanceUnits="false" boundaryCondition="false" constant="false">
        <notes>
          <body xmlns="http://www.w3.org/1999/xhtml">
            <p>FORMULA: C9H13N5O3</p>
            <p>CHARGE: 0</p>
          </body>
        </notes>
      </species>
      <species id="M_dhcholestanate_c" name="3alpha,7alpha-Dihydroxy-5beta-cholestanate" compartment="c" hasOnlySubstanceUnits="false" boundaryCondition="false" constant="false">
        <notes>
          <body xmlns="http://www.w3.org/1999/xhtml">
            <p>FORMULA: C27H45O4</p>
            <p>CHARGE: 0</p>
          </body>
        </notes>
      </species>
      <species id="M_dhcholestancoa_c" name="3alpha,7alpha-Dihydroxy-5beta-cholestanoyl-CoA" compartment="c" hasOnlySubstanceUnits="false" boundaryCondition="false" constant="false">
        <notes>
          <body xmlns="http://www.w3.org/1999/xhtml">
            <p>FORMULA: C48H76N7O19P3S</p>
            <p>CHARGE: 0</p>
          </body>
        </notes>
      </species>
      <species id="M_dhcholoylcoa_c" name="3alpha,7alpha-Dihydroxy-5beta-cholest-24-enoyl-CoA" compartment="c" hasOnlySubstanceUnits="false" boundaryCondition="false" constant="false">
        <notes>
          <body xmlns="http://www.w3.org/1999/xhtml">
            <p>FORMULA: C48H74N7O19P3S</p>
            <p>CHARGE: 0</p>
          </body>
        </notes>
      </species>
      <species id="M_dhcrm_hs_c" name="dihydroceramide (homo sapiens)" compartment="c" hasOnlySubstanceUnits="false" boundaryCondition="false" constant="false">
        <notes>
          <body xmlns="http://www.w3.org/1999/xhtml">
            <p>FORMULA: C18H38NO2FULLRCO</p>
            <p>CHARGE: 0</p>
          </body>
        </notes>
      </species>
      <species id="M_dhdascb_c" name="Dehydroascorbate" compartment="c" hasOnlySubstanceUnits="false" boundaryCondition="false" constant="false">
        <notes>
          <body xmlns="http://www.w3.org/1999/xhtml">
            <p>FORMULA: C6H6O6</p>
            <p>CHARGE: 0</p>
          </body>
        </notes>
      </species>
      <species id="M_dhdascb_e" name="Dehydroascorbate" compartment="e" hasOnlySubstanceUnits="false" boundaryCondition="false" constant="false">
        <notes>
          <body xmlns="http://www.w3.org/1999/xhtml">
            <p>FORMULA: C6H6O6</p>
            <p>CHARGE: 0</p>
          </body>
        </notes>
      </species>
      <species id="M_dhea_c" name="Dehydroepiandrosterone" compartment="c" hasOnlySubstanceUnits="false" boundaryCondition="false" constant="false">
        <notes>
          <body xmlns="http://www.w3.org/1999/xhtml">
            <p>FORMULA: C19H28O2</p>
            <p>CHARGE: 0</p>
          </body>
        </notes>
      </species>
      <species id="M_dheas_c" name="Dehydroepiandrosterone sulfate" compartment="c" hasOnlySubstanceUnits="false" boundaryCondition="false" constant="false">
        <notes>
          <body xmlns="http://www.w3.org/1999/xhtml">
            <p>FORMULA: C19H27O5S</p>
            <p>CHARGE: 0</p>
          </body>
        </notes>
      </species>
      <species id="M_dheas_e" name="Dehydroepiandrosterone sulfate" compartment="e" hasOnlySubstanceUnits="false" boundaryCondition="false" constant="false">
        <notes>
          <body xmlns="http://www.w3.org/1999/xhtml">
            <p>FORMULA: C19H27O5S</p>
            <p>CHARGE: 0</p>
          </body>
        </notes>
      </species>
      <species id="M_dhf_c" name="7,8-Dihydrofolate" compartment="c" hasOnlySubstanceUnits="false" boundaryCondition="false" constant="false">
        <notes>
          <body xmlns="http://www.w3.org/1999/xhtml">
            <p>FORMULA: C19H19N7O6</p>
            <p>CHARGE: 0</p>
          </body>
        </notes>
      </species>
      <species id="M_dhf_e" name="7,8-Dihydrofolate" compartment="e" hasOnlySubstanceUnits="false" boundaryCondition="false" constant="false">
        <notes>
          <body xmlns="http://www.w3.org/1999/xhtml">
            <p>FORMULA: C19H19N7O6</p>
            <p>CHARGE: 0</p>
          </body>
        </notes>
      </species>
      <species id="M_dhlam_c" name="Dihydrolipoamide" compartment="c" hasOnlySubstanceUnits="false" boundaryCondition="false" constant="false">
        <notes>
          <body xmlns="http://www.w3.org/1999/xhtml">
            <p>FORMULA: C8H17NOS2</p>
            <p>CHARGE: 0</p>
          </body>
        </notes>
      </species>
      <species id="M_dhlpro_c" name="Dihydrolipolprotein" compartment="c" hasOnlySubstanceUnits="false" boundaryCondition="false" constant="false">
        <notes>
          <body xmlns="http://www.w3.org/1999/xhtml">
            <p>FORMULA: H2S2X</p>
            <p>CHARGE: 0</p>
          </body>
        </notes>
      </species>
      <species id="M_dhocholoylcoa_c" name="3alpha,7alpha,12alpha,26-Tetrahydroxy-5beta-cholestane" compartment="c" hasOnlySubstanceUnits="false" boundaryCondition="false" constant="false">
        <notes>
          <body xmlns="http://www.w3.org/1999/xhtml">
            <p>FORMULA: C48H74N7O20P3S</p>
            <p>CHARGE: 0</p>
          </body>
        </notes>
      </species>
      <species id="M_dhor_DASH_S_c" name="(S)-Dihydroorotate" compartment="c" hasOnlySubstanceUnits="false" boundaryCondition="false" constant="false">
        <notes>
          <body xmlns="http://www.w3.org/1999/xhtml">
            <p>FORMULA: C5H5N2O4</p>
            <p>CHARGE: 0</p>
          </body>
        </notes>
      </species>
      <species id="M_didp_c" name="dIDP" compartment="c" hasOnlySubstanceUnits="false" boundaryCondition="false" constant="false">
        <notes>
          <body xmlns="http://www.w3.org/1999/xhtml">
            <p>FORMULA: C10H11N4O10P2</p>
            <p>CHARGE: 0</p>
          </body>
        </notes>
      </species>
      <species id="M_digalsgalside_hs_c" name="Digalactosylceramidesulfate" compartment="c" hasOnlySubstanceUnits="false" boundaryCondition="false" constant="false">
        <notes>
          <body xmlns="http://www.w3.org/1999/xhtml">
            <p>FORMULA: C30H55NO15SFULLRCO</p>
            <p>CHARGE: 0</p>
          </body>
        </notes>
      </species>
      <species id="M_digalsgalside_hs_e" name="Digalactosylceramidesulfate" compartment="e" hasOnlySubstanceUnits="false" boundaryCondition="false" constant="false">
        <notes>
          <body xmlns="http://www.w3.org/1999/xhtml">
            <p>FORMULA: C30H55NO15SFULLRCO</p>
            <p>CHARGE: 0</p>
          </body>
        </notes>
      </species>
      <species id="M_digalside_hs_c" name="Digalactosylceramide" compartment="c" hasOnlySubstanceUnits="false" boundaryCondition="false" constant="false">
        <notes>
          <body xmlns="http://www.w3.org/1999/xhtml">
            <p>FORMULA: C30H56NO12FULLRCO</p>
            <p>CHARGE: 0</p>
          </body>
        </notes>
      </species>
      <species id="M_dimp_c" name="dIMP" compartment="c" hasOnlySubstanceUnits="false" boundaryCondition="false" constant="false">
        <notes>
          <body xmlns="http://www.w3.org/1999/xhtml">
            <p>FORMULA: C10H11N4O7P</p>
            <p>CHARGE: 0</p>
          </body>
        </notes>
      </species>
      <species id="M_din_c" name="Deoxyinosine" compartment="c" hasOnlySubstanceUnits="false" boundaryCondition="false" constant="false">
        <notes>
          <body xmlns="http://www.w3.org/1999/xhtml">
            <p>FORMULA: C10H12N4O4</p>
            <p>CHARGE: 0</p>
          </body>
        </notes>
      </species>
      <species id="M_din_e" name="Deoxyinosine" compartment="e" hasOnlySubstanceUnits="false" boundaryCondition="false" constant="false">
        <notes>
          <body xmlns="http://www.w3.org/1999/xhtml">
            <p>FORMULA: C10H12N4O4</p>
            <p>CHARGE: 0</p>
          </body>
        </notes>
      </species>
      <species id="M_ditp_c" name="dITP" compartment="c" hasOnlySubstanceUnits="false" boundaryCondition="false" constant="false">
        <notes>
          <body xmlns="http://www.w3.org/1999/xhtml">
            <p>FORMULA: C10H11N4O13P3</p>
            <p>CHARGE: 0</p>
          </body>
        </notes>
      </species>
      <species id="M_dkmpp_c" name="2,3-diketo-5-methylthio-1-phosphopentane" compartment="c" hasOnlySubstanceUnits="false" boundaryCondition="false" constant="false">
        <notes>
          <body xmlns="http://www.w3.org/1999/xhtml">
            <p>FORMULA: C6H9O6PS</p>
            <p>CHARGE: 0</p>
          </body>
        </notes>
      </species>
      <species id="M_dlnlcg_c" name="dihomo-gamma-linolenic acid (n-6)" compartment="c" hasOnlySubstanceUnits="false" boundaryCondition="false" constant="false">
        <notes>
          <body xmlns="http://www.w3.org/1999/xhtml">
            <p>FORMULA: C20H33O2</p>
            <p>CHARGE: 0</p>
          </body>
        </notes>
      </species>
      <species id="M_dlnlcg_e" name="dihomo-gamma-linolenic acid (n-6)" compartment="e" hasOnlySubstanceUnits="false" boundaryCondition="false" constant="false">
        <notes>
          <body xmlns="http://www.w3.org/1999/xhtml">
            <p>FORMULA: C20H33O2</p>
            <p>CHARGE: 0</p>
          </body>
        </notes>
      </species>
      <species id="M_dlnlcgcoa_c" name="dihomo-gamma-linolenyl coenzyme A" compartment="c" hasOnlySubstanceUnits="false" boundaryCondition="false" constant="false">
        <notes>
          <body xmlns="http://www.w3.org/1999/xhtml">
            <p>FORMULA: C41H64N7O17P3S</p>
            <p>CHARGE: 0</p>
          </body>
        </notes>
      </species>
      <species id="M_dlnlcgcrn_c" name="dihomo-gamma-linolenyl carnitine" compartment="c" hasOnlySubstanceUnits="false" boundaryCondition="false" constant="false">
        <notes>
          <body xmlns="http://www.w3.org/1999/xhtml">
            <p>FORMULA: C27H47NO4</p>
            <p>CHARGE: 0</p>
          </body>
        </notes>
      </species>
      <species id="M_dmantipyrine_c" name="demethylated antipyrine" compartment="c" hasOnlySubstanceUnits="false" boundaryCondition="false" constant="false">
        <notes>
          <body xmlns="http://www.w3.org/1999/xhtml">
            <p>FORMULA: C10H10N2O</p>
            <p>CHARGE: 0</p>
          </body>
        </notes>
      </species>
      <species id="M_dmantipyrine_e" name="demethylated antipyrine" compartment="e" hasOnlySubstanceUnits="false" boundaryCondition="false" constant="false">
        <notes>
          <body xmlns="http://www.w3.org/1999/xhtml">
            <p>FORMULA: C10H10N2O</p>
            <p>CHARGE: 0</p>
          </body>
        </notes>
      </species>
      <species id="M_dmgly_c" name="N,N-Dimethylglycine" compartment="c" hasOnlySubstanceUnits="false" boundaryCondition="false" constant="false">
        <notes>
          <body xmlns="http://www.w3.org/1999/xhtml">
            <p>FORMULA: C4H9NO2</p>
            <p>CHARGE: 0</p>
          </body>
        </notes>
      </species>
      <species id="M_dmhptcoa_c" name="2,6 dimethylheptanoyl-CoA" compartment="c" hasOnlySubstanceUnits="false" boundaryCondition="false" constant="false">
        <notes>
          <body xmlns="http://www.w3.org/1999/xhtml">
            <p>FORMULA: C30H52N7O17P3S</p>
            <p>CHARGE: 0</p>
          </body>
        </notes>
      </species>
      <species id="M_dmhptcrn_c" name="2,6 dimethylheptanoyl carnitine" compartment="c" hasOnlySubstanceUnits="false" boundaryCondition="false" constant="false">
        <notes>
          <body xmlns="http://www.w3.org/1999/xhtml">
            <p>FORMULA: C16H35NO4</p>
            <p>CHARGE: 0</p>
          </body>
        </notes>
      </species>
      <species id="M_dmhptcrn_e" name="2,6 dimethylheptanoyl carnitine" compartment="e" hasOnlySubstanceUnits="false" boundaryCondition="false" constant="false">
        <notes>
          <body xmlns="http://www.w3.org/1999/xhtml">
            <p>FORMULA: C16H35NO4</p>
            <p>CHARGE: 0</p>
          </body>
        </notes>
      </species>
      <species id="M_dmnoncoa_c" name="4,8 dimethylnonanoyl-CoA" compartment="c" hasOnlySubstanceUnits="false" boundaryCondition="false" constant="false">
        <notes>
          <body xmlns="http://www.w3.org/1999/xhtml">
            <p>FORMULA: C32H54N7O17P3S</p>
            <p>CHARGE: 0</p>
          </body>
        </notes>
      </species>
      <species id="M_dmnoncrn_c" name="4,8 dimethylnonanoyl carnitine" compartment="c" hasOnlySubstanceUnits="false" boundaryCondition="false" constant="false">
        <notes>
          <body xmlns="http://www.w3.org/1999/xhtml">
            <p>FORMULA: C18H37NO4</p>
            <p>CHARGE: 0</p>
          </body>
        </notes>
      </species>
      <species id="M_dmpp_c" name="Dimethylallyl diphosphate" compartment="c" hasOnlySubstanceUnits="false" boundaryCondition="false" constant="false">
        <notes>
          <body xmlns="http://www.w3.org/1999/xhtml">
            <p>FORMULA: C5H9O7P2</p>
            <p>CHARGE: 0</p>
          </body>
        </notes>
      </species>
      <species id="M_dna5mtc_c" name="DNA 5-methylcytosine" compartment="c" hasOnlySubstanceUnits="false" boundaryCondition="false" constant="false">
        <notes>
          <body xmlns="http://www.w3.org/1999/xhtml">
            <p>FORMULA: C11H19O8PR2</p>
            <p>CHARGE: 0</p>
          </body>
        </notes>
      </species>
      <species id="M_dna_c" name="DNA" compartment="c" hasOnlySubstanceUnits="false" boundaryCondition="false" constant="false">
        <notes>
          <body xmlns="http://www.w3.org/1999/xhtml">
            <p>FORMULA: C10H17O8PR2</p>
            <p>CHARGE: 0</p>
          </body>
        </notes>
      </species>
      <species id="M_dnad_c" name="Deamino-NAD+" compartment="c" hasOnlySubstanceUnits="false" boundaryCondition="false" constant="false">
        <notes>
          <body xmlns="http://www.w3.org/1999/xhtml">
            <p>FORMULA: C21H24N6O15P2</p>
            <p>CHARGE: 0</p>
          </body>
        </notes>
      </species>
      <species id="M_doldp_L_c" name="Dolichol diphosphate, human liver homolog" compartment="c" hasOnlySubstanceUnits="false" boundaryCondition="false" constant="false">
        <notes>
          <body xmlns="http://www.w3.org/1999/xhtml">
            <p>FORMULA: C1080H1758O70P20</p>
            <p>CHARGE: 0</p>
          </body>
        </notes>
      </species>
      <species id="M_doldp_U_c" name="Dolichol diphosphate, human uterine homolog" compartment="c" hasOnlySubstanceUnits="false" boundaryCondition="false" constant="false">
        <notes>
          <body xmlns="http://www.w3.org/1999/xhtml">
            <p>FORMULA: C1025H1670O70P20</p>
            <p>CHARGE: 0</p>
          </body>
        </notes>
      </species>
      <species id="M_dolglcp_L_c" name="Dolichyl beta-D-glucosyl phosphate, human liver homolog" compartment="c" hasOnlySubstanceUnits="false" boundaryCondition="false" constant="false">
        <notes>
          <body xmlns="http://www.w3.org/1999/xhtml">
            <p>FORMULA: C1140H1868O90P10</p>
            <p>CHARGE: 0</p>
          </body>
        </notes>
      </species>
      <species id="M_dolglcp_U_c" name="Dolichyl beta-D-glucosyl phosphate, human uterine homolog" compartment="c" hasOnlySubstanceUnits="false" boundaryCondition="false" constant="false">
        <notes>
          <body xmlns="http://www.w3.org/1999/xhtml">
            <p>FORMULA: C1085H1780O90P10</p>
            <p>CHARGE: 0</p>
          </body>
        </notes>
      </species>
      <species id="M_dolichol_L_c" name="Dolichol, human liver homolog" compartment="c" hasOnlySubstanceUnits="false" boundaryCondition="false" constant="false">
        <notes>
          <body xmlns="http://www.w3.org/1999/xhtml">
            <p>FORMULA: C1080H1768O10</p>
            <p>CHARGE: 0</p>
          </body>
        </notes>
      </species>
      <species id="M_dolichol_U_c" name="Dolichol, human uterine homolog" compartment="c" hasOnlySubstanceUnits="false" boundaryCondition="false" constant="false">
        <notes>
          <body xmlns="http://www.w3.org/1999/xhtml">
            <p>FORMULA: C1025H1680O10</p>
            <p>CHARGE: 0</p>
          </body>
        </notes>
      </species>
      <species id="M_dolmanp_L_c" name="Dolichyl phosphate D-mannose, human liver homolog" compartment="c" hasOnlySubstanceUnits="false" boundaryCondition="false" constant="false">
        <notes>
          <body xmlns="http://www.w3.org/1999/xhtml">
            <p>FORMULA: C1140H1868O90P10</p>
            <p>CHARGE: 0</p>
          </body>
        </notes>
      </species>
      <species id="M_dolmanp_U_c" name="Dolichyl phosphate D-mannose, human uterine homolog" compartment="c" hasOnlySubstanceUnits="false" boundaryCondition="false" constant="false">
        <notes>
          <body xmlns="http://www.w3.org/1999/xhtml">
            <p>FORMULA: C1085H1780O90P10</p>
            <p>CHARGE: 0</p>
          </body>
        </notes>
      </species>
      <species id="M_dolp_L_c" name="Dolichol phosphate, human liver homolog" compartment="c" hasOnlySubstanceUnits="false" boundaryCondition="false" constant="false">
        <notes>
          <body xmlns="http://www.w3.org/1999/xhtml">
            <p>FORMULA: C1080H1758O40P10</p>
            <p>CHARGE: 0</p>
          </body>
        </notes>
      </species>
      <species id="M_dolp_U_c" name="Dolichol phosphate, human uterine homolog" compartment="c" hasOnlySubstanceUnits="false" boundaryCondition="false" constant="false">
        <notes>
          <body xmlns="http://www.w3.org/1999/xhtml">
            <p>FORMULA: C1025H1670O40P10</p>
            <p>CHARGE: 0</p>
          </body>
        </notes>
      </species>
      <species id="M_dopa_c" name="Dopamine" compartment="c" hasOnlySubstanceUnits="false" boundaryCondition="false" constant="false">
        <notes>
          <body xmlns="http://www.w3.org/1999/xhtml">
            <p>FORMULA: C8H12NO2</p>
            <p>CHARGE: 0</p>
          </body>
        </notes>
      </species>
      <species id="M_dopa_e" name="Dopamine" compartment="e" hasOnlySubstanceUnits="false" boundaryCondition="false" constant="false">
        <notes>
          <body xmlns="http://www.w3.org/1999/xhtml">
            <p>FORMULA: C8H12NO2</p>
            <p>CHARGE: 0</p>
          </body>
        </notes>
      </species>
      <species id="M_dopaqn_c" name="Dopaquinone" compartment="c" hasOnlySubstanceUnits="false" boundaryCondition="false" constant="false">
        <notes>
          <body xmlns="http://www.w3.org/1999/xhtml">
            <p>FORMULA: C9H9NO4</p>
            <p>CHARGE: 0</p>
          </body>
        </notes>
      </species>
      <species id="M_dopasf_c" name="Dopamine 3-O-sulfate" compartment="c" hasOnlySubstanceUnits="false" boundaryCondition="false" constant="false">
        <notes>
          <body xmlns="http://www.w3.org/1999/xhtml">
            <p>FORMULA: C8H11NO5S</p>
            <p>CHARGE: 0</p>
          </body>
        </notes>
      </species>
      <species id="M_dopasf_e" name="Dopamine 3-O-sulfate" compartment="e" hasOnlySubstanceUnits="false" boundaryCondition="false" constant="false">
        <notes>
          <body xmlns="http://www.w3.org/1999/xhtml">
            <p>FORMULA: C8H11NO5S</p>
            <p>CHARGE: 0</p>
          </body>
        </notes>
      </species>
      <species id="M_dpcoa_c" name="Dephospho-CoA" compartment="c" hasOnlySubstanceUnits="false" boundaryCondition="false" constant="false">
        <notes>
          <body xmlns="http://www.w3.org/1999/xhtml">
            <p>FORMULA: C21H33N7O13P2S</p>
            <p>CHARGE: 0</p>
          </body>
        </notes>
      </species>
      <species id="M_drib_c" name="Deoxyribose" compartment="c" hasOnlySubstanceUnits="false" boundaryCondition="false" constant="false">
        <notes>
          <body xmlns="http://www.w3.org/1999/xhtml">
            <p>FORMULA: C5H10O4</p>
            <p>CHARGE: 0</p>
          </body>
        </notes>
      </species>
      <species id="M_drib_e" name="Deoxyribose" compartment="e" hasOnlySubstanceUnits="false" boundaryCondition="false" constant="false">
        <notes>
          <body xmlns="http://www.w3.org/1999/xhtml">
            <p>FORMULA: C5H10O4</p>
            <p>CHARGE: 0</p>
          </body>
        </notes>
      </species>
      <species id="M_dsT_antigen_c" name="disialyl-T antigen" compartment="c" hasOnlySubstanceUnits="false" boundaryCondition="false" constant="false">
        <notes>
          <body xmlns="http://www.w3.org/1999/xhtml">
            <p>FORMULA: C36H56N3O26X</p>
            <p>CHARGE: 0</p>
          </body>
        </notes>
      </species>
      <species id="M_dsmsterol_c" name="Desmosterol" compartment="c" hasOnlySubstanceUnits="false" boundaryCondition="false" constant="false">
        <notes>
          <body xmlns="http://www.w3.org/1999/xhtml">
            <p>FORMULA: C27H44O</p>
            <p>CHARGE: 0</p>
          </body>
        </notes>
      </species>
      <species id="M_dtdp4d6dg_c" name="dTDP-4-dehydro-6-deoxy-D-glucose" compartment="c" hasOnlySubstanceUnits="false" boundaryCondition="false" constant="false">
        <notes>
          <body xmlns="http://www.w3.org/1999/xhtml">
            <p>FORMULA: C16H22N2O15P2</p>
            <p>CHARGE: 0</p>
          </body>
        </notes>
      </species>
      <species id="M_dtdp4d6dm_c" name="dTDP-4-dehydro-6-deoxy-L-mannose" compartment="c" hasOnlySubstanceUnits="false" boundaryCondition="false" constant="false">
        <notes>
          <body xmlns="http://www.w3.org/1999/xhtml">
            <p>FORMULA: C16H22N2O15P2</p>
            <p>CHARGE: 0</p>
          </body>
        </notes>
      </species>
      <species id="M_dtdp_c" name="dTDP" compartment="c" hasOnlySubstanceUnits="false" boundaryCondition="false" constant="false">
        <notes>
          <body xmlns="http://www.w3.org/1999/xhtml">
            <p>FORMULA: C10H13N2O11P2</p>
            <p>CHARGE: 0</p>
          </body>
        </notes>
      </species>
      <species id="M_dtdpglu_c" name="dTDPglucose" compartment="c" hasOnlySubstanceUnits="false" boundaryCondition="false" constant="false">
        <notes>
          <body xmlns="http://www.w3.org/1999/xhtml">
            <p>FORMULA: C16H24N2O16P2</p>
            <p>CHARGE: 0</p>
          </body>
        </notes>
      </species>
      <species id="M_dtdprmn_c" name="dTDP-L-rhamnose" compartment="c" hasOnlySubstanceUnits="false" boundaryCondition="false" constant="false">
        <notes>
          <body xmlns="http://www.w3.org/1999/xhtml">
            <p>FORMULA: C16H24N2O15P2</p>
            <p>CHARGE: 0</p>
          </body>
        </notes>
      </species>
      <species id="M_dtmp_c" name="dTMP" compartment="c" hasOnlySubstanceUnits="false" boundaryCondition="false" constant="false">
        <notes>
          <body xmlns="http://www.w3.org/1999/xhtml">
            <p>FORMULA: C10H13N2O8P</p>
            <p>CHARGE: 0</p>
          </body>
        </notes>
      </species>
      <species id="M_dttOX_c" name="Oxidized dithiothreitol" compartment="c" hasOnlySubstanceUnits="false" boundaryCondition="false" constant="false">
        <notes>
          <body xmlns="http://www.w3.org/1999/xhtml">
            <p>FORMULA: C4H8O2S2</p>
            <p>CHARGE: 0</p>
          </body>
        </notes>
      </species>
      <species id="M_dtt_c" name="Dithiothreitol" compartment="c" hasOnlySubstanceUnits="false" boundaryCondition="false" constant="false">
        <notes>
          <body xmlns="http://www.w3.org/1999/xhtml">
            <p>FORMULA: C4H10O2S2</p>
            <p>CHARGE: 0</p>
          </body>
        </notes>
      </species>
      <species id="M_dttp_c" name="dTTP" compartment="c" hasOnlySubstanceUnits="false" boundaryCondition="false" constant="false">
        <notes>
          <body xmlns="http://www.w3.org/1999/xhtml">
            <p>FORMULA: C10H13N2O14P3</p>
            <p>CHARGE: 0</p>
          </body>
        </notes>
      </species>
      <species id="M_dudp_c" name="dUDP" compartment="c" hasOnlySubstanceUnits="false" boundaryCondition="false" constant="false">
        <notes>
          <body xmlns="http://www.w3.org/1999/xhtml">
            <p>FORMULA: C9H11N2O11P2</p>
            <p>CHARGE: 0</p>
          </body>
        </notes>
      </species>
      <species id="M_dump_c" name="dUMP" compartment="c" hasOnlySubstanceUnits="false" boundaryCondition="false" constant="false">
        <notes>
          <body xmlns="http://www.w3.org/1999/xhtml">
            <p>FORMULA: C9H11N2O8P</p>
            <p>CHARGE: 0</p>
          </body>
        </notes>
      </species>
      <species id="M_duri_c" name="Deoxyuridine" compartment="c" hasOnlySubstanceUnits="false" boundaryCondition="false" constant="false">
        <notes>
          <body xmlns="http://www.w3.org/1999/xhtml">
            <p>FORMULA: C9H12N2O5</p>
            <p>CHARGE: 0</p>
          </body>
        </notes>
      </species>
      <species id="M_duri_e" name="Deoxyuridine" compartment="e" hasOnlySubstanceUnits="false" boundaryCondition="false" constant="false">
        <notes>
          <body xmlns="http://www.w3.org/1999/xhtml">
            <p>FORMULA: C9H12N2O5</p>
            <p>CHARGE: 0</p>
          </body>
        </notes>
      </species>
      <species id="M_dutp_c" name="dUTP" compartment="c" hasOnlySubstanceUnits="false" boundaryCondition="false" constant="false">
        <notes>
          <body xmlns="http://www.w3.org/1999/xhtml">
            <p>FORMULA: C9H11N2O14P3</p>
            <p>CHARGE: 0</p>
          </body>
        </notes>
      </species>
      <species id="M_dxtrn_c" name="phosphorylase-limit dextrin (glycogenin-1,6{4[1,4-Glc], 4[1,4-Glc]})" compartment="c" hasOnlySubstanceUnits="false" boundaryCondition="false" constant="false">
        <notes>
          <body xmlns="http://www.w3.org/1999/xhtml">
            <p>FORMULA: C48H81O41X</p>
            <p>CHARGE: 0</p>
          </body>
        </notes>
      </species>
      <species id="M_e4hglu_c" name="L-erythro-4-Hydroxyglutamate" compartment="c" hasOnlySubstanceUnits="false" boundaryCondition="false" constant="false">
        <notes>
          <body xmlns="http://www.w3.org/1999/xhtml">
            <p>FORMULA: C5H8NO5</p>
            <p>CHARGE: 0</p>
          </body>
        </notes>
      </species>
      <species id="M_e4p_c" name="D-Erythrose 4-phosphate" compartment="c" hasOnlySubstanceUnits="false" boundaryCondition="false" constant="false">
        <notes>
          <body xmlns="http://www.w3.org/1999/xhtml">
            <p>FORMULA: C4H7O7P</p>
            <p>CHARGE: 0</p>
          </body>
        </notes>
      </species>
      <species id="M_eaflatoxin_c" name="8,9 epxoy aflatoxin B1" compartment="c" hasOnlySubstanceUnits="false" boundaryCondition="false" constant="false">
        <notes>
          <body xmlns="http://www.w3.org/1999/xhtml">
            <p>FORMULA: C17H12O7</p>
            <p>CHARGE: 0</p>
          </body>
        </notes>
      </species>
      <species id="M_eaflatoxin_e" name="8,9 epxoy aflatoxin B1" compartment="e" hasOnlySubstanceUnits="false" boundaryCondition="false" constant="false">
        <notes>
          <body xmlns="http://www.w3.org/1999/xhtml">
            <p>FORMULA: C17H12O7</p>
            <p>CHARGE: 0</p>
          </body>
        </notes>
      </species>
      <species id="M_eandrstrn_c" name="epiandrosterone" compartment="c" hasOnlySubstanceUnits="false" boundaryCondition="false" constant="false">
        <notes>
          <body xmlns="http://www.w3.org/1999/xhtml">
            <p>FORMULA: C19H28O3</p>
            <p>CHARGE: 0</p>
          </body>
        </notes>
      </species>
      <species id="M_ebastine_c" name="ebastine" compartment="c" hasOnlySubstanceUnits="false" boundaryCondition="false" constant="false">
        <notes>
          <body xmlns="http://www.w3.org/1999/xhtml">
            <p>FORMULA: C32H39NO2</p>
            <p>CHARGE: 0</p>
          </body>
        </notes>
      </species>
      <species id="M_ebastine_e" name="ebastine" compartment="e" hasOnlySubstanceUnits="false" boundaryCondition="false" constant="false">
        <notes>
          <body xmlns="http://www.w3.org/1999/xhtml">
            <p>FORMULA: C32H39NO2</p>
            <p>CHARGE: 0</p>
          </body>
        </notes>
      </species>
      <species id="M_ebastineoh_c" name="hydroxylated ebastine" compartment="c" hasOnlySubstanceUnits="false" boundaryCondition="false" constant="false">
        <notes>
          <body xmlns="http://www.w3.org/1999/xhtml">
            <p>FORMULA: C32H39NO3</p>
            <p>CHARGE: 0</p>
          </body>
        </notes>
      </species>
      <species id="M_ebastineoh_e" name="hydroxylated ebastine" compartment="e" hasOnlySubstanceUnits="false" boundaryCondition="false" constant="false">
        <notes>
          <body xmlns="http://www.w3.org/1999/xhtml">
            <p>FORMULA: C32H39NO3</p>
            <p>CHARGE: 0</p>
          </body>
        </notes>
      </species>
      <species id="M_ecgon_c" name="ecgonine" compartment="c" hasOnlySubstanceUnits="false" boundaryCondition="false" constant="false">
        <notes>
          <body xmlns="http://www.w3.org/1999/xhtml">
            <p>FORMULA: C9H14NO3</p>
            <p>CHARGE: 0</p>
          </body>
        </notes>
      </species>
      <species id="M_egme_c" name="ecgonine methyl ester" compartment="c" hasOnlySubstanceUnits="false" boundaryCondition="false" constant="false">
        <notes>
          <body xmlns="http://www.w3.org/1999/xhtml">
            <p>FORMULA: C10H17NO3</p>
            <p>CHARGE: 0</p>
          </body>
        </notes>
      </species>
      <species id="M_eicostet_c" name="eicosatetranoic acid" compartment="c" hasOnlySubstanceUnits="false" boundaryCondition="false" constant="false">
        <notes>
          <body xmlns="http://www.w3.org/1999/xhtml">
            <p>FORMULA: C20H31O2</p>
            <p>CHARGE: 0</p>
          </body>
        </notes>
      </species>
      <species id="M_eicostet_e" name="eicosatetranoic acid" compartment="e" hasOnlySubstanceUnits="false" boundaryCondition="false" constant="false">
        <notes>
          <body xmlns="http://www.w3.org/1999/xhtml">
            <p>FORMULA: C20H31O2</p>
            <p>CHARGE: 0</p>
          </body>
        </notes>
      </species>
      <species id="M_eicostetcoa_c" name="eicosatetranoyl coenzyme A" compartment="c" hasOnlySubstanceUnits="false" boundaryCondition="false" constant="false">
        <notes>
          <body xmlns="http://www.w3.org/1999/xhtml">
            <p>FORMULA: C41H62N7O17P3S</p>
            <p>CHARGE: 0</p>
          </body>
        </notes>
      </species>
      <species id="M_eicostetcrn_c" name="Eicosatetranoyl carnitine" compartment="c" hasOnlySubstanceUnits="false" boundaryCondition="false" constant="false">
        <notes>
          <body xmlns="http://www.w3.org/1999/xhtml">
            <p>FORMULA: C27H45NO4</p>
            <p>CHARGE: 0</p>
          </body>
        </notes>
      </species>
      <species id="M_elaid_c" name="elaidic acid" compartment="c" hasOnlySubstanceUnits="false" boundaryCondition="false" constant="false">
        <notes>
          <body xmlns="http://www.w3.org/1999/xhtml">
            <p>FORMULA: C18H33O2</p>
            <p>CHARGE: 0</p>
          </body>
        </notes>
      </species>
      <species id="M_elaid_e" name="elaidic acid" compartment="e" hasOnlySubstanceUnits="false" boundaryCondition="false" constant="false">
        <notes>
          <body xmlns="http://www.w3.org/1999/xhtml">
            <p>FORMULA: C18H33O2</p>
            <p>CHARGE: 0</p>
          </body>
        </notes>
      </species>
      <species id="M_elaidcrn_c" name="Elaidic carnitine" compartment="c" hasOnlySubstanceUnits="false" boundaryCondition="false" constant="false">
        <notes>
          <body xmlns="http://www.w3.org/1999/xhtml">
            <p>FORMULA: C25H47NO4</p>
            <p>CHARGE: 0</p>
          </body>
        </notes>
      </species>
      <species id="M_em2emgacpail_hs_c" name="(phosphoethanolaminyl-dimannosyl),(phosphoethanolaminyl)-mannosyl-glucosaminyl-acylphosphatidylinositol (H7)" compartment="c" hasOnlySubstanceUnits="false" boundaryCondition="false" constant="false">
        <notes>
          <body xmlns="http://www.w3.org/1999/xhtml">
            <p>FORMULA: C53H100N3O35P3FULLRCO2FULLR2CO2</p>
            <p>CHARGE: 0</p>
          </body>
        </notes>
      </species>
      <species id="M_em2emgacpail_prot_hs_c" name="(phosphoethanolaminyl-dimannosyl),(phosphoethanolaminyl)-mannosyl-glucosaminyl-acylphosphatidylinositol" compartment="c" hasOnlySubstanceUnits="false" boundaryCondition="false" constant="false">
        <notes>
          <body xmlns="http://www.w3.org/1999/xhtml">
            <p>FORMULA: C53H100N3O35P3FULLRCO2FULLR2CO2X</p>
            <p>CHARGE: 0</p>
          </body>
        </notes>
      </species>
      <species id="M_em3gacpail_hs_c" name="phosphoethanolaminyl-trimannosyl-glucosaminyl-acylphosphatidylinositol (H6&apos;)" compartment="c" hasOnlySubstanceUnits="false" boundaryCondition="false" constant="false">
        <notes>
          <body xmlns="http://www.w3.org/1999/xhtml">
            <p>FORMULA: C51H94N2O32P2FULLRCO2FULLR2CO2</p>
            <p>CHARGE: 0</p>
          </body>
        </notes>
      </species>
      <species id="M_emem2gacpail_hs_c" name="(phosphoethanolaminyl-mannosyl),(phosphoethanolaminyl)-dimannosyl-glucosaminyl-acylphosphatidylinositol (H7&apos;)" compartment="c" hasOnlySubstanceUnits="false" boundaryCondition="false" constant="false">
        <notes>
          <body xmlns="http://www.w3.org/1999/xhtml">
            <p>FORMULA: C53H100N3O35P3FULLRCO2FULLR2CO2</p>
            <p>CHARGE: 0</p>
          </body>
        </notes>
      </species>
      <species id="M_emgacpail_hs_c" name="phosphoethanolaminyl-mannosyl-glucosylaminyl-acylphosphatidylinositol (H5)" compartment="c" hasOnlySubstanceUnits="false" boundaryCondition="false" constant="false">
        <notes>
          <body xmlns="http://www.w3.org/1999/xhtml">
            <p>FORMULA: C39H74N2O22P2FULLRCO2FULLR2CO2</p>
            <p>CHARGE: 0</p>
          </body>
        </notes>
      </species>
      <species id="M_eryth_c" name="L-Erythrulose" compartment="c" hasOnlySubstanceUnits="false" boundaryCondition="false" constant="false">
        <notes>
          <body xmlns="http://www.w3.org/1999/xhtml">
            <p>FORMULA: C4H8O4</p>
            <p>CHARGE: 0</p>
          </body>
        </notes>
      </species>
      <species id="M_estradiol_c" name="Estradiol" compartment="c" hasOnlySubstanceUnits="false" boundaryCondition="false" constant="false">
        <notes>
          <body xmlns="http://www.w3.org/1999/xhtml">
            <p>FORMULA: C18H24O2</p>
            <p>CHARGE: 0</p>
          </body>
        </notes>
      </species>
      <species id="M_estradiolglc_c" name="estradiol glucuronide" compartment="c" hasOnlySubstanceUnits="false" boundaryCondition="false" constant="false">
        <notes>
          <body xmlns="http://www.w3.org/1999/xhtml">
            <p>FORMULA: C24H32O8</p>
            <p>CHARGE: 0</p>
          </body>
        </notes>
      </species>
      <species id="M_estradiolglc_e" name="estradiol glucuronide" compartment="e" hasOnlySubstanceUnits="false" boundaryCondition="false" constant="false">
        <notes>
          <body xmlns="http://www.w3.org/1999/xhtml">
            <p>FORMULA: C24H32O8</p>
            <p>CHARGE: 0</p>
          </body>
        </notes>
      </species>
      <species id="M_estriol_c" name="estriol" compartment="c" hasOnlySubstanceUnits="false" boundaryCondition="false" constant="false">
        <notes>
          <body xmlns="http://www.w3.org/1999/xhtml">
            <p>FORMULA: C18H24O3</p>
            <p>CHARGE: 0</p>
          </body>
        </notes>
      </species>
      <species id="M_estriolglc_c" name="16-Glucuronide-estriol" compartment="c" hasOnlySubstanceUnits="false" boundaryCondition="false" constant="false">
        <notes>
          <body xmlns="http://www.w3.org/1999/xhtml">
            <p>FORMULA: C24H32O9</p>
            <p>CHARGE: 0</p>
          </body>
        </notes>
      </species>
      <species id="M_estriolglc_e" name="16-Glucuronide-estriol" compartment="e" hasOnlySubstanceUnits="false" boundaryCondition="false" constant="false">
        <notes>
          <body xmlns="http://www.w3.org/1999/xhtml">
            <p>FORMULA: C24H32O9</p>
            <p>CHARGE: 0</p>
          </body>
        </notes>
      </species>
      <species id="M_estrone_c" name="Estrone" compartment="c" hasOnlySubstanceUnits="false" boundaryCondition="false" constant="false">
        <notes>
          <body xmlns="http://www.w3.org/1999/xhtml">
            <p>FORMULA: C18H22O2</p>
            <p>CHARGE: 0</p>
          </body>
        </notes>
      </species>
      <species id="M_estroneglc_c" name="estrone glucuronide" compartment="c" hasOnlySubstanceUnits="false" boundaryCondition="false" constant="false">
        <notes>
          <body xmlns="http://www.w3.org/1999/xhtml">
            <p>FORMULA: C24H30O8</p>
            <p>CHARGE: 0</p>
          </body>
        </notes>
      </species>
      <species id="M_estroneglc_e" name="estrone glucuronide" compartment="e" hasOnlySubstanceUnits="false" boundaryCondition="false" constant="false">
        <notes>
          <body xmlns="http://www.w3.org/1999/xhtml">
            <p>FORMULA: C24H30O8</p>
            <p>CHARGE: 0</p>
          </body>
        </notes>
      </species>
      <species id="M_estrones_c" name="Estrone 3-sulfate" compartment="c" hasOnlySubstanceUnits="false" boundaryCondition="false" constant="false">
        <notes>
          <body xmlns="http://www.w3.org/1999/xhtml">
            <p>FORMULA: C18H21O5S</p>
            <p>CHARGE: 0</p>
          </body>
        </notes>
      </species>
      <species id="M_estrones_e" name="Estrone 3-sulfate" compartment="e" hasOnlySubstanceUnits="false" boundaryCondition="false" constant="false">
        <notes>
          <body xmlns="http://www.w3.org/1999/xhtml">
            <p>FORMULA: C18H21O5S</p>
            <p>CHARGE: 0</p>
          </body>
        </notes>
      </species>
      <species id="M_etfox_c" name="Electron transfer flavoprotein oxidized" compartment="c" hasOnlySubstanceUnits="false" boundaryCondition="false" constant="false">
        <notes>
          <body xmlns="http://www.w3.org/1999/xhtml">
            <p>FORMULA: R</p>
            <p>CHARGE: 0</p>
          </body>
        </notes>
      </species>
      <species id="M_etfrd_c" name="Electron transfer flavoprotein reduced" compartment="c" hasOnlySubstanceUnits="false" boundaryCondition="false" constant="false">
        <notes>
          <body xmlns="http://www.w3.org/1999/xhtml">
            <p>FORMULA: RH2</p>
            <p>CHARGE: 0</p>
          </body>
        </notes>
      </species>
      <species id="M_etha_c" name="Ethanolamine" compartment="c" hasOnlySubstanceUnits="false" boundaryCondition="false" constant="false">
        <notes>
          <body xmlns="http://www.w3.org/1999/xhtml">
            <p>FORMULA: C2H8NO</p>
            <p>CHARGE: 0</p>
          </body>
        </notes>
      </species>
      <species id="M_ethamp_c" name="Ethanolamine phosphate" compartment="c" hasOnlySubstanceUnits="false" boundaryCondition="false" constant="false">
        <notes>
          <body xmlns="http://www.w3.org/1999/xhtml">
            <p>FORMULA: C2H7NO4P</p>
            <p>CHARGE: 0</p>
          </body>
        </notes>
      </species>
      <species id="M_etoh_c" name="Ethanol" compartment="c" hasOnlySubstanceUnits="false" boundaryCondition="false" constant="false">
        <notes>
          <body xmlns="http://www.w3.org/1999/xhtml">
            <p>FORMULA: C2H6O</p>
            <p>CHARGE: 0</p>
          </body>
        </notes>
      </species>
      <species id="M_etoh_e" name="Ethanol" compartment="e" hasOnlySubstanceUnits="false" boundaryCondition="false" constant="false">
        <notes>
          <body xmlns="http://www.w3.org/1999/xhtml">
            <p>FORMULA: C2H6O</p>
            <p>CHARGE: 0</p>
          </body>
        </notes>
      </species>
      <species id="M_f1a_c" name="F1alpha" compartment="c" hasOnlySubstanceUnits="false" boundaryCondition="false" constant="false">
        <notes>
          <body xmlns="http://www.w3.org/1999/xhtml">
            <p>FORMULA: C22H37N2O15X</p>
            <p>CHARGE: 0</p>
          </body>
        </notes>
      </species>
      <species id="M_f1p_c" name="D-Fructose 1-phosphate" compartment="c" hasOnlySubstanceUnits="false" boundaryCondition="false" constant="false">
        <notes>
          <body xmlns="http://www.w3.org/1999/xhtml">
            <p>FORMULA: C6H11O9P</p>
            <p>CHARGE: 0</p>
          </body>
        </notes>
      </species>
      <species id="M_f26bp_c" name="D-Fructose 2,6-bisphosphate" compartment="c" hasOnlySubstanceUnits="false" boundaryCondition="false" constant="false">
        <notes>
          <body xmlns="http://www.w3.org/1999/xhtml">
            <p>FORMULA: C6H10O12P2</p>
            <p>CHARGE: 0</p>
          </body>
        </notes>
      </species>
      <species id="M_f5hoxkyn_c" name="Formyl-5-hydroxykynurenamine" compartment="c" hasOnlySubstanceUnits="false" boundaryCondition="false" constant="false">
        <notes>
          <body xmlns="http://www.w3.org/1999/xhtml">
            <p>FORMULA: C10H13N2O3</p>
            <p>CHARGE: 0</p>
          </body>
        </notes>
      </species>
      <species id="M_f6p_c" name="D-Fructose 6-phosphate" compartment="c" hasOnlySubstanceUnits="false" boundaryCondition="false" constant="false">
        <notes>
          <body xmlns="http://www.w3.org/1999/xhtml">
            <p>FORMULA: C6H11O9P</p>
            <p>CHARGE: 0</p>
          </body>
        </notes>
      </species>
      <species id="M_fad_c" name="Flavin adenine dinucleotide oxidized" compartment="c" hasOnlySubstanceUnits="false" boundaryCondition="false" constant="false">
        <notes>
          <body xmlns="http://www.w3.org/1999/xhtml">
            <p>FORMULA: C27H31N9O15P2</p>
            <p>CHARGE: 0</p>
          </body>
        </notes>
      </species>
      <species id="M_fadh2_c" name="Flavin adenine dinucleotide reduced" compartment="c" hasOnlySubstanceUnits="false" boundaryCondition="false" constant="false">
        <notes>
          <body xmlns="http://www.w3.org/1999/xhtml">
            <p>FORMULA: C27H33N9O15P2</p>
            <p>CHARGE: 0</p>
          </body>
        </notes>
      </species>
      <species id="M_fald_c" name="Formaldehyde" compartment="c" hasOnlySubstanceUnits="false" boundaryCondition="false" constant="false">
        <notes>
          <body xmlns="http://www.w3.org/1999/xhtml">
            <p>FORMULA: CH2O</p>
            <p>CHARGE: 0</p>
          </body>
        </notes>
      </species>
      <species id="M_fdp_c" name="D-Fructose 1,6-bisphosphate" compartment="c" hasOnlySubstanceUnits="false" boundaryCondition="false" constant="false">
        <notes>
          <body xmlns="http://www.w3.org/1999/xhtml">
            <p>FORMULA: C6H10O12P2</p>
            <p>CHARGE: 0</p>
          </body>
        </notes>
      </species>
      <species id="M_fe2_c" name="Fe2+" compartment="c" hasOnlySubstanceUnits="false" boundaryCondition="false" constant="false">
        <notes>
          <body xmlns="http://www.w3.org/1999/xhtml">
            <p>FORMULA: Fe</p>
            <p>CHARGE: 0</p>
          </body>
        </notes>
      </species>
      <species id="M_fe2_e" name="Fe2+" compartment="e" hasOnlySubstanceUnits="false" boundaryCondition="false" constant="false">
        <notes>
          <body xmlns="http://www.w3.org/1999/xhtml">
            <p>FORMULA: Fe</p>
            <p>CHARGE: 0</p>
          </body>
        </notes>
      </species>
      <species id="M_fe3_e" name="Fe3+" compartment="e" hasOnlySubstanceUnits="false" boundaryCondition="false" constant="false">
        <notes>
          <body xmlns="http://www.w3.org/1999/xhtml">
            <p>FORMULA: Fe</p>
            <p>CHARGE: 0</p>
          </body>
        </notes>
      </species>
      <species id="M_fgam_c" name="N2-Formyl-N1-(5-phospho-D-ribosyl)glycinamide" compartment="c" hasOnlySubstanceUnits="false" boundaryCondition="false" constant="false">
        <notes>
          <body xmlns="http://www.w3.org/1999/xhtml">
            <p>FORMULA: C8H13N2O9P</p>
            <p>CHARGE: 0</p>
          </body>
        </notes>
      </species>
      <species id="M_ficytC_c" name="Ferricytochrome c" compartment="c" hasOnlySubstanceUnits="false" boundaryCondition="false" constant="false">
        <notes>
          <body xmlns="http://www.w3.org/1999/xhtml">
            <p>FORMULA: C42H54FeN8O6S2</p>
            <p>CHARGE: 0</p>
          </body>
        </notes>
      </species>
      <species id="M_fmn_c" name="FMN" compartment="c" hasOnlySubstanceUnits="false" boundaryCondition="false" constant="false">
        <notes>
          <body xmlns="http://www.w3.org/1999/xhtml">
            <p>FORMULA: C17H19N4O9P</p>
            <p>CHARGE: 0</p>
          </body>
        </notes>
      </species>
      <species id="M_fn2m2masn_c" name="N4-{N-Acetyl-beta-D-glucosaminyl-(1,2)-alpha-D-mannosyl-(1,3)-[N-acetyl-beta-D-glucosaminyl-(1,2)-alpha-D-mannosyl-(1,6)]-beta-D-mannosyl-(1,4)-N-acetyl-beta-D-glucosaminyl-(1,4)-[alpha-L-fucosyl-(1,6)]-N-acetyl-beta-D-glucosaminyl}asparagine" compartment="c" hasOnlySubstanceUnits="false" boundaryCondition="false" constant="false">
        <notes>
          <body xmlns="http://www.w3.org/1999/xhtml">
            <p>FORMULA: C56H93N4O39X</p>
            <p>CHARGE: 0</p>
          </body>
        </notes>
      </species>
      <species id="M_fna5moxam_c" name="Formyl-N-acetyl-5-methoxykynurenamine" compartment="c" hasOnlySubstanceUnits="false" boundaryCondition="false" constant="false">
        <notes>
          <body xmlns="http://www.w3.org/1999/xhtml">
            <p>FORMULA: C13H16N2O4</p>
            <p>CHARGE: 0</p>
          </body>
        </notes>
      </species>
      <species id="M_focytC_c" name="Ferrocytochrome C" compartment="c" hasOnlySubstanceUnits="false" boundaryCondition="false" constant="false">
        <notes>
          <body xmlns="http://www.w3.org/1999/xhtml">
            <p>FORMULA: C42H54FeN8O6S2</p>
            <p>CHARGE: 0</p>
          </body>
        </notes>
      </species>
      <species id="M_fol_c" name="Folate" compartment="c" hasOnlySubstanceUnits="false" boundaryCondition="false" constant="false">
        <notes>
          <body xmlns="http://www.w3.org/1999/xhtml">
            <p>FORMULA: C19H18N7O6</p>
            <p>CHARGE: 0</p>
          </body>
        </notes>
      </species>
      <species id="M_fol_e" name="Folate" compartment="e" hasOnlySubstanceUnits="false" boundaryCondition="false" constant="false">
        <notes>
          <body xmlns="http://www.w3.org/1999/xhtml">
            <p>FORMULA: C19H18N7O6</p>
            <p>CHARGE: 0</p>
          </body>
        </notes>
      </species>
      <species id="M_for_c" name="Formate" compartment="c" hasOnlySubstanceUnits="false" boundaryCondition="false" constant="false">
        <notes>
          <body xmlns="http://www.w3.org/1999/xhtml">
            <p>FORMULA: CH1O2</p>
            <p>CHARGE: 0</p>
          </body>
        </notes>
      </species>
      <species id="M_for_e" name="Formate" compartment="e" hasOnlySubstanceUnits="false" boundaryCondition="false" constant="false">
        <notes>
          <body xmlns="http://www.w3.org/1999/xhtml">
            <p>FORMULA: CH1O2</p>
            <p>CHARGE: 0</p>
          </body>
        </notes>
      </species>
      <species id="M_forglu_c" name="N-Formimidoyl-L-glutamate" compartment="c" hasOnlySubstanceUnits="false" boundaryCondition="false" constant="false">
        <notes>
          <body xmlns="http://www.w3.org/1999/xhtml">
            <p>FORMULA: C6H8N2O4</p>
            <p>CHARGE: 0</p>
          </body>
        </notes>
      </species>
      <species id="M_formcoa_c" name="Formyl-CoA" compartment="c" hasOnlySubstanceUnits="false" boundaryCondition="false" constant="false">
        <notes>
          <body xmlns="http://www.w3.org/1999/xhtml">
            <p>FORMULA: C22H36N7O17P3S</p>
            <p>CHARGE: 0</p>
          </body>
        </notes>
      </species>
      <species id="M_fpram_c" name="2-(Formamido)-N1-(5-phospho-D-ribosyl)acetamidine" compartment="c" hasOnlySubstanceUnits="false" boundaryCondition="false" constant="false">
        <notes>
          <body xmlns="http://www.w3.org/1999/xhtml">
            <p>FORMULA: C8H15N3O8P</p>
            <p>CHARGE: 0</p>
          </body>
        </notes>
      </species>
      <species id="M_fprica_c" name="5-Formamido-1-(5-phospho-D-ribosyl)imidazole-4-carboxamide" compartment="c" hasOnlySubstanceUnits="false" boundaryCondition="false" constant="false">
        <notes>
          <body xmlns="http://www.w3.org/1999/xhtml">
            <p>FORMULA: C10H13N4O9P</p>
            <p>CHARGE: 0</p>
          </body>
        </notes>
      </species>
      <species id="M_frdp_c" name="Farnesyl diphosphate" compartment="c" hasOnlySubstanceUnits="false" boundaryCondition="false" constant="false">
        <notes>
          <body xmlns="http://www.w3.org/1999/xhtml">
            <p>FORMULA: C15H25O7P2</p>
            <p>CHARGE: 0</p>
          </body>
        </notes>
      </species>
      <species id="M_fru_c" name="D-Fructose" compartment="c" hasOnlySubstanceUnits="false" boundaryCondition="false" constant="false">
        <notes>
          <body xmlns="http://www.w3.org/1999/xhtml">
            <p>FORMULA: C6H12O6</p>
            <p>CHARGE: 0</p>
          </body>
        </notes>
      </species>
      <species id="M_fru_e" name="D-Fructose" compartment="e" hasOnlySubstanceUnits="false" boundaryCondition="false" constant="false">
        <notes>
          <body xmlns="http://www.w3.org/1999/xhtml">
            <p>FORMULA: C6H12O6</p>
            <p>CHARGE: 0</p>
          </body>
        </notes>
      </species>
      <species id="M_fuc12gal14acglcgalgluside_hs_c" name="Type IIH glycolipid" compartment="c" hasOnlySubstanceUnits="false" boundaryCondition="false" constant="false">
        <notes>
          <body xmlns="http://www.w3.org/1999/xhtml">
            <p>FORMULA: C50H89N2O26FULLRCO</p>
            <p>CHARGE: 0</p>
          </body>
        </notes>
      </species>
      <species id="M_fuc132galacglcgal14acglcgalgluside_hs_c" name="V3Fuc-nLc6Cer" compartment="c" hasOnlySubstanceUnits="false" boundaryCondition="false" constant="false">
        <notes>
          <body xmlns="http://www.w3.org/1999/xhtml">
            <p>FORMULA: C64H112N3O36FULLRCO</p>
            <p>CHARGE: 0</p>
          </body>
        </notes>
      </species>
      <species id="M_fuc13galacglcgal14acglcgalgluside_hs_c" name="III3Fuc-nLc6Cer" compartment="c" hasOnlySubstanceUnits="false" boundaryCondition="false" constant="false">
        <notes>
          <body xmlns="http://www.w3.org/1999/xhtml">
            <p>FORMULA: C64H112N3O36FULLRCO</p>
            <p>CHARGE: 0</p>
          </body>
        </notes>
      </species>
      <species id="M_fuc13galacglcgal14acglcgalgluside_hs_e" name="III3Fuc-nLc6Cer" compartment="e" hasOnlySubstanceUnits="false" boundaryCondition="false" constant="false">
        <notes>
          <body xmlns="http://www.w3.org/1999/xhtml">
            <p>FORMULA: C64H112N3O36FULLRCO</p>
            <p>CHARGE: 0</p>
          </body>
        </notes>
      </species>
      <species id="M_fuc14galacglcgalgluside_hs_c" name="Lea glycolipid" compartment="c" hasOnlySubstanceUnits="false" boundaryCondition="false" constant="false">
        <notes>
          <body xmlns="http://www.w3.org/1999/xhtml">
            <p>FORMULA: C50H89N2O26FULLRCO</p>
            <p>CHARGE: 0</p>
          </body>
        </notes>
      </species>
      <species id="M_fuc14galacglcgalgluside_hs_e" name="Lea glycolipid" compartment="e" hasOnlySubstanceUnits="false" boundaryCondition="false" constant="false">
        <notes>
          <body xmlns="http://www.w3.org/1999/xhtml">
            <p>FORMULA: C50H89N2O26FULLRCO</p>
            <p>CHARGE: 0</p>
          </body>
        </notes>
      </species>
      <species id="M_fuc1p_DASH_L_c" name="L-Fucose 1-phosphate" compartment="c" hasOnlySubstanceUnits="false" boundaryCondition="false" constant="false">
        <notes>
          <body xmlns="http://www.w3.org/1999/xhtml">
            <p>FORMULA: C6H11O8P</p>
            <p>CHARGE: 0</p>
          </body>
        </notes>
      </species>
      <species id="M_fuc_DASH_L_c" name="L-Fucose" compartment="c" hasOnlySubstanceUnits="false" boundaryCondition="false" constant="false">
        <notes>
          <body xmlns="http://www.w3.org/1999/xhtml">
            <p>FORMULA: C6H12O5</p>
            <p>CHARGE: 0</p>
          </body>
        </notes>
      </species>
      <species id="M_fuc_DASH_L_e" name="L-Fucose" compartment="e" hasOnlySubstanceUnits="false" boundaryCondition="false" constant="false">
        <notes>
          <body xmlns="http://www.w3.org/1999/xhtml">
            <p>FORMULA: C6H12O5</p>
            <p>CHARGE: 0</p>
          </body>
        </notes>
      </species>
      <species id="M_fucacgalfucgalacglcgalgluside_hs_c" name="(Gal)2 (GalNAc)1 (Glc)1 (GlcNAc)1 (LFuc)2 (Cer)1" compartment="c" hasOnlySubstanceUnits="false" boundaryCondition="false" constant="false">
        <notes>
          <body xmlns="http://www.w3.org/1999/xhtml">
            <p>FORMULA: C64H112N3O35FULLRCO</p>
            <p>CHARGE: 0</p>
          </body>
        </notes>
      </species>
      <species id="M_fucacgalfucgalacglcgalgluside_hs_e" name="(Gal)2 (GalNAc)1 (Glc)1 (GlcNAc)1 (LFuc)2 (Cer)1" compartment="e" hasOnlySubstanceUnits="false" boundaryCondition="false" constant="false">
        <notes>
          <body xmlns="http://www.w3.org/1999/xhtml">
            <p>FORMULA: C64H112N3O35FULLRCO</p>
            <p>CHARGE: 0</p>
          </body>
        </notes>
      </species>
      <species id="M_fucacngal14acglcgalgluside_hs_c" name="IV3-a-NeuAc,III3-a-Fuc-nLc4Cer" compartment="c" hasOnlySubstanceUnits="false" boundaryCondition="false" constant="false">
        <notes>
          <body xmlns="http://www.w3.org/1999/xhtml">
            <p>FORMULA: C61H105N3O34FULLRCO</p>
            <p>CHARGE: 0</p>
          </body>
        </notes>
      </species>
      <species id="M_fucacngal14acglcgalgluside_hs_e" name="IV3-a-NeuAc,III3-a-Fuc-nLc4Cer" compartment="e" hasOnlySubstanceUnits="false" boundaryCondition="false" constant="false">
        <notes>
          <body xmlns="http://www.w3.org/1999/xhtml">
            <p>FORMULA: C61H105N3O34FULLRCO</p>
            <p>CHARGE: 0</p>
          </body>
        </notes>
      </species>
      <species id="M_fucacngalacglcgalgluside_hs_c" name="IV3-a-Neu5Ac,III4-a-Fuc-Lc4Cer" compartment="c" hasOnlySubstanceUnits="false" boundaryCondition="false" constant="false">
        <notes>
          <body xmlns="http://www.w3.org/1999/xhtml">
            <p>FORMULA: C61H105N3O34FULLRCO</p>
            <p>CHARGE: 0</p>
          </body>
        </notes>
      </species>
      <species id="M_fucacngalacglcgalgluside_hs_e" name="IV3-a-Neu5Ac,III4-a-Fuc-Lc4Cer" compartment="e" hasOnlySubstanceUnits="false" boundaryCondition="false" constant="false">
        <notes>
          <body xmlns="http://www.w3.org/1999/xhtml">
            <p>FORMULA: C61H105N3O34FULLRCO</p>
            <p>CHARGE: 0</p>
          </body>
        </notes>
      </species>
      <species id="M_fucfuc12gal14acglcgalgluside_hs_c" name="Ley glycolipid" compartment="c" hasOnlySubstanceUnits="false" boundaryCondition="false" constant="false">
        <notes>
          <body xmlns="http://www.w3.org/1999/xhtml">
            <p>FORMULA: C56H99N2O30FULLRCO</p>
            <p>CHARGE: 0</p>
          </body>
        </notes>
      </species>
      <species id="M_fucfuc12gal14acglcgalgluside_hs_e" name="Ley glycolipid" compartment="e" hasOnlySubstanceUnits="false" boundaryCondition="false" constant="false">
        <notes>
          <body xmlns="http://www.w3.org/1999/xhtml">
            <p>FORMULA: C56H99N2O30FULLRCO</p>
            <p>CHARGE: 0</p>
          </body>
        </notes>
      </species>
      <species id="M_fucfuc132galacglcgal14acglcgalgluside_hs_c" name="V3Fuc,III3Fuc-nLc6Cer" compartment="c" hasOnlySubstanceUnits="false" boundaryCondition="false" constant="false">
        <notes>
          <body xmlns="http://www.w3.org/1999/xhtml">
            <p>FORMULA: C70H122N3O40FULLRCO</p>
            <p>CHARGE: 0</p>
          </body>
        </notes>
      </species>
      <species id="M_fucfuc132galacglcgal14acglcgalgluside_hs_e" name="V3Fuc,III3Fuc-nLc6Cer" compartment="e" hasOnlySubstanceUnits="false" boundaryCondition="false" constant="false">
        <notes>
          <body xmlns="http://www.w3.org/1999/xhtml">
            <p>FORMULA: C70H122N3O40FULLRCO</p>
            <p>CHARGE: 0</p>
          </body>
        </notes>
      </species>
      <species id="M_fucfucfucgalacglc13galacglcgal14acglcgalgluside_hs_c" name="(Gal)4 (Glc)1 (GlcNAc)3 (LFuc)3 (Cer)1" compartment="c" hasOnlySubstanceUnits="false" boundaryCondition="false" constant="false">
        <notes>
          <body xmlns="http://www.w3.org/1999/xhtml">
            <p>FORMULA: C90H155N4O54FULLRCO</p>
            <p>CHARGE: 0</p>
          </body>
        </notes>
      </species>
      <species id="M_fucfucfucgalacglc13galacglcgal14acglcgalgluside_hs_e" name="(Gal)4 (Glc)1 (GlcNAc)3 (LFuc)3 (Cer)1" compartment="e" hasOnlySubstanceUnits="false" boundaryCondition="false" constant="false">
        <notes>
          <body xmlns="http://www.w3.org/1999/xhtml">
            <p>FORMULA: C90H155N4O54FULLRCO</p>
            <p>CHARGE: 0</p>
          </body>
        </notes>
      </species>
      <species id="M_fucfucfucgalacglcgal14acglcgalgluside_hs_c" name="(Gal)3 (Glc)1 (GlcNAc)2 (LFuc)3 (Cer)1" compartment="c" hasOnlySubstanceUnits="false" boundaryCondition="false" constant="false">
        <notes>
          <body xmlns="http://www.w3.org/1999/xhtml">
            <p>FORMULA: C76H132N3O44FULLRCO</p>
            <p>CHARGE: 0</p>
          </body>
        </notes>
      </species>
      <species id="M_fucfucfucgalacglcgal14acglcgalgluside_hs_e" name="(Gal)3 (Glc)1 (GlcNAc)2 (LFuc)3 (Cer)1" compartment="e" hasOnlySubstanceUnits="false" boundaryCondition="false" constant="false">
        <notes>
          <body xmlns="http://www.w3.org/1999/xhtml">
            <p>FORMULA: C76H132N3O44FULLRCO</p>
            <p>CHARGE: 0</p>
          </body>
        </notes>
      </species>
      <species id="M_fucfucgalacglc13galacglcgal14acglcgalgluside_hs_c" name="(Gal)4 (Glc)1 (GlcNAc)3 (LFuc)2 (Cer)1" compartment="c" hasOnlySubstanceUnits="false" boundaryCondition="false" constant="false">
        <notes>
          <body xmlns="http://www.w3.org/1999/xhtml">
            <p>FORMULA: C84H145N4O50FULLRCO</p>
            <p>CHARGE: 0</p>
          </body>
        </notes>
      </species>
      <species id="M_fucfucgalacglcgal14acglcgalgluside_hs_c" name="(Gal)3 (Glc)1 (GlcNAc)2 (LFuc)2 (Cer)1" compartment="c" hasOnlySubstanceUnits="false" boundaryCondition="false" constant="false">
        <notes>
          <body xmlns="http://www.w3.org/1999/xhtml">
            <p>FORMULA: C70H122N3O40FULLRCO</p>
            <p>CHARGE: 0</p>
          </body>
        </notes>
      </species>
      <species id="M_fucfucgalacglcgalacglcgal14acglcgalgluside_hs_c" name="(Gal)4 (Glc)1 (GlcNAc)3 (LFuc)2 (Cer)1" compartment="c" hasOnlySubstanceUnits="false" boundaryCondition="false" constant="false">
        <notes>
          <body xmlns="http://www.w3.org/1999/xhtml">
            <p>FORMULA: C84H145N4O50FULLRCO</p>
            <p>CHARGE: 0</p>
          </body>
        </notes>
      </species>
      <species id="M_fucfucgalacglcgalgluside_hs_c" name="Leb glycolipid" compartment="c" hasOnlySubstanceUnits="false" boundaryCondition="false" constant="false">
        <notes>
          <body xmlns="http://www.w3.org/1999/xhtml">
            <p>FORMULA: C56H99N2O30FULLRCO</p>
            <p>CHARGE: 0</p>
          </body>
        </notes>
      </species>
      <species id="M_fucfucgalacglcgalgluside_hs_e" name="Leb glycolipid" compartment="e" hasOnlySubstanceUnits="false" boundaryCondition="false" constant="false">
        <notes>
          <body xmlns="http://www.w3.org/1999/xhtml">
            <p>FORMULA: C56H99N2O30FULLRCO</p>
            <p>CHARGE: 0</p>
          </body>
        </notes>
      </species>
      <species id="M_fucgal14acglcgalgluside_hs_c" name="Lacto-N-fucopentaosyl III ceramide" compartment="c" hasOnlySubstanceUnits="false" boundaryCondition="false" constant="false">
        <notes>
          <body xmlns="http://www.w3.org/1999/xhtml">
            <p>FORMULA: C50H89N2O26FULLRCO</p>
            <p>CHARGE: 0</p>
          </body>
        </notes>
      </species>
      <species id="M_fucgal14acglcgalgluside_hs_e" name="Lacto-N-fucopentaosyl III ceramide" compartment="e" hasOnlySubstanceUnits="false" boundaryCondition="false" constant="false">
        <notes>
          <body xmlns="http://www.w3.org/1999/xhtml">
            <p>FORMULA: C50H89N2O26FULLRCO</p>
            <p>CHARGE: 0</p>
          </body>
        </notes>
      </species>
      <species id="M_fucgalacgalfuc12gal14acglcgalgluside_hs_c" name="Type IIIH glycolipid" compartment="c" hasOnlySubstanceUnits="false" boundaryCondition="false" constant="false">
        <notes>
          <body xmlns="http://www.w3.org/1999/xhtml">
            <p>FORMULA: C70H122N3O40FULLRCO</p>
            <p>CHARGE: 0</p>
          </body>
        </notes>
      </species>
      <species id="M_fucgalacgalfucgalacglcgal14acglcgalgluside_hs_c" name="(Gal)4 (GalNAc)1 (Glc)1 (GlcNAc)2 (LFuc)2 (Cer)1" compartment="c" hasOnlySubstanceUnits="false" boundaryCondition="false" constant="false">
        <notes>
          <body xmlns="http://www.w3.org/1999/xhtml">
            <p>FORMULA: C84H145N4O50FULLRCO</p>
            <p>CHARGE: 0</p>
          </body>
        </notes>
      </species>
      <species id="M_fucgalacglc13galacglcgal14acglcgalgluside_hs_c" name="(Gal)4 (Glc)1 (GlcNAc)3 (LFuc)1 (Cer)1" compartment="c" hasOnlySubstanceUnits="false" boundaryCondition="false" constant="false">
        <notes>
          <body xmlns="http://www.w3.org/1999/xhtml">
            <p>FORMULA: C78H135N4O46FULLRCO</p>
            <p>CHARGE: 0</p>
          </body>
        </notes>
      </species>
      <species id="M_fucgalacglcgal14acglcgalgluside_hs_c" name="VI2Fuc-nLc6" compartment="c" hasOnlySubstanceUnits="false" boundaryCondition="false" constant="false">
        <notes>
          <body xmlns="http://www.w3.org/1999/xhtml">
            <p>FORMULA: C64H112N3O36FULLRCO</p>
            <p>CHARGE: 0</p>
          </body>
        </notes>
      </species>
      <species id="M_fucgalacglcgalgluside_hs_c" name="Type IH glycolipid" compartment="c" hasOnlySubstanceUnits="false" boundaryCondition="false" constant="false">
        <notes>
          <body xmlns="http://www.w3.org/1999/xhtml">
            <p>FORMULA: C50H89N2O26FULLRCO</p>
            <p>CHARGE: 0</p>
          </body>
        </notes>
      </species>
      <species id="M_fucgalfucgalacglcgalgluside_hs_c" name="(Gal)3 (Glc)1 (GlcNAc)1 (LFuc)2 (Cer)1" compartment="c" hasOnlySubstanceUnits="false" boundaryCondition="false" constant="false">
        <notes>
          <body xmlns="http://www.w3.org/1999/xhtml">
            <p>FORMULA: C62H109N2O35FULLRCO</p>
            <p>CHARGE: 0</p>
          </body>
        </notes>
      </species>
      <species id="M_fucgalfucgalacglcgalgluside_hs_e" name="(Gal)3 (Glc)1 (GlcNAc)1 (LFuc)2 (Cer)1" compartment="e" hasOnlySubstanceUnits="false" boundaryCondition="false" constant="false">
        <notes>
          <body xmlns="http://www.w3.org/1999/xhtml">
            <p>FORMULA: C62H109N2O35FULLRCO</p>
            <p>CHARGE: 0</p>
          </body>
        </notes>
      </species>
      <species id="M_fucgalgbside_hs_c" name="fucosyl galactosylgloboside (homo sapiens)" compartment="c" hasOnlySubstanceUnits="false" boundaryCondition="false" constant="false">
        <notes>
          <body xmlns="http://www.w3.org/1999/xhtml">
            <p>FORMULA: C56H99N2O31FULLRCO</p>
            <p>CHARGE: 0</p>
          </body>
        </notes>
      </species>
      <species id="M_fucgalgbside_hs_e" name="fucosyl galactosylgloboside (homo sapiens)" compartment="e" hasOnlySubstanceUnits="false" boundaryCondition="false" constant="false">
        <notes>
          <body xmlns="http://www.w3.org/1999/xhtml">
            <p>FORMULA: C56H99N2O31FULLRCO</p>
            <p>CHARGE: 0</p>
          </body>
        </notes>
      </species>
      <species id="M_fum_c" name="Fumarate" compartment="c" hasOnlySubstanceUnits="false" boundaryCondition="false" constant="false">
        <notes>
          <body xmlns="http://www.w3.org/1999/xhtml">
            <p>FORMULA: C4H2O4</p>
            <p>CHARGE: 0</p>
          </body>
        </notes>
      </species>
      <species id="M_g1m6masnB1_c" name="glucosyl-(alpha-D-mannosyl)6-beta-D-mannosyl-diacetylchitobiosyl-L-asparagine (protein)" compartment="c" hasOnlySubstanceUnits="false" boundaryCondition="false" constant="false">
        <notes>
          <body xmlns="http://www.w3.org/1999/xhtml">
            <p>FORMULA: C64H107N2O50X</p>
            <p>CHARGE: 0</p>
          </body>
        </notes>
      </species>
      <species id="M_g1m7masnB_c" name="glucosyl-(alpha-D-mannosyl)7-beta-D-mannosyl-diacetylchitobiosyl-L-asparagine, isoform B (protein)" compartment="c" hasOnlySubstanceUnits="false" boundaryCondition="false" constant="false">
        <notes>
          <body xmlns="http://www.w3.org/1999/xhtml">
            <p>FORMULA: C70H117N2O55X</p>
            <p>CHARGE: 0</p>
          </body>
        </notes>
      </species>
      <species id="M_g1m7masnC_c" name="glucosyl-(alpha-D-mannosyl)7-beta-D-mannosyl-diacetylchitobiosyl-L-asparagine, isoform C (protein)" compartment="c" hasOnlySubstanceUnits="false" boundaryCondition="false" constant="false">
        <notes>
          <body xmlns="http://www.w3.org/1999/xhtml">
            <p>FORMULA: C70H117N2O55X</p>
            <p>CHARGE: 0</p>
          </body>
        </notes>
      </species>
      <species id="M_g1m8masn_c" name="(alpha-D-Glucosyl)-(alpha-D-mannosyl)8-beta-D-mannosyl-diacetylchitobiosyl-L-asparagine (protein)" compartment="c" hasOnlySubstanceUnits="false" boundaryCondition="false" constant="false">
        <notes>
          <body xmlns="http://www.w3.org/1999/xhtml">
            <p>FORMULA: C76H127N2O60X</p>
            <p>CHARGE: 0</p>
          </body>
        </notes>
      </species>
      <species id="M_g1m8mpdol_L_c" name="alpha-D-Glucosyl-(alpha-D-mannosyl)8-beta-D-mannosyl-diacetylchitobiosyldiphosphodolichol, human liver homolog" compartment="c" hasOnlySubstanceUnits="false" boundaryCondition="false" constant="false">
        <notes>
          <body xmlns="http://www.w3.org/1999/xhtml">
            <p>FORMULA: C1840H3028N20O670P20</p>
            <p>CHARGE: 0</p>
          </body>
        </notes>
      </species>
      <species id="M_g1m8mpdol_U_c" name="alpha-D-Glucosyl-(alpha-D-mannosyl)8-beta-D-mannosyl-diacetylchitobiosyldiphosphodolichol, human uterine homolog" compartment="c" hasOnlySubstanceUnits="false" boundaryCondition="false" constant="false">
        <notes>
          <body xmlns="http://www.w3.org/1999/xhtml">
            <p>FORMULA: C1785H2940N20O670P20</p>
            <p>CHARGE: 0</p>
          </body>
        </notes>
      </species>
      <species id="M_g1p_c" name="D-Glucose 1-phosphate" compartment="c" hasOnlySubstanceUnits="false" boundaryCondition="false" constant="false">
        <notes>
          <body xmlns="http://www.w3.org/1999/xhtml">
            <p>FORMULA: C6H11O9P</p>
            <p>CHARGE: 0</p>
          </body>
        </notes>
      </species>
      <species id="M_g2m8masn_c" name="(alpha-D-Glucosyl)2-(alpha-D-mannosyl)8-beta-D-mannosyl-diacetylchitobiosyl-L-asparagine (protein)" compartment="c" hasOnlySubstanceUnits="false" boundaryCondition="false" constant="false">
        <notes>
          <body xmlns="http://www.w3.org/1999/xhtml">
            <p>FORMULA: C82H137N2O65X</p>
            <p>CHARGE: 0</p>
          </body>
        </notes>
      </species>
      <species id="M_g2m8mpdol_L_c" name="(alpha-D-Glucosyl)2-(alpha-D-mannosyl)8-beta-D-mannosyl-diacetylchitobiosyldiphosphodolichol, human liver homolog" compartment="c" hasOnlySubstanceUnits="false" boundaryCondition="false" constant="false">
        <notes>
          <body xmlns="http://www.w3.org/1999/xhtml">
            <p>FORMULA: C1900H3128N20O720P20</p>
            <p>CHARGE: 0</p>
          </body>
        </notes>
      </species>
      <species id="M_g2m8mpdol_U_c" name="(alpha-D-Glucosyl)2-(alpha-D-mannosyl)8-beta-D-mannosyl-diacetylchitobiosyldiphosphodolichol, human uterine homolog" compartment="c" hasOnlySubstanceUnits="false" boundaryCondition="false" constant="false">
        <notes>
          <body xmlns="http://www.w3.org/1999/xhtml">
            <p>FORMULA: C1845H3040N20O720P20</p>
            <p>CHARGE: 0</p>
          </body>
        </notes>
      </species>
      <species id="M_g3m8masn_c" name="(alpha-D-Glucosyl)3-(alpha-D-mannosyl)8-beta-D-mannosyl-diacetylchitobiosyl-L-asparagine (protein)" compartment="c" hasOnlySubstanceUnits="false" boundaryCondition="false" constant="false">
        <notes>
          <body xmlns="http://www.w3.org/1999/xhtml">
            <p>FORMULA: C88H147N2O70X</p>
            <p>CHARGE: 0</p>
          </body>
        </notes>
      </species>
      <species id="M_g3m8mpdol_L_c" name="(alpha-D-Glucosyl)3-(alpha-D-mannosyl)8-beta-D-mannosyl-diacetylchitobiosyldiphosphodolichol, human liver homolog" compartment="c" hasOnlySubstanceUnits="false" boundaryCondition="false" constant="false">
        <notes>
          <body xmlns="http://www.w3.org/1999/xhtml">
            <p>FORMULA: C1960H3228N20O770P20</p>
            <p>CHARGE: 0</p>
          </body>
        </notes>
      </species>
      <species id="M_g3m8mpdol_U_c" name="(alpha-D-Glucosyl)3-(alpha-D-mannosyl)8-beta-D-mannosyl-diacetylchitobiosyldiphosphodolichol, human uterine homolog" compartment="c" hasOnlySubstanceUnits="false" boundaryCondition="false" constant="false">
        <notes>
          <body xmlns="http://www.w3.org/1999/xhtml">
            <p>FORMULA: C1905H3140N20O770P20</p>
            <p>CHARGE: 0</p>
          </body>
        </notes>
      </species>
      <species id="M_g3p_c" name="Glyceraldehyde 3-phosphate" compartment="c" hasOnlySubstanceUnits="false" boundaryCondition="false" constant="false">
        <notes>
          <body xmlns="http://www.w3.org/1999/xhtml">
            <p>FORMULA: C3H5O6P</p>
            <p>CHARGE: 0</p>
          </body>
        </notes>
      </species>
      <species id="M_g3pc_c" name="sn-Glycero-3-phosphocholine" compartment="c" hasOnlySubstanceUnits="false" boundaryCondition="false" constant="false">
        <notes>
          <body xmlns="http://www.w3.org/1999/xhtml">
            <p>FORMULA: C8H20NO6P</p>
            <p>CHARGE: 0</p>
          </body>
        </notes>
      </species>
      <species id="M_g6p_c" name="D-Glucose 6-phosphate" compartment="c" hasOnlySubstanceUnits="false" boundaryCondition="false" constant="false">
        <notes>
          <body xmlns="http://www.w3.org/1999/xhtml">
            <p>FORMULA: C6H11O9P</p>
            <p>CHARGE: 0</p>
          </body>
        </notes>
      </species>
      <species id="M_ga1_hs_c" name="GA1 (homo sapiens)" compartment="c" hasOnlySubstanceUnits="false" boundaryCondition="false" constant="false">
        <notes>
          <body xmlns="http://www.w3.org/1999/xhtml">
            <p>FORMULA: C44H79N2O22FULLRCO</p>
            <p>CHARGE: 0</p>
          </body>
        </notes>
      </species>
      <species id="M_ga2_hs_c" name="GA2 (homo sapiens)" compartment="c" hasOnlySubstanceUnits="false" boundaryCondition="false" constant="false">
        <notes>
          <body xmlns="http://www.w3.org/1999/xhtml">
            <p>FORMULA: C38H69N2O17FULLRCO</p>
            <p>CHARGE: 0</p>
          </body>
        </notes>
      </species>
      <species id="M_gacpail_hs_c" name="glucosaminyl-acylphosphatidylinositol" compartment="c" hasOnlySubstanceUnits="false" boundaryCondition="false" constant="false">
        <notes>
          <body xmlns="http://www.w3.org/1999/xhtml">
            <p>FORMULA: C31H58NO14PFULLRCO2FULLR2CO2</p>
            <p>CHARGE: 0</p>
          </body>
        </notes>
      </species>
      <species id="M_gal14acglcgalgluside_hs_c" name="Lactoneotetraosylceramide" compartment="c" hasOnlySubstanceUnits="false" boundaryCondition="false" constant="false">
        <notes>
          <body xmlns="http://www.w3.org/1999/xhtml">
            <p>FORMULA: C44H79N2O22FULLRCO</p>
            <p>CHARGE: 0</p>
          </body>
        </notes>
      </species>
      <species id="M_gal1p_c" name="alpha-D-Galactose 1-phosphate" compartment="c" hasOnlySubstanceUnits="false" boundaryCondition="false" constant="false">
        <notes>
          <body xmlns="http://www.w3.org/1999/xhtml">
            <p>FORMULA: C6H11O9P</p>
            <p>CHARGE: 0</p>
          </body>
        </notes>
      </species>
      <species id="M_gal_c" name="D-Galactose" compartment="c" hasOnlySubstanceUnits="false" boundaryCondition="false" constant="false">
        <notes>
          <body xmlns="http://www.w3.org/1999/xhtml">
            <p>FORMULA: C6H12O6</p>
            <p>CHARGE: 0</p>
          </body>
        </notes>
      </species>
      <species id="M_gal_e" name="D-Galactose" compartment="e" hasOnlySubstanceUnits="false" boundaryCondition="false" constant="false">
        <notes>
          <body xmlns="http://www.w3.org/1999/xhtml">
            <p>FORMULA: C6H12O6</p>
            <p>CHARGE: 0</p>
          </body>
        </notes>
      </species>
      <species id="M_galacgalfuc12gal14acglcgalgluside_hs_c" name="(Gal)3 (GalNAc)1 (Glc)1 (GlcNAc)1 (LFuc)1 (Cer)1" compartment="c" hasOnlySubstanceUnits="false" boundaryCondition="false" constant="false">
        <notes>
          <body xmlns="http://www.w3.org/1999/xhtml">
            <p>FORMULA: C64H112N3O36FULLRCO</p>
            <p>CHARGE: 0</p>
          </body>
        </notes>
      </species>
      <species id="M_galacgalfucgalacglcgal14acglcgalgluside_hs_c" name="(Gal)4 (GalNAc)1 (Glc)1 (GlcNAc)2 (LFuc)1 (Cer)1" compartment="c" hasOnlySubstanceUnits="false" boundaryCondition="false" constant="false">
        <notes>
          <body xmlns="http://www.w3.org/1999/xhtml">
            <p>FORMULA: C78H135N4O46FULLRCO</p>
            <p>CHARGE: 0</p>
          </body>
        </notes>
      </species>
      <species id="M_galacglc13galacglcgal14acglcgalgluside_hs_c" name="nLc8Cer" compartment="c" hasOnlySubstanceUnits="false" boundaryCondition="false" constant="false">
        <notes>
          <body xmlns="http://www.w3.org/1999/xhtml">
            <p>FORMULA: C72H125N4O42FULLRCO</p>
            <p>CHARGE: 0</p>
          </body>
        </notes>
      </species>
      <species id="M_galacglcgal14acglcgalgluside_hs_c" name="i-antigen" compartment="c" hasOnlySubstanceUnits="false" boundaryCondition="false" constant="false">
        <notes>
          <body xmlns="http://www.w3.org/1999/xhtml">
            <p>FORMULA: C58H102N3O32FULLRCO</p>
            <p>CHARGE: 0</p>
          </body>
        </notes>
      </species>
      <species id="M_galacglcgalacglcgal14acglcgalgluside_hs_c" name="I-antigen" compartment="c" hasOnlySubstanceUnits="false" boundaryCondition="false" constant="false">
        <notes>
          <body xmlns="http://www.w3.org/1999/xhtml">
            <p>FORMULA: C72H125N4O42FULLRCO</p>
            <p>CHARGE: 0</p>
          </body>
        </notes>
      </species>
      <species id="M_galacglcgalgbside_hs_c" name="Gal-GlcNAc-Gal globoside (homo sapiens)" compartment="c" hasOnlySubstanceUnits="false" boundaryCondition="false" constant="false">
        <notes>
          <body xmlns="http://www.w3.org/1999/xhtml">
            <p>FORMULA: C64H112N3O37FULLRCO</p>
            <p>CHARGE: 0</p>
          </body>
        </notes>
      </species>
      <species id="M_galacglcgalgbside_hs_e" name="Gal-GlcNAc-Gal globoside (homo sapiens)" compartment="e" hasOnlySubstanceUnits="false" boundaryCondition="false" constant="false">
        <notes>
          <body xmlns="http://www.w3.org/1999/xhtml">
            <p>FORMULA: C64H112N3O37FULLRCO</p>
            <p>CHARGE: 0</p>
          </body>
        </notes>
      </species>
      <species id="M_galacglcgalgluside_hs_c" name="Lc4Cer" compartment="c" hasOnlySubstanceUnits="false" boundaryCondition="false" constant="false">
        <notes>
          <body xmlns="http://www.w3.org/1999/xhtml">
            <p>FORMULA: C44H79N2O22FULLRCO</p>
            <p>CHARGE: 0</p>
          </body>
        </notes>
      </species>
      <species id="M_galfuc12gal14acglcgalgluside_hs_c" name="(Gal)3 (Glc)1 (GlcNAc)1 (LFuc)1 (Cer)1" compartment="c" hasOnlySubstanceUnits="false" boundaryCondition="false" constant="false">
        <notes>
          <body xmlns="http://www.w3.org/1999/xhtml">
            <p>FORMULA: C56H99N2O31FULLRCO</p>
            <p>CHARGE: 0</p>
          </body>
        </notes>
      </species>
      <species id="M_galfuc12gal14acglcgalgluside_hs_e" name="(Gal)3 (Glc)1 (GlcNAc)1 (LFuc)1 (Cer)1" compartment="e" hasOnlySubstanceUnits="false" boundaryCondition="false" constant="false">
        <notes>
          <body xmlns="http://www.w3.org/1999/xhtml">
            <p>FORMULA: C56H99N2O31FULLRCO</p>
            <p>CHARGE: 0</p>
          </body>
        </notes>
      </species>
      <species id="M_galfucgalacglcgal14acglcgalgluside_hs_c" name="(Gal)4 (Glc)1 (GlcNAc)2 (LFuc)1 (Cer)1" compartment="c" hasOnlySubstanceUnits="false" boundaryCondition="false" constant="false">
        <notes>
          <body xmlns="http://www.w3.org/1999/xhtml">
            <p>FORMULA: C70H122N3O41FULLRCO</p>
            <p>CHARGE: 0</p>
          </body>
        </notes>
      </species>
      <species id="M_galfucgalacglcgal14acglcgalgluside_hs_e" name="(Gal)4 (Glc)1 (GlcNAc)2 (LFuc)1 (Cer)1" compartment="e" hasOnlySubstanceUnits="false" boundaryCondition="false" constant="false">
        <notes>
          <body xmlns="http://www.w3.org/1999/xhtml">
            <p>FORMULA: C70H122N3O41FULLRCO</p>
            <p>CHARGE: 0</p>
          </body>
        </notes>
      </species>
      <species id="M_galfucgalacglcgalgluside_hs_c" name="Type IB glycolipid" compartment="c" hasOnlySubstanceUnits="false" boundaryCondition="false" constant="false">
        <notes>
          <body xmlns="http://www.w3.org/1999/xhtml">
            <p>FORMULA: C56H99N2O31FULLRCO</p>
            <p>CHARGE: 0</p>
          </body>
        </notes>
      </species>
      <species id="M_galgalfucfucgalacglcgalacglcgal14acglcgalgluside_hs_c" name="(Gal)6 (Glc)1 (GlcNAc)3 (LFuc)2 (Cer)1" compartment="c" hasOnlySubstanceUnits="false" boundaryCondition="false" constant="false">
        <notes>
          <body xmlns="http://www.w3.org/1999/xhtml">
            <p>FORMULA: C96H165N4O60FULLRCO</p>
            <p>CHARGE: 0</p>
          </body>
        </notes>
      </species>
      <species id="M_galgalfucfucgalacglcgalacglcgal14acglcgalgluside_hs_e" name="(Gal)6 (Glc)1 (GlcNAc)3 (LFuc)2 (Cer)1" compartment="e" hasOnlySubstanceUnits="false" boundaryCondition="false" constant="false">
        <notes>
          <body xmlns="http://www.w3.org/1999/xhtml">
            <p>FORMULA: C96H165N4O60FULLRCO</p>
            <p>CHARGE: 0</p>
          </body>
        </notes>
      </species>
      <species id="M_galgalgalthcrm_hs_c" name="Gal-Gal-Gal-Gal-Gal-Glc-Cer (homo sapiens)" compartment="c" hasOnlySubstanceUnits="false" boundaryCondition="false" constant="false">
        <notes>
          <body xmlns="http://www.w3.org/1999/xhtml">
            <p>FORMULA: C54H96NO32FULLRCO</p>
            <p>CHARGE: 0</p>
          </body>
        </notes>
      </species>
      <species id="M_galgalgalthcrm_hs_e" name="Gal-Gal-Gal-Gal-Gal-Glc-Cer (homo sapiens)" compartment="e" hasOnlySubstanceUnits="false" boundaryCondition="false" constant="false">
        <notes>
          <body xmlns="http://www.w3.org/1999/xhtml">
            <p>FORMULA: C54H96NO32FULLRCO</p>
            <p>CHARGE: 0</p>
          </body>
        </notes>
      </species>
      <species id="M_galgalthcrm_hs_c" name="Gal-Gal-Gal-Gal-Glc-Cer (homo sapiens)" compartment="c" hasOnlySubstanceUnits="false" boundaryCondition="false" constant="false">
        <notes>
          <body xmlns="http://www.w3.org/1999/xhtml">
            <p>FORMULA: C48H86NO27FULLRCO</p>
            <p>CHARGE: 0</p>
          </body>
        </notes>
      </species>
      <species id="M_galgbside_hs_c" name="galactosylgloboside (homo sapiens)" compartment="c" hasOnlySubstanceUnits="false" boundaryCondition="false" constant="false">
        <notes>
          <body xmlns="http://www.w3.org/1999/xhtml">
            <p>FORMULA: C50H89N2O27FULLRCO</p>
            <p>CHARGE: 0</p>
          </body>
        </notes>
      </species>
      <species id="M_galgluside_hs_c" name="galactosyl glucosyl ceramide" compartment="c" hasOnlySubstanceUnits="false" boundaryCondition="false" constant="false">
        <notes>
          <body xmlns="http://www.w3.org/1999/xhtml">
            <p>FORMULA: C30H56NO12FULLRCO</p>
            <p>CHARGE: 0</p>
          </body>
        </notes>
      </species>
      <species id="M_galside_hs_c" name="galactocerebroside (homo sapiens)" compartment="c" hasOnlySubstanceUnits="false" boundaryCondition="false" constant="false">
        <notes>
          <body xmlns="http://www.w3.org/1999/xhtml">
            <p>FORMULA: C24H46NO7FULLRCO</p>
            <p>CHARGE: 0</p>
          </body>
        </notes>
      </species>
      <species id="M_galt_c" name="Galactitol" compartment="c" hasOnlySubstanceUnits="false" boundaryCondition="false" constant="false">
        <notes>
          <body xmlns="http://www.w3.org/1999/xhtml">
            <p>FORMULA: C6H14O6</p>
            <p>CHARGE: 0</p>
          </body>
        </notes>
      </species>
      <species id="M_galthcrm_hs_c" name="Gal-Gal-Gal-Glc-Cer (homo sapiens)" compartment="c" hasOnlySubstanceUnits="false" boundaryCondition="false" constant="false">
        <notes>
          <body xmlns="http://www.w3.org/1999/xhtml">
            <p>FORMULA: C42H76NO22FULLRCO</p>
            <p>CHARGE: 0</p>
          </body>
        </notes>
      </species>
      <species id="M_gam6p_c" name="D-Glucosamine 6-phosphate" compartment="c" hasOnlySubstanceUnits="false" boundaryCondition="false" constant="false">
        <notes>
          <body xmlns="http://www.w3.org/1999/xhtml">
            <p>FORMULA: C6H13NO8P</p>
            <p>CHARGE: 0</p>
          </body>
        </notes>
      </species>
      <species id="M_gam_c" name="D-Glucosamine" compartment="c" hasOnlySubstanceUnits="false" boundaryCondition="false" constant="false">
        <notes>
          <body xmlns="http://www.w3.org/1999/xhtml">
            <p>FORMULA: C6H14NO5</p>
            <p>CHARGE: 0</p>
          </body>
        </notes>
      </species>
      <species id="M_gam_e" name="D-Glucosamine" compartment="e" hasOnlySubstanceUnits="false" boundaryCondition="false" constant="false">
        <notes>
          <body xmlns="http://www.w3.org/1999/xhtml">
            <p>FORMULA: C6H14NO5</p>
            <p>CHARGE: 0</p>
          </body>
        </notes>
      </species>
      <species id="M_gar_c" name="N1-(5-Phospho-D-ribosyl)glycinamide" compartment="c" hasOnlySubstanceUnits="false" boundaryCondition="false" constant="false">
        <notes>
          <body xmlns="http://www.w3.org/1999/xhtml">
            <p>FORMULA: C7H14N2O8P</p>
            <p>CHARGE: 0</p>
          </body>
        </notes>
      </species>
      <species id="M_gbside_hs_c" name="globoside (homo sapiens)" compartment="c" hasOnlySubstanceUnits="false" boundaryCondition="false" constant="false">
        <notes>
          <body xmlns="http://www.w3.org/1999/xhtml">
            <p>FORMULA: C44H79N2O22FULLRCO</p>
            <p>CHARGE: 0</p>
          </body>
        </notes>
      </species>
      <species id="M_gbside_hs_e" name="globoside (homo sapiens)" compartment="e" hasOnlySubstanceUnits="false" boundaryCondition="false" constant="false">
        <notes>
          <body xmlns="http://www.w3.org/1999/xhtml">
            <p>FORMULA: C44H79N2O22FULLRCO</p>
            <p>CHARGE: 0</p>
          </body>
        </notes>
      </species>
      <species id="M_gcald_c" name="Glycolaldehyde" compartment="c" hasOnlySubstanceUnits="false" boundaryCondition="false" constant="false">
        <notes>
          <body xmlns="http://www.w3.org/1999/xhtml">
            <p>FORMULA: C2H4O2</p>
            <p>CHARGE: 0</p>
          </body>
        </notes>
      </species>
      <species id="M_gchola_c" name="glycocholate" compartment="c" hasOnlySubstanceUnits="false" boundaryCondition="false" constant="false">
        <notes>
          <body xmlns="http://www.w3.org/1999/xhtml">
            <p>FORMULA: C26H43NO6</p>
            <p>CHARGE: 0</p>
          </body>
        </notes>
      </species>
      <species id="M_gchola_e" name="glycocholate" compartment="e" hasOnlySubstanceUnits="false" boundaryCondition="false" constant="false">
        <notes>
          <body xmlns="http://www.w3.org/1999/xhtml">
            <p>FORMULA: C26H43NO6</p>
            <p>CHARGE: 0</p>
          </body>
        </notes>
      </species>
      <species id="M_gd1a_hs_c" name="GD1a (homo sapiens)" compartment="c" hasOnlySubstanceUnits="false" boundaryCondition="false" constant="false">
        <notes>
          <body xmlns="http://www.w3.org/1999/xhtml">
            <p>FORMULA: C66H111N4O38FULLRCO</p>
            <p>CHARGE: 0</p>
          </body>
        </notes>
      </species>
      <species id="M_gd1alpha_hs_c" name="GD1a (homo sapiens)" compartment="c" hasOnlySubstanceUnits="false" boundaryCondition="false" constant="false">
        <notes>
          <body xmlns="http://www.w3.org/1999/xhtml">
            <p>FORMULA: C66H111N4O38FULLRCO</p>
            <p>CHARGE: 0</p>
          </body>
        </notes>
      </species>
      <species id="M_gd1b2_hs_c" name="GD1beta (homo sapiens)" compartment="c" hasOnlySubstanceUnits="false" boundaryCondition="false" constant="false">
        <notes>
          <body xmlns="http://www.w3.org/1999/xhtml">
            <p>FORMULA: C66H111N4O38FULLRCO</p>
            <p>CHARGE: 0</p>
          </body>
        </notes>
      </species>
      <species id="M_gd1b2_hs_e" name="GD1beta (homo sapiens)" compartment="e" hasOnlySubstanceUnits="false" boundaryCondition="false" constant="false">
        <notes>
          <body xmlns="http://www.w3.org/1999/xhtml">
            <p>FORMULA: C66H111N4O38FULLRCO</p>
            <p>CHARGE: 0</p>
          </body>
        </notes>
      </species>
      <species id="M_gd1b_hs_c" name="GD1b (homo sapiens)" compartment="c" hasOnlySubstanceUnits="false" boundaryCondition="false" constant="false">
        <notes>
          <body xmlns="http://www.w3.org/1999/xhtml">
            <p>FORMULA: C66H111N4O38FULLRCO</p>
            <p>CHARGE: 0</p>
          </body>
        </notes>
      </species>
      <species id="M_gd1c_hs_c" name="GD1c (homo sapiens)" compartment="c" hasOnlySubstanceUnits="false" boundaryCondition="false" constant="false">
        <notes>
          <body xmlns="http://www.w3.org/1999/xhtml">
            <p>FORMULA: C66H111N4O38FULLRCO</p>
            <p>CHARGE: 0</p>
          </body>
        </notes>
      </species>
      <species id="M_gd1c_hs_e" name="GD1c (homo sapiens)" compartment="e" hasOnlySubstanceUnits="false" boundaryCondition="false" constant="false">
        <notes>
          <body xmlns="http://www.w3.org/1999/xhtml">
            <p>FORMULA: C66H111N4O38FULLRCO</p>
            <p>CHARGE: 0</p>
          </body>
        </notes>
      </species>
      <species id="M_gd2_hs_c" name="GD2 (homo sapiens)" compartment="c" hasOnlySubstanceUnits="false" boundaryCondition="false" constant="false">
        <notes>
          <body xmlns="http://www.w3.org/1999/xhtml">
            <p>FORMULA: C60H101N4O33FULLRCO</p>
            <p>CHARGE: 0</p>
          </body>
        </notes>
      </species>
      <species id="M_gd3_hs_c" name="GD3 (homo sapiens)" compartment="c" hasOnlySubstanceUnits="false" boundaryCondition="false" constant="false">
        <notes>
          <body xmlns="http://www.w3.org/1999/xhtml">
            <p>FORMULA: C52H88N3O28FULLRCO</p>
            <p>CHARGE: 0</p>
          </body>
        </notes>
      </species>
      <species id="M_gdchola_c" name="glycochenodeoxycholate" compartment="c" hasOnlySubstanceUnits="false" boundaryCondition="false" constant="false">
        <notes>
          <body xmlns="http://www.w3.org/1999/xhtml">
            <p>FORMULA: C26H43NO5</p>
            <p>CHARGE: 0</p>
          </body>
        </notes>
      </species>
      <species id="M_gdchola_e" name="glycochenodeoxycholate" compartment="e" hasOnlySubstanceUnits="false" boundaryCondition="false" constant="false">
        <notes>
          <body xmlns="http://www.w3.org/1999/xhtml">
            <p>FORMULA: C26H43NO5</p>
            <p>CHARGE: 0</p>
          </body>
        </notes>
      </species>
      <species id="M_gdp_c" name="GDP" compartment="c" hasOnlySubstanceUnits="false" boundaryCondition="false" constant="false">
        <notes>
          <body xmlns="http://www.w3.org/1999/xhtml">
            <p>FORMULA: C10H12N5O11P2</p>
            <p>CHARGE: 0</p>
          </body>
        </notes>
      </species>
      <species id="M_gdp_e" name="GDP" compartment="e" hasOnlySubstanceUnits="false" boundaryCondition="false" constant="false">
        <notes>
          <body xmlns="http://www.w3.org/1999/xhtml">
            <p>FORMULA: C10H12N5O11P2</p>
            <p>CHARGE: 0</p>
          </body>
        </notes>
      </species>
      <species id="M_gdpddman_c" name="GDP-4-dehydro-6-deoxy-D-mannose" compartment="c" hasOnlySubstanceUnits="false" boundaryCondition="false" constant="false">
        <notes>
          <body xmlns="http://www.w3.org/1999/xhtml">
            <p>FORMULA: C16H21N5O15P2</p>
            <p>CHARGE: 0</p>
          </body>
        </notes>
      </species>
      <species id="M_gdpfuc_c" name="GDP-L-fucose" compartment="c" hasOnlySubstanceUnits="false" boundaryCondition="false" constant="false">
        <notes>
          <body xmlns="http://www.w3.org/1999/xhtml">
            <p>FORMULA: C16H23N5O15P2</p>
            <p>CHARGE: 0</p>
          </body>
        </notes>
      </species>
      <species id="M_gdpmann_c" name="GDP-D-mannose" compartment="c" hasOnlySubstanceUnits="false" boundaryCondition="false" constant="false">
        <notes>
          <body xmlns="http://www.w3.org/1999/xhtml">
            <p>FORMULA: C16H23N5O16P2</p>
            <p>CHARGE: 0</p>
          </body>
        </notes>
      </species>
      <species id="M_ggdp_c" name="Geranylgeranyl diphosphate" compartment="c" hasOnlySubstanceUnits="false" boundaryCondition="false" constant="false">
        <notes>
          <body xmlns="http://www.w3.org/1999/xhtml">
            <p>FORMULA: C20H33O7P2</p>
            <p>CHARGE: 0</p>
          </body>
        </notes>
      </species>
      <species id="M_ggn_c" name="primed glycogenin (glycogenin-8[1,4-Glc])" compartment="c" hasOnlySubstanceUnits="false" boundaryCondition="false" constant="false">
        <notes>
          <body xmlns="http://www.w3.org/1999/xhtml">
            <p>FORMULA: C48H81O41X</p>
            <p>CHARGE: 0</p>
          </body>
        </notes>
      </species>
      <species id="M_glac_c" name="D-glucurono-6,3-lactone" compartment="c" hasOnlySubstanceUnits="false" boundaryCondition="false" constant="false">
        <notes>
          <body xmlns="http://www.w3.org/1999/xhtml">
            <p>FORMULA: C6H8O6</p>
            <p>CHARGE: 0</p>
          </body>
        </notes>
      </species>
      <species id="M_glc1man_c" name="glucose-1,3-mannose oligosaccharide" compartment="c" hasOnlySubstanceUnits="false" boundaryCondition="false" constant="false">
        <notes>
          <body xmlns="http://www.w3.org/1999/xhtml">
            <p>FORMULA: C12H22O11</p>
            <p>CHARGE: 0</p>
          </body>
        </notes>
      </species>
      <species id="M_glc2man_c" name="(2)[glucose-1,3]-mannose oligosaccharide" compartment="c" hasOnlySubstanceUnits="false" boundaryCondition="false" constant="false">
        <notes>
          <body xmlns="http://www.w3.org/1999/xhtml">
            <p>FORMULA: C18H32O16</p>
            <p>CHARGE: 0</p>
          </body>
        </notes>
      </species>
      <species id="M_glc3man_c" name="glucose-1,2-(2)[glucose-1,3]-mannose oligosaccharide" compartment="c" hasOnlySubstanceUnits="false" boundaryCondition="false" constant="false">
        <notes>
          <body xmlns="http://www.w3.org/1999/xhtml">
            <p>FORMULA: C24H42O21</p>
            <p>CHARGE: 0</p>
          </body>
        </notes>
      </species>
      <species id="M_glc_DASH_D_c" name="D-Glucose" compartment="c" hasOnlySubstanceUnits="false" boundaryCondition="false" constant="false">
        <notes>
          <body xmlns="http://www.w3.org/1999/xhtml">
            <p>FORMULA: C6H12O6</p>
            <p>CHARGE: 0</p>
          </body>
        </notes>
      </species>
      <species id="M_glc_DASH_D_e" name="D-Glucose" compartment="e" hasOnlySubstanceUnits="false" boundaryCondition="false" constant="false">
        <notes>
          <body xmlns="http://www.w3.org/1999/xhtml">
            <p>FORMULA: C6H12O6</p>
            <p>CHARGE: 0</p>
          </body>
        </notes>
      </species>
      <species id="M_glcr_c" name="D-Glucarate" compartment="c" hasOnlySubstanceUnits="false" boundaryCondition="false" constant="false">
        <notes>
          <body xmlns="http://www.w3.org/1999/xhtml">
            <p>FORMULA: C6H8O8</p>
            <p>CHARGE: 0</p>
          </body>
        </notes>
      </species>
      <species id="M_glcur1p_c" name="D-Glucuronate 1-phosphate" compartment="c" hasOnlySubstanceUnits="false" boundaryCondition="false" constant="false">
        <notes>
          <body xmlns="http://www.w3.org/1999/xhtml">
            <p>FORMULA: C6H8O10P</p>
            <p>CHARGE: 0</p>
          </body>
        </notes>
      </species>
      <species id="M_glcur_c" name="D-Glucuronate" compartment="c" hasOnlySubstanceUnits="false" boundaryCondition="false" constant="false">
        <notes>
          <body xmlns="http://www.w3.org/1999/xhtml">
            <p>FORMULA: C6H9O7</p>
            <p>CHARGE: 0</p>
          </body>
        </notes>
      </species>
      <species id="M_gln_DASH_L_c" name="L-Glutamine" compartment="c" hasOnlySubstanceUnits="false" boundaryCondition="false" constant="false">
        <notes>
          <body xmlns="http://www.w3.org/1999/xhtml">
            <p>FORMULA: C5H10N2O3</p>
            <p>CHARGE: 0</p>
          </body>
        </notes>
      </species>
      <species id="M_gln_DASH_L_e" name="L-Glutamine" compartment="e" hasOnlySubstanceUnits="false" boundaryCondition="false" constant="false">
        <notes>
          <body xmlns="http://www.w3.org/1999/xhtml">
            <p>FORMULA: C5H10N2O3</p>
            <p>CHARGE: 0</p>
          </body>
        </notes>
      </species>
      <species id="M_glu5p_c" name="L-Glutamate 5-phosphate" compartment="c" hasOnlySubstanceUnits="false" boundaryCondition="false" constant="false">
        <notes>
          <body xmlns="http://www.w3.org/1999/xhtml">
            <p>FORMULA: C5H8NO7P</p>
            <p>CHARGE: 0</p>
          </body>
        </notes>
      </species>
      <species id="M_glu5sa_c" name="L-Glutamate 5-semialdehyde" compartment="c" hasOnlySubstanceUnits="false" boundaryCondition="false" constant="false">
        <notes>
          <body xmlns="http://www.w3.org/1999/xhtml">
            <p>FORMULA: C5H9NO3</p>
            <p>CHARGE: 0</p>
          </body>
        </notes>
      </species>
      <species id="M_glu_DASH_L_c" name="L-Glutamate" compartment="c" hasOnlySubstanceUnits="false" boundaryCondition="false" constant="false">
        <notes>
          <body xmlns="http://www.w3.org/1999/xhtml">
            <p>FORMULA: C5H8NO4</p>
            <p>CHARGE: 0</p>
          </body>
        </notes>
      </species>
      <species id="M_glu_DASH_L_e" name="L-Glutamate" compartment="e" hasOnlySubstanceUnits="false" boundaryCondition="false" constant="false">
        <notes>
          <body xmlns="http://www.w3.org/1999/xhtml">
            <p>FORMULA: C5H8NO4</p>
            <p>CHARGE: 0</p>
          </body>
        </notes>
      </species>
      <species id="M_gluala_e" name="5-L-Glutamyl-L-alanine" compartment="e" hasOnlySubstanceUnits="false" boundaryCondition="false" constant="false">
        <notes>
          <body xmlns="http://www.w3.org/1999/xhtml">
            <p>FORMULA: C8H13N2O5</p>
            <p>CHARGE: 0</p>
          </body>
        </notes>
      </species>
      <species id="M_glucys_c" name="gamma-L-Glutamyl-L-cysteine" compartment="c" hasOnlySubstanceUnits="false" boundaryCondition="false" constant="false">
        <notes>
          <body xmlns="http://www.w3.org/1999/xhtml">
            <p>FORMULA: C8H13N2O5S</p>
            <p>CHARGE: 0</p>
          </body>
        </notes>
      </species>
      <species id="M_gluside_hs_c" name="glucocerebroside (homo sapiens)" compartment="c" hasOnlySubstanceUnits="false" boundaryCondition="false" constant="false">
        <notes>
          <body xmlns="http://www.w3.org/1999/xhtml">
            <p>FORMULA: C24H46NO7FULLRCO</p>
            <p>CHARGE: 0</p>
          </body>
        </notes>
      </species>
      <species id="M_glutcoa_c" name="Glutaryl-CoA" compartment="c" hasOnlySubstanceUnits="false" boundaryCondition="false" constant="false">
        <notes>
          <body xmlns="http://www.w3.org/1999/xhtml">
            <p>FORMULA: C26H37N7O19P3S</p>
            <p>CHARGE: 0</p>
          </body>
        </notes>
      </species>
      <species id="M_glx_c" name="Glyoxylate" compartment="c" hasOnlySubstanceUnits="false" boundaryCondition="false" constant="false">
        <notes>
          <body xmlns="http://www.w3.org/1999/xhtml">
            <p>FORMULA: C2H1O3</p>
            <p>CHARGE: 0</p>
          </body>
        </notes>
      </species>
      <species id="M_gly_c" name="Glycine" compartment="c" hasOnlySubstanceUnits="false" boundaryCondition="false" constant="false">
        <notes>
          <body xmlns="http://www.w3.org/1999/xhtml">
            <p>FORMULA: C2H5NO2</p>
            <p>CHARGE: 0</p>
          </body>
        </notes>
      </species>
      <species id="M_gly_e" name="Glycine" compartment="e" hasOnlySubstanceUnits="false" boundaryCondition="false" constant="false">
        <notes>
          <body xmlns="http://www.w3.org/1999/xhtml">
            <p>FORMULA: C2H5NO2</p>
            <p>CHARGE: 0</p>
          </body>
        </notes>
      </species>
      <species id="M_glyald_c" name="D-Glyceraldehyde" compartment="c" hasOnlySubstanceUnits="false" boundaryCondition="false" constant="false">
        <notes>
          <body xmlns="http://www.w3.org/1999/xhtml">
            <p>FORMULA: C3H6O3</p>
            <p>CHARGE: 0</p>
          </body>
        </notes>
      </species>
      <species id="M_glyb_c" name="Glycine betaine" compartment="c" hasOnlySubstanceUnits="false" boundaryCondition="false" constant="false">
        <notes>
          <body xmlns="http://www.w3.org/1999/xhtml">
            <p>FORMULA: C5H11NO2</p>
            <p>CHARGE: 0</p>
          </body>
        </notes>
      </species>
      <species id="M_glyb_e" name="Glycine betaine" compartment="e" hasOnlySubstanceUnits="false" boundaryCondition="false" constant="false">
        <notes>
          <body xmlns="http://www.w3.org/1999/xhtml">
            <p>FORMULA: C5H11NO2</p>
            <p>CHARGE: 0</p>
          </body>
        </notes>
      </species>
      <species id="M_glyc3p_c" name="Glycerol 3-phosphate" compartment="c" hasOnlySubstanceUnits="false" boundaryCondition="false" constant="false">
        <notes>
          <body xmlns="http://www.w3.org/1999/xhtml">
            <p>FORMULA: C3H7O6P</p>
            <p>CHARGE: 0</p>
          </body>
        </notes>
      </species>
      <species id="M_glyc_DASH_R_c" name="(R)-Glycerate" compartment="c" hasOnlySubstanceUnits="false" boundaryCondition="false" constant="false">
        <notes>
          <body xmlns="http://www.w3.org/1999/xhtml">
            <p>FORMULA: C3H5O4</p>
            <p>CHARGE: 0</p>
          </body>
        </notes>
      </species>
      <species id="M_glyc_DASH_S_c" name="(S)-Glycerate" compartment="c" hasOnlySubstanceUnits="false" boundaryCondition="false" constant="false">
        <notes>
          <body xmlns="http://www.w3.org/1999/xhtml">
            <p>FORMULA: C3H5O4</p>
            <p>CHARGE: 0</p>
          </body>
        </notes>
      </species>
      <species id="M_glyc_DASH_S_e" name="(S)-Glycerate" compartment="e" hasOnlySubstanceUnits="false" boundaryCondition="false" constant="false">
        <notes>
          <body xmlns="http://www.w3.org/1999/xhtml">
            <p>FORMULA: C3H5O4</p>
            <p>CHARGE: 0</p>
          </body>
        </notes>
      </species>
      <species id="M_glyc_c" name="Glycerol" compartment="c" hasOnlySubstanceUnits="false" boundaryCondition="false" constant="false">
        <notes>
          <body xmlns="http://www.w3.org/1999/xhtml">
            <p>FORMULA: C3H8O3</p>
            <p>CHARGE: 0</p>
          </body>
        </notes>
      </species>
      <species id="M_glyc_e" name="Glycerol" compartment="e" hasOnlySubstanceUnits="false" boundaryCondition="false" constant="false">
        <notes>
          <body xmlns="http://www.w3.org/1999/xhtml">
            <p>FORMULA: C3H8O3</p>
            <p>CHARGE: 0</p>
          </body>
        </notes>
      </species>
      <species id="M_glyclt_c" name="Glycolate" compartment="c" hasOnlySubstanceUnits="false" boundaryCondition="false" constant="false">
        <notes>
          <body xmlns="http://www.w3.org/1999/xhtml">
            <p>FORMULA: C2H3O3</p>
            <p>CHARGE: 0</p>
          </body>
        </notes>
      </species>
      <species id="M_glygn1_c" name="glycogen, structure 1 (glycogenin-11[1,4-Glc])" compartment="c" hasOnlySubstanceUnits="false" boundaryCondition="false" constant="false">
        <notes>
          <body xmlns="http://www.w3.org/1999/xhtml">
            <p>FORMULA: C66H111O56X</p>
            <p>CHARGE: 0</p>
          </body>
        </notes>
      </species>
      <species id="M_glygn2_c" name="glycogen, structure 2 (glycogenin-1,6-{7[1,4-Glc], 4[1,4-Glc]})" compartment="c" hasOnlySubstanceUnits="false" boundaryCondition="false" constant="false">
        <notes>
          <body xmlns="http://www.w3.org/1999/xhtml">
            <p>FORMULA: C66H111O56X</p>
            <p>CHARGE: 0</p>
          </body>
        </notes>
      </species>
      <species id="M_glygn2_e" name="glycogen, structure 2 (glycogenin-1,6-{7[1,4-Glc], 4[1,4-Glc]})" compartment="e" hasOnlySubstanceUnits="false" boundaryCondition="false" constant="false">
        <notes>
          <body xmlns="http://www.w3.org/1999/xhtml">
            <p>FORMULA: C66H111O56X</p>
            <p>CHARGE: 0</p>
          </body>
        </notes>
      </species>
      <species id="M_glygn3_c" name="glycogen, structure 3 (glycogenin-7[1,4-Glc])" compartment="c" hasOnlySubstanceUnits="false" boundaryCondition="false" constant="false">
        <notes>
          <body xmlns="http://www.w3.org/1999/xhtml">
            <p>FORMULA: C42H71O36X</p>
            <p>CHARGE: 0</p>
          </body>
        </notes>
      </species>
      <species id="M_glygn4_e" name="glycogen, structure 4 (glycogenin-1,6-{2[1,4-Glc], [1,4-Glc]})" compartment="e" hasOnlySubstanceUnits="false" boundaryCondition="false" constant="false">
        <notes>
          <body xmlns="http://www.w3.org/1999/xhtml">
            <p>FORMULA: C18H31O16X</p>
            <p>CHARGE: 0</p>
          </body>
        </notes>
      </species>
      <species id="M_glygn5_e" name="glycogen, structure 5 (glycogenin-2[1,4-Glc])" compartment="e" hasOnlySubstanceUnits="false" boundaryCondition="false" constant="false">
        <notes>
          <body xmlns="http://www.w3.org/1999/xhtml">
            <p>FORMULA: C12H21O11X</p>
            <p>CHARGE: 0</p>
          </body>
        </notes>
      </species>
      <species id="M_gm1_hs_c" name="ganglioside GM1 (homo sapiens)" compartment="c" hasOnlySubstanceUnits="false" boundaryCondition="false" constant="false">
        <notes>
          <body xmlns="http://www.w3.org/1999/xhtml">
            <p>FORMULA: C55H95N3O30FULLRCO</p>
            <p>CHARGE: 0</p>
          </body>
        </notes>
      </species>
      <species id="M_gm1a_hs_c" name="GM1alpha (homo sapiens)" compartment="c" hasOnlySubstanceUnits="false" boundaryCondition="false" constant="false">
        <notes>
          <body xmlns="http://www.w3.org/1999/xhtml">
            <p>FORMULA: C55H95N3O30FULLRCO</p>
            <p>CHARGE: 0</p>
          </body>
        </notes>
      </species>
      <species id="M_gm1b_hs_c" name="GM1b (homo sapiens)" compartment="c" hasOnlySubstanceUnits="false" boundaryCondition="false" constant="false">
        <notes>
          <body xmlns="http://www.w3.org/1999/xhtml">
            <p>FORMULA: C55H95N3O30FULLRCO</p>
            <p>CHARGE: 0</p>
          </body>
        </notes>
      </species>
      <species id="M_gm2_hs_c" name="ganglioside GM2 (homo sapiens)" compartment="c" hasOnlySubstanceUnits="false" boundaryCondition="false" constant="false">
        <notes>
          <body xmlns="http://www.w3.org/1999/xhtml">
            <p>FORMULA: C49H85N3O25FULLRCO</p>
            <p>CHARGE: 0</p>
          </body>
        </notes>
      </species>
      <species id="M_gm2a_hs_c" name="GM2alpha (homo sapiens)" compartment="c" hasOnlySubstanceUnits="false" boundaryCondition="false" constant="false">
        <notes>
          <body xmlns="http://www.w3.org/1999/xhtml">
            <p>FORMULA: C49H85N3O25FULLRCO</p>
            <p>CHARGE: 0</p>
          </body>
        </notes>
      </species>
      <species id="M_gm3_hs_c" name="ganglioside GM3 (homo sapiens)" compartment="c" hasOnlySubstanceUnits="false" boundaryCondition="false" constant="false">
        <notes>
          <body xmlns="http://www.w3.org/1999/xhtml">
            <p>FORMULA: C41H72N2O20FULLRCO</p>
            <p>CHARGE: 0</p>
          </body>
        </notes>
      </species>
      <species id="M_gmp_c" name="GMP" compartment="c" hasOnlySubstanceUnits="false" boundaryCondition="false" constant="false">
        <notes>
          <body xmlns="http://www.w3.org/1999/xhtml">
            <p>FORMULA: C10H12N5O8P</p>
            <p>CHARGE: 0</p>
          </body>
        </notes>
      </species>
      <species id="M_gmp_e" name="GMP" compartment="e" hasOnlySubstanceUnits="false" boundaryCondition="false" constant="false">
        <notes>
          <body xmlns="http://www.w3.org/1999/xhtml">
            <p>FORMULA: C10H12N5O8P</p>
            <p>CHARGE: 0</p>
          </body>
        </notes>
      </species>
      <species id="M_gncore1_c" name="GlcNAc-alpha-1,4-Core 1" compartment="c" hasOnlySubstanceUnits="false" boundaryCondition="false" constant="false">
        <notes>
          <body xmlns="http://www.w3.org/1999/xhtml">
            <p>FORMULA: C22H37N2O15X</p>
            <p>CHARGE: 0</p>
          </body>
        </notes>
      </species>
      <species id="M_gncore2_c" name="GlcNAc-alpha-1,4-Core 2" compartment="c" hasOnlySubstanceUnits="false" boundaryCondition="false" constant="false">
        <notes>
          <body xmlns="http://www.w3.org/1999/xhtml">
            <p>FORMULA: C30H50N3O20X</p>
            <p>CHARGE: 0</p>
          </body>
        </notes>
      </species>
      <species id="M_gp1c_hs_c" name="GP1c (homo sapiens)" compartment="c" hasOnlySubstanceUnits="false" boundaryCondition="false" constant="false">
        <notes>
          <body xmlns="http://www.w3.org/1999/xhtml">
            <p>FORMULA: C99H159N7O62FULLRCO</p>
            <p>CHARGE: 0</p>
          </body>
        </notes>
      </species>
      <species id="M_gp1c_hs_e" name="GP1c (homo sapiens)" compartment="e" hasOnlySubstanceUnits="false" boundaryCondition="false" constant="false">
        <notes>
          <body xmlns="http://www.w3.org/1999/xhtml">
            <p>FORMULA: C99H159N7O62FULLRCO</p>
            <p>CHARGE: 0</p>
          </body>
        </notes>
      </species>
      <species id="M_gp1calpha_hs_c" name="GP1c alpha  (homo sapiens)" compartment="c" hasOnlySubstanceUnits="false" boundaryCondition="false" constant="false">
        <notes>
          <body xmlns="http://www.w3.org/1999/xhtml">
            <p>FORMULA: C99H159N7O62FULLRCO</p>
            <p>CHARGE: 0</p>
          </body>
        </notes>
      </species>
      <species id="M_gp1calpha_hs_e" name="GP1c alpha  (homo sapiens)" compartment="e" hasOnlySubstanceUnits="false" boundaryCondition="false" constant="false">
        <notes>
          <body xmlns="http://www.w3.org/1999/xhtml">
            <p>FORMULA: C99H159N7O62FULLRCO</p>
            <p>CHARGE: 0</p>
          </body>
        </notes>
      </species>
      <species id="M_gpail_hs_c" name="D-glucosaminylphosphatidylinositol" compartment="c" hasOnlySubstanceUnits="false" boundaryCondition="false" constant="false">
        <notes>
          <body xmlns="http://www.w3.org/1999/xhtml">
            <p>FORMULA: C15H28NO13PFULLRCO2FULLR2CO2</p>
            <p>CHARGE: 0</p>
          </body>
        </notes>
      </species>
      <species id="M_gpi_hs_c" name="glycophosphatidylinositol (GPI) anchor precursor (3-(phosphoethanolaminyl-mannosyl)-glucosaminyl-acylphosphatidylinositol) (H8)" compartment="c" hasOnlySubstanceUnits="false" boundaryCondition="false" constant="false">
        <notes>
          <body xmlns="http://www.w3.org/1999/xhtml">
            <p>FORMULA: C55H106N4O38P4FULLRCO2FULLR2CO2</p>
            <p>CHARGE: 0</p>
          </body>
        </notes>
      </species>
      <species id="M_gpi_prot_hs_c" name="glycophosphatidylinositol (GPI)-anchored protein" compartment="c" hasOnlySubstanceUnits="false" boundaryCondition="false" constant="false">
        <notes>
          <body xmlns="http://www.w3.org/1999/xhtml">
            <p>FORMULA: C55H106N4O38P4FULLRCO2FULLR2CO2X</p>
            <p>CHARGE: 0</p>
          </body>
        </notes>
      </species>
      <species id="M_gpi_sig_c" name="glycophosphatidylinositol (GPI) signal sequence (C-terminal peptide)" compartment="c" hasOnlySubstanceUnits="false" boundaryCondition="false" constant="false">
        <notes>
          <body xmlns="http://www.w3.org/1999/xhtml">
            <p>FORMULA: Y</p>
            <p>CHARGE: 0</p>
          </body>
        </notes>
      </species>
      <species id="M_gq1b_hs_c" name="GQ1b (homo sapiens)" compartment="c" hasOnlySubstanceUnits="false" boundaryCondition="false" constant="false">
        <notes>
          <body xmlns="http://www.w3.org/1999/xhtml">
            <p>FORMULA: C88H143N6O54FULLRCO</p>
            <p>CHARGE: 0</p>
          </body>
        </notes>
      </species>
      <species id="M_gq1b_hs_e" name="GQ1b (homo sapiens)" compartment="e" hasOnlySubstanceUnits="false" boundaryCondition="false" constant="false">
        <notes>
          <body xmlns="http://www.w3.org/1999/xhtml">
            <p>FORMULA: C88H143N6O54FULLRCO</p>
            <p>CHARGE: 0</p>
          </body>
        </notes>
      </species>
      <species id="M_gq1balpha_hs_c" name="GQ1balpha (homo sapiens)" compartment="c" hasOnlySubstanceUnits="false" boundaryCondition="false" constant="false">
        <notes>
          <body xmlns="http://www.w3.org/1999/xhtml">
            <p>FORMULA: C88H143N6O54FULLRCO</p>
            <p>CHARGE: 0</p>
          </body>
        </notes>
      </species>
      <species id="M_gq1balpha_hs_e" name="GQ1balpha (homo sapiens)" compartment="e" hasOnlySubstanceUnits="false" boundaryCondition="false" constant="false">
        <notes>
          <body xmlns="http://www.w3.org/1999/xhtml">
            <p>FORMULA: C88H143N6O54FULLRCO</p>
            <p>CHARGE: 0</p>
          </body>
        </notes>
      </species>
      <species id="M_gq1c_hs_c" name="GQ1c (homo sapiens)" compartment="c" hasOnlySubstanceUnits="false" boundaryCondition="false" constant="false">
        <notes>
          <body xmlns="http://www.w3.org/1999/xhtml">
            <p>FORMULA: C88H143N6O54FULLRCO</p>
            <p>CHARGE: 0</p>
          </body>
        </notes>
      </species>
      <species id="M_grdp_c" name="Geranyl diphosphate" compartment="c" hasOnlySubstanceUnits="false" boundaryCondition="false" constant="false">
        <notes>
          <body xmlns="http://www.w3.org/1999/xhtml">
            <p>FORMULA: C10H17O7P2</p>
            <p>CHARGE: 0</p>
          </body>
        </notes>
      </species>
      <species id="M_gsn_c" name="Guanosine" compartment="c" hasOnlySubstanceUnits="false" boundaryCondition="false" constant="false">
        <notes>
          <body xmlns="http://www.w3.org/1999/xhtml">
            <p>FORMULA: C10H13N5O5</p>
            <p>CHARGE: 0</p>
          </body>
        </notes>
      </species>
      <species id="M_gsn_e" name="Guanosine" compartment="e" hasOnlySubstanceUnits="false" boundaryCondition="false" constant="false">
        <notes>
          <body xmlns="http://www.w3.org/1999/xhtml">
            <p>FORMULA: C10H13N5O5</p>
            <p>CHARGE: 0</p>
          </body>
        </notes>
      </species>
      <species id="M_gt1a_hs_c" name="GT1a (homo sapiens)" compartment="c" hasOnlySubstanceUnits="false" boundaryCondition="false" constant="false">
        <notes>
          <body xmlns="http://www.w3.org/1999/xhtml">
            <p>FORMULA: C77H127N5O46FULLRCO</p>
            <p>CHARGE: 0</p>
          </body>
        </notes>
      </species>
      <species id="M_gt1a_hs_e" name="GT1a (homo sapiens)" compartment="e" hasOnlySubstanceUnits="false" boundaryCondition="false" constant="false">
        <notes>
          <body xmlns="http://www.w3.org/1999/xhtml">
            <p>FORMULA: C77H127N5O46FULLRCO</p>
            <p>CHARGE: 0</p>
          </body>
        </notes>
      </species>
      <species id="M_gt1alpha_hs_c" name="GT1aalpha (homo sapiens)" compartment="c" hasOnlySubstanceUnits="false" boundaryCondition="false" constant="false">
        <notes>
          <body xmlns="http://www.w3.org/1999/xhtml">
            <p>FORMULA: C77H127N5O46FULLRCO</p>
            <p>CHARGE: 0</p>
          </body>
        </notes>
      </species>
      <species id="M_gt1b_hs_c" name="GT1b (homo sapiens)" compartment="c" hasOnlySubstanceUnits="false" boundaryCondition="false" constant="false">
        <notes>
          <body xmlns="http://www.w3.org/1999/xhtml">
            <p>FORMULA: C77H127N5O46FULLRCO</p>
            <p>CHARGE: 0</p>
          </body>
        </notes>
      </species>
      <species id="M_gt1c_hs_c" name="GT1c (homo sapiens)" compartment="c" hasOnlySubstanceUnits="false" boundaryCondition="false" constant="false">
        <notes>
          <body xmlns="http://www.w3.org/1999/xhtml">
            <p>FORMULA: C77H127N5O46FULLRCO</p>
            <p>CHARGE: 0</p>
          </body>
        </notes>
      </species>
      <species id="M_gt2_hs_c" name="GT2 (homo sapiens)" compartment="c" hasOnlySubstanceUnits="false" boundaryCondition="false" constant="false">
        <notes>
          <body xmlns="http://www.w3.org/1999/xhtml">
            <p>FORMULA: C71H117N5O41FULLRCO</p>
            <p>CHARGE: 0</p>
          </body>
        </notes>
      </species>
      <species id="M_gt3_hs_c" name="GT3 (homo sapiens)" compartment="c" hasOnlySubstanceUnits="false" boundaryCondition="false" constant="false">
        <notes>
          <body xmlns="http://www.w3.org/1999/xhtml">
            <p>FORMULA: C63H104N4O36FULLRCO</p>
            <p>CHARGE: 0</p>
          </body>
        </notes>
      </species>
      <species id="M_gthox_c" name="Oxidized glutathione" compartment="c" hasOnlySubstanceUnits="false" boundaryCondition="false" constant="false">
        <notes>
          <body xmlns="http://www.w3.org/1999/xhtml">
            <p>FORMULA: C20H30N6O12S2</p>
            <p>CHARGE: 0</p>
          </body>
        </notes>
      </species>
      <species id="M_gthox_e" name="Oxidized glutathione" compartment="e" hasOnlySubstanceUnits="false" boundaryCondition="false" constant="false">
        <notes>
          <body xmlns="http://www.w3.org/1999/xhtml">
            <p>FORMULA: C20H30N6O12S2</p>
            <p>CHARGE: 0</p>
          </body>
        </notes>
      </species>
      <species id="M_gthrd_c" name="Reduced glutathione" compartment="c" hasOnlySubstanceUnits="false" boundaryCondition="false" constant="false">
        <notes>
          <body xmlns="http://www.w3.org/1999/xhtml">
            <p>FORMULA: C10H16N3O6S</p>
            <p>CHARGE: 0</p>
          </body>
        </notes>
      </species>
      <species id="M_gthrd_e" name="Reduced glutathione" compartment="e" hasOnlySubstanceUnits="false" boundaryCondition="false" constant="false">
        <notes>
          <body xmlns="http://www.w3.org/1999/xhtml">
            <p>FORMULA: C10H16N3O6S</p>
            <p>CHARGE: 0</p>
          </body>
        </notes>
      </species>
      <species id="M_gtp_c" name="GTP" compartment="c" hasOnlySubstanceUnits="false" boundaryCondition="false" constant="false">
        <notes>
          <body xmlns="http://www.w3.org/1999/xhtml">
            <p>FORMULA: C10H12N5O14P3</p>
            <p>CHARGE: 0</p>
          </body>
        </notes>
      </species>
      <species id="M_gtp_e" name="GTP" compartment="e" hasOnlySubstanceUnits="false" boundaryCondition="false" constant="false">
        <notes>
          <body xmlns="http://www.w3.org/1999/xhtml">
            <p>FORMULA: C10H12N5O14P3</p>
            <p>CHARGE: 0</p>
          </body>
        </notes>
      </species>
      <species id="M_gua_c" name="Guanine" compartment="c" hasOnlySubstanceUnits="false" boundaryCondition="false" constant="false">
        <notes>
          <body xmlns="http://www.w3.org/1999/xhtml">
            <p>FORMULA: C5H5N5O</p>
            <p>CHARGE: 0</p>
          </body>
        </notes>
      </species>
      <species id="M_gua_e" name="Guanine" compartment="e" hasOnlySubstanceUnits="false" boundaryCondition="false" constant="false">
        <notes>
          <body xmlns="http://www.w3.org/1999/xhtml">
            <p>FORMULA: C5H5N5O</p>
            <p>CHARGE: 0</p>
          </body>
        </notes>
      </species>
      <species id="M_gudac_c" name="Guanidinoacetate" compartment="c" hasOnlySubstanceUnits="false" boundaryCondition="false" constant="false">
        <notes>
          <body xmlns="http://www.w3.org/1999/xhtml">
            <p>FORMULA: C3H7N3O2</p>
            <p>CHARGE: 0</p>
          </body>
        </notes>
      </species>
      <species id="M_gullac_c" name="L-Gulono-1,4-lactone" compartment="c" hasOnlySubstanceUnits="false" boundaryCondition="false" constant="false">
        <notes>
          <body xmlns="http://www.w3.org/1999/xhtml">
            <p>FORMULA: C6H10O6</p>
            <p>CHARGE: 0</p>
          </body>
        </notes>
      </species>
      <species id="M_guln_c" name="L-Gulonate" compartment="c" hasOnlySubstanceUnits="false" boundaryCondition="false" constant="false">
        <notes>
          <body xmlns="http://www.w3.org/1999/xhtml">
            <p>FORMULA: C6H11O7</p>
            <p>CHARGE: 0</p>
          </body>
        </notes>
      </species>
      <species id="M_h2co3_c" name="carbonic acid" compartment="c" hasOnlySubstanceUnits="false" boundaryCondition="false" constant="false">
        <notes>
          <body xmlns="http://www.w3.org/1999/xhtml">
            <p>FORMULA: H2CO3</p>
            <p>CHARGE: 0</p>
          </body>
        </notes>
      </species>
      <species id="M_h2o2_c" name="Hydrogen peroxide" compartment="c" hasOnlySubstanceUnits="false" boundaryCondition="false" constant="false">
        <notes>
          <body xmlns="http://www.w3.org/1999/xhtml">
            <p>FORMULA: H2O2</p>
            <p>CHARGE: 0</p>
          </body>
        </notes>
      </species>
      <species id="M_h2o2_e" name="Hydrogen peroxide" compartment="e" hasOnlySubstanceUnits="false" boundaryCondition="false" constant="false">
        <notes>
          <body xmlns="http://www.w3.org/1999/xhtml">
            <p>FORMULA: H2O2</p>
            <p>CHARGE: 0</p>
          </body>
        </notes>
      </species>
      <species id="M_h2o_c" name="H2O" compartment="c" hasOnlySubstanceUnits="false" boundaryCondition="false" constant="false">
        <notes>
          <body xmlns="http://www.w3.org/1999/xhtml">
            <p>FORMULA: H2O</p>
            <p>CHARGE: 0</p>
          </body>
        </notes>
      </species>
      <species id="M_h2o_e" name="H2O" compartment="e" hasOnlySubstanceUnits="false" boundaryCondition="false" constant="false">
        <notes>
          <body xmlns="http://www.w3.org/1999/xhtml">
            <p>FORMULA: H2O</p>
            <p>CHARGE: 0</p>
          </body>
        </notes>
      </species>
      <species id="M_hLkynr_c" name="3-Hydroxy-L-kynurenine" compartment="c" hasOnlySubstanceUnits="false" boundaryCondition="false" constant="false">
        <notes>
          <body xmlns="http://www.w3.org/1999/xhtml">
            <p>FORMULA: C10H12N2O4</p>
            <p>CHARGE: 0</p>
          </body>
        </notes>
      </species>
      <species id="M_h_c" name="H+" compartment="c" hasOnlySubstanceUnits="false" boundaryCondition="false" constant="false">
        <notes>
          <body xmlns="http://www.w3.org/1999/xhtml">
            <p>FORMULA: H</p>
            <p>CHARGE: 0</p>
          </body>
        </notes>
      </species>
      <species id="M_h_e" name="H+" compartment="e" hasOnlySubstanceUnits="false" boundaryCondition="false" constant="false">
        <notes>
          <body xmlns="http://www.w3.org/1999/xhtml">
            <p>FORMULA: H</p>
            <p>CHARGE: 0</p>
          </body>
        </notes>
      </species>
      <species id="M_ha_c" name="hyaluronan" compartment="c" hasOnlySubstanceUnits="false" boundaryCondition="false" constant="false">
        <notes>
          <body xmlns="http://www.w3.org/1999/xhtml">
            <p>FORMULA: C28H40N2O22</p>
            <p>CHARGE: 0</p>
          </body>
        </notes>
      </species>
      <species id="M_ha_deg1_c" name="hyaluronan degradation product 1" compartment="c" hasOnlySubstanceUnits="false" boundaryCondition="false" constant="false">
        <notes>
          <body xmlns="http://www.w3.org/1999/xhtml">
            <p>FORMULA: C22H33N2O16</p>
            <p>CHARGE: 0</p>
          </body>
        </notes>
      </species>
      <species id="M_ha_e" name="hyaluronan" compartment="e" hasOnlySubstanceUnits="false" boundaryCondition="false" constant="false">
        <notes>
          <body xmlns="http://www.w3.org/1999/xhtml">
            <p>FORMULA: C28H40N2O22</p>
            <p>CHARGE: 0</p>
          </body>
        </notes>
      </species>
      <species id="M_ha_pre1_c" name="hyaluronan biosynthesis, precursor 1" compartment="c" hasOnlySubstanceUnits="false" boundaryCondition="false" constant="false">
        <notes>
          <body xmlns="http://www.w3.org/1999/xhtml">
            <p>FORMULA: C14H20NO11</p>
            <p>CHARGE: 0</p>
          </body>
        </notes>
      </species>
      <species id="M_ha_pre1_e" name="hyaluronan biosynthesis, precursor 1" compartment="e" hasOnlySubstanceUnits="false" boundaryCondition="false" constant="false">
        <notes>
          <body xmlns="http://www.w3.org/1999/xhtml">
            <p>FORMULA: C14H20NO11</p>
            <p>CHARGE: 0</p>
          </body>
        </notes>
      </species>
      <species id="M_hco3_c" name="Bicarbonate" compartment="c" hasOnlySubstanceUnits="false" boundaryCondition="false" constant="false">
        <notes>
          <body xmlns="http://www.w3.org/1999/xhtml">
            <p>FORMULA: CHO3</p>
            <p>CHARGE: 0</p>
          </body>
        </notes>
      </species>
      <species id="M_hco3_e" name="Bicarbonate" compartment="e" hasOnlySubstanceUnits="false" boundaryCondition="false" constant="false">
        <notes>
          <body xmlns="http://www.w3.org/1999/xhtml">
            <p>FORMULA: CHO3</p>
            <p>CHARGE: 0</p>
          </body>
        </notes>
      </species>
      <species id="M_hcoumarin_c" name="hydroxy coumarin" compartment="c" hasOnlySubstanceUnits="false" boundaryCondition="false" constant="false">
        <notes>
          <body xmlns="http://www.w3.org/1999/xhtml">
            <p>FORMULA: C9H6O3</p>
            <p>CHARGE: 0</p>
          </body>
        </notes>
      </species>
      <species id="M_hcoumarin_e" name="hydroxy coumarin" compartment="e" hasOnlySubstanceUnits="false" boundaryCondition="false" constant="false">
        <notes>
          <body xmlns="http://www.w3.org/1999/xhtml">
            <p>FORMULA: C9H6O3</p>
            <p>CHARGE: 0</p>
          </body>
        </notes>
      </species>
      <species id="M_hcys_DASH_L_c" name="L-Homocysteine" compartment="c" hasOnlySubstanceUnits="false" boundaryCondition="false" constant="false">
        <notes>
          <body xmlns="http://www.w3.org/1999/xhtml">
            <p>FORMULA: C4H9NO2S</p>
            <p>CHARGE: 0</p>
          </body>
        </notes>
      </species>
      <species id="M_hdca_c" name="Hexadecanoate (n-C16:0)" compartment="c" hasOnlySubstanceUnits="false" boundaryCondition="false" constant="false">
        <notes>
          <body xmlns="http://www.w3.org/1999/xhtml">
            <p>FORMULA: C16H31O2</p>
            <p>CHARGE: 0</p>
          </body>
        </notes>
      </species>
      <species id="M_hdca_e" name="Hexadecanoate (n-C16:0)" compartment="e" hasOnlySubstanceUnits="false" boundaryCondition="false" constant="false">
        <notes>
          <body xmlns="http://www.w3.org/1999/xhtml">
            <p>FORMULA: C16H31O2</p>
            <p>CHARGE: 0</p>
          </body>
        </notes>
      </species>
      <species id="M_hdcea_c" name="Hexadecenoate (n-C16:1)" compartment="c" hasOnlySubstanceUnits="false" boundaryCondition="false" constant="false">
        <notes>
          <body xmlns="http://www.w3.org/1999/xhtml">
            <p>FORMULA: C16H29O2</p>
            <p>CHARGE: 0</p>
          </body>
        </notes>
      </species>
      <species id="M_hdcea_e" name="Hexadecenoate (n-C16:1)" compartment="e" hasOnlySubstanceUnits="false" boundaryCondition="false" constant="false">
        <notes>
          <body xmlns="http://www.w3.org/1999/xhtml">
            <p>FORMULA: C16H29O2</p>
            <p>CHARGE: 0</p>
          </body>
        </notes>
      </species>
      <species id="M_hdcecrn_c" name="Hexadecenoyl carnitine" compartment="c" hasOnlySubstanceUnits="false" boundaryCondition="false" constant="false">
        <notes>
          <body xmlns="http://www.w3.org/1999/xhtml">
            <p>FORMULA: C23H43NO4</p>
            <p>CHARGE: 0</p>
          </body>
        </notes>
      </species>
      <species id="M_hdcoa_c" name="Hexadecenoyl-CoA (n-C16:1CoA)" compartment="c" hasOnlySubstanceUnits="false" boundaryCondition="false" constant="false">
        <notes>
          <body xmlns="http://www.w3.org/1999/xhtml">
            <p>FORMULA: C37H60N7O17P3S</p>
            <p>CHARGE: 0</p>
          </body>
        </notes>
      </species>
      <species id="M_hdd2coa_c" name="trans-Hexadec-2-enoyl-CoA" compartment="c" hasOnlySubstanceUnits="false" boundaryCondition="false" constant="false">
        <notes>
          <body xmlns="http://www.w3.org/1999/xhtml">
            <p>FORMULA: C37H60N7O17P3S</p>
            <p>CHARGE: 0</p>
          </body>
        </notes>
      </species>
      <species id="M_hdd2crn_c" name="trans-Hexadec-2-enoyl carnitine" compartment="c" hasOnlySubstanceUnits="false" boundaryCondition="false" constant="false">
        <notes>
          <body xmlns="http://www.w3.org/1999/xhtml">
            <p>FORMULA: C23H43NO4</p>
            <p>CHARGE: 0</p>
          </body>
        </notes>
      </species>
      <species id="M_hdeACP_c" name="cis-hexadec-9-enoyl-[acyl-carrier protein] (n-C16:1)" compartment="c" hasOnlySubstanceUnits="false" boundaryCondition="false" constant="false">
        <notes>
          <body xmlns="http://www.w3.org/1999/xhtml">
            <p>FORMULA: C27H49N2O8PRS</p>
            <p>CHARGE: 0</p>
          </body>
        </notes>
      </species>
      <species id="M_hestratriol_c" name="4,17 dihydroxy estradiol" compartment="c" hasOnlySubstanceUnits="false" boundaryCondition="false" constant="false">
        <notes>
          <body xmlns="http://www.w3.org/1999/xhtml">
            <p>FORMULA: C18H24O3</p>
            <p>CHARGE: 0</p>
          </body>
        </notes>
      </species>
      <species id="M_hestratriol_e" name="4,17 dihydroxy estradiol" compartment="e" hasOnlySubstanceUnits="false" boundaryCondition="false" constant="false">
        <notes>
          <body xmlns="http://www.w3.org/1999/xhtml">
            <p>FORMULA: C18H24O3</p>
            <p>CHARGE: 0</p>
          </body>
        </notes>
      </species>
      <species id="M_hexc_c" name="hexacosanoate (n-C26:0)" compartment="c" hasOnlySubstanceUnits="false" boundaryCondition="false" constant="false">
        <notes>
          <body xmlns="http://www.w3.org/1999/xhtml">
            <p>FORMULA: C26H51O2</p>
            <p>CHARGE: 0</p>
          </body>
        </notes>
      </species>
      <species id="M_hexc_e" name="hexacosanoate (n-C26:0)" compartment="e" hasOnlySubstanceUnits="false" boundaryCondition="false" constant="false">
        <notes>
          <body xmlns="http://www.w3.org/1999/xhtml">
            <p>FORMULA: C26H51O2</p>
            <p>CHARGE: 0</p>
          </body>
        </notes>
      </species>
      <species id="M_hexccoa_c" name="Hexacosanoyl-CoA (n-C26:0CoA)" compartment="c" hasOnlySubstanceUnits="false" boundaryCondition="false" constant="false">
        <notes>
          <body xmlns="http://www.w3.org/1999/xhtml">
            <p>FORMULA: C47H82N7O17P3S</p>
            <p>CHARGE: 0</p>
          </body>
        </notes>
      </species>
      <species id="M_hexccrn_c" name="hexacosanoyl carnitine" compartment="c" hasOnlySubstanceUnits="false" boundaryCondition="false" constant="false">
        <notes>
          <body xmlns="http://www.w3.org/1999/xhtml">
            <p>FORMULA: C33H65NO4</p>
            <p>CHARGE: 0</p>
          </body>
        </notes>
      </species>
      <species id="M_hgentis_c" name="Homogentisate" compartment="c" hasOnlySubstanceUnits="false" boundaryCondition="false" constant="false">
        <notes>
          <body xmlns="http://www.w3.org/1999/xhtml">
            <p>FORMULA: C8H7O4</p>
            <p>CHARGE: 0</p>
          </body>
        </notes>
      </species>
      <species id="M_his_DASH_L_c" name="L-Histidine" compartment="c" hasOnlySubstanceUnits="false" boundaryCondition="false" constant="false">
        <notes>
          <body xmlns="http://www.w3.org/1999/xhtml">
            <p>FORMULA: C6H9N3O2</p>
            <p>CHARGE: 0</p>
          </body>
        </notes>
      </species>
      <species id="M_his_DASH_L_e" name="L-Histidine" compartment="e" hasOnlySubstanceUnits="false" boundaryCondition="false" constant="false">
        <notes>
          <body xmlns="http://www.w3.org/1999/xhtml">
            <p>FORMULA: C6H9N3O2</p>
            <p>CHARGE: 0</p>
          </body>
        </notes>
      </species>
      <species id="M_hista_c" name="Histamine" compartment="c" hasOnlySubstanceUnits="false" boundaryCondition="false" constant="false">
        <notes>
          <body xmlns="http://www.w3.org/1999/xhtml">
            <p>FORMULA: C5H10N3</p>
            <p>CHARGE: 0</p>
          </body>
        </notes>
      </species>
      <species id="M_hista_e" name="Histamine" compartment="e" hasOnlySubstanceUnits="false" boundaryCondition="false" constant="false">
        <notes>
          <body xmlns="http://www.w3.org/1999/xhtml">
            <p>FORMULA: C5H10N3</p>
            <p>CHARGE: 0</p>
          </body>
        </notes>
      </species>
      <species id="M_hmbil_c" name="Hydroxymethylbilane" compartment="c" hasOnlySubstanceUnits="false" boundaryCondition="false" constant="false">
        <notes>
          <body xmlns="http://www.w3.org/1999/xhtml">
            <p>FORMULA: C40H38N4O17</p>
            <p>CHARGE: 0</p>
          </body>
        </notes>
      </species>
      <species id="M_hmgcoa_c" name="Hydroxymethylglutaryl-CoA" compartment="c" hasOnlySubstanceUnits="false" boundaryCondition="false" constant="false">
        <notes>
          <body xmlns="http://www.w3.org/1999/xhtml">
            <p>FORMULA: C27H39N7O20P3S</p>
            <p>CHARGE: 0</p>
          </body>
        </notes>
      </species>
      <species id="M_hom_DASH_L_c" name="L-Homoserine" compartment="c" hasOnlySubstanceUnits="false" boundaryCondition="false" constant="false">
        <notes>
          <body xmlns="http://www.w3.org/1999/xhtml">
            <p>FORMULA: C4H9NO3</p>
            <p>CHARGE: 0</p>
          </body>
        </notes>
      </species>
      <species id="M_hom_DASH_L_e" name="L-Homoserine" compartment="e" hasOnlySubstanceUnits="false" boundaryCondition="false" constant="false">
        <notes>
          <body xmlns="http://www.w3.org/1999/xhtml">
            <p>FORMULA: C4H9NO3</p>
            <p>CHARGE: 0</p>
          </body>
        </notes>
      </species>
      <species id="M_homoval_c" name="Homovanillate" compartment="c" hasOnlySubstanceUnits="false" boundaryCondition="false" constant="false">
        <notes>
          <body xmlns="http://www.w3.org/1999/xhtml">
            <p>FORMULA: C9H9O4</p>
            <p>CHARGE: 0</p>
          </body>
        </notes>
      </species>
      <species id="M_hpdca_c" name="heptadecanoate" compartment="c" hasOnlySubstanceUnits="false" boundaryCondition="false" constant="false">
        <notes>
          <body xmlns="http://www.w3.org/1999/xhtml">
            <p>FORMULA: C17H33O2</p>
            <p>CHARGE: 0</p>
          </body>
        </notes>
      </species>
      <species id="M_hpdca_e" name="heptadecanoate" compartment="e" hasOnlySubstanceUnits="false" boundaryCondition="false" constant="false">
        <notes>
          <body xmlns="http://www.w3.org/1999/xhtml">
            <p>FORMULA: C17H33O2</p>
            <p>CHARGE: 0</p>
          </body>
        </notes>
      </species>
      <species id="M_hpdcacoa_c" name="heptadecanoyl coa" compartment="c" hasOnlySubstanceUnits="false" boundaryCondition="false" constant="false">
        <notes>
          <body xmlns="http://www.w3.org/1999/xhtml">
            <p>FORMULA: C38H64N7O17P3S</p>
            <p>CHARGE: 0</p>
          </body>
        </notes>
      </species>
      <species id="M_hpdcacrn_c" name="heptadecanoyl carnitine" compartment="c" hasOnlySubstanceUnits="false" boundaryCondition="false" constant="false">
        <notes>
          <body xmlns="http://www.w3.org/1999/xhtml">
            <p>FORMULA: C24H47NO4</p>
            <p>CHARGE: 0</p>
          </body>
        </notes>
      </species>
      <species id="M_hpyr_c" name="Hydroxypyruvate" compartment="c" hasOnlySubstanceUnits="false" boundaryCondition="false" constant="false">
        <notes>
          <body xmlns="http://www.w3.org/1999/xhtml">
            <p>FORMULA: C3H3O4</p>
            <p>CHARGE: 0</p>
          </body>
        </notes>
      </species>
      <species id="M_hretn_c" name="4 hydroxy retinoic acid" compartment="c" hasOnlySubstanceUnits="false" boundaryCondition="false" constant="false">
        <notes>
          <body xmlns="http://www.w3.org/1999/xhtml">
            <p>FORMULA: C20H27O3</p>
            <p>CHARGE: 0</p>
          </body>
        </notes>
      </species>
      <species id="M_hs_c" name="heparan sulfate, free chain" compartment="c" hasOnlySubstanceUnits="false" boundaryCondition="false" constant="false">
        <notes>
          <body xmlns="http://www.w3.org/1999/xhtml">
            <p>FORMULA: C79H114N5O102S12</p>
            <p>CHARGE: 0</p>
          </body>
        </notes>
      </species>
      <species id="M_hs_deg10_c" name="heparan sulfate, degradation product 10" compartment="c" hasOnlySubstanceUnits="false" boundaryCondition="false" constant="false">
        <notes>
          <body xmlns="http://www.w3.org/1999/xhtml">
            <p>FORMULA: C55H80N3O70S8</p>
            <p>CHARGE: 0</p>
          </body>
        </notes>
      </species>
      <species id="M_hs_deg11_c" name="heparan sulfate, degradation product 11" compartment="c" hasOnlySubstanceUnits="false" boundaryCondition="false" constant="false">
        <notes>
          <body xmlns="http://www.w3.org/1999/xhtml">
            <p>FORMULA: C55H81N3O67S7</p>
            <p>CHARGE: 0</p>
          </body>
        </notes>
      </species>
      <species id="M_hs_deg12_c" name="heparan sulfate, degradation product 12" compartment="c" hasOnlySubstanceUnits="false" boundaryCondition="false" constant="false">
        <notes>
          <body xmlns="http://www.w3.org/1999/xhtml">
            <p>FORMULA: C55H82N3O64S6</p>
            <p>CHARGE: 0</p>
          </body>
        </notes>
      </species>
      <species id="M_hs_deg13_c" name="heparan sulfate, degradation product 13" compartment="c" hasOnlySubstanceUnits="false" boundaryCondition="false" constant="false">
        <notes>
          <body xmlns="http://www.w3.org/1999/xhtml">
            <p>FORMULA: C55H83N3O61S5</p>
            <p>CHARGE: 0</p>
          </body>
        </notes>
      </species>
      <species id="M_hs_deg14_c" name="heparan sulfate, degradation product 14" compartment="c" hasOnlySubstanceUnits="false" boundaryCondition="false" constant="false">
        <notes>
          <body xmlns="http://www.w3.org/1999/xhtml">
            <p>FORMULA: C57H84N3O62S5</p>
            <p>CHARGE: 0</p>
          </body>
        </notes>
      </species>
      <species id="M_hs_deg15_c" name="heparan sulfate, degradation product 15" compartment="c" hasOnlySubstanceUnits="false" boundaryCondition="false" constant="false">
        <notes>
          <body xmlns="http://www.w3.org/1999/xhtml">
            <p>FORMULA: C49H71N2O57S5</p>
            <p>CHARGE: 0</p>
          </body>
        </notes>
      </species>
      <species id="M_hs_deg16_c" name="heparan sulfate, degradation product 16" compartment="c" hasOnlySubstanceUnits="false" boundaryCondition="false" constant="false">
        <notes>
          <body xmlns="http://www.w3.org/1999/xhtml">
            <p>FORMULA: C49H72N2O54S4</p>
            <p>CHARGE: 0</p>
          </body>
        </notes>
      </species>
      <species id="M_hs_deg17_c" name="heparan sulfate, degradation product 17" compartment="c" hasOnlySubstanceUnits="false" boundaryCondition="false" constant="false">
        <notes>
          <body xmlns="http://www.w3.org/1999/xhtml">
            <p>FORMULA: C43H65N2O48S4</p>
            <p>CHARGE: 0</p>
          </body>
        </notes>
      </species>
      <species id="M_hs_deg18_c" name="heparan sulfate, degradation product 18" compartment="c" hasOnlySubstanceUnits="false" boundaryCondition="false" constant="false">
        <notes>
          <body xmlns="http://www.w3.org/1999/xhtml">
            <p>FORMULA: C43H66N2O45S3</p>
            <p>CHARGE: 0</p>
          </body>
        </notes>
      </species>
      <species id="M_hs_deg19_c" name="heparan sulfate, degradation product 19" compartment="c" hasOnlySubstanceUnits="false" boundaryCondition="false" constant="false">
        <notes>
          <body xmlns="http://www.w3.org/1999/xhtml">
            <p>FORMULA: C43H67N2O42S2</p>
            <p>CHARGE: 0</p>
          </body>
        </notes>
      </species>
      <species id="M_hs_deg1_c" name="heparan sulfate, degradation product 1" compartment="c" hasOnlySubstanceUnits="false" boundaryCondition="false" constant="false">
        <notes>
          <body xmlns="http://www.w3.org/1999/xhtml">
            <p>FORMULA: C79H115N5O99S11</p>
            <p>CHARGE: 0</p>
          </body>
        </notes>
      </species>
      <species id="M_hs_deg20_c" name="heparan sulfate, degradation product 20" compartment="c" hasOnlySubstanceUnits="false" boundaryCondition="false" constant="false">
        <notes>
          <body xmlns="http://www.w3.org/1999/xhtml">
            <p>FORMULA: C45H68N2O43S2</p>
            <p>CHARGE: 0</p>
          </body>
        </notes>
      </species>
      <species id="M_hs_deg21_c" name="heparan sulfate, degradation product 21" compartment="c" hasOnlySubstanceUnits="false" boundaryCondition="false" constant="false">
        <notes>
          <body xmlns="http://www.w3.org/1999/xhtml">
            <p>FORMULA: C37H55NO38S2</p>
            <p>CHARGE: 0</p>
          </body>
        </notes>
      </species>
      <species id="M_hs_deg22_c" name="heparan sulfate, degradation product 22" compartment="c" hasOnlySubstanceUnits="false" boundaryCondition="false" constant="false">
        <notes>
          <body xmlns="http://www.w3.org/1999/xhtml">
            <p>FORMULA: C37H56NO35S</p>
            <p>CHARGE: 0</p>
          </body>
        </notes>
      </species>
      <species id="M_hs_deg23_c" name="heparan sulfate, degradation product 23" compartment="c" hasOnlySubstanceUnits="false" boundaryCondition="false" constant="false">
        <notes>
          <body xmlns="http://www.w3.org/1999/xhtml">
            <p>FORMULA: C31H49NO29S</p>
            <p>CHARGE: 0</p>
          </body>
        </notes>
      </species>
      <species id="M_hs_deg24_c" name="heparan sulfate, degradation product 24" compartment="c" hasOnlySubstanceUnits="false" boundaryCondition="false" constant="false">
        <notes>
          <body xmlns="http://www.w3.org/1999/xhtml">
            <p>FORMULA: C31H50NO26</p>
            <p>CHARGE: 0</p>
          </body>
        </notes>
      </species>
      <species id="M_hs_deg25_c" name="heparan sulfate, degradation product 25" compartment="c" hasOnlySubstanceUnits="false" boundaryCondition="false" constant="false">
        <notes>
          <body xmlns="http://www.w3.org/1999/xhtml">
            <p>FORMULA: C23H37O21</p>
            <p>CHARGE: 0</p>
          </body>
        </notes>
      </species>
      <species id="M_hs_deg2_c" name="heparan sulfate, degradation product 2" compartment="c" hasOnlySubstanceUnits="false" boundaryCondition="false" constant="false">
        <notes>
          <body xmlns="http://www.w3.org/1999/xhtml">
            <p>FORMULA: C79H116N5O96S10</p>
            <p>CHARGE: 0</p>
          </body>
        </notes>
      </species>
      <species id="M_hs_deg3_c" name="heparan sulfate, degradation product 3" compartment="c" hasOnlySubstanceUnits="false" boundaryCondition="false" constant="false">
        <notes>
          <body xmlns="http://www.w3.org/1999/xhtml">
            <p>FORMULA: C81H117N5O97S10</p>
            <p>CHARGE: 0</p>
          </body>
        </notes>
      </species>
      <species id="M_hs_deg4_c" name="heparan sulfate, degradation product 4" compartment="c" hasOnlySubstanceUnits="false" boundaryCondition="false" constant="false">
        <notes>
          <body xmlns="http://www.w3.org/1999/xhtml">
            <p>FORMULA: C73H104N4O92S10</p>
            <p>CHARGE: 0</p>
          </body>
        </notes>
      </species>
      <species id="M_hs_deg5_c" name="heparan sulfate, degradation product 5" compartment="c" hasOnlySubstanceUnits="false" boundaryCondition="false" constant="false">
        <notes>
          <body xmlns="http://www.w3.org/1999/xhtml">
            <p>FORMULA: C67H97N4O86S10</p>
            <p>CHARGE: 0</p>
          </body>
        </notes>
      </species>
      <species id="M_hs_deg6_c" name="heparan sulfate, degradation product 6" compartment="c" hasOnlySubstanceUnits="false" boundaryCondition="false" constant="false">
        <notes>
          <body xmlns="http://www.w3.org/1999/xhtml">
            <p>FORMULA: C67H98N4O83S9</p>
            <p>CHARGE: 0</p>
          </body>
        </notes>
      </species>
      <species id="M_hs_deg7_c" name="heparan sulfate, degradation product 7" compartment="c" hasOnlySubstanceUnits="false" boundaryCondition="false" constant="false">
        <notes>
          <body xmlns="http://www.w3.org/1999/xhtml">
            <p>FORMULA: C67H99N4O80S8</p>
            <p>CHARGE: 0</p>
          </body>
        </notes>
      </species>
      <species id="M_hs_deg8_c" name="heparan sulfate, degradation product 8" compartment="c" hasOnlySubstanceUnits="false" boundaryCondition="false" constant="false">
        <notes>
          <body xmlns="http://www.w3.org/1999/xhtml">
            <p>FORMULA: C69H100N4O81S8</p>
            <p>CHARGE: 0</p>
          </body>
        </notes>
      </species>
      <species id="M_hs_deg9_c" name="heparan sulfate, degradation product 9" compartment="c" hasOnlySubstanceUnits="false" boundaryCondition="false" constant="false">
        <notes>
          <body xmlns="http://www.w3.org/1999/xhtml">
            <p>FORMULA: C61H87N3O76S8</p>
            <p>CHARGE: 0</p>
          </body>
        </notes>
      </species>
      <species id="M_hs_pre10_c" name="heparan sulfate, precursor 10" compartment="c" hasOnlySubstanceUnits="false" boundaryCondition="false" constant="false">
        <notes>
          <body xmlns="http://www.w3.org/1999/xhtml">
            <p>FORMULA: C79H121N5O77S4X</p>
            <p>CHARGE: 0</p>
          </body>
        </notes>
      </species>
      <species id="M_hs_pre11_c" name="heparan sulfate, precursor 11" compartment="c" hasOnlySubstanceUnits="false" boundaryCondition="false" constant="false">
        <notes>
          <body xmlns="http://www.w3.org/1999/xhtml">
            <p>FORMULA: C79H121N5O77S4X</p>
            <p>CHARGE: 0</p>
          </body>
        </notes>
      </species>
      <species id="M_hs_pre12_c" name="heparan sulfate, precursor 12" compartment="c" hasOnlySubstanceUnits="false" boundaryCondition="false" constant="false">
        <notes>
          <body xmlns="http://www.w3.org/1999/xhtml">
            <p>FORMULA: C79H119N5O83S6X</p>
            <p>CHARGE: 0</p>
          </body>
        </notes>
      </species>
      <species id="M_hs_pre13_c" name="heparan sulfate, precursor 13" compartment="c" hasOnlySubstanceUnits="false" boundaryCondition="false" constant="false">
        <notes>
          <body xmlns="http://www.w3.org/1999/xhtml">
            <p>FORMULA: C79H116N5O92S9X</p>
            <p>CHARGE: 0</p>
          </body>
        </notes>
      </species>
      <species id="M_hs_pre14_c" name="heparan sulfate, precursor 14" compartment="c" hasOnlySubstanceUnits="false" boundaryCondition="false" constant="false">
        <notes>
          <body xmlns="http://www.w3.org/1999/xhtml">
            <p>FORMULA: C79H115N5O95S10X</p>
            <p>CHARGE: 0</p>
          </body>
        </notes>
      </species>
      <species id="M_hs_pre15_c" name="heparan sulfate, precursor 15" compartment="c" hasOnlySubstanceUnits="false" boundaryCondition="false" constant="false">
        <notes>
          <body xmlns="http://www.w3.org/1999/xhtml">
            <p>FORMULA: C79H114N5O98S11X</p>
            <p>CHARGE: 0</p>
          </body>
        </notes>
      </species>
      <species id="M_hs_pre1_c" name="heparan sulfate, precursor 1" compartment="c" hasOnlySubstanceUnits="false" boundaryCondition="false" constant="false">
        <notes>
          <body xmlns="http://www.w3.org/1999/xhtml">
            <p>FORMULA: C31H49NO25X</p>
            <p>CHARGE: 0</p>
          </body>
        </notes>
      </species>
      <species id="M_hs_pre2_c" name="heparan sulfate, precursor 2" compartment="c" hasOnlySubstanceUnits="false" boundaryCondition="false" constant="false">
        <notes>
          <body xmlns="http://www.w3.org/1999/xhtml">
            <p>FORMULA: C37H56NO31X</p>
            <p>CHARGE: 0</p>
          </body>
        </notes>
      </species>
      <species id="M_hs_pre3_c" name="heparan sulfate, precursor 3" compartment="c" hasOnlySubstanceUnits="false" boundaryCondition="false" constant="false">
        <notes>
          <body xmlns="http://www.w3.org/1999/xhtml">
            <p>FORMULA: C45H69N2O36X</p>
            <p>CHARGE: 0</p>
          </body>
        </notes>
      </species>
      <species id="M_hs_pre4_c" name="heparan sulfate, precursor 4" compartment="c" hasOnlySubstanceUnits="false" boundaryCondition="false" constant="false">
        <notes>
          <body xmlns="http://www.w3.org/1999/xhtml">
            <p>FORMULA: C51H76N2O42X</p>
            <p>CHARGE: 0</p>
          </body>
        </notes>
      </species>
      <species id="M_hs_pre5_c" name="heparan sulfate, precursor 5" compartment="c" hasOnlySubstanceUnits="false" boundaryCondition="false" constant="false">
        <notes>
          <body xmlns="http://www.w3.org/1999/xhtml">
            <p>FORMULA: C59H89N3O47X</p>
            <p>CHARGE: 0</p>
          </body>
        </notes>
      </species>
      <species id="M_hs_pre6_c" name="heparan sulfate, precursor 6" compartment="c" hasOnlySubstanceUnits="false" boundaryCondition="false" constant="false">
        <notes>
          <body xmlns="http://www.w3.org/1999/xhtml">
            <p>FORMULA: C65H96N3O53X</p>
            <p>CHARGE: 0</p>
          </body>
        </notes>
      </species>
      <species id="M_hs_pre7_c" name="heparan sulfate, precursor 7" compartment="c" hasOnlySubstanceUnits="false" boundaryCondition="false" constant="false">
        <notes>
          <body xmlns="http://www.w3.org/1999/xhtml">
            <p>FORMULA: C73H109N4O58X</p>
            <p>CHARGE: 0</p>
          </body>
        </notes>
      </species>
      <species id="M_hs_pre8_c" name="heparan sulfate, precursor 8" compartment="c" hasOnlySubstanceUnits="false" boundaryCondition="false" constant="false">
        <notes>
          <body xmlns="http://www.w3.org/1999/xhtml">
            <p>FORMULA: C79H116N4O64X</p>
            <p>CHARGE: 0</p>
          </body>
        </notes>
      </species>
      <species id="M_hs_pre9_c" name="heparan sulfate, precursor 9" compartment="c" hasOnlySubstanceUnits="false" boundaryCondition="false" constant="false">
        <notes>
          <body xmlns="http://www.w3.org/1999/xhtml">
            <p>FORMULA: C87H129N5O69X</p>
            <p>CHARGE: 0</p>
          </body>
        </notes>
      </species>
      <species id="M_hspg_c" name="heparan sulfate proteoglycan" compartment="c" hasOnlySubstanceUnits="false" boundaryCondition="false" constant="false">
        <notes>
          <body xmlns="http://www.w3.org/1999/xhtml">
            <p>FORMULA: C79H113N5O101S12X</p>
            <p>CHARGE: 0</p>
          </body>
        </notes>
      </species>
      <species id="M_hspg_e" name="heparan sulfate proteoglycan" compartment="e" hasOnlySubstanceUnits="false" boundaryCondition="false" constant="false">
        <notes>
          <body xmlns="http://www.w3.org/1999/xhtml">
            <p>FORMULA: C79H113N5O101S12X</p>
            <p>CHARGE: 0</p>
          </body>
        </notes>
      </species>
      <species id="M_htaxol_c" name="hydroxylated taxol" compartment="c" hasOnlySubstanceUnits="false" boundaryCondition="false" constant="false">
        <notes>
          <body xmlns="http://www.w3.org/1999/xhtml">
            <p>FORMULA: C47H31NO15</p>
            <p>CHARGE: 0</p>
          </body>
        </notes>
      </species>
      <species id="M_htaxol_e" name="hydroxylated taxol" compartment="e" hasOnlySubstanceUnits="false" boundaryCondition="false" constant="false">
        <notes>
          <body xmlns="http://www.w3.org/1999/xhtml">
            <p>FORMULA: C47H31NO15</p>
            <p>CHARGE: 0</p>
          </body>
        </notes>
      </species>
      <species id="M_hxan_c" name="Hypoxanthine" compartment="c" hasOnlySubstanceUnits="false" boundaryCondition="false" constant="false">
        <notes>
          <body xmlns="http://www.w3.org/1999/xhtml">
            <p>FORMULA: C5H4N4O</p>
            <p>CHARGE: 0</p>
          </body>
        </notes>
      </species>
      <species id="M_hxan_e" name="Hypoxanthine" compartment="e" hasOnlySubstanceUnits="false" boundaryCondition="false" constant="false">
        <notes>
          <body xmlns="http://www.w3.org/1999/xhtml">
            <p>FORMULA: C5H4N4O</p>
            <p>CHARGE: 0</p>
          </body>
        </notes>
      </species>
      <species id="M_hxdcal_c" name="Hexadecanal" compartment="c" hasOnlySubstanceUnits="false" boundaryCondition="false" constant="false">
        <notes>
          <body xmlns="http://www.w3.org/1999/xhtml">
            <p>FORMULA: C16H32O</p>
            <p>CHARGE: 0</p>
          </body>
        </notes>
      </species>
      <species id="M_hyptaur_c" name="Hypotaurine" compartment="c" hasOnlySubstanceUnits="false" boundaryCondition="false" constant="false">
        <notes>
          <body xmlns="http://www.w3.org/1999/xhtml">
            <p>FORMULA: C2H6NO2S</p>
            <p>CHARGE: 0</p>
          </body>
        </notes>
      </species>
      <species id="M_i_c" name="Iodide" compartment="c" hasOnlySubstanceUnits="false" boundaryCondition="false" constant="false">
        <notes>
          <body xmlns="http://www.w3.org/1999/xhtml">
            <p>FORMULA: I</p>
            <p>CHARGE: 0</p>
          </body>
        </notes>
      </species>
      <species id="M_i_e" name="Iodide" compartment="e" hasOnlySubstanceUnits="false" boundaryCondition="false" constant="false">
        <notes>
          <body xmlns="http://www.w3.org/1999/xhtml">
            <p>FORMULA: I</p>
            <p>CHARGE: 0</p>
          </body>
        </notes>
      </species>
      <species id="M_ibcoa_c" name="Isobutyryl-CoA" compartment="c" hasOnlySubstanceUnits="false" boundaryCondition="false" constant="false">
        <notes>
          <body xmlns="http://www.w3.org/1999/xhtml">
            <p>FORMULA: C25H38N7O17P3S</p>
            <p>CHARGE: 0</p>
          </body>
        </notes>
      </species>
      <species id="M_icit_c" name="Isocitrate" compartment="c" hasOnlySubstanceUnits="false" boundaryCondition="false" constant="false">
        <notes>
          <body xmlns="http://www.w3.org/1999/xhtml">
            <p>FORMULA: C6H5O7</p>
            <p>CHARGE: 0</p>
          </body>
        </notes>
      </species>
      <species id="M_id3acald_c" name="Indole-3-acetaldehyde" compartment="c" hasOnlySubstanceUnits="false" boundaryCondition="false" constant="false">
        <notes>
          <body xmlns="http://www.w3.org/1999/xhtml">
            <p>FORMULA: C10H9NO</p>
            <p>CHARGE: 0</p>
          </body>
        </notes>
      </species>
      <species id="M_idour_c" name="L-Iduronate" compartment="c" hasOnlySubstanceUnits="false" boundaryCondition="false" constant="false">
        <notes>
          <body xmlns="http://www.w3.org/1999/xhtml">
            <p>FORMULA: C6H9O7</p>
            <p>CHARGE: 0</p>
          </body>
        </notes>
      </species>
      <species id="M_idp_c" name="IDP" compartment="c" hasOnlySubstanceUnits="false" boundaryCondition="false" constant="false">
        <notes>
          <body xmlns="http://www.w3.org/1999/xhtml">
            <p>FORMULA: C10H11N4O11P2</p>
            <p>CHARGE: 0</p>
          </body>
        </notes>
      </species>
      <species id="M_idp_e" name="IDP" compartment="e" hasOnlySubstanceUnits="false" boundaryCondition="false" constant="false">
        <notes>
          <body xmlns="http://www.w3.org/1999/xhtml">
            <p>FORMULA: C10H11N4O11P2</p>
            <p>CHARGE: 0</p>
          </body>
        </notes>
      </species>
      <species id="M_ile_DASH_L_c" name="L-Isoleucine" compartment="c" hasOnlySubstanceUnits="false" boundaryCondition="false" constant="false">
        <notes>
          <body xmlns="http://www.w3.org/1999/xhtml">
            <p>FORMULA: C6H13NO2</p>
            <p>CHARGE: 0</p>
          </body>
        </notes>
      </species>
      <species id="M_ile_DASH_L_e" name="L-Isoleucine" compartment="e" hasOnlySubstanceUnits="false" boundaryCondition="false" constant="false">
        <notes>
          <body xmlns="http://www.w3.org/1999/xhtml">
            <p>FORMULA: C6H13NO2</p>
            <p>CHARGE: 0</p>
          </body>
        </notes>
      </species>
      <species id="M_im4ac_c" name="Imidazole-4-acetate" compartment="c" hasOnlySubstanceUnits="false" boundaryCondition="false" constant="false">
        <notes>
          <body xmlns="http://www.w3.org/1999/xhtml">
            <p>FORMULA: C5H5N2O2</p>
            <p>CHARGE: 0</p>
          </body>
        </notes>
      </species>
      <species id="M_im4act_c" name="Imidazole-4-acetaldehyde" compartment="c" hasOnlySubstanceUnits="false" boundaryCondition="false" constant="false">
        <notes>
          <body xmlns="http://www.w3.org/1999/xhtml">
            <p>FORMULA: C5H6N2O</p>
            <p>CHARGE: 0</p>
          </body>
        </notes>
      </species>
      <species id="M_imp_c" name="IMP" compartment="c" hasOnlySubstanceUnits="false" boundaryCondition="false" constant="false">
        <notes>
          <body xmlns="http://www.w3.org/1999/xhtml">
            <p>FORMULA: C10H11N4O8P</p>
            <p>CHARGE: 0</p>
          </body>
        </notes>
      </species>
      <species id="M_imp_e" name="IMP" compartment="e" hasOnlySubstanceUnits="false" boundaryCondition="false" constant="false">
        <notes>
          <body xmlns="http://www.w3.org/1999/xhtml">
            <p>FORMULA: C10H11N4O8P</p>
            <p>CHARGE: 0</p>
          </body>
        </notes>
      </species>
      <species id="M_ind3ac_c" name="Indole-3-acetate" compartment="c" hasOnlySubstanceUnits="false" boundaryCondition="false" constant="false">
        <notes>
          <body xmlns="http://www.w3.org/1999/xhtml">
            <p>FORMULA: C10H8NO2</p>
            <p>CHARGE: 0</p>
          </body>
        </notes>
      </species>
      <species id="M_inost_c" name="myo-Inositol" compartment="c" hasOnlySubstanceUnits="false" boundaryCondition="false" constant="false">
        <notes>
          <body xmlns="http://www.w3.org/1999/xhtml">
            <p>FORMULA: C6H12O6</p>
            <p>CHARGE: 0</p>
          </body>
        </notes>
      </species>
      <species id="M_inost_e" name="myo-Inositol" compartment="e" hasOnlySubstanceUnits="false" boundaryCondition="false" constant="false">
        <notes>
          <body xmlns="http://www.w3.org/1999/xhtml">
            <p>FORMULA: C6H12O6</p>
            <p>CHARGE: 0</p>
          </body>
        </notes>
      </species>
      <species id="M_ins_c" name="Inosine" compartment="c" hasOnlySubstanceUnits="false" boundaryCondition="false" constant="false">
        <notes>
          <body xmlns="http://www.w3.org/1999/xhtml">
            <p>FORMULA: C10H12N4O5</p>
            <p>CHARGE: 0</p>
          </body>
        </notes>
      </species>
      <species id="M_ins_e" name="Inosine" compartment="e" hasOnlySubstanceUnits="false" boundaryCondition="false" constant="false">
        <notes>
          <body xmlns="http://www.w3.org/1999/xhtml">
            <p>FORMULA: C10H12N4O5</p>
            <p>CHARGE: 0</p>
          </body>
        </notes>
      </species>
      <species id="M_iodine_c" name="Iodine" compartment="c" hasOnlySubstanceUnits="false" boundaryCondition="false" constant="false">
        <notes>
          <body xmlns="http://www.w3.org/1999/xhtml">
            <p>FORMULA: I2</p>
            <p>CHARGE: 0</p>
          </body>
        </notes>
      </species>
      <species id="M_ipdp_c" name="Isopentenyl diphosphate" compartment="c" hasOnlySubstanceUnits="false" boundaryCondition="false" constant="false">
        <notes>
          <body xmlns="http://www.w3.org/1999/xhtml">
            <p>FORMULA: C5H9O7P2</p>
            <p>CHARGE: 0</p>
          </body>
        </notes>
      </species>
      <species id="M_itaccoa_c" name="Itaconyl-CoA" compartment="c" hasOnlySubstanceUnits="false" boundaryCondition="false" constant="false">
        <notes>
          <body xmlns="http://www.w3.org/1999/xhtml">
            <p>FORMULA: C26H35N7O19P3S</p>
            <p>CHARGE: 0</p>
          </body>
        </notes>
      </species>
      <species id="M_itacon_c" name="Itaconate" compartment="c" hasOnlySubstanceUnits="false" boundaryCondition="false" constant="false">
        <notes>
          <body xmlns="http://www.w3.org/1999/xhtml">
            <p>FORMULA: C5H4O4</p>
            <p>CHARGE: 0</p>
          </body>
        </notes>
      </species>
      <species id="M_itp_c" name="ITP" compartment="c" hasOnlySubstanceUnits="false" boundaryCondition="false" constant="false">
        <notes>
          <body xmlns="http://www.w3.org/1999/xhtml">
            <p>FORMULA: C10H11N4O14P3</p>
            <p>CHARGE: 0</p>
          </body>
        </notes>
      </species>
      <species id="M_ivcoa_c" name="Isovaleryl-CoA" compartment="c" hasOnlySubstanceUnits="false" boundaryCondition="false" constant="false">
        <notes>
          <body xmlns="http://www.w3.org/1999/xhtml">
            <p>FORMULA: C26H40N7O17P3S</p>
            <p>CHARGE: 0</p>
          </body>
        </notes>
      </species>
      <species id="M_k_c" name="potassium" compartment="c" hasOnlySubstanceUnits="false" boundaryCondition="false" constant="false">
        <notes>
          <body xmlns="http://www.w3.org/1999/xhtml">
            <p>FORMULA: K</p>
[truncated: 4,662,400 more chars]
