# Supplementary material for: Reconstruction and Analysis of Human Kidney-Specific Metabolic Network Based on Omics Data
Source: Hindawi journal article supplement (doi:10.1155/2013/187509), 2013-01-01
Supplement: f1 [file 187509.f1.zip › Table S1.xls]

## Sheet: kidney_Biomarker_mets
Table S1. Predicted metabolic biomarkers for kidney related disease using kidney metabolic model. The disease related enzymes correpond to OMIM_disese types, and the predicted biomarkers correspond to mets records in kidney model file.
Disease Genes	Predicted Biomarkers	OMIM_DISEASE
3242	34hpp; hgentis; 2hyoxplac; phpyr	Hawkinsinuria,Tyrosinemia, type III,
4598	5pmev; adp; atp; mev-R	Common variants at 30 loci contribute to polygenic dyslipidemia,Hyper-IgD syndrome,Mevalonic aciduria,Mevalonicaciduria,Newly identified loci that influence lipid concentrations and risk of coronary artery disease,
875	cyst-L; hcys-L; ser-L; selcyst; selhcys	Homocystinuria, B6-responsive and nonresponsive types,Thrombosis, hyperhomocysteinemic.
353	ade; amp; ppi; prpp	Urolithiasis, 2,8-dihydroxyadenine.
30	3odcoa; accoa; coa; occoa; 3oddcoa; dcacoa; 3otdcoa; ddcacoa; 3ohdcoa; tdcoa; 3ohodcoa; pmtcoa; 3ohxccoa; ttccoa; h2o2; nad; nadh; stcoa; strdnccoa; arachcoa; adrncoa; arachdcoa; lgnccoa; nrvnccoa; odecoa; tettet6coa; clpndcoa; tetpent3coa; dcsptn1coa; tetpent6coa; c226coa; tethex3coa; hexccoa; dmnoncoa; ppcoa; pristcoa	Pseudo-Zellweger syndrome.
56913	T_antigen; Tn_antigen; udp; udpgal	Genome-wide association analysis of susceptibility and clinical phenotype in multiple sclerosis.
95	ac; acorn; orn	Aminoacylase 1 deficiency.
3291	cortsn; crtsl; nad; nadh	Apparent mineralocorticoid excess, hypertension due to,Hypertension, mild low-renin.
116285	amp; atp; btcoa; but; coa; ppi	Genomewide association for schizophrenia in the CATIE study: results of stage 1.
2108	etfox; etfrd; fad; fadh2	Glutaricaciduria, type IIA.
6519	Lcystin; ser-L; lys-L; na1	Cystinuria,Homozygous 2p16 deletion syndrome.
2525	fuc14galacglcgalgluside_hs; galacglcgalgluside_hs; gdp; gdpfuc; acngalacglcgalgluside_hs; fucacngalacglcgalgluside_hs; acgalfucgalacglcgalgluside_hs; fucacgalfucgalacglcgalgluside_hs; fucfucgalacglcgalgluside_hs; fucgalacglcgalgluside_hs; fucgalfucgalacglcgalgluside_hs; galfucgalacglcgalgluside_hs	Blood group, Lewis.
11181	glc-D; tre	Trehalase deficiency.
1610	ala-D; h2o2; nh4; pyr; 5g2oxpt; arg-D; 5a2opntn; orn-D; 1p2cbxl; pro-D	Schizophrenia.
6524	glc-D; glc-D	Renal glucosuria.
6309	chlstol; ddsmsterol; nadp; nadph; 7dhchsterol; lthstrl	Lathosterolosis.
1586	17ahprgnlone; nadp; nadph; prgnlone; acald; dhea; 17ahprgstrn; prgstrn; andrstndn	17,20-lyase deficiency, isolated,17-alpha-hydroxylase/17,20-lyase deficiency.
224	nad; nadh; prist; pristanal	Sjogren-Larsson syndrome.
1644	34dhphe; dopa; 3hxkynam; hLkynr; 5htrp; srtn; 5hxkyn; 5hxkynam; trp-L; trypta; peamn; phe-L; tym; tyr-L	Aromatic L-amino acid decarboxylase deficiency.
56052	chito2pdol_L; gdp; gdpmann; mpdol_L; chito2pdol_U; mpdol_U	Congenital disorder of glycosylation, type Ik.
3156	coa; hmgcoa; mev-R; nadp; nadph	Common SNPs in HMGCR in Micronesians and Whites Associated With LDL-Cholesterol Levels Affect Alternative Splicing of Exon13,Common variants at 30 loci contribute to polygenic dyslipidemia,Loci influencing lipid levels and coronary heart disease risk in 16 European population cohorts,Low density lipoprotein cholesterol level QTL 3,Six new loci associated with blood low-density lipoprotein cholest…
1545	estradiol; hestratriol; nadp; nadph	Glaucoma 3A, primary congenital,Glaucoma, early-onset, digenic,Glaucoma, primary open angle, adult-onset,Glaucoma, primary open angle, juvenile-onset,Peters anomaly.
189	ala-L; hpyr; pyr; ser-L	Hyperoxaluria, primary, type 1.
6647	h2o2; o2s	Amyotrophic lateral sclerosis, due to SOD1 deficiency.
412	dhea; dheas; so4; estrone; estrones; chsterol; chsterols; prgnlone; prgnlones	Ichthyosis, X-linked,Placental steroid sulfatase deficiency.
7941	ac; ak2lgchol_hs; paf_hs	Asthma, susceptibility to,Atopy, susceptibility to,Platelet-activating factor acetylhydrolase deficiency.
6559	cl; na1	Gitelman syndrome.
8540	Rtotal; akdhap_hs; alkylR1oh	Rhizomelic chondrodysplasia punctata, type 3.
6342	coa; dgcholcoa; dhocholoylcoa; ppcoa; dcholcoa; dhcholestancoa; cholcoa; cholcoaone	Leukoencephalopathy with dystonia and motor neuropathy
27235	3dphb; 4hbz; decdp; ppi	Coenzyme Q10 deficiency
3295	nadp; nadph; zym_int2; zymst; dhocholoylcoa; thcholoylcoa; cholcoads; cholcoaone; accoa; coa; dmnoncoa; h2o2; nad; nadh; ppcoa; pristcoa	D-bifunctional protein deficiency
5264	akg; phyt2ohcoa; phytcoa; succ	Refsum disease
847	acald; etoh; h2o2;	Acatalasemia
9380	glx; glyclt; nadp; nadph; glyc-R; hpyr; lald-D; mthgxl	Hyperoxaluria, primary, type II.
2110	etfox; etfrd; q10; q10h2	Glutaricaciduria, type IIC.
1594	1a25dhvitd2; 25hvitd2; nadp; nadph; 1a25dhvitd3; 25hvitd3	vitamin D-dependent rickets type I,Vitamin D-dependent rickets, type I.
1584	11docrtstrn; crtstrn; nadp; nadph; 11docrtsl; crtsl	Adrenal hyperplasia, congenital, due to 11-beta-hydroxylase deficiency,Aldosteronism, glucocorticoid-remediable.
3176	ahcys; amet; hista; mhista	Asthma
5740	prostgh2; prostgi2	Hypertension, essential.
8443	Rtotalcoa; adhap_hs; coa; dhap	Chondrodysplasia punctata, rhizomelic, type 2.
5959	nad; nadh; retinal-cis-9; retinol-9-cis; retinal-11-cis; retinol-cis-11; retinal-cis-13; retinol-cis-13	Fundus albipunctatus.
11136	Lcystin; ser-L	Cystinuria, type II,Cystinuria, type III.
15	Nacsertn; accoa; coa; srtn	Delayed sleep phase syndrome
23417	accoa; malcoa; mmcoa-S; ppcoa	Malonyl-CoA decarboxylase deficiency.
5476	gal; ksi_deg26; ksi_deg27; ksi_deg29; ksi_deg30; ksi_deg32; ksi_deg33; ksi_deg35; ksi_deg36; ksi_deg38; ksi_deg39; ksi_deg40; ksi_deg41; ksii_core2_deg2; ksii_core2_deg3; ksii_core2_deg5; ksii_core2_deg6; ksii_core2_deg8; ksii_core2_deg9; core6; f1a; l2n2m2mn; n2m2mn; ksii_core4_deg2; ksii_core4_deg3; ksi_deg5; ksi_deg6; ksi_deg8; ksi_deg9; ksi_deg11; ksi_deg12; ksi_deg14; ksi_deg15; ksi_deg17; k…	Galactosialidosis
2717	digalside_hs; gal; galside_hs	Fabry disease,Fabry disease, cardiac variant.
229	dhap; glyald; tag1p-D	Fructose intolerance.
19	adp; atp; chsterol; chsterol; pi	Common variants at 30 loci contribute to polygenic dyslipidemia,Coronary artery disease in familial hypercholesterolemia, protection against,HDL deficiency, familial,HDL deficiency, type 2,high density lipoprotein deficiency, Tangier type, 1,Loci influencing lipid levels and coronary heart disease risk in 16 European population cohorts,Newly identified loci that influence lipid concentrations and…
5172	cl; for; i	Deafness, autosomal recessive 4,Enlarged vestibular aqueduct,Pendred syndrome.
7498	nad; nadh; urate; xan; h2o2; hxan	Xanthinuria, type I.
