# Supplementary material for: Reconstruction and Analysis of Human Kidney-Specific Metabolic Network Based on Omics Data
Source: Hindawi journal article supplement (doi:10.1155/2013/187509), 2013-01-01
Supplement: f1 [file 187509.f1.zip › Table S2.xls]

## Sheet: KS_reaction
Table S2.The involved reaction information of kidney-specific genes in kidney-specific metabolic network
gene	gene_symbol	reaction_abbreviation	reaction_name	equation	subsystem	compartment	ecnumber	reversible	translocation	notes
10786	SLC17A3	PIt7ir	phosphate transport in/out via three Na+ symporter (irreversible)	(3) na1[e] + pi[e] --> (3) na1[c] + pi[c]	Transport, Extracellular	Extra-organism, Cytosol		Irreversible	Y	The 3:1 ratio Na to Pi is from tentative data gathered for the type II transporter, which is NOT SLC17A1!! The ratio for the type I transporter (SLC17A1-4) is not known.////From PMID 8815811://The calculated Hill coefficients of these interactions suggest a 3:l coupling ratio of Na vs Pi. The discrepancy of the coupling ratio of 2 1, as derived from Pi transport studies in brush-border membrane v…
11136	Slc7a9(solute carrier family 7)	CYSTSERex	L-cystine/glycine exchanger (cystine in)	Lcystin[e] + ser-L[c] --> Lcystin[c] + ser-L[e]	Transport, Extracellular	Extra-organism, Cytosol		Irreversible	Y	Heterologous co-expression of rBAT and b0,+AT//induces Na+-independent, high-affinity transport of L-cystine and cationic amino acids, and slightly lower affinity transport of neutral amino acids, by an obligatory exchange mechanism [8, 13, 47]. Under physiological conditions, luminal L-cystine and the cationic amino acids are taken up preferentially because of their high apparent extracellular a…
		AMY2e	alpha-amylase, extracellular (glygn2 -> glygn4)	[e] : glygn2 + (8) h2o --> (8) glc-D + glygn4	Starch and Sucrose Metabolism	Extra-organism	3.2.1.1	Irreversible	N	276, 277, 278://-salivary gland [RefSeq]////279, 280://-produced in pancreas, secreted in sm intestine [RefSeq]////6519://- heterodimer with the amino acid transport protein SLC7A9 [UniProt]//- function inferred from sequence similarity (BLOCKS domain)////6520://- function inferred from sequence similarity (BLOCKS domain)
		AMY1e	alpha-amylase, extracellular (strch1 -> strch2)	[e] : (8) h2o + strch1 --> (8) glc-D + strch2	Starch and Sucrose Metabolism	Extra-organism	3.2.1.1	Irreversible	N	276, 277, 278://-salivary gland [RefSeq]////279, 280://-produced in pancreas, secreted in sm intestine [RefSeq]////6519://- heterodimer with the amino acid transport protein SLC7A9 [UniProt]//- function inferred from sequence similarity (BLOCKS domain)////6520://- function inferred from sequence similarity (BLOCKS domain)////
1594	CYP27B1(cytochrome P450, family 27, subfamily B, polypeptide 1)	25VITD2Hm	1-alpha-Vitamin D-25-hydroxylase (D2)	[m] : 25hvitd2 + h + nadph + o2 --> 1a25dhvitd2 + h2o + nadp	Vitamin D	Mitochondria		Irreversible	N	This reaction takes place in kidney////based on Vitamins, G.F.M. Ball,2004, Blackwell publishing, 1st ed (book) pg.196 ////this form is the biological acitve hormon//(25-70pg/ml blood)//IT//is produced if ca2+ or pi i needed (regulated by these compounds concentration)
		25VITD3Hm	1-alpha-Vitamin D-25-hydroxylase (D3)	[m] : 25hvitd3 + h + nadph + o2 --> 1a25dhvitd3 + h2o + nadp	Vitamin D	Mitochondria		Irreversible	N	This reaction takes place in kidney////based on Vitamins, G.F.M. Ball,2004, Blackwell publishing, 1st ed (book) pg.196 ////this form is the biological acitve hormon (25-70pg/ml blood)//IT//is produced if ca2+ or pi i needed (regulated by these compounds concentration)
159963	SLC5A12(solute carrier family 5)	GLCt4	glucose transport via sodium symport	glc-D[e] + na1[e] <==> glc-D[c] + na1[c]	Transport, Extracellular	Extra-organism, Cytosol		Reversible	Y	6524://- cloned [Wells 1992]//- transports Glc/Na+ (low affinity) at a 1:1 ratio [Kanai 1994]//- renal cortex [Wright 2001]//- major transporter involved in reabsorption of glc from glomrtular filtrate [Van de Heuvel 2002]////6526://- cloned [Kwon 1992], [Berry 1995]//- kidney, brain, placenta, pancreas, heart, skeletal muscle, lung [Berry 1995]//- Na+/myo-inositol cotransport; also transports ot…
1644	ddc(dopa decarboxylase)	3HLYTCL	3-Hydroxy-L-tyrosine carboxy-lyase	[c] : 34dhphe + h --> co2 + dopa	Tyrosine metabolism	Cytosol	4.1.1.28	Irreversible	N	Textbook reaction.
		TYRCBOX	L-Tyrosine carboxy-lyase	[c] : h + tyr-L --> co2 + tym	Tyrosine metabolism	Cytosol	4.1.1.25	Irreversible	N	Textbook reaction.
		3HXKYNDCL	3-Hydroxykynurenamine decarboxy-lyase	[c] : h + hLkynr --> 3hxkynam + co2	Tryptophan metabolism	Cytosol	4.1.1	Irreversible	N	Included based on KEGG maps and the fact that this enzyme is established to carry out very similar transformations.
		PHYCBOXL	L-Phenylalanine carboxy-lyase	[c] : h + phe-L --> co2 + peamn	Phenylalanine metabolism	Cytosol	4.1.1.28	Irreversible	N	KEGG map indicates this reaction, DDC does very similar reactions, and this fills a gap.
		LTDCL	L-Tryptophan decarboxy-lyase	[c] : h + trp-L --> co2 + trypta	Tryptophan metabolism	Cytosol	4.1.1.28	Irreversible	N	Citation suggests that this reaction produces tryptamine in minute quantities. The biochemical characterization is specific to the brain.
		HISDC	histidine decarboxylase	[c] : h + his-L --> co2 + hista	Histidine Metabolism	Cytosol	4.1.1.22	Irreversible	N	Textbook reaction.
		5HLTDL	5-Hydroxy-L-tryptophan decarboxy-lyase	[c] : 5htrp + h --> co2 + srtn	Tryptophan metabolism	Cytosol	4.1.1.28	Irreversible	N	Gene and enzyme characterized.
		5HXKYNDCL	5-Hydroxykynurenamine decarboxy-lyase	[c] : 5hxkyn + h --> 5hxkynam + co2	Tryptophan metabolism	Cytosol	4.1.1.28	Irreversible	N	Included based on KEGG maps and the fact that this enzyme is established to carry out very similar transformations.
2348	FOLR1(folate receptor 1)	5MTHFt	5-Methyltetrahydrofolate transport via receptor binding and protolysis	5mthf[e] <==> 5mthf[c]	Transport, Extracellular	Extra-organism, Cytosol		Reversible	Y	I do not know if and which other folate derivates might be transported by this folate receptor.////IT////Morshed et al, 1997, showed that transport by FolR is bidirectional in tubule cells. However, it is thought that in general this transport is unidirectional into cytoplasm (Suh et al 2001).
50617	ATP6V0A4(ATPase, H+ transporting, lysosomal V0 subunit a4)	ATPasel	V-type ATPase, H+ transporting, lysosomal	atp[c] + (3) h[c] + h2o[c] --> adp[c] + (4) h[l] + pi[c]	Transport, Lysosomal	Cytosol, Lysosome	3.6.3.14	Irreversible	Y	Added by RS/DK////- ATP is converted to ADP in the cytosol; this drives the protons from the cytosol into the lumen of the lysosome (See Figure 1 in Eskelinen, et al.)////- Mechanism of lysosomal V-type ATPase is thought to be similar to F-type ATPSynthase of the mitochondrion. (See Forgac)////- "The V-ATPase is composed of a peripheral V1 domain responsible for ATP hydrolysis and an integral V0 …
5105	PCK1(phosphoenolpyruvate carboxykinase 1 (soluble))	PEPCK	Phosphoenolpyruvate carboxykinase (GTP)	[c] : gtp + oaa --> co2 + gdp + pep	Glycolysis/Gluconeogenesis	Cytosol	4.1.1.32	Irreversible	N	cytosolic [RefSeq], [UniProt]//- found in liver, kidney, and intestine, NOT sk muscle, heart, or brain [Orten, Human Biochem 1975]
525	atp6v1b1(ATPase, H+ transporting, lysosomal 56/58kDa, V1 subunit B1)	ATPasel	V-type ATPase, H+ transporting, lysosomal	atp[c] + (3) h[c] + h2o[c] --> adp[c] + (4) h[l] + pi[c]	Transport, Lysosomal	Cytosol, Lysosome	3.6.3.14	Irreversible	Y	Added by RS/DK////- ATP is converted to ADP in the cytosol; this drives the protons from the cytosol into the lumen of the lysosome (See Figure 1 in Eskelinen, et al.)////- Mechanism of lysosomal V-type ATPase is thought to be similar to F-type ATPSynthase of the mitochondrion. (See Forgac)////- "The V-ATPase is composed of a peripheral V1 domain responsible for ATP hydrolysis and an integral V0 …
58510	PRODH2(proline dehydrogenase (oxidase)0	PROD2	Proline dehydrogenase	[c] : fad + pro-L --> 1pyr5c + fadh2 + h	Arginine and Proline Metabolism	Cytosol	1.5.99.8	Irreversible	N	unclear which acceptors are used for this reaction (NADPH specifically excluded at this point because it would cause a loop that could turn NADH into NADPH)//(right now a loop can turn NADH into FADH2 which should be okay)
		PRO1x	proline oxidase (L-proline, NAD)	[c] : nad + pro-L --> 1pyr5c + (2) h + nadh	Arginine and Proline Metabolism	Cytosol	1.5.1.2	Irreversible	N	unclear which acceptors are used for this reaction (NADPH specifically excluded at this point because it would cause a loop that could turn NADH into NADPH)//(right now a loop can turn NADH into FADH2 which should be okay)
635	bhmT(betaine-homocysteine methyltransferase)	BHMT	betaine-homocysteine S-methyltransferase	[c] : glyb + hcys-L --> dmgly + met-L	Glycine, Serine, and Threonine Metabolism	Cytosol	2.1.1.5	Irreversible	N	Entrez Gene - Betaine-homocysteine methyltransferase is a cytosolic enzyme that catalyzes the conversion of betaine and homocysteine to dimethylglycine and methionine, respectively. Defects in BHMT could lead to hyperhomocyst(e)inemia,but such a defect has not yet been observed.
64849	Slc13a3(solute carrier family 13)	SUCCt4_3	succinate transport via sodium symport	(3) na1[e] + succ[e] <==> (3) na1[c] + succ[c]	Transport, Extracellular	Extra-organism, Cytosol		Reversible	Y	64849://- cloned [Wang 2000]//- high affinty cotransport of Na+ w/ succinate, dimethylsuccinate, aKG [Wang 2000]//- basolateral membrane of renal proximal tubular epithelial cells, sinusoidal membrane of hepatocytes, and brain synaptosome [Pajor 1999]//- high in kidney, also in placenta, brain, liver, pancreas [Wang 2000]//- Na(+)-to-succinate stoichiometry is 3:1 [Wang 2000]
		AKGt4_3	AKG transport via sodium symport	akg[e] + (3) na1[e] <==> akg[c] + (3) na1[c]	Transport, Extracellular	Extra-organism, Cytosol		Reversible	Y	64849://- cloned [Wang 2000]//- high affinty cotransport of Na+ w/ succinate, dimethylsuccinate, aKG [Wang 2000]//- basolateral membrane of renal proximal tubular epithelial cells, sinusoidal membrane of hepatocytes, and brain synaptosome [Pajor 1999]//- high in kidney, also in placenta, brain, liver, pancreas [Wang 2000]//- Na(+)-to-succinate stoichiometry is 3:1 [Wang 2000]
6524	SLC5A2(solute carrier family 5)	GLCt4	glucose transport via sodium symport	glc-D[e] + na1[e] <==> glc-D[c] + na1[c]	Transport, Extracellular	Extra-organism, Cytosol		Reversible	Y	6524://- cloned [Wells 1992]//- transports Glc/Na+ (low affinity) at a 1:1 ratio [Kanai 1994]//- renal cortex [Wright 2001]//- major transporter involved in reabsorption of glc from glomrtular filtrate [Van de Heuvel 2002]////6526://- cloned [Kwon 1992], [Berry 1995]//- kidney, brain, placenta, pancreas, heart, skeletal muscle, lung [Berry 1995]//- Na+/myo-inositol cotransport; also transports ot…
		GLCt2r	D-glucose transport in via proton symport	glc-D[e] + h[e] <==> glc-D[c] + h[c]	Transport, Extracellular	Extra-organism, Cytosol		Reversible	Y
6540	SLC6A13(solute carrier family 6)	ABUTt4(2)r	4-aminobutyrate reversible transport in via sodium symport (1:2)	4abut[e] + (2) na1[e] <==> 4abut[c] + (2) na1[c]	Transport, Extracellular	Extra-organism, Cytosol		Reversible	Y	From PMID 12719981:////The SLC6 family is a diverse set of transporters//that mediate solute translocation across cell plasma//membranes by coupling solute transport to the cotransport of sodium and chloride down their electrochemical gradients. These transporters probably have 12 transmembrane domains, with cytoplasmic N- and C-terminal tails, and at least some may function as homo-oligomers. Fa…
6555	SLC10A2 Homo sapiens solute carrier family 10)	GCHOLAt2	glycocholate transport via sodium cotransport	gchola[e] + (2) na1[e] --> gchola[c] + (2) na1[c]	Transport, Extracellular	Extra-organism, Cytosol		Irreversible	Y	SLC10A1: liver pancreas//SLC10A2: ileum, kidney, biliary tract//other SLC transporters (A3, A4, A5) have not been biochemically characterized for substrates & cotransporters. ////SLC10 review in PMID: 12851823////Only SLC10A1 is known to also have estrone-3-sulfate transport capabilites. Only unidirectional (uptake) activity has been shown. See CHOLATEt/GCHOLAt/TCHOLAt for bile acid excretion aci…
		CHOLATEt2	cholate transport via sodium cotransport	cholate[e] + (2) na1[e] --> cholate[c] + (2) na1[c]	Transport, Extracellular	Extra-organism, Cytosol		Irreversible	Y	SLC10A1: liver pancreas//SLC10A2: ileum, kidney, biliary tract//other SLC transporters (A3, A4, A5) have not been biochemically characterized for substrates & cotransporters. ////SLC10 review in PMID: 12851823////Only SLC10A1 is known to also have estrone-3-sulfate transport capabilites. Only unidirectional (uptake) activity has been shown. See CHOLATEt/GCHOLAt/TCHOLAt for bile acid excretion aci…
		TCHOLAt2	taurocholate transport via sodium cotransport	(2) na1[e] + tchola[e] --> (2) na1[c] + tchola[c]	Transport, Extracellular	Extra-organism, Cytosol		Irreversible	Y	SLC10A1: liver pancreas//SLC10A2: ileum, kidney, biliary tract//other SLC transporters (A3, A4, A5) have not been biochemically characterized for substrates & cotransporters. ////SLC10 review in PMID: 12851823////Only SLC10A1 is known to also have estrone-3-sulfate transport capabilites. Only unidirectional (uptake) activity has been shown. See CHOLATEt/GCHOLAt/TCHOLAt for bile acid excretion aci…
6557	SLC12A1(solute carrier family 12)	NKCC2t	Na+-K+-Cl- cotransport (NH4+)	(2) cl[e] + na1[e] + nh4[e] <==> (2) cl[c] + na1[c] + nh4[c]	Transport, Extracellular	Extra-organism, Cytosol		Reversible	Y	- NKCC1, NKCC2, KCC1, KCC3, KCC4 shown to transport NH4+ in place of K+ [Bergeron 2003]////6557://- kidney-specific; apical membrane of the thick ascending limb of Henle's loop and the macula densa [Entrez Gene], [Hebert 2004]//- accounts for most of the
		NKCCt	Na+-K+-Cl- cotransport	(2) cl[e] + k[e] + na1[e] <==> (2) cl[c] + k[c] + na1[c]	Transport, Extracellular	Extra-organism, Cytosol		Reversible	Y	- NKCC1, NKCC2, KCC1, KCC3, KCC4 shown to transport NH4+ in place of K+ [Bergeron 2003]////6557://- kidney-specific; apical membrane of the thick ascending limb of Henle's loop and the macula densa [Entrez Gene], [Hebert 2004]//- accounts for most of the
6559	SLC12A3(solute carrier family 12)	NCCt	Na+-Cl- cotransport	cl[e] + na1[e] --> cl[c] + na1[c]	Transport, Extracellular	Extra-organism, Cytosol		Irreversible	Y	6559://- major salt reabsorption pathway in apical membrane of distal convoluted tubule [Hebert 2004]//- kidney [Mastroianni 1996], [Chang 1996], lower in sm intestine, placenta, prostate, colon, spleen [Chang 1996]//- cloned [Simon 1996], [Mastroianni 1996], [Chang 1996]//- predominantly expressed in kidney [Hebert 2004]//- 1:1 stoiciometry of Na+-Cl- transport [Hebert 2001]
6561	SLC13A1(solute carrier family 13)	SO4t4_3	sulfate transport via sodium symport	(3) na1[e] + so4[e] <==> (3) na1[c] + so4[c]	Transport, Extracellular	Extra-organism, Cytosol		Reversible	Y	6561://- cloned [Lee 2000]//- ortholog cotransports sulfate, thiosulfate, selenate with Na+; molybdate, tungstate are also competitively transported but not included in model [Lee 2000]//- kidney [Lee 2000]//- 3 Na+:1 anion stoichiometry [Pajor 2000]
		SELt4_3	selenate transport via sodium symport	(3) na1[e] + sel[e] <==> (3) na1[c] + sel[c]	Transport, Extracellular	Extra-organism, Cytosol		Reversible	Y	6561://- cloned [Lee 2000]//- ortholog cotransports sulfate, thiosulfate, selenate with Na+; molybdate, tungstate are also competitively transported but not included in model [Lee 2000]//- kidney [Lee 2000]//- 3 Na+:1 anion stoichiometry [Pajor 2000]
		TSULt4_3	thiosulfate transport via sodium symport	(3) na1[e] + tsul[e] <==> (3) na1[c] + tsul[c]	Transport, Extracellular	Extra-organism, Cytosol		Reversible	Y	6561://- cloned [Lee 2000]//- ortholog cotransports sulfate, thiosulfate, selenate with Na+; molybdate, tungstate are also competitively transported but not included in model [Lee 2000]//- kidney [Lee 2000]//- 3 Na+:1 anion stoichiometry [Pajor 2000]
6568	Slc17a1(solute carrier family 17)	PIt7ir	phosphate transport in/out via three Na+ symporter (irreversible)	(3) na1[e] + pi[e] --> (3) na1[c] + pi[c]	Transport, Extracellular	Extra-organism, Cytosol		Irreversible	Y	The 3:1 ratio Na to Pi is from tentative data gathered for the type II transporter, which is NOT SLC17A1!! The ratio for the type I transporter (SLC17A1-4) is not known.////From PMID 8815811://The calculated Hill coefficients of these interactions suggest a 3:l coupling ratio of Na vs Pi. The discrepancy of the coupling ratio of 2 1, as derived from Pi transport studies in brush-border membrane v…
6569	SLC34A1(solute carrier family 34)	PIt7	phosphate transport in/out via three Na+ symporter	(3) na1[e] + pi[e] <==> (3) na1[c] + pi[c]	Transport, Extracellular	Extra-organism, Cytosol		Reversible	Y	- A1 and A2 transporters are electrogenic w/ probably 3:1 Na:Pi cotransport////MM
6582	slc22a2(solute carrier family 22)	PROSTGF2t	prostaglandin uniport	prostgf2[e] <==> prostgf2[c]	Transport, Extracellular	Extra-organism, Cytosol		Reversible	Y	Tissue specificity: kidney (basolat membrane of prox tub), brain////Km and Ki listed in Koepsell 2003 (in addition to detailed info about localization and other members of organic cation transporters) PMID: 12827517 ////cloning in PMID 9187257 ////Polyspecific organic cation transporters in the liver, kidney, intestine, and other organs are critical for elimination of many endogenous small organi…
		DOPAtu	Dopamine uniport	dopa[e] <==> dopa[c]	Transport, Extracellular	Extra-organism, Cytosol		Reversible	Y	Transporters of the SLC22 family function in different ways: (1) as uniporters that mediate facilitated diffusion in either direction (OCTs), (2) as anion exchangers (OAT1, OAT3 and URAT1), and (3) as Na+/l-carnitine cotransporter (OCTN2). They//participate in the absorption and/or excretion of drugs, xenobiotics, and endogenous compounds in intestine, liver and/or kidney, and perform homeostatic…
		CHOLtu	Choline uniport	chol[e] <==> chol[c]	Transport, Extracellular	Extra-organism, Cytosol		Reversible	Y	Transporters of the SLC22 family function in different ways: (1) as uniporters that mediate facilitated diffusion in either direction (OCTs), (2) as anion exchangers (OAT1, OAT3 and URAT1), and (3) as Na+/l-carnitine cotransporter (OCTN2). They//participate in the absorption and/or excretion of drugs, xenobiotics, and endogenous compounds in intestine, liver and/or kidney, and perform homeostatic…
		DEBRISOQUINEt	debrisoquine uniport	debrisoquine[e] <==> debrisoquine[c]	Transport, Extracellular	Extra-organism, Cytosol		Reversible	Y	Tissue specificity: kidney (basolat membrane of prox tub), brain////Km and Ki listed in Koepsell 2003 (in addition to detailed info about localization and other members of organic cation transporters) PMID: 12827517 ////cloning in PMID 9187257 ////Polyspecific organic cation transporters in the liver, kidney, intestine, and other organs are critical for elimination of many endogenous small organi…
		HISTAtu	Histamine uniport	hista[e] <==> hista[c]	Transport, Extracellular	Extra-organism, Cytosol		Reversible	Y	Transporters of the SLC22 family function in different ways: (1) as uniporters that mediate facilitated diffusion in either direction (OCTs), (2) as anion exchangers (OAT1, OAT3 and URAT1), and (3) as Na+/l-carnitine cotransporter (OCTN2). They//participate in the absorption and/or excretion of drugs, xenobiotics, and endogenous compounds in intestine, liver and/or kidney, and perform homeostatic…
		NRPPHRtu	Norepinephrine uniport	nrpphr[e] <==> nrpphr[c]	Transport, Extracellular	Extra-organism, Cytosol		Reversible	Y	Transporters of the SLC22 family function in different ways: (1) as uniporters that mediate facilitated diffusion in either direction (OCTs), (2) as anion exchangers (OAT1, OAT3 and URAT1), and (3) as Na+/l-carnitine cotransporter (OCTN2). They//participate in the absorption and/or excretion of drugs, xenobiotics, and endogenous compounds in intestine, liver and/or kidney, and perform homeostatic…
		SRTNtu	Serotonin uniport	srtn[e] <==> srtn[c]	Transport, Extracellular	Extra-organism, Cytosol		Reversible	Y	Transporters of the SLC22 family function in different ways: (1) as uniporters that mediate facilitated diffusion in either direction (OCTs), (2) as anion exchangers (OAT1, OAT3 and URAT1), and (3) as Na+/l-carnitine cotransporter (OCTN2). They//participate in the absorption and/or excretion of drugs, xenobiotics, and endogenous compounds in intestine, liver and/or kidney, and perform homeostatic…
		PROSTGE2t2	prostaglandin uniport	prostge2[e] <==> prostge2[c]	Transport, Extracellular	Extra-organism, Cytosol		Reversible	Y	Tissue specificity: kidney (basolat membrane of prox tub), brain////Km and Ki listed in Koepsell 2003 (in addition to detailed info about localization and other members of organic cation transporters) PMID: 12827517 ////cloning in PMID 9187257 ////Polyspecific organic cation transporters in the liver, kidney, intestine, and other organs are critical for elimination of many endogenous small organi…
79623	Galnt14(UDP-N-acetyl-alpha-D-galactosamine:polypeptide N-acetylgalactosaminyltransferase 140	GALNTg	GalNAc transferase, Golgi apparatus	[g] : Ser/Thr + udpacgal --> Tn_antigen + h + udp	O-Glycan Biosynthesis	Golgi Apparatus	2.4.1.41	Irreversible	N	GalNAc-Ts initiate mucin-type O-linked glycosylation in the Golgi apparatus by catalyzing the transfer of GalNAc to serine and threonine residues on target proteins. They are characterized by an N-terminal transmembrane domain, a stem region, a lumenal catalytic domain containing a GT1 motif and Gal/GalNAc transferase motif, and a C-terminal ricin/lectin-like domain. GalNAc-Ts have different, but…
8424	BBOX1(butyrobetaine (gamma), 2-oxoglutarate dioxygenase)	BBHOX	4-Trimethylammoniobutanoate,2-oxoglutarate:oxygen oxidoreductase (3-hydroxylating)	[c] : 4tmeabutn + akg + o2 --> co2 + crn + succ	Lysine Metabolism	Cytosol		Irreversible	N
9154		ADNt4	adenosine transport (Na/Adn cotransport)	adn[e] + na1[e] --> adn[c] + na1[c]	Transport, Extracellular	Extra-organism, Cytosol		Irreversible	Y	IT//Tissue distribution:////SLC28A1 (CNT1): Liver, kidney, small intestine, (epitheloa apical membrane)////SLC28A2 (CNT2): kidney (apical membrane), liver, heart, brain, plcaenta, pancreas, skeletal muscle, colon, rectum, small intestine////SLC28A3 (CNT3): pancreas, trachea, bone marrow and mammary gland, intestine, lung, placenta, prostrate, testis, liver
		URIt4	uridine transport in via sodium symport	na1[e] + uri[e] --> na1[c] + uri[c]	Transport, Extracellular	Extra-organism, Cytosol		Irreversible	Y	IT//Tissue distribution:////SLC28A1 (CNT1): Liver, kidney, small intestine, (epitheloa apical membrane)////SLC28A2 (CNT2): kidney (apical membrane), liver, heart, brain, plcaenta, pancreas, skeletal muscle, colon, rectum, small intestine////SLC28A3 (CNT3): pancreas, trachea, bone marrow and mammary gland, intestine, lung, placenta, prostrate, testis, liver
		THMDt4	thymidine transport in via sodium symport	na1[e] + thymd[e] --> na1[c] + thymd[c]	Transport, Extracellular	Extra-organism, Cytosol		Irreversible	Y	IT//Tissue distribution:////SLC28A1 (CNT1): Liver, kidney, small intestine, (epitheloa apical membrane)////SLC28A2 (CNT2): kidney (apical membrane), liver, heart, brain, plcaenta, pancreas, skeletal muscle, colon, rectum, small intestine////SLC28A3 (CNT3): pancreas, trachea, bone marrow and mammary gland, intestine, lung, placenta, prostrate, testis, liver
		CYTDt4	cytidine transport in via sodium symport	cytd[e] + na1[e] --> cytd[c] + na1[c]	Transport, Extracellular	Extra-organism, Cytosol		Irreversible	Y	IT//Tissue distribution:////SLC28A1 (CNT1): Liver, kidney, small intestine, (epitheloa apical membrane)////SLC28A2 (CNT2): kidney (apical membrane), liver, heart, brain, plcaenta, pancreas, skeletal muscle, colon, rectum, small intestine////SLC28A3 (CNT3): pancreas, trachea, bone marrow and mammary gland, intestine, lung, placenta, prostrate, testis, liver

## Sheet: Sheet3
10786
11136
1594
159963
1644
2348
50617
5105
525
58510
635
64849
6524
6540
6555
6557
6559
6561
6568
6569
6582
79623
8424
9154
