# Supplementary material for: Reconstruction and Analysis of Human Kidney-Specific Metabolic Network Based on Omics Data
Source: Hindawi journal article supplement (doi:10.1155/2013/187509), 2013-01-01
Supplement: f1 [file 187509.f1.zip › Table S3.xls]

## Sheet: kidney_heart_0.01
Table. S2. Gene clusters and the corresponding significantly enriched GO categories obtained from BINGO.
Testing option : Use whole annotation as reference set
Selected statistical test : Hypergeometric test
Selected correction : Benjamini & Hochberg False Discovery Rate (FDR) correction
Selected significance level : 0.01
Testing option : Use whole annotation as reference set
GO-ID	p-value	Gene-num	Description	Genes in test set
55114	1.7847e-15	20	oxidation reduction	6716|1571|6715|3242|3081|1757|9415|1584|58510|1581|26002|11283|1591|9023|7166|121278|8288|1558|1621|1551
44281	2.9197e-12	23	small molecule metabolic process	3251|2356|3242|3081|15|189|51005|1757|9415|58510|51251|1581|26002|11283|1591|9023|7166|1635|121278|1558|3795|1621|438
6725	2.3308e-11	10	cellular aromatic compound metabolic process	3251|26002|7166|3242|2356|121278|3081|15|1621|438
6082	1.3749e-10	15	organic acid metabolic process	2356|3242|3081|189|9415|1757|58510|1581|11283|26002|9023|7166|121278|1558|1621
8152	2.3667e-10	40	metabolic process	1571|9514|3242|2356|2629|3081|15|51005|6820|4248|84002|9415|58510|51251|1581|9023|162466|7166|8288|2525|3795|1621|438|6716|3251|57733|6715|9615|10317|189|1757|1584|26002|11283|1591|27159|1635|121278|1558|1551
44237	2.9514e-10	37	cellular metabolic process	1571|9514|3242|2356|2629|3081|15|51005|6820|4248|84002|9415|58510|51251|1581|9023|7166|8288|2525|3795|1621|438|6716|3251|57733|6715|9615|10317|189|1757|1584|26002|11283|1591|1635|121278|1558
46219	4.666e-10	4	indolalkylamine biosynthetic process	7166|121278|15|438
42435	4.666e-10	4	indole derivative biosynthetic process	7166|121278|15|438
19752	1.3656e-09	14	carboxylic acid metabolic process	2356|3242|3081|189|9415|1757|58510|1581|11283|26002|9023|7166|121278|1621
43436	1.3656e-09	14	oxoacid metabolic process	2356|3242|3081|189|9415|1757|58510|1581|11283|26002|9023|7166|121278|1621
42180	1.8761e-09	14	cellular ketone metabolic process	2356|3242|3081|189|9415|1757|58510|1581|11283|26002|9023|7166|121278|1621
44106	2.7202e-09	11	cellular amine metabolic process	58510|26002|7166|3242|121278|3081|15|189|1621|1757|438
9308	4.1012e-09	12	amine metabolic process	58510|26002|27159|7166|3242|121278|3081|15|189|1621|1757|438
46483	6.727e-09	11	heterocycle metabolic process	58510|3251|26002|1571|7166|2356|1635|121278|15|1621|438
9309	9.7988e-09	7	amine biosynthetic process	58510|7166|121278|15|189|1621|438
44249	1.0454e-08	21	cellular biosynthetic process	6716|3251|6715|9514|2356|10317|15|189|4248|1584|9415|84002|58510|1581|9023|7166|1635|121278|2525|1621|438
44283	1.0549e-08	12	small molecule biosynthetic process	58510|3251|1581|9023|7166|1635|121278|15|189|1621|438|9415
44238	1.2478e-08	36	primary metabolic process	1571|9514|3242|2356|2629|3081|15|51005|6820|4248|84002|9415|58510|51251|1581|9023|7166|2525|3795|1621|438|6716|3251|6715|57733|9615|10317|189|1757|1584|26002|11283|1591|27159|1635|121278
6519	1.5378e-08	11	cellular amino acid and derivative metabolic process	58510|26002|7166|3242|121278|3081|15|189|1621|1757|438
9058	3.2301e-08	21	biosynthetic process	6716|3251|6715|9514|2356|10317|15|189|4248|1584|9415|84002|58510|1581|9023|7166|1635|121278|2525|1621|438
6520	4.0312e-08	9	cellular amino acid metabolic process	58510|26002|7166|3242|121278|3081|189|1621|1757
42446	5.1858e-08	5	hormone biosynthetic process	6716|6715|15|1584|438
6586	6.5481e-08	4	indolalkylamine metabolic process	7166|121278|15|438
42430	6.5481e-08	4	indole and derivative metabolic process	7166|121278|15|438
42434	6.5481e-08	4	indole derivative metabolic process	7166|121278|15|438
42401	8.3001e-08	5	cellular biogenic amine biosynthetic process	7166|121278|15|1621|438
9063	8.8549e-08	6	cellular amino acid catabolic process	58510|26002|3242|3081|1621|1757
6629	1.9579e-07	14	lipid metabolic process	6716|9514|1571|6715|57733|2629|6820|9415|84002|1584|1581|11283|1591|9023
9310	1.9813e-07	6	amine catabolic process	58510|26002|3242|3081|1621|1757
8202	2.8344e-07	8	steroid metabolic process	6716|1581|1591|6715|1571|9023|6820|1584
9072	3.5e-07	4	aromatic amino acid family metabolic process	7166|3242|121278|3081
6576	5.8817e-07	6	cellular biogenic amine metabolic process	26002|7166|121278|15|1621|438
44271	7.9828e-07	9	cellular nitrogen compound biosynthetic process	58510|3251|7166|1635|121278|15|189|1621|438
42398	1.3154e-06	5	cellular amino acid derivative biosynthetic process	7166|121278|15|1621|438
18130	1.5511e-06	5	heterocycle biosynthetic process	3251|7166|121278|15|438
16054	1.983e-06	6	organic acid catabolic process	58510|26002|3242|3081|1621|1757
46395	1.983e-06	6	carboxylic acid catabolic process	58510|26002|3242|3081|1621|1757
34754	2.1217e-06	5	cellular hormone metabolic process	6716|6715|15|1584|438
5975	4.7877e-06	10	carbohydrate metabolic process	57733|9514|27159|2629|2525|10317|3795|51005|4248|84002
6694	7.4417e-06	5	steroid biosynthetic process	6716|1581|6715|9023|1584
42427	1.0115e-05	2	serotonin biosynthetic process	7166|121278
9056	1.0903e-05	13	catabolic process	6716|57733|3242|3081|1757|58510|1581|1591|26002|27159|8288|1558|1621
8610	1.1363e-05	8	lipid biosynthetic process	6716|1581|6715|9514|9023|1584|84002|9415
6575	1.8583e-05	6	cellular amino acid derivative metabolic process	26002|7166|121278|15|1621|438
44282	1.9957e-05	7	small molecule catabolic process	58510|26002|1591|3242|3081|1621|1757
44262	2.4828e-05	8	cellular carbohydrate metabolic process	57733|9514|2525|10317|3795|51005|4248|84002
42445	2.6157e-05	5	hormone metabolic process	6716|6715|15|1584|438
30186	3.0283e-05	2	melatonin metabolic process	15|438
30187	3.0283e-05	2	melatonin biosynthetic process	15|438
6486	3.8202e-05	5	protein amino acid glycosylation	9514|2525|10317|4248|84002
43413	3.8202e-05	5	macromolecule glycosylation	9514|2525|10317|4248|84002
70085	3.8202e-05	5	glycosylation	9514|2525|10317|4248|84002
9987	5.1969e-05	42	cellular process	1571|9514|6559|3242|2356|2629|3081|15|23657|51005|6820|4248|9415|84002|58510|51251|1581|9023|7166|6580|8288|2525|3795|1621|438|6716|3251|57733|6715|9615|10317|189|1757|1584|26002|11283|1591|27159|6532|1635|121278|1558
6706	5.2673e-05	3	steroid catabolic process	6716|1581|1591
42428	6.0441e-05	2	serotonin metabolic process	7166|121278
6572	0.00010053	2	tyrosine catabolic process	3242|3081
9101	0.00011491	5	glycoprotein biosynthetic process	9514|2525|10317|4248|84002
6664	0.00011886	3	glycolipid metabolic process	57733|9514|84002
10817	0.00012614	5	regulation of hormone levels	6716|6715|15|1584|438
42221	0.000134	14	response to chemical stimulus	6716|1571|6715|15|23657|189|1581|1591|27159|6532|8288|1558|3795|1621
44248	0.00014278	10	cellular catabolic process	58510|26002|1591|57733|3242|8288|1558|3081|1621|1757
6559	0.00015048	2	L-phenylalanine catabolic process	3242|3081
6558	0.00015048	2	L-phenylalanine metabolic process	3242|3081
6702	0.00015048	2	androgen biosynthetic process	6716|6715
6643	0.00016385	4	membrane lipid metabolic process	57733|9514|2629|84002
16053	0.00016972	5	organic acid biosynthetic process	58510|1581|9023|189|9415
46394	0.00016972	5	carboxylic acid biosynthetic process	58510|1581|9023|189|9415
6807	0.0002764	17	nitrogen compound metabolic process	3251|2356|3242|9615|3081|15|189|1757|58510|51251|26002|27159|7166|1635|121278|1621|438
6677	0.00027975	2	glycosylceramide metabolic process	57733|9514
44255	0.00032552	8	cellular lipid metabolic process	11283|57733|1571|9514|9023|2629|84002|9415
6570	0.00035895	2	tyrosine metabolic process	3242|3081
9100	0.00038019	5	glycoprotein metabolic process	9514|2525|10317|4248|84002
32787	0.00040141	6	monocarboxylic acid metabolic process	1581|11283|9023|2356|189|9415
6548	0.00044776	2	histidine catabolic process	26002|1621
9077	0.00044776	2	histidine family amino acid catabolic process	26002|1621
34641	0.00048318	16	cellular nitrogen compound metabolic process	3251|2356|3242|9615|3081|15|189|1757|58510|51251|26002|7166|1635|121278|1621|438
6547	0.00065404	2	histidine metabolic process	26002|1621
9075	0.00065404	2	histidine family amino acid metabolic process	26002|1621
9074	0.00065404	2	aromatic amino acid family catabolic process	3242|3081
9247	0.00077137	2	glycolipid biosynthetic process	9514|84002
6544	0.00089809	2	glycine metabolic process	189|1757
8209	0.0010341	2	androgen metabolic process	6716|6715

## Sheet: heart_kidney_0.01
Selected statistical test : Hypergeometric test
Selected correction : Benjamini & Hochberg False Discovery Rate (FDR) correction
Selected significance level : 0.01
Testing option : Use whole annotation as reference set
GO-ID	p-value	gene-num	Description	Genes in test set
51186	1.501e-06	5	cofactor metabolic process	2679|2678|210|7167|1431
44281	1.9366e-06	9	small molecule metabolic process	2679|1841|5728|2678|7167|29968|1431|4357|7299
6082	1.4338e-05	6	organic acid metabolic process	2678|7167|29968|1431|4357|7299
6732	1.6072e-05	4	coenzyme metabolic process	2679|2678|7167|1431
6750	5.6132e-05	2	glutathione biosynthetic process	2679|2678
44283	6.6044e-05	5	small molecule biosynthetic process	2679|1841|2678|7167|29968
8272	0.0001069	2	sulfate transport	65010|4357
44249	0.00010999	8	cellular biosynthetic process	2679|1841|2678|210|7167|29968|7299|4249
51188	0.0001377	3	cofactor biosynthetic process	2679|2678|210
5975	0.00014059	5	carbohydrate metabolic process	6120|5728|7167|1431|4249
9058	0.00017306	8	biosynthetic process	2679|1841|2678|210|7167|29968|7299|4249
43043	0.00017367	2	peptide biosynthetic process	2679|2678
19752	0.0002005	5	carboxylic acid metabolic process	2678|7167|29968|1431|7299
43436	0.0002005	5	oxoacid metabolic process	2678|7167|29968|1431|7299
42180	0.00022491	5	cellular ketone metabolic process	2678|7167|29968|1431|7299
6749	0.00035477	2	glutathione metabolic process	2679|2678
8152	0.00044686	13	metabolic process	6120|5728|210|29968|1431|171425|7299|4249|2679|1841|2678|7167|4357
6519	0.0004552	4	cellular amino acid and derivative metabolic process	2679|2678|29968|7299
44237	0.00045888	12	cellular metabolic process	2679|1841|5728|2678|210|7167|29968|1431|171425|4357|7299|4249
44262	0.00053014	4	cellular carbohydrate metabolic process	5728|7167|1431|4249
46148	0.00090389	2	pigment biosynthetic process	210|7299
9197	0.0010485	1	pyrimidine deoxyribonucleoside diphosphate biosynthetic process	1841
9196	0.0010485	1	pyrimidine deoxyribonucleoside diphosphate metabolic process	1841
46072	0.0010485	1	dTDP metabolic process	1841
9139	0.0010485	1	pyrimidine nucleoside diphosphate biosynthetic process	1841
6233	0.0010485	1	dTDP biosynthetic process	1841
15698	0.001221	2	inorganic anion transport	65010|4357
44272	0.001371	2	sulfur compound biosynthetic process	2679|2678
6518	0.0014757	2	peptide metabolic process	2679|2678
42440	0.0015294	2	pigment metabolic process	210|7299
6520	0.0016177	3	cellular amino acid metabolic process	2678|29968|7299
42398	0.0017536	2	cellular amino acid derivative biosynthetic process	2679|2678
9108	0.0020545	2	coenzyme biosynthetic process	2679|2678
6583	0.002096	1	melanin biosynthetic process from tyrosine	7299
19682	0.002096	1	glyceraldehyde-3-phosphate metabolic process	7167
9189	0.002096	1	deoxyribonucleoside diphosphate biosynthetic process	1841
9138	0.002096	1	pyrimidine nucleoside diphosphate metabolic process	1841
9439	0.002096	1	cyanate metabolic process	4357
9440	0.002096	1	cyanate catabolic process	4357
34641	0.0029719	7	cellular nitrogen compound metabolic process	1841|2678|210|7167|29968|4357|7299
6564	0.0031425	1	L-serine biosynthetic process	29968
42816	0.0031425	1	vitamin B6 metabolic process	29968
42819	0.0031425	1	vitamin B6 biosynthetic process	29968
9221	0.0031425	1	pyrimidine deoxyribonucleotide biosynthetic process	1841
50765	0.0031425	1	negative regulation of phagocytosis	5728
8615	0.0031425	1	pyridoxine biosynthetic process	29968
8614	0.0031425	1	pyridoxine metabolic process	29968
44106	0.0037444	3	cellular amine metabolic process	2678|29968|7299
6820	0.0040677	2	anion transport	65010|4357
6807	0.0041012	7	nitrogen compound metabolic process	1841|2678|210|7167|29968|4357|7299
46838	0.0041879	1	phosphorylated carbohydrate dephosphorylation	5728
48069	0.0041879	1	eye pigmentation	7299
46855	0.0041879	1	inositol phosphate dephosphorylation	5728
46856	0.0041879	1	phosphoinositide dephosphorylation	5728
9186	0.0041879	1	deoxyribonucleoside diphosphate metabolic process	1841
43474	0.0041879	1	pigment metabolic process involved in pigmentation	7299
42441	0.0041879	1	eye pigment metabolic process	7299
43324	0.0041879	1	pigment metabolic process involved in developmental pigmentation	7299
6726	0.0041879	1	eye pigment biosynthetic process	7299
44271	0.0043898	3	cellular nitrogen compound biosynthetic process	1841|210|29968
46483	0.004776	3	heterocycle metabolic process	1841|210|29968
9265	0.0052323	1	2'-deoxyribonucleotide biosynthetic process	1841
51895	0.0052323	1	negative regulation of focal adhesion assembly	5728
46839	0.0062757	1	phospholipid dephosphorylation	5728
9133	0.0073181	1	nucleoside diphosphate biosynthetic process	1841
6101	0.0073181	1	citrate metabolic process	1431
2902	0.0073181	1	regulation of B cell apoptosis	5728
6790	0.0073822	2	sulfur metabolic process	2679|2678
9308	0.0081708	3	amine metabolic process	2678|29968|7299
6563	0.0083594	1	L-serine metabolic process	29968
9263	0.0083594	1	deoxyribonucleotide biosynthetic process	1841
51898	0.0083594	1	negative regulation of protein kinase B signaling cascade	5728

## Sheet: kidney_liver_0.01
Selected statistical test : Hypergeometric test
Selected correction : Benjamini & Hochberg False Discovery Rate (FDR) correction
Selected significance level : 0.01
Testing option : Use whole annotation as reference set
GO-ID	p-value	gene-num	Description	Genes in test set
5975	2.4594e-105	139	carbohydrate metabolic process	57171|10402|8534|5373|5372|9245|84002|10690|79087|50614|3340|374907|2650|11320|9653|10610|30815|2651|10331|1798|81849|93010|28|11285|56548|11282|10090|4122|4124|135152|4123|8869|10164|29906|9435|6184|10678|64131|64132|27087|22856|6185|2762|51809|51301|80162|51805|192134|10020|2799|10317|2595|2590|1118|2591|2589|54344|6480|6483|6482|3425|6484|6487|6489|4245|11226|9514|11227|11253|2583|2581|10195|2…
9101	5.3864e-100	87	glycoprotein biosynthetic process	57171|11226|9514|11253|10402|2683|10195|5373|9245|4249|4248|55808|4247|84002|79087|10690|57134|50614|3340|374907|11320|26035|2650|55501|10610|9653|30815|256435|9394|10331|79053|85365|1798|81849|93010|28|56548|1650|11282|4124|8869|29880|55790|7841|29906|2132|222537|2131|6184|79369|10678|64131|22856|55568|6185|1603|51809|51301|8818|55454|8813|2525|9953|2523|10905|192134|8509|10317|50515|2590|2591|2…
9100	1.5997e-96	93	glycoprotein metabolic process	57171|11226|9514|11253|10402|2683|10195|5373|9245|4249|4248|55808|4247|84002|79087|10690|57134|50614|3340|374907|11320|26035|2650|55501|10610|9653|30815|256435|9394|10331|79053|85365|1798|81849|93010|28|11285|56548|1650|11282|4124|8869|29880|55790|6448|7841|29906|2132|222537|79369|2131|6184|10678|64131|4126|22856|55568|6185|1603|51809|51301|8818|55454|175|8813|9951|2525|9953|2523|10905|192134|850…
9058	1.5068e-81	199	biosynthetic process	113451|284098|5373|3284|5372|3283|79087|50614|1583|11320|8424|5740|10610|10331|3294|8733|3293|1589|1588|81849|93010|1586|79814|1585|28|1584|1594|10090|4124|135152|8869|55650|29906|222537|10229|15|5351|55217|22928|8443|54872|10317|128869|2590|2591|2589|10606|6480|6483|6482|6484|6487|6489|4245|11226|11227|2583|2683|3620|23556|4249|4248|4247|2673|26035|55501|438|256435|4258|55907|55790|9487|9488|784…
43413	7.4508e-79	69	macromolecule glycosylation	57171|11226|9514|11253|10402|2683|10195|5373|9245|4249|4248|55808|4247|84002|10690|79087|57134|50614|374907|2650|11320|10610|30815|256435|10331|79053|85365|1798|81849|93010|28|1650|11282|4124|8869|29880|7841|29906|6184|79369|10678|55568|6185|1603|51809|51301|8818|8813|2525|2523|10905|192134|10317|2590|2591|2589|54344|29929|6480|6483|6482|51146|6484|6487|2530|4245|8705|6489|8706
70085	7.4508e-79	69	glycosylation	57171|11226|9514|11253|10402|2683|10195|5373|9245|4249|4248|55808|4247|84002|10690|79087|57134|50614|374907|2650|11320|10610|30815|256435|10331|79053|85365|1798|81849|93010|28|1650|11282|4124|8869|29880|7841|29906|6184|79369|10678|55568|6185|1603|51809|51301|8818|8813|2525|2523|10905|192134|10317|2590|2591|2589|54344|29929|6480|6483|6482|51146|6484|6487|2530|4245|8705|6489|8706
6486	7.4508e-79	69	protein amino acid glycosylation	57171|11226|9514|11253|10402|2683|10195|5373|9245|4249|4248|55808|4247|84002|10690|79087|57134|50614|374907|2650|11320|10610|30815|256435|10331|79053|85365|1798|81849|93010|28|1650|11282|4124|8869|29880|7841|29906|6184|79369|10678|55568|6185|1603|51809|51301|8818|8813|2525|2523|10905|192134|10317|2590|2591|2589|54344|29929|6480|6483|6482|51146|6484|6487|2530|4245|8705|6489|8706
44262	1.633e-74	101	cellular carbohydrate metabolic process	57171|10402|8534|5373|5372|9245|84002|10690|79087|50614|374907|2650|11320|9653|10610|30815|10331|1798|81849|93010|28|56548|11282|4122|4124|4123|8869|10164|29906|9435|6184|10678|6185|2762|51809|51301|51805|192134|10020|10317|2590|2591|2589|54344|6480|6483|3425|6482|6484|6487|6489|4245|11226|9514|11253|10195|2683|4249|55808|4248|27235|4247|57134|2673|11041|256435|57733|79053|11181|85365|1650|5973|2…
8152	1.2756e-67	319	metabolic process	113451|10999|284098|5373|3284|5372|54490|3283|1312|79087|50614|1583|11320|8424|5740|8879|10610|8875|8876|10331|8733|3294|3293|1589|1588|81849|93010|1586|79814|1585|28|79813|1584|8310|1594|1591|10090|4122|4121|4124|135152|4123|8869|55650|29906|222537|318|10229|27087|15|5352|5351|55217|175|22928|410|8443|411|112483|54872|129807|10317|2595|128869|2590|2591|2589|10606|6480|6483|23382|6482|6484|6487|4…
44249	2.0981e-67	178	cellular biosynthetic process	57171|9453|51227|113451|2643|284098|10402|5373|51004|5372|3283|9245|84002|79087|10690|50614|3340|1583|374907|2650|11320|8424|5740|10610|9653|53947|30815|10331|8733|1798|81849|1586|93010|28|1585|79814|1584|56548|1594|11282|471|6697|4124|79896|8869|55650|29906|222537|6184|10678|10229|64131|15|22856|5351|6185|94005|55217|2762|51809|51301|22928|51805|8443|5805|192134|84720|54872|55301|10020|10317|496…
44237	3.3591e-52	275	cellular metabolic process	113451|10999|284098|5373|5372|54490|3283|1312|79087|50614|1583|11320|8424|5740|8879|10610|8875|8876|10331|8733|1588|81849|93010|1586|79814|1585|28|79813|1584|8310|1594|1591|10090|4122|4124|4123|8869|55650|29906|222537|318|10229|15|5352|5351|55217|175|22928|410|8443|411|54872|10317|128869|2590|2591|2589|10606|6480|6483|6482|23382|6484|6487|6489|54677|4245|11226|2583|10246|2581|2683|3620|23556|4249…
44238	3.8679e-52	283	primary metabolic process	113451|10999|284098|5373|3284|5372|3283|1312|79087|50614|1583|11320|8424|5740|8879|10610|8875|8876|10331|8733|3294|3293|1589|1588|81849|93010|1586|79814|1585|28|79813|1584|8310|1594|1591|10090|4122|4124|135152|4123|8869|55650|29906|222537|318|10229|27087|15|5352|5351|55217|175|22928|8443|54872|10317|2595|128869|2590|2591|2589|10606|6480|6483|6482|6484|6487|6489|54677|4245|11226|11227|2583|2581|26…
9059	2.8482e-44	118	macromolecule biosynthetic process	57171|51227|284098|10402|5373|9245|84002|10690|79087|50614|3340|374907|2650|11320|9653|10610|30815|2651|10331|8733|1798|81849|93010|28|11285|56548|11282|4124|8869|55650|29906|222537|6184|10678|64131|64132|22856|6185|94005|51809|51301|192134|84720|54872|10020|10317|128869|2590|2591|80055|2589|54344|10026|51604|6480|6483|6482|6484|6487|6489|4245|11226|9514|11227|11253|93183|10195|2683|23556|4249|55…
16051	1.063e-41	45	carbohydrate biosynthetic process	2132|2131|11227|9945|64131|64132|2683|5373|5372|22856|3906|4247|2762|79087|117283|3340|55454|374907|2673|26035|55501|9653|90161|26229|11041|9394|2651|10020|266722|113189|85365|50515|1798|11285|56548|10090|166012|7264|135152|55790|55907|9469|4166|2530|8706
8610	1.1251e-41	69	lipid biosynthetic process	9453|51227|9514|240|284098|2583|93183|3284|3283|23556|27235|84002|79087|1583|5740|242|80142|247|246|8540|53947|30815|3294|8733|3293|1589|1798|1588|4258|1586|1585|1584|239|1594|8869|55907|9487|9488|55650|9489|54965|5277|5279|29906|4048|94005|5281|8818|9091|8813|26301|8443|1543|5283|4056|6716|84720|6715|54872|55301|10020|128869|80055|54344|10026|51604|2687|6916|6489
34645	2.013e-40	112	cellular macromolecule biosynthetic process	57171|51227|284098|10402|5373|9245|84002|10690|79087|50614|3340|374907|2650|11320|9653|10610|30815|10331|8733|1798|81849|93010|28|56548|11282|4124|8869|55650|29906|222537|6184|10678|64131|22856|6185|94005|51809|51301|192134|84720|54872|10020|10317|128869|2590|2591|80055|2589|54344|10026|51604|6480|6483|6482|6484|6487|6489|4245|11226|9514|11253|93183|10195|2683|23556|4249|55808|4248|4247|57134|260…
6629	1.3972e-39	100	lipid metabolic process	9453|51227|10999|284098|10402|3284|3283|1312|84002|79087|1583|5740|8879|8529|53947|8540|30815|8733|3294|3293|1589|1384|1798|1588|1586|1585|1584|8310|1594|11283|1591|10005|11000|8869|55650|29906|9807|94005|1645|8443|84720|54872|55301|10020|128869|80055|54344|51604|10026|1632|6489|54677|9514|240|2583|93183|2581|6820|23556|27235|5264|242|80142|247|246|64781|57733|2717|4258|55268|4259|239|55907|9487|…
44281	1.4778e-35	122	small molecule metabolic process	10999|113451|2643|10402|8534|5373|5372|51004|1312|10690|1583|8424|5740|8879|8528|8529|883|8875|8876|1384|1798|5033|5034|79814|79813|8310|1594|56548|11283|9056|1591|9057|4122|10005|79896|4124|471|11000|4123|873|10164|9435|51022|10229|15|1786|1787|5351|1788|2762|55217|1789|22928|51805|23428|1645|8443|5805|95|55301|10020|26275|496|495|491|492|493|10606|490|1635|6483|23382|1632|54677|240|2683|3620|27…
44255	9.5992e-35	77	cellular lipid metabolic process	9453|51227|10999|9514|240|284098|2583|10402|93183|2581|23556|27235|84002|79087|5740|242|8879|8529|80142|247|246|64781|53947|57733|30815|8733|1384|1798|2717|4258|55268|8310|239|11283|10005|11000|8869|55907|9487|9488|55650|9489|54965|5277|5279|29906|4048|9807|9536|94005|5281|117283|8818|9091|8813|26301|4051|8443|1543|1544|5283|4056|84720|54872|55301|10020|128869|80055|54344|10026|51604|2687|6916|16…
6506	6.7889e-33	25	GPI anchor biosynthetic process	51227|284098|93183|23556|94005|79087|5281|8818|9091|8813|5283|84720|54872|8733|128869|80055|54344|51604|10026|9487|55650|9488|54965|5277|5279
6505	2.3196e-32	25	GPI anchor metabolic process	51227|284098|93183|23556|94005|79087|5281|8818|9091|8813|5283|84720|54872|8733|128869|80055|54344|51604|10026|9487|55650|9488|54965|5277|5279
6487	2.0757e-30	24	protein amino acid N-linked glycosylation	57171|6184|9514|11253|2683|79053|85365|1798|4249|4248|6185|4247|1603|79087|57134|1650|29929|11282|4124|11320|7841|2530|10905|4245
9308	5.6382e-29	61	amine metabolic process	113451|11227|2643|8534|3620|1312|3340|2673|374907|26035|8974|8424|9653|55501|8528|26229|883|438|11041|2651|5033|5034|79814|11285|56548|9056|9057|79896|55790|4166|2132|2131|9945|64131|64132|15|22856|5351|1788|55217|1789|22928|23428|1543|8140|5805|5860|95|26275|5198|2799|50515|1118|51540|166012|2687|6531|27159|64850|5471|9469
46489	1.4335e-28	25	phosphoinositide biosynthetic process	51227|284098|93183|23556|94005|79087|5281|8818|9091|8813|5283|84720|54872|8733|128869|80055|54344|51604|10026|9487|55650|9488|54965|5277|5279
16254	4.125e-26	16	preassembly of GPI anchor in ER membrane	51227|84720|54872|284098|93183|23556|5281|8818|9091|9487|9488|55650|54965|5277|5283|5279
271	6.0076e-26	24	polysaccharide biosynthetic process	2132|2131|11041|11227|64131|2651|64132|10020|22856|50515|11285|56548|3340|166012|55454|374907|55790|26035|55907|9469|55501|9653|4166|26229
6023	1.0191e-25	19	aminoglycan biosynthetic process	2132|2131|11041|11227|64131|2651|64132|22856|50515|11285|56548|166012|374907|26035|55790|9469|55501|4166|26229
6497	1.3462e-25	25	protein amino acid lipidation	51227|284098|93183|23556|94005|79087|5281|8818|9091|8813|5283|84720|54872|8733|128869|80055|54344|51604|10026|9487|55650|9488|54965|5277|5279
42158	2.1474e-24	25	lipoprotein biosynthetic process	51227|284098|93183|23556|94005|79087|5281|8818|9091|8813|5283|84720|54872|8733|128869|80055|54344|51604|10026|9487|55650|9488|54965|5277|5279
6790	4.0469e-24	33	sulfur metabolic process	9435|2132|222537|51022|2131|8534|22856|6820|1788|1789|3340|55454|22928|9951|26035|9953|9653|55501|9394|8509|113189|50515|4258|23563|56548|2687|10090|166012|55790|9469|10164|4166|79178
6029	1.2952e-23	22	proteoglycan metabolic process	222537|2132|2131|9394|64131|8509|113189|22856|50515|11285|56548|166012|3340|55454|9951|55790|26035|9469|9953|6448|55501|9653
30384	1.9296e-23	27	phosphoinositide metabolic process	51227|284098|93183|9807|23556|94005|5281|79087|117283|8818|9091|8813|5283|84720|54872|8733|128869|80055|54344|51604|10026|9487|9488|55650|54965|5277|5279
43412	4.9634e-23	112	macromolecule modification	57171|51227|284098|10402|5373|9245|84002|10690|79087|50614|374907|2650|11320|10610|30815|10331|8733|1798|5033|81849|5034|93010|28|79813|11285|11282|10090|4124|8869|55650|10164|3141|29906|222537|6184|51022|10678|1786|5352|1787|6185|5351|1788|94005|1789|51809|51301|175|192134|84720|54872|10317|128869|2590|2591|80055|2589|54344|10026|51604|6480|6483|6482|6484|6487|6489|4245|11226|9514|11253|93183|10…
6024	9.1257e-23	17	glycosaminoglycan biosynthetic process	2132|2131|11227|64131|2651|64132|22856|50515|11285|56548|166012|26035|55790|9469|55501|4166|26229
6022	9.7873e-23	25	aminoglycan metabolic process	2132|2131|11227|64131|64132|8534|22856|3340|374907|26035|55501|9653|26229|11041|2651|2799|50515|1118|11285|56548|166012|27159|55790|9469|4166
30166	9.9554e-23	18	proteoglycan biosynthetic process	222537|2132|2131|9394|64131|8509|22856|50515|56548|3340|166012|55454|55790|26035|9469|9953|9653|55501
6464	1.1734e-22	108	protein modification process	57171|51227|284098|10402|5373|9245|84002|10690|79087|50614|374907|2650|11320|10610|30815|10331|8733|1798|5033|81849|5034|93010|28|79813|11285|11282|10090|4124|8869|55650|10164|3141|29906|222537|6184|51022|10678|5352|6185|5351|94005|51809|51301|175|192134|84720|54872|10317|128869|2590|2591|80055|2589|54344|10026|51604|6480|6483|6482|6484|6487|6489|4245|11226|9514|11253|93183|10195|2683|23556|4249|…
42180	2.5136e-22	63	cellular ketone metabolic process	10999|240|2643|51004|3620|27235|2673|8974|8424|5740|242|8879|8528|80142|8529|247|246|883|1384|5033|4258|5034|55268|8310|239|9056|11283|9057|10005|79896|11000|55790|873|4048|9945|10229|9536|5351|55217|22928|51805|4051|23428|1645|8443|1543|8140|1544|5805|4056|5860|95|55301|10020|26275|5198|51540|2687|64850|5471|6916|1632|54677
46474	3.5124e-22	25	glycerophospholipid biosynthetic process	51227|284098|93183|23556|94005|79087|5281|8818|9091|8813|5283|84720|54872|8733|128869|80055|54344|51604|10026|9487|55650|9488|54965|5277|5279
45017	2.4355e-21	26	glycerolipid biosynthetic process	51227|284098|93183|23556|94005|79087|5281|8818|9091|8813|8443|5283|84720|54872|8733|128869|80055|54344|51604|10026|9487|9488|55650|54965|5277|5279
42157	2.1942e-20	25	lipoprotein metabolic process	51227|284098|93183|23556|94005|79087|5281|8818|9091|8813|5283|84720|54872|8733|128869|80055|54344|51604|10026|9487|55650|9488|54965|5277|5279
44272	6.1496e-20	21	sulfur compound biosynthetic process	222537|2132|2131|9394|8509|22856|50515|4258|56548|2687|3340|166012|22928|55454|55790|26035|9469|9953|55501|9653|4166
5976	1.0531e-19	28	polysaccharide metabolic process	2132|2131|11227|64131|64132|8534|22856|3340|55454|374907|26035|9653|55501|26229|11041|2651|10020|2799|50515|1118|11285|56548|166012|27159|55907|55790|9469|4166
43436	2.4204e-19	58	oxoacid metabolic process	10999|240|2643|3620|2673|8974|8424|5740|242|8879|8528|80142|8529|247|246|883|1384|5033|4258|5034|55268|8310|239|9056|11283|9057|10005|79896|11000|55790|4048|9945|9536|5351|55217|22928|4051|23428|1645|8443|1543|8140|1544|5805|4056|5860|95|55301|10020|26275|5198|51540|2687|64850|5471|6916|1632|54677
19752	2.4204e-19	58	carboxylic acid metabolic process	10999|240|2643|3620|2673|8974|8424|5740|242|8879|8528|80142|8529|247|246|883|1384|5033|4258|5034|55268|8310|239|9056|11283|9057|10005|79896|11000|55790|4048|9945|9536|5351|55217|22928|4051|23428|1645|8443|1543|8140|1544|5805|4056|5860|95|55301|10020|26275|5198|51540|2687|64850|5471|6916|1632|54677
30203	3.744e-19	21	glycosaminoglycan metabolic process	2132|2131|11227|64131|2651|64132|8534|2799|22856|50515|11285|56548|3340|166012|26035|55790|9469|9653|55501|4166|26229
9311	4.1152e-19	17	oligosaccharide metabolic process	11253|2683|11181|85365|1798|2717|3906|4247|79087|11282|4124|3425|11320|7841|2530|10905|8706
6082	4.3843e-19	58	organic acid metabolic process	10999|240|2643|3620|2673|8974|8424|5740|242|8879|8528|80142|8529|247|246|883|1384|5033|4258|5034|55268|8310|239|9056|11283|9057|10005|79896|11000|55790|4048|9945|9536|5351|55217|22928|4051|23428|1645|8443|1543|8140|1544|5805|4056|5860|95|55301|10020|26275|5198|51540|2687|64850|5471|6916|1632|54677
8654	4.8953e-18	26	phospholipid biosynthetic process	51227|284098|93183|23556|94005|79087|5281|8818|9091|8813|5283|84720|54872|8733|128869|80055|54344|51604|10026|9487|9488|55650|54965|9489|5277|5279
6650	6.9952e-18	27	glycerophospholipid metabolic process	51227|284098|93183|9807|23556|94005|5281|79087|117283|8818|9091|8813|5283|84720|54872|8733|128869|80055|54344|51604|10026|9487|9488|55650|54965|5277|5279
6493	2.1142e-17	15	protein amino acid O-linked glycosylation	11226|9245|55568|2590|2591|50614|2589|54344|51809|8818|51301|8813|2650|51146|192134
6814	5.0664e-17	26	sodium ion transport	6559|246213|10246|8671|57030|6543|125206|57468|9498|57282|9497|57419|6568|57835|6546|389015|159963|6547|6524|25769|496|57084|10786|123041|6553|10050
9987	6.2379e-17	319	cellular process	113451|10999|284098|5373|5372|54490|3283|1312|79087|50614|1583|11320|8424|5740|8879|10610|56913|115019|8875|8876|10331|8733|1588|81849|93010|1586|79814|1585|28|79813|1584|8310|9869|1594|1591|10090|4122|4124|4123|8869|55650|29906|222537|318|10229|15|5352|5351|55217|387893|175|22928|125206|9197|410|8443|411|54872|10317|25769|80854|128869|2590|2591|2589|9187|10606|6480|6483|6482|23382|6484|6487|4245…
15012	1.4756e-16	10	heparan sulfate proteoglycan biosynthetic process	2132|222537|2131|9394|3340|8509|55790|26035|9953|9653
30201	2.8249e-16	11	heparan sulfate proteoglycan metabolic process	2132|222537|2131|9394|3340|8509|9951|55790|26035|9953|9653
44283	1.5839e-15	46	small molecule biosynthetic process	113451|4048|240|2643|5373|5372|15|3620|5351|55217|2762|117283|22928|8424|5740|242|1543|80142|247|246|4056|438|55301|2618|5198|1798|496|4258|495|79814|353|491|239|492|1594|493|2687|6531|5471|471|7264|10606|79896|490|6916|1635
46486	3.7382e-15	28	glycerolipid metabolic process	51227|284098|93183|9807|23556|94005|5281|79087|117283|8818|9091|8813|8443|5283|84720|54872|8733|128869|80055|54344|51604|10026|9487|9488|55650|54965|5277|5279
6664	6.3109e-15	14	glycolipid metabolic process	53947|57733|9514|30815|2583|10402|2581|2717|84002|8869|26301|4668|6489|29906
32787	6.7504e-15	37	monocarboxylic acid metabolic process	10999|4048|240|2643|9536|3620|55217|8974|8424|5740|4051|242|1645|8443|1543|8529|80142|1544|247|246|4056|55301|1384|5033|5034|4258|55268|8310|239|11283|2687|10005|11000|6916|55790|1632|54677
6519	1.8227e-14	40	cellular amino acid and derivative metabolic process	51022|113451|2643|9945|15|3620|1312|5351|55217|1788|1789|22928|2673|8974|8424|8528|23428|1543|8140|5805|883|438|5860|95|8875|8876|26275|5198|5033|5034|4258|79814|51540|9056|2687|9057|6531|64850|5471|79896
44267	3.2653e-14	114	cellular protein metabolic process	57171|51227|284098|10402|5373|9245|84002|10690|79087|50614|90701|374907|2650|11320|10610|30815|10331|8733|1798|5033|81849|5034|93010|28|79813|11285|23478|11282|10090|4124|8869|55650|10164|3141|29906|222537|51022|6184|10678|5352|6185|5351|94005|51809|51301|175|60559|192134|84720|54872|10317|128869|2590|2591|80055|2589|54344|10026|51604|6480|6483|6482|6484|6487|6489|4245|11226|9514|11253|93183|1019…
6690	8.9438e-14	16	icosanoid metabolic process	4048|240|9536|4258|239|11283|2687|6916|5740|4051|242|80142|8529|247|246|4056
33559	2.5083e-13	16	unsaturated fatty acid metabolic process	4048|240|9536|4258|239|11283|2687|6916|5740|4051|242|80142|8529|247|246|4056
6644	3.1915e-13	28	phospholipid metabolic process	51227|284098|93183|9807|23556|94005|5281|79087|117283|8818|9091|8813|5283|84720|54872|8733|128869|80055|54344|51604|10026|9487|9488|55650|54965|9489|5277|5279
6040	6.739e-13	12	amino sugar metabolic process	9435|56548|5973|10402|10020|6483|55790|1798|10164|4166|2135|23563
19637	1.2535e-12	28	organophosphate metabolic process	51227|284098|93183|9807|23556|94005|5281|79087|117283|8818|9091|8813|5283|84720|54872|8733|128869|80055|54344|51604|10026|9487|9488|55650|54965|9489|5277|5279
5996	3.2015e-12	28	monosaccharide metabolic process	9435|9945|10402|8534|2683|5373|5372|2762|10690|2673|8790|2523|10020|1798|23563|56548|5973|4122|7264|4124|4123|6483|9942|55790|10164|2135|2530|4166
9247	3.7211e-12	9	glycolipid biosynthetic process	53947|30815|9514|2583|8869|26301|6489|84002|29906
6691	3.8597e-12	11	leukotriene metabolic process	239|2687|4048|240|4051|242|8529|4258|247|246|4056
43449	6.9582e-12	11	cellular alkene metabolic process	239|2687|4048|240|4051|242|8529|4258|247|246|4056
34637	1.355e-11	16	cellular carbohydrate biosynthetic process	2132|2131|11041|10020|2683|5373|5372|3906|2762|117283|55454|374907|7264|55907|55790|9653
46456	2.0947e-11	12	icosanoid biosynthetic process	239|2687|4048|240|6916|5740|242|4258|80142|247|246|4056
55114	2.4798e-11	49	oxidation reduction	240|3284|51004|3283|3620|2745|1583|8974|5264|8424|8528|242|8529|247|246|6649|3294|1589|3293|1588|5033|1586|1585|1584|8310|1594|239|11283|1591|6697|873|8985|1551|51022|10229|5352|5351|55217|8288|4051|1543|1645|1544|6716|5860|6715|64816|7264|6916
6631	4.9902e-11	26	fatty acid metabolic process	10999|4048|240|9536|5740|4051|8443|242|80142|8529|247|4056|246|55301|1384|4258|55268|8310|239|11283|2687|10005|6916|11000|1632|54677
6636	6.8786e-11	12	unsaturated fatty acid biosynthetic process	239|2687|4048|240|6916|5740|242|4258|80142|247|246|4056
50650	9.9643e-11	8	chondroitin sulfate proteoglycan biosynthetic process	56548|166012|55454|55790|9469|22856|50515|55501
19538	2.2213e-10	119	protein metabolic process	84735|57171|51227|284098|10402|5373|9245|84002|10690|79087|50614|90701|374907|2650|11320|10610|30815|10331|8733|5033|1798|5034|81849|93010|28|79813|11285|23478|11282|10090|4124|8869|55650|10164|3141|29906|222537|51022|6184|10678|10229|5352|6185|5351|94005|51809|51301|175|60559|192134|84720|95|54872|10317|128869|2590|2591|80055|2589|54344|10026|51604|6480|6483|6482|6484|6487|6489|4245|11226|9514|1…
30206	2.9278e-10	7	chondroitin sulfate biosynthetic process	56548|166012|55790|9469|22856|50515|55501
43450	4.176e-10	9	alkene biosynthetic process	239|2687|4048|240|242|4258|247|246|4056
19370	4.176e-10	9	leukotriene biosynthetic process	239|2687|4048|240|242|4258|247|246|4056
9312	5.7704e-10	8	oligosaccharide biosynthetic process	79087|2683|85365|1798|3906|2530|4247|8706
6643	7.3744e-10	16	membrane lipid metabolic process	64781|53947|57733|30815|9514|2583|10402|2581|2717|84002|8869|26301|8879|4668|6489|29906
6044	7.4167e-10	9	N-acetylglucosamine metabolic process	9435|56548|5973|10020|1798|10164|4166|2135|23563
6041	7.4167e-10	9	glucosamine metabolic process	9435|56548|5973|10020|1798|10164|4166|2135|23563
50654	7.4167e-10	9	chondroitin sulfate proteoglycan metabolic process	56548|166012|55454|113189|55790|9469|22856|50515|55501
44106	7.8353e-10	30	cellular amine metabolic process	113451|2643|9945|15|3620|1312|5351|55217|22928|2673|8424|23428|8140|8528|5805|883|438|5860|95|26275|5198|79814|51540|9056|9057|2687|6531|64850|5471|79896
6013	9.538e-10	7	mannose metabolic process	5973|4122|4124|4123|5373|5372|2762
6688	9.538e-10	7	glycosphingolipid biosynthetic process	53947|30815|9514|2583|8869|6489|29906
6066	1.1193e-09	36	alcohol metabolic process	9435|2643|9945|10402|8534|2683|5373|5372|1312|27235|2762|10690|117283|1583|51805|8813|2673|8790|2523|10020|1798|23563|56548|6531|5973|4122|7264|4124|4123|6483|9942|55790|10164|4166|2135|2530
6575	1.1605e-09	22	cellular amino acid derivative metabolic process	51022|113451|8875|2643|8876|15|5033|3620|5034|4258|1312|79814|55217|1788|1789|2687|6531|8974|8424|1543|438|883
16255	2.2402e-09	6	attachment of GPI anchor to protein	80055|10026|51604|8733|128869|94005
6687	3.3634e-09	9	glycosphingolipid metabolic process	53947|30815|9514|2583|2581|8869|2717|6489|29906
15672	5.2146e-09	27	monovalent inorganic cation transport	6559|246213|10246|8671|57030|6543|125206|57468|9498|57282|9497|57419|6568|57835|6546|389015|159963|6547|6524|25769|496|495|57084|10786|123041|6553|10050
44260	7.743e-09	142	cellular macromolecule metabolic process	57171|51227|284098|10402|5373|9245|84002|10690|79087|50614|3340|90701|374907|2650|11320|9653|10610|30815|10331|8733|5033|1798|5034|81849|93010|28|79813|11285|56548|23478|10090|11282|4124|8869|55650|10164|3141|29906|222537|51022|6184|10678|64131|22856|5352|1786|5351|6185|1787|94005|1788|1789|51809|51301|175|60559|192134|84720|54872|10020|10317|128869|2590|2591|80055|2589|54344|10026|51604|6480|648…
33692	1.1987e-08	9	cellular polysaccharide biosynthetic process	2132|11041|2131|55454|374907|10020|55790|55907|9653
34754	1.4343e-08	13	cellular hormone metabolic process	6716|6715|15|3283|1588|1312|1586|1585|1584|1583|7363|1543|438
43170	1.6275e-08	156	macromolecule metabolic process	57171|84735|51227|284098|10402|8534|5373|9245|84002|10690|79087|50614|3340|90701|374907|2650|11320|9653|10610|30815|2651|10331|8733|5033|1798|5034|81849|93010|28|79813|11285|56548|23478|10090|11282|4124|8869|55650|10164|3141|29906|222537|51022|6184|10678|10229|64131|64132|22856|5352|1786|5351|6185|1787|94005|1788|1789|51809|51301|175|60559|192134|84720|95|54872|10020|2799|10317|128869|2590|1118|2…
9225	2.4888e-08	7	nucleotide-sugar metabolic process	7264|10020|55790|5373|1798|2135|2762
30001	2.7262e-08	33	metal ion transport	246213|6559|10246|8671|57030|6543|125206|57468|9498|57282|9497|57419|6568|57835|389015|6546|159963|6547|6524|25769|496|495|491|492|1594|493|57084|9187|490|10786|123041|6553|10050
8202	3.2736e-08	22	steroid metabolic process	6716|6715|3294|1589|3284|3293|1588|3283|1312|6820|1586|1585|1584|8310|1594|1591|1583|7363|1645|1543|1544|7367
6725	4.6044e-08	18	cellular aromatic compound metabolic process	5860|2643|2618|15|3620|1312|1788|1789|353|6531|5471|6697|10606|1543|1544|5805|79178|438
30204	7.9244e-08	7	chondroitin sulfate metabolic process	56548|166012|55790|9469|22856|50515|55501
42446	9.35e-08	9	hormone biosynthetic process	6716|1583|6715|15|3283|1586|1585|1584|438
44271	1.6891e-07	27	cellular nitrogen compound biosynthetic process	113451|2643|15|5351|55217|22928|8424|5805|438|5860|2618|5198|496|495|79814|491|353|492|493|6531|5471|79896|10606|6697|471|490|1635
46483	3.0937e-07	27	heterocycle metabolic process	2643|15|3620|8974|1543|1544|5805|438|5860|2618|5198|5033|5034|496|495|491|353|492|493|5471|10606|6697|471|490|1635|65220|79178
6694	3.2914e-07	13	steroid biosynthetic process	6716|6715|3294|3284|3293|1589|3283|1588|1586|1585|1584|1594|1583
46467	3.6892e-07	9	membrane lipid biosynthetic process	53947|30815|9514|2583|8869|26301|6489|84002|29906
6633	3.786e-07	13	fatty acid biosynthetic process	4048|240|55301|4258|239|2687|6916|5740|242|80142|247|4056|246
15014	4.7991e-07	4	heparan sulfate proteoglycan biosynthetic process, polysaccharide chain biosynthetic process	2132|2131|55790|9653
46040	4.7991e-07	4	IMP metabolic process	471|10606|2618|5198
6188	4.7991e-07	4	IMP biosynthetic process	471|10606|2618|5198
15698	5.8946e-07	10	inorganic anion transport	6568|57835|115019|115111|284129|57282|5172|9497|116369|57030
6491	6.5798e-07	5	N-glycan processing	11282|4124|11320|2530|10905
6812	8.0837e-07	34	cation transport	246213|6559|10246|8671|57030|6543|125206|57468|9498|57282|6581|9497|57419|6568|57835|389015|6546|159963|6547|6524|25769|496|495|491|492|1594|493|57084|9187|490|10786|123041|6553|10050
6520	8.0892e-07	21	cellular amino acid metabolic process	5860|95|9945|26275|5198|3620|5351|51540|9056|2687|9057|64850|5471|22928|79896|2673|8528|23428|8140|5805|883
6665	1.0105e-06	12	sphingolipid metabolic process	64781|53947|57733|30815|9514|2583|2581|8869|2717|8879|6489|29906
42445	1.1703e-06	14	hormone metabolic process	6716|6715|15|3283|1588|1312|1586|1585|1584|1583|7363|8528|1543|438
6807	1.3857e-06	93	nitrogen compound metabolic process	113451|11227|2643|8534|5373|3620|1312|3340|374907|2673|26035|8974|8424|8528|55501|8879|9653|26229|438|883|11041|8875|8876|2651|6839|2618|5033|1798|5034|79814|11285|56548|9056|9057|471|6697|79896|55790|4166|2132|51022|3704|2131|318|9945|64131|55350|64132|15|22856|1786|5351|1787|55217|2762|1788|1789|51251|22928|23428|1543|8140|1544|5805|5860|95|10020|26275|5198|2799|50515|496|495|1118|51540|353|491…
6465	1.4483e-06	5	signal peptide processing	23478|28972|90701|9789|60559
16053	1.4824e-06	17	organic acid biosynthetic process	4048|240|55301|3620|4258|5351|239|2687|22928|79896|6916|5740|242|80142|247|246|4056
46394	1.4824e-06	17	carboxylic acid biosynthetic process	4048|240|55301|3620|4258|5351|239|2687|22928|79896|6916|5740|242|80142|247|246|4056
6836	1.7378e-06	12	neurotransmitter transport	6540|140679|57084|9152|6531|246213|6530|6536|6572|6529|6538|57030
5984	2.3494e-06	4	disaccharide metabolic process	2683|11181|3425|3906
50655	2.3494e-06	4	dermatan sulfate proteoglycan metabolic process	55454|113189|55790|55501
42401	2.7796e-06	8	cellular biogenic amine biosynthetic process	113451|6531|2643|15|8424|55217|79814|438
18279	2.8338e-06	5	protein amino acid N-linked glycosylation via asparagine	1650|6184|6185|4247|1603
18196	2.8338e-06	5	peptidyl-asparagine modification	1650|6184|6185|4247|1603
6004	3.1627e-06	6	fucose metabolic process	10690|7264|8790|2523|2530|2762
42398	3.4197e-06	10	cellular amino acid derivative biosynthetic process	113451|2687|6531|2643|15|8424|4258|55217|79814|438
42354	5.0828e-06	5	L-fucose metabolic process	10690|7264|2523|2530|2762
6820	5.2578e-06	12	anion transport	6522|6568|6521|57835|115019|115111|284129|57282|5172|9497|116369|57030
6477	6.9008e-06	4	protein amino acid sulfation	222537|10090|10164|23563
6729	6.9008e-06	4	tetrahydrobiopterin biosynthetic process	5860|2643|6697|5805
15701	6.9008e-06	4	bicarbonate transport	57835|115111|57282|9497
55085	7.9174e-06	34	transmembrane transport	246213|6559|10246|57030|6543|125206|57468|6581|8140|23428|57419|6568|10057|115019|389015|6546|115111|159963|6547|6524|25769|5172|495|9056|57084|9057|9187|284129|10786|123041|6553|6572|116369|10050
6811	8.2569e-06	41	ion transport	246213|6559|10246|8671|57030|6522|6521|6543|125206|57468|9498|57282|6581|9497|57419|6568|57835|115019|389015|6546|115111|159963|6547|6524|25769|5172|496|495|491|492|1594|493|57084|9187|284129|490|10786|123041|6553|116369|10050
44264	1.0606e-05	9	cellular polysaccharide metabolic process	2132|11041|2131|55454|374907|10020|55790|55907|9653
9309	1.5699e-05	11	amine biosynthetic process	113451|6531|2643|22928|79896|15|8424|5351|55217|79814|438
42359	1.5765e-05	4	vitamin D metabolic process	1594|1591|1583|1543
46146	1.5765e-05	4	tetrahydrobiopterin metabolic process	5860|2643|6697|5805
35269	1.8304e-05	3	protein amino acid O-linked mannosylation	54344|8818|8813
35268	1.8304e-05	3	protein amino acid mannosylation	54344|8818|8813
18401	1.8304e-05	3	peptidyl-proline hydroxylation to 4-hydroxy-L-proline	8974|5033|5034
18242	1.8304e-05	3	protein amino acid O-linked glycosylation via serine	2589|2590|2591
18243	1.8304e-05	3	protein amino acid O-linked glycosylation via threonine	2589|2590|2591
9226	1.8304e-05	3	nucleotide-sugar biosynthetic process	7264|5373|2762
19471	1.8304e-05	3	4-hydroxyproline metabolic process	8974|5033|5034
19511	1.8304e-05	3	peptidyl-proline hydroxylation	8974|5033|5034
15015	1.8304e-05	3	heparan sulfate proteoglycan biosynthetic process, enzymatic modification	222537|9394|9953
6189	1.8304e-05	3	'de novo' IMP biosynthetic process	10606|2618|5198
42375	2.0626e-05	5	quinone cofactor metabolic process	10229|51805|51004|873|27235
6672	2.3906e-05	8	ceramide metabolic process	64781|57733|9514|2583|2581|8869|2717|8879
30148	2.4705e-05	7	sphingolipid biosynthetic process	53947|30815|9514|2583|8869|6489|29906
8272	3.027e-05	5	sulfate transport	115019|115111|284129|5172|116369
9113	3.0873e-05	4	purine base biosynthetic process	353|5471|10606|2618
6677	3.0873e-05	4	glycosylceramide metabolic process	57733|9514|2581|2717
19377	3.0873e-05	4	glycolipid catabolic process	57733|2581|2717|4668
19318	3.2627e-05	16	hexose metabolic process	9945|8534|2683|5373|5372|2762|10690|5973|4122|7264|4124|2673|4123|8790|2523|2530
7584	3.9653e-05	15	response to nutrient	10999|240|6546|3294|1603|1594|1591|1583|410|8443|1543|249|3141|411|4056
9150	4.6863e-05	13	purine ribonucleotide metabolic process	2643|2618|5198|496|495|491|492|493|5471|10606|471|490|65220
45426	5.4413e-05	4	quinone cofactor biosynthetic process	10229|51805|51004|27235
6743	5.4413e-05	4	ubiquinone metabolic process	10229|51805|51004|27235
6744	5.4413e-05	4	ubiquinone biosynthetic process	10229|51805|51004|27235
10817	5.4622e-05	14	regulation of hormone levels	6716|6715|15|3283|1588|1312|1586|1585|1584|1583|7363|8528|1543|438
9168	5.9709e-05	5	purine ribonucleoside monophosphate biosynthetic process	5471|471|10606|2618|5198
9127	5.9709e-05	5	purine nucleoside monophosphate biosynthetic process	5471|471|10606|2618|5198
46519	6.0049e-05	8	sphingoid metabolic process	64781|57733|9514|2583|2581|8869|2717|8879
44242	6.434e-05	10	cellular lipid catabolic process	8310|10999|57733|10005|2581|1384|2717|1632|8879|4668
30202	7.1778e-05	3	heparin metabolic process	55790|26035|9653
18208	7.1778e-05	3	peptidyl-proline modification	8974|5033|5034
50651	7.1778e-05	3	dermatan sulfate proteoglycan biosynthetic process	55454|55790|55501
46477	7.1778e-05	3	glycosylceramide catabolic process	57733|2581|2717
46466	8.0889e-05	5	membrane lipid catabolic process	57733|2581|2717|8879|4668
6518	9.0679e-05	8	peptide metabolic process	51022|23478|2687|28972|90701|9789|60559|4258
16042	9.3245e-05	15	lipid catabolic process	6716|10999|57733|2581|1384|2717|8310|1594|1591|10005|7363|8879|1632|1544|4668
55067	0.0001033	7	monovalent inorganic cation homeostasis	389015|57468|6553|57282|5172|495|1585
9259	0.00010724	13	ribonucleotide metabolic process	2643|2618|5198|496|495|491|492|493|5471|10606|471|490|65220
9167	0.00010741	5	purine ribonucleoside monophosphate metabolic process	5471|471|10606|2618|5198
9126	0.00010741	5	purine nucleoside monophosphate metabolic process	5471|471|10606|2618|5198
15837	0.00016861	11	amine transport	9056|9057|6531|6509|6530|6536|6572|6581|8140|23428|6529
6488	0.00017592	3	dolichol-linked oligosaccharide biosynthetic process	79087|85365|1798
6693	0.00017996	5	prostaglandin metabolic process	11283|6916|9536|5740|80142
6692	0.00017996	5	prostanoid metabolic process	11283|6916|9536|5740|80142
46112	0.00020069	4	nucleobase biosynthetic process	353|5471|10606|2618
6816	0.0002107	12	calcium ion transport	491|492|1594|493|6546|9187|6543|490|6547|123041|25769|57419
18130	0.00021442	8	heterocycle biosynthetic process	353|5860|2643|6697|15|3620|5805|438
6576	0.00022022	10	cellular biogenic amine metabolic process	113451|6531|2643|15|8424|3620|1312|55217|79814|438
6885	0.00023501	6	regulation of pH	389015|57468|6553|57282|5172|495
42559	0.00028387	4	pteridine and derivative biosynthetic process	5860|2643|6697|5805
6706	0.0002849	5	steroid catabolic process	6716|1594|1591|7363|1544
9152	0.00028925	11	purine ribonucleotide biosynthetic process	491|492|493|5471|471|10606|490|2618|5198|496|495
70838	0.0003394	12	divalent metal ion transport	491|492|1594|493|6546|9187|6543|490|6547|123041|25769|57419
6702	0.00034494	3	androgen biosynthetic process	6716|6715|3283
46514	0.00034494	3	ceramide catabolic process	57733|2581|2717
51186	0.00034726	15	cofactor metabolic process	51022|8875|2643|10229|8876|51004|4258|27235|2687|10005|51805|873|1543|65220|1544
9156	0.00035214	5	ribonucleoside monophosphate biosynthetic process	5471|471|10606|2618|5198
51923	0.00038916	4	sulfation	222537|10090|10164|23563
55086	0.00049578	19	nucleobase, nucleoside and nucleotide metabolic process	3704|2643|2618|5198|496|495|1788|1789|353|491|51251|492|493|5471|10606|471|490|1635|65220
8209	0.00051967	4	androgen metabolic process	6716|6715|1588|3283
6144	0.00051967	4	purine base metabolic process	353|5471|10606|2618
9161	0.00052182	5	ribonucleoside monophosphate metabolic process	5471|471|10606|2618|5198
9260	0.00054454	11	ribonucleotide biosynthetic process	491|492|493|5471|471|10606|490|2618|5198|496|495
6700	0.00059182	3	C21-steroid hormone biosynthetic process	1583|1585|1584
46521	0.00059182	3	sphingoid catabolic process	57733|2581|2717
6163	0.00065604	13	purine nucleotide metabolic process	2643|2618|5198|496|495|491|492|493|5471|10606|471|490|65220
30311	0.00069635	2	poly-N-acetyllactosamine biosynthetic process	11041|374907
8212	0.00069635	2	mineralocorticoid metabolic process	1585|1584
51571	0.00069635	2	positive regulation of histone H3-K4 methylation	1786|1789
6005	0.00069635	2	L-fucose biosynthetic process	7264|2762
5989	0.00069635	2	lactose biosynthetic process	2683|3906
5988	0.00069635	2	lactose metabolic process	2683|3906
1574	0.00069635	2	ganglioside biosynthetic process	2583|8869
50653	0.00069635	2	chondroitin sulfate proteoglycan biosynthetic process, polysaccharide chain biosynthetic process	55454|55790
19532	0.00069635	2	oxalate transport	115111|116369
19673	0.00069635	2	GDP-mannose metabolic process	5373|2762
6496	0.00069635	2	protein amino acid terminal N-glycosylation	1650|2683
6494	0.00069635	2	protein amino acid terminal glycosylation	1650|2683
32776	0.00069635	2	DNA methylation on cytosine	1788|1789
32342	0.00069635	2	aldosterone biosynthetic process	1585|1584
32341	0.00069635	2	aldosterone metabolic process	1585|1584
10424	0.00069635	2	DNA methylation on cytosine within a CG sequence	1788|1789
6705	0.00069635	2	mineralocorticoid biosynthetic process	1585|1584
18894	0.00069635	2	dibenzo-p-dioxin metabolic process	1543|1544
15939	0.00069635	2	pantothenate metabolic process	8875|8876
42353	0.00069635	2	fucose biosynthetic process	7264|2762
42339	0.00069635	2	keratan sulfate metabolic process	8534|4166
42350	0.00069635	2	GDP-L-fucose biosynthetic process	7264|2762
42351	0.00069635	2	'de novo' GDP-L-fucose biosynthetic process	7264|2762
46368	0.00069635	2	GDP-L-fucose metabolic process	7264|2762
46351	0.00069635	2	disaccharide biosynthetic process	2683|3906
19307	0.00069635	2	mannose biosynthetic process	5373|5372
6732	0.0008016	12	coenzyme metabolic process	51022|2687|10005|10229|2643|8875|8876|51805|51004|65220|4258|27235
30149	0.00086894	4	sphingolipid catabolic process	57733|2581|2717|8879
6541	0.00086894	4	glutamine metabolic process	9945|5471|2673|5198
19438	0.00086894	4	aromatic compound biosynthetic process	5860|2643|6697|5805
48703	0.0009284	3	embryonic viscerocranium morphogenesis	3340|2673|50515
18193	0.001004	12	peptidyl-amino acid modification	2589|54344|1650|6184|8974|5033|5034|6185|4247|2590|1603|2591
6164	0.0010888	11	purine nucleotide biosynthetic process	491|492|493|5471|471|10606|490|2618|5198|496|495
46165	0.0011147	6	alcohol biosynthetic process	117283|7264|5373|5372|1798|2762
46942	0.0011551	11	carboxylic acid transport	9056|10999|9057|6509|115111|6536|8140|23428|1645|116369|6529
15849	0.0012246	11	organic acid transport	9056|10999|9057|6509|115111|6536|8140|23428|1645|116369|6529
34654	0.0012251	13	nucleobase, nucleoside, nucleotide and nucleic acid biosynthetic process	2618|5198|496|495|491|353|492|493|5471|10606|471|490|1635
34404	0.0012251	13	nucleobase, nucleoside and nucleotide biosynthetic process	2618|5198|496|495|491|353|492|493|5471|10606|471|490|1635
6766	0.001321	8	vitamin metabolic process	1594|1591|1583|873|8424|1543|79178|55217
42355	0.0013654	3	L-fucose catabolic process	10690|2523|2530
19317	0.0013654	3	fucose catabolic process	10690|2523|2530

## Sheet: liver_kidney_0.01
Selected statistical test : Hypergeometric test
Selected correction : Benjamini & Hochberg False Discovery Rate (FDR) correction
Selected significance level : 0.01
Testing option : Use whole annotation as reference set
GO-ID	p-value	gene-num	Description	Genes in test set
44281	1.2885e-19	33	small molecule metabolic process	64802|763|5106|10797|10873|1595|217|55586|5009|435|2224|7352|25902|1152|3712|11238|1468|1158|6648|3158|4191|5625|56953|5831|4833|23169|5337|50808|587|2542|10165|10166|50
6839	5.8339e-15	11	mitochondrial transport	1468|7351|7352|788|7350|8604|10165|6576|10166|83884|9016
55085	2.1624e-14	20	transmembrane transport	1468|79751|26503|83733|788|8604|115286|83884|366|7351|9481|7352|89874|7350|2542|10165|6576|10166|60386|9016
19752	2.361e-13	19	carboxylic acid metabolic process	3712|1468|1158|5106|10797|10873|4191|5625|5009|435|5831|23169|25902|7352|5337|1152|587|10166|50
43436	2.361e-13	19	oxoacid metabolic process	3712|1468|1158|5106|10797|10873|4191|5625|5009|435|5831|23169|25902|7352|5337|1152|587|10166|50
6082	2.9428e-13	19	organic acid metabolic process	3712|1468|1158|5106|10797|10873|4191|5625|5009|435|5831|23169|25902|7352|5337|1152|587|10166|50
42180	3.6571e-13	19	cellular ketone metabolic process	3712|1468|1158|5106|10797|10873|4191|5625|5009|435|5831|23169|25902|7352|5337|1152|587|10166|50
46942	6.1537e-12	11	carboxylic acid transport	366|1468|79751|26503|788|8604|10165|6576|115286|10166|83884
15849	6.6586e-12	11	organic acid transport	366|1468|79751|26503|788|8604|10165|6576|115286|10166|83884
44283	1.4677e-09	14	small molecule biosynthetic process	64802|1158|1468|5106|5625|5009|435|4833|5831|23169|5337|50808|587|10165
8152	9.6758e-09	45	metabolic process	64802|763|5106|10873|10797|4353|219|1595|8760|217|27068|55586|5009|366|2224|435|25902|7352|1152|84532|3712|11238|1468|1158|204|205|6648|3158|4191|5625|56953|8604|4833|5831|23169|9481|5337|10935|50808|587|2542|10165|10166|50|9016
15837	1.2265e-08	8	amine transport	366|79751|788|8604|10165|115286|10166|83884
44237	1.2458e-08	41	cellular metabolic process	64802|763|5106|10873|10797|4353|8760|27068|55586|5009|2224|435|25902|7352|1152|84532|3712|11238|1468|1158|204|205|6648|3158|4191|5625|56953|8604|4833|5831|23169|9481|5337|10935|50808|587|2542|10165|10166|50|9016
55114	2.1679e-08	15	oxidation reduction	3712|6648|10797|10873|4353|4191|219|1595|217|5625|55586|8604|5831|10935|10165
9058	2.4055e-08	24	biosynthetic process	64802|1468|1158|6648|5106|10797|3158|1595|8760|5625|56953|5009|2224|435|4833|5831|23169|25902|5337|50808|84532|587|10165|10166
44249	3.7271e-08	23	cellular biosynthetic process	64802|1468|1158|6648|5106|10797|3158|8760|5625|56953|5009|2224|435|4833|5831|23169|25902|5337|50808|84532|587|10165|10166
6865	4.2285e-08	7	amino acid transport	79751|788|8604|10165|115286|10166|83884
45333	9.8723e-08	7	cellular respiration	6648|10873|4191|8604|10165|50|9016
9987	1.524e-07	54	cellular process	64802|10797|4353|788|27068|55586|435|7351|7352|1152|7350|84532|60386|3712|11238|204|205|79751|6648|4191|56953|5831|4833|23169|9481|587|10165|10166|9016|763|5106|10873|8760|217|115286|5009|2224|366|25902|89874|1158|1468|26503|83733|3158|5625|8604|83884|5337|10935|50808|2542|6576|50
9084	5.185e-07	4	glutamine family amino acid biosynthetic process	5831|435|5625|5009
44271	5.6503e-07	10	cellular nitrogen compound biosynthetic process	5831|4833|435|64802|5625|50808|587|10165|5009|10166
6519	1.5341e-06	10	cellular amino acid and derivative metabolic process	5831|3712|435|1158|6648|5625|1152|587|5009|10166
15980	1.645e-06	7	energy derivation by oxidation of organic compounds	6648|10873|4191|8604|10165|50|9016
8652	1.7144e-06	5	cellular amino acid biosynthetic process	5831|435|5625|587|5009
6732	2.4605e-06	7	coenzyme metabolic process	64802|6648|25902|10797|4191|84532|50
16053	3.5897e-06	7	organic acid biosynthetic process	5831|435|23169|5337|5625|587|5009
46394	3.5897e-06	7	carboxylic acid biosynthetic process	5831|435|23169|5337|5625|587|5009
9308	4.2464e-06	10	amine metabolic process	5831|3712|435|1158|23169|5625|1152|587|5009|10166
10035	4.2683e-06	8	response to inorganic substance	366|6648|7351|7352|10935|4353|8604|10165
6066	7.0257e-06	10	alcohol metabolic process	2224|1468|23169|5106|3158|4191|1595|217|55586|2542
50	7.0555e-06	3	urea cycle	435|5009|10166
303	7.0555e-06	3	response to superoxide	6648|7351|7352
9060	9.6067e-06	4	aerobic respiration	10873|4191|50|9016
19627	9.6738e-06	3	urea metabolic process	435|5009|10166
305	9.6738e-06	3	response to oxygen radical	6648|7351|7352
43604	9.6738e-06	3	amide biosynthetic process	435|5009|10166
66	1.5598e-05	2	mitochondrial ornithine transport	10166|83884
15822	1.5598e-05	2	ornithine transport	10166|83884
51186	1.5632e-05	7	cofactor metabolic process	64802|6648|25902|10797|4191|84532|50
15813	1.6673e-05	3	L-glutamate transport	79751|8604|10165
15711	1.8598e-05	4	organic anion transport	79751|8604|10165|6576
15800	2.1161e-05	3	acidic amino acid transport	79751|8604|10165
302	2.286e-05	5	response to reactive oxygen species	6648|7351|7352|10935|4353
9309	2.286e-05	5	amine biosynthetic process	5831|435|5625|587|5009
70887	2.5655e-05	9	cellular response to chemical stimulus	366|5831|6648|7351|7352|10935|4353|217|7350
6091	3.0522e-05	8	generation of precursor metabolites and energy	9481|6648|10873|4191|8604|10165|50|9016
6820	3.17e-05	5	anion transport	79751|26503|8604|10165|6576
6520	3.3821e-05	7	cellular amino acid metabolic process	5831|3712|435|5625|587|5009|10166
43490	4.6673e-05	2	malate-aspartate shuttle	8604|10165
9064	4.9225e-05	4	glutamine family amino acid metabolic process	5831|435|5625|5009
46907	5.2645e-05	11	intracellular transport	1468|7351|7352|788|7350|8604|10165|6576|10166|83884|9016
46483	5.2725e-05	8	heterocycle metabolic process	5831|4833|25902|10797|5625|50808|56953|10165
43603	5.5539e-05	3	cellular amide metabolic process	435|5009|10166
34599	6.1744e-05	4	cellular response to oxidative stress	5831|6648|10935|4353
44282	8.2882e-05	7	small molecule catabolic process	3712|435|4191|5625|587|56953|55586
6979	8.7842e-05	6	response to oxidative stress	5831|6648|7351|7352|10935|4353
6526	9.3106e-05	2	arginine biosynthetic process	435|5009
9108	0.00012795	4	coenzyme biosynthetic process	64802|25902|10797|84532
6800	0.00012795	4	oxygen and reactive oxygen species metabolic process	6648|10873|10935|4353
6695	0.00012961	3	cholesterol biosynthetic process	2224|3158|1595
42743	0.0001461	3	hydrogen peroxide metabolic process	6648|10935|4353
6551	0.00015478	2	leucine metabolic process	3712|587
6090	0.0001639	3	pyruvate metabolic process	1468|5106|10873
9063	0.00017074	4	cellular amino acid catabolic process	3712|435|5625|587
6807	0.00018802	20	nitrogen compound metabolic process	64802|3712|1158|204|205|10797|4191|5625|56953|5009|435|4833|5831|23169|25902|1152|50808|587|10165|10166
32787	0.00019423	7	monocarboxylic acid metabolic process	1468|23169|5106|25902|10873|7352|10797
44106	0.00021465	7	cellular amine metabolic process	5831|3712|435|5625|587|5009|10166
6084	0.00022558	3	acetyl-CoA metabolic process	4191|84532|50
15810	0.00023157	2	aspartate transport	8604|10165
9310	0.00028594	4	amine catabolic process	3712|435|5625|587
16126	0.00032874	3	sterol biosynthetic process	2224|3158|1595
6560	0.00043006	2	proline metabolic process	5831|5625
6108	0.00043006	2	malate metabolic process	10873|4191
9396	0.00043006	2	folic acid and derivative biosynthetic process	25902|10797
34614	0.00045824	3	cellular response to reactive oxygen species	6648|10935|4353
42221	0.00046082	15	response to chemical stimulus	205|6648|5106|4353|3158|217|8604|5831|366|7351|7352|5337|10935|7350|10165
51649	0.00052667	11	establishment of localization in cell	1468|7351|7352|788|7350|8604|10165|6576|10166|83884|9016
46653	0.00055152	2	tetrahydrofolate metabolic process	25902|10797
6600	0.00055152	2	creatine metabolic process	1158|1152
6599	0.00055152	2	phosphagen metabolic process	1158|1152
6810	0.0005819	21	transport	1468|79751|26503|83733|788|8604|115286|83884|366|23169|7351|9481|7352|89874|7350|2542|10165|6576|10166|60386|9016
43648	0.00061659	3	dicarboxylic acid metabolic process	5106|10873|4191
51188	0.00064346	4	cofactor biosynthetic process	64802|25902|10797|84532
55093	0.00068764	2	response to hyperoxia	6648|217
51234	0.00069656	21	establishment of localization	1468|79751|26503|83733|788|8604|115286|83884|366|23169|7351|9481|7352|89874|7350|2542|10165|6576|10166|60386|9016
9719	0.00070308	8	response to endogenous stimulus	205|5106|7351|7352|5337|3158|217|7350
6107	0.0008383	2	oxaloacetate metabolic process	5106|4191
51881	0.0008383	2	regulation of mitochondrial membrane potential	6648|10935
9117	0.00085259	6	nucleotide metabolic process	4833|64802|4191|50808|56953|10165
6753	0.00085259	6	nucleoside phosphate metabolic process	4833|64802|4191|50808|56953|10165
15718	0.00085872	3	monocarboxylic acid transport	366|26503|788
44248	0.00088206	10	cellular catabolic process	3712|435|5337|10935|4353|4191|5625|587|56953|50
9083	0.0010034	2	branched chain family amino acid catabolic process	3712|587
5975	0.0010191	8	carbohydrate metabolic process	1468|23169|5106|219|4191|217|55586|2542
6525	0.0011828	2	arginine metabolic process	435|5009
55081	0.0011828	2	anion homeostasis	1152|5009
16054	0.0012403	4	organic acid catabolic process	3712|435|5625|587
46395	0.0012403	4	carboxylic acid catabolic process	3712|435|5625|587
55086	0.0013012	6	nucleobase, nucleoside and nucleotide metabolic process	4833|64802|4191|50808|56953|10165
51641	0.0014375	11	cellular localization	1468|7351|7352|788|7350|8604|10165|6576|10166|83884|9016
6730	0.0015801	4	one-carbon metabolic process	763|11238|25902|10797
